# Supplementary material for: Diverse ring-opening reactions of rhodium η4-azaborete complexes
Source: Royal Society of Chemistry journal article supplement (doi:10.1039/d0sc02283g), 2020-01-01
Supplement: d0sc02283g1.pdf [file d0sc02283g1.pdf]

**Supporting information for:**

**Diverse Ring-Opening Reactions of Rhodium  $\eta^4$ -  
Azaborete Complexes**

Merlin Heß, Tom E. Stennett, Felipe Fantuzzi, Rüdiger Bertermann, Marvin Schock, Marius Schäfer, Torsten Thiess, Holger Braunschweig\*

*Institute for Inorganic Chemistry and Institute for Sustainable Chemistry & Catalysis with Boron, Julius-Maximilians-Universität Würzburg, Am Hubland, 97074 Würzburg, Germany*

**Table of contents**

|                                       |     |
|---------------------------------------|-----|
| General considerations.....           | 2   |
| Synthetic procedures .....            | 3   |
| NMR spectra .....                     | 34  |
| UV-Vis spectra.....                   | 97  |
| Crystal structure determination ..... | 102 |
| Computational details .....           | 115 |
| Cartesian coordinates.....            | 120 |
| References.....                       | 151 |

## General considerations

All manipulations were performed under an atmosphere of dry argon using glovebox or standard Schlenk line techniques. Deuterated solvents were dried over 4 Å molecular sieves and degassed by three freeze-pump-thaw cycles. All other solvents were dried by distillation from appropriate drying agents under an argon atmosphere and stored under argon over activated 4 Å molecular sieves. All NMR spectra were obtained from a Bruker Avance III HD 300 NMR spectrometer ( $^{13}\text{C}\{^1\text{H}, ^{31}\text{P}\}$ : 75.5 MHz), from a Bruker Avance I 400 NMR spectrometer ( $^1\text{H}$ : 400.6 MHz,  $^{13}\text{C}\{^1\text{H}\}$ : 100.6 MHz,  $^{11}\text{B}$ : 128.5 MHz,  $^{31}\text{P}\{^1\text{H}\}$ : 162.2 MHz,  $^{19}\text{F}$ : 376.5 MHz) or from a Bruker Avance I 500 NMR spectrometer ( $^1\text{H}$ : 500.1 MHz,  $^1\text{H}\{^{31}\text{P}\}$ : 500.1 MHz,  $^{13}\text{C}\{^1\text{H}\}$ : 125.8 MHz,  $^{11}\text{B}$ : 160.5 MHz,  $^{31}\text{P}\{^1\text{H}\}$ : 202.5 MHz,  $^{19}\text{F}$ : 470.6 MHz) at 298 K unless otherwise stated. Chemical shifts ( $\delta$ ) are provided in ppm and internally referenced to the carbon nuclei ( $^{13}\text{C}\{^1\text{H}\}$ ,  $^{13}\text{C}\{^1\text{H}, ^{31}\text{P}\}$ ) or residual protons ( $^1\text{H}$ ,  $^1\text{H}\{^{31}\text{P}\}$ ) of the solvent.  $^{11}\text{B}$ ,  $^{31}\text{P}\{^1\text{H}\}$  and  $^{19}\text{F}$  NMR spectra were referenced against external  $\text{BF}_3\cdot\text{Et}_2\text{O}$ , 85%  $\text{H}_3\text{PO}_4$  or  $\text{Cl}_3\text{CF}$ , respectively. For higher-order spin systems of the  $\text{P}(\text{CH}_3)_3$  groups  $N$  ( $N = |^1J_{\text{PC}} + ^3J_{\text{PC}}|$  or  $|^2J_{\text{PH}} + ^4J_{\text{PH}}|$ ) is given. UV/Vis absorption spectra were measured on a JASCO V-660 UV/Vis spectrometer or on a METTLER TOLEDO UV/Vis-Excellence UV5 spectrophotometer. High-resolution mass spectrometry data were acquired on a Thermo Scientific Exactive Plus Spectrometer in LIFDI or ASAP mode. Photoreactions were performed using a LOT-Quantum Design GmbH mercury-xenon vapor lamp ( $I = 19 \text{ A}$ ,  $U = 26 \text{ V}$ ).

Chemicals:  $[\{(\text{COE})_2\text{RhCl}\}_2]$ ,<sup>1</sup> trimethylphosphine,<sup>2</sup> triisopropylphosphine,<sup>3</sup> (*tert*-butylimino)mesitylborane,<sup>4</sup> *N,N*-dimethyl-4-[2-[4-trifluoromethyl]phenyl]ethynyl]-benzenamine,<sup>5</sup> ethynylferrocene,<sup>6</sup> 1,3-dimethylimidazol-2-ylidene (IMe),<sup>7</sup> 1,3-diisopropylimidazol-2-ylidene (IiPr)<sup>8</sup> and **1b**<sup>4</sup> were synthesized according to modified literature procedures.  $[\{(\text{PiPr}_3)_2\text{RhCl}\}_2]$  was prepared in situ according to a modified literature procedure.<sup>9</sup> All other chemicals were purchased from either abcr, Acros, Sigma-Aldrich or TCI Chemical Co. and used without further purification.

The rhodium azaborete complexes **1a**, **1c**, **1d**, **1e**, **1f**, **1g**, **1h**, **1i**, **1j**, **1k** and **1l** were synthesized according to a standardized procedure adapted from a previously published route.<sup>10</sup> All manipulations (except the washing procedure) during the synthesis of the complexes **1a**, **1b**,<sup>4</sup> **1c**, **1d**, **1e**, **1f**, **1g**, **1h**, **1i**, **1j**, **1k** and **1l** were performed as far as possible with the exclusion of light.

## Synthetic procedures

### Abbreviations

|             |                                            |
|-------------|--------------------------------------------|
| Aza         | azaborete (four-membered ring system)      |
| Aza1        | azaborinine (six-membered ring system)     |
| Bpin        | 4,4,5,5-tetramethyl-1,3,2-dioxaborolanyl   |
| br          | broad                                      |
| COE         | cyclooctene                                |
| Cp          | cyclopentadienyl                           |
| d           | doublet                                    |
| Et          | ethyl                                      |
| Fc          | ferrocenyl                                 |
| IiPr        | 1,3-di <i>is</i> opropylimidazol-2-ylidene |
| IMe         | 1,3-dimethylimidazol-2-ylidene             |
| <i>i</i> Pr | <i>is</i> opropyl                          |
| m           | multiplet                                  |
| Me          | methyl                                     |
| Mes         | mesityl = 2,4,6-trimethylphenyl            |
| Ph          | phenyl                                     |
| q           | quartet                                    |
| s           | singlet                                    |
| sept        | septet                                     |
| t           | triplet                                    |
| <i>t</i> Bu | <i>tert</i> -butyl                         |
| THF         | tetrahydrofuran                            |
| v           | virtual                                    |

## Synthesis of **1a**

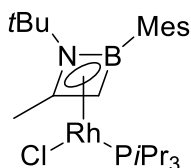

[[ $(\text{COE})_2\text{RhCl}$ ] $_2$ ] (1.00 g, 1.39 mmol) was suspended in pentane (15 mL) and triisopropylphosphine (2.00 mL, 10.5 mmol) was added. After stirring the reaction mixture for 15 min, propyne was passed through the suspension for 2 min. All volatiles were removed *in vacuo* and the residue was dissolved in THF (15 mL). A stock solution of (*tert*-butylimino)mesitylborane in heptane (3.45 mL, 6.97 mmol, 2.02 M) was added and the reaction mixture was stirred for 15 h at room temperature. After removing all volatiles *in vacuo* the residue was washed with pentane (5 x 5 mL) and dried under reduced pressure to yield **1a** as a yellow solid (1.27 g, 2.35 mmol, 85%). Crystals of **1a** suitable for X-ray diffraction were obtained by evaporation of a saturated pentane solution at  $-30\text{ }^\circ\text{C}$ .

$^1\text{H NMR}$  (500.1 MHz,  $\text{C}_6\text{D}_6$ , 298 K):  $\delta$  = 6.83 (s, 2H, Mes-CH), 3.39 (s, 3H, Mes-CH $_3$ ), 2.78 (s, 1H, Aza-CH), 2.54 (s, 3H, Mes-CH $_3$ ), 2.18-2.08 (m, 3H, *i*Pr-CH) overlapping with 2.14 (s, 3H, Mes-CH $_3$ ), 1.53 (s, 3H, Aza-CH $_3$ ), 1.34 (s, 9H, *t*Bu-CH $_3$ ), 1.12 (dd,  $^3J_{\text{PH}} = 14.0\text{ Hz}$ ,  $^3J_{\text{HH}} = 7.3\text{ Hz}$ , 9H, *i*Pr-CH $_3$ ), 1.07 (dd,  $^3J_{\text{PH}} = 13.3\text{ Hz}$ ,  $^3J_{\text{HH}} = 7.2\text{ Hz}$ , 9H, *i*Pr-CH $_3$ ) ppm.

$^1\text{H}\{^{31}\text{P}\}$  NMR (500.1 MHz,  $\text{C}_6\text{D}_6$ , 298 K):  $\delta$  = 6.83-6.82 (m, 2H, Mes-CH), 3.38 (s, 3H, Mes-CH $_3$ ), 2.78 (s, 1H, Aza-CH), 2.54 (s, 3H, Mes-CH $_3$ ), 2.17-2.09 (m, 3H, *i*Pr-CH) overlapping with 2.14 (s, 3H, Mes-CH $_3$ ), 1.53 (s, 3H, Aza-CH $_3$ ), 1.34 (s, 9H, *t*Bu-CH $_3$ ), 1.12 (d,  $^3J_{\text{HH}} = 7.2\text{ Hz}$ , 9H, *i*Pr-CH $_3$ ), 1.07 (d,  $^3J_{\text{HH}} = 7.2\text{ Hz}$ , 9H, *i*Pr-CH $_3$ ) ppm.

$^{13}\text{C}\{^1\text{H}\}$  NMR (125.8 MHz,  $\text{C}_6\text{D}_6$ , 298 K):  $\delta$  = 141.5 (s, Mes-C $_q$ ), 140.4 (s, Mes-C $_q$ ), 138.1 (s, Mes-C $_q$ ), 131.1 (bs, Mes-C $_q$ ), 128.5 (s, Mes-CH), 127.5 (s, Mes-CH), 103.8-103.7 (m, Aza-C $_q$ ), 56.0 (d,  $^3J_{\text{PC}} = 1.5\text{ Hz}$ , *t*Bu-C $_q$ ), 49.0 (bs, Aza-CH), 29.0 (d,  $^4J_{\text{PC}} = 2.9\text{ Hz}$ , *t*Bu-CH $_3$ ), 26.9 (d,  $^4J_{\text{RhC}} = 0.5\text{ Hz}$ , Mes-CH $_3$ ), 25.2 (dd,  $^1J_{\text{PC}} = 21.0\text{ Hz}$ ,  $^2J_{\text{RhC}} = 1.3\text{ Hz}$ , *i*Pr-CH), 23.7 (s, Mes-CH $_3$ ), 21.3 (s, Mes-CH $_3$ ), 20.3 (dd,  $^2J_{\text{PC}} = 1.9\text{ Hz}$ ,  $^3J_{\text{RhC}} = 0.5\text{ Hz}$ , *i*Pr-CH $_3$ ), 19.6 (s, *i*Pr-CH $_3$ ), 19.6 (d,  $^2J_{\text{RhC}} = 1.3\text{ Hz}$ , Aza-CH $_3$ ) ppm.

$^{13}\text{C}\{^1\text{H}, ^{31}\text{P}\}$  NMR (75.5 MHz,  $\text{C}_6\text{D}_6$ , 298 K):  $\delta$  = 141.5 (s, Mes-C $_q$ ), 140.4 (s, Mes-C $_q$ ), 138.1 (s, Mes-C $_q$ ), 128.5 (s, Mes-CH), 127.5 (s, Mes-CH), 103.9-103.7 (m, Aza-C $_q$ ), 56.0 (s, *t*Bu-C $_q$ ), 49.0 (bs, Aza-CH), 29.1 (s, *t*Bu-CH $_3$ ), 26.9 (d,  $^4J_{\text{RhC}} = 0.6\text{ Hz}$ , Mes-CH $_3$ ), 25.2 (d,

$^2J_{\text{RhC}} = 1.5$  Hz, *iPr*-CH), 23.7 (s, Mes-CH<sub>3</sub>), 21.3 (s, Mes-CH<sub>3</sub>), 20.3 (d,  $^3J_{\text{RhC}} = 0.7$  Hz, *iPr*-CH<sub>3</sub>), 19.6 (d,  $^3J_{\text{RhC}} = 0.6$  Hz, *iPr*-CH<sub>3</sub>), 19.6 (d,  $^2J_{\text{RhC}} = 1.4$  Hz, Aza-CH<sub>3</sub>) ppm.

*Comment: The broad singlet corresponding to the Mes-C<sub>q</sub> nucleus bound to the boron atom could not be observed in the  $^{13}\text{C}\{^1\text{H}, ^{31}\text{P}\}$  NMR spectrum.*

$^{11}\text{B}$  NMR (160.5 MHz, C<sub>6</sub>D<sub>6</sub>, 298 K):  $\delta = 20.9$  (br s) ppm.

$^{31}\text{P}\{^1\text{H}\}$  NMR (202.5 MHz, C<sub>6</sub>D<sub>6</sub>, 298 K):  $\delta = 61.0$  (d,  $^1J_{\text{RhP}} = 197$  Hz) ppm.

HRMS (LIFDI, C<sub>25</sub>H<sub>45</sub>BClNPRh): *calcd*:  $m/z = 539.2121$ , *found*:  $m/z = 539.2116$ .

UV-vis (hexane):  $\lambda_{\text{abs}} = 240, 296$  (shoulder), 383 nm.

## Synthesis of **1c**

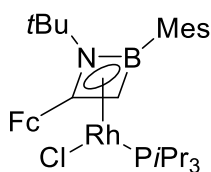

[(COE)<sub>2</sub>RhCl]<sub>2</sub>] (400 mg, 557  $\mu\text{mol}$ ) was suspended in pentane (12 mL) and treated with triisopropylphosphine (0.80 mL, 4.19 mmol). After stirring the suspension for 10 min, ethynylferrocene (233 mg, 1.11 mmol) was added. The reaction mixture was stirred for 10 min and all volatiles were removed *in vacuo*. The residue was dissolved in THF (10 mL) and treated with a stock solution of (*tert*-butylimino)mesitylborane in heptane (1.45 mL, 2.79 mmol, 1.93 M). The reaction mixture was stirred for 15 h at ambient temperature and all volatiles were removed *in vacuo*. The residue was washed with pentane (6 x 4 mL) and dried under reduced pressure to yield **1c** as a red solid (582 mg, 820  $\mu\text{mol}$ , 74%). Crystals of **1c** suitable for X-ray diffraction were obtained by evaporation of a saturated hexane/benzene (5:1) solution.

$^1\text{H}$  NMR (500.1 MHz, C<sub>6</sub>D<sub>6</sub>, 298 K):  $\delta = 6.88$  (s, 2H, Mes-CH), 4.440-4.435 (m, 1H, C<sub>5</sub>H<sub>4</sub>-CH), 4.35-4.34 (m, 1H, C<sub>5</sub>H<sub>4</sub>-CH), 4.09 (s, 5H, Cp-CH), 4.06-4.05 (m, 1H, C<sub>5</sub>H<sub>4</sub>-CH), 4.04-4.03 (m, 1H, C<sub>5</sub>H<sub>4</sub>-CH), 3.45 (s, 3H, Mes-CH<sub>3</sub>), 3.17 (s, 1H, Aza-CH), 2.72 (s, 3H, Mes-CH<sub>3</sub>), 2.24-2.16 (m, 3H, *iPr*-CH) overlapping with 2.18 (s, 3H, Mes-CH<sub>3</sub>), 1.56 (s, 9H, *tBu*-CH<sub>3</sub>), 1.15 (dd,  $^3J_{\text{PH}} = 13.5$  Hz,  $^3J_{\text{HH}} = 7.2$  Hz, 9H, *iPr*-CH<sub>3</sub>), 1.11 (dd,  $^3J_{\text{PH}} = 13.5$  Hz,  $^3J_{\text{HH}} = 7.2$  Hz, 9H, *iPr*-CH<sub>3</sub>) ppm.

*Comment: The spectrum contains residual hexane from the crystallization process, corresponding to signals at 1.25 (m) and 0.89 (t) ppm.*

$^{13}\text{C}\{^1\text{H}\}$  NMR (125.8 MHz,  $\text{C}_6\text{D}_6$ , 298 K):  $\delta = 141.5$  (s, Mes- $\text{C}_q$ ), 140.2 (s, Mes- $\text{C}_q$ ), 138.1 (s, Mes- $\text{C}_q$ ), 131.8 (s, Mes- $\text{C}_q$ ), 128.6 (s, Mes-CH), 127.5 (s, Mes-CH), 103.9-103.8 (m, Aza- $\text{C}_q$ ), 80.48-80.47 (m,  $\text{C}_5\text{H}_4$ - $\text{C}_q$ ), 71.0 (s,  $\text{C}_5\text{H}_4$ -CH), 70.6 (s,  $\text{C}_5\text{H}_4$ -CH), 69.9 (s, Cp-CH), 69.7 (s,  $\text{C}_5\text{H}_4$ -CH), 68.8 (s,  $\text{C}_5\text{H}_4$ -CH), 56.6 (d,  $^3J_{\text{PC}} = 1.7$  Hz, *t*Bu- $\text{C}_q$ ), 49.0 (br s, Aza-CH), 29.7 (d,  $^4J_{\text{PC}} = 2.8$  Hz, *t*Bu- $\text{CH}_3$ ), 27.4 (s, Mes- $\text{CH}_3$ ), 25.6 (dd,  $^1J_{\text{PC}} = 20.5$  Hz,  $^2J_{\text{RhC}} = 1.2$  Hz, *i*Pr-CH), 24.2 (s, Mes- $\text{CH}_3$ ), 21.3 (s, Mes- $\text{CH}_3$ ), 20.3 (s, *i*Pr- $\text{CH}_3$ ), 20.1 (s, *i*Pr- $\text{CH}_3$ ) ppm.

*Comment: The spectrum contains signals corresponding to residual hexane at 31.97, 23.06 and 14.35 ppm and residual benzene at 128.60 ppm resulting from the crystallization process.*

$^{11}\text{B}$  NMR (160.5 MHz,  $\text{C}_6\text{D}_6$ , 298 K):  $\delta = 20.5$  (br s) ppm.

$^{31}\text{P}\{^1\text{H}\}$  NMR (202.5 MHz,  $\text{C}_6\text{D}_6$ , 298 K):  $\delta = 58.0$  (d,  $^1J_{\text{RhP}} = 197$  Hz) ppm.

HRMS (LIFDI,  $\text{C}_{34}\text{H}_{51}\text{BClFeNPRh}$ ): *calcd*:  $m/z = 709.1940$ , *found*:  $m/z = 709.1925$ .

UV-vis (hexane):  $\lambda_{\text{abs}} = 311, 427$  nm.

## Synthesis of **1d**

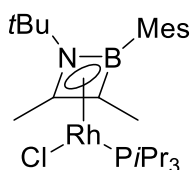

$[\{(\text{COE})_2\text{RhCl}\}_2]$  (440 mg, 613  $\mu\text{mol}$ ) was suspended in pentane (10 mL) and treated with triisopropylphosphine (0.88 mL, 4.61 mmol). After stirring the suspension for 10 min, 2-butyne (0.1 mL, 1.28 mmol) was added. The reaction mixture was stirred for 10 min and all volatiles were removed *in vacuo*. The residue was dissolved in THF (12 mL) and treated with a stock solution of (*tert*-butylimino)mesitylborane in heptane (1.22 mL, 2.46 mmol, 2.02 M). The reaction mixture was stirred for 15 h at room temperature and then all volatiles were removed *in vacuo*. The residue was washed with pentane (4 x 4 mL) and dried under reduced pressure to yield **1d** as a yellow solid (602 mg, 1.09 mmol, 89%). Crystals of **1d** suitable for X-ray diffraction were obtained by evaporation of a saturated hexane solution.

$^1\text{H}$  NMR (500.1 MHz,  $\text{C}_6\text{D}_6$ , 298 K):  $\delta = 6.84$  (s, 1H, Mes-CH), 6.80 (s, 1H, Mes-CH), 3.45 (s, 3H, Mes- $\text{CH}_3$ ), 2.42 (s, 3H, Mes- $\text{CH}_3$ ), 2.38-2.27 (m, 3H, *i*Pr-CH), 2.14 (s, 3H, Mes- $\text{CH}_3$ ), 1.47 (s, 3H, Aza- $\text{CH}_3$ ), 1.39 (s, 9H, *t*Bu- $\text{CH}_3$ ), 1.21-1.17 (m, 12H, *i*Pr- $\text{CH}_3$  overlapping with Aza- $\text{CH}_3$ ), 1.12 (dd,  $^3J_{\text{PH}} = 12.9$  Hz,  $^3J_{\text{HH}} = 7.3$  Hz, 9H, *i*Pr- $\text{CH}_3$ ) ppm.

**$^1\text{H}\{^{31}\text{P}\}$  NMR** (500.1 MHz,  $\text{C}_6\text{D}_6$ , 298 K):  $\delta$  = 6.83 (s, 1H, Mes-CH), 6.80 (s, 1H, Mes-CH), 3.45 (s, 3H, Mes- $\text{CH}_3$ ), 2.42 (s, 3H, Mes- $\text{CH}_3$ ), 2.32 (sept,  $^3J_{\text{HH}} = 7.2$  Hz, 3H, *i*Pr-CH), 2.14 (s, 3H, Mes- $\text{CH}_3$ ), 1.47 (s, 3H, Aza- $\text{CH}_3$ ), 1.39 (s, 9H, *t*Bu- $\text{CH}_3$ ), 1.21 (s, 3H, Aza- $\text{CH}_3$ ) overlapping with 1.19 (d,  $^3J_{\text{HH}} = 7.3$  Hz, 9H, *i*Pr- $\text{CH}_3$ ), 1.12 (d,  $^3J_{\text{HH}} = 7.2$  Hz, 9H, *i*Pr- $\text{CH}_3$ ) ppm.

**$^{13}\text{C}\{^1\text{H}\}$  NMR** (125.8 MHz,  $\text{C}_6\text{D}_6$ , 298 K):  $\delta$  = 141.9 (s, Mes- $\text{C}_q$ ), 140.3 (s, Mes- $\text{C}_q$ ), 138.1 (s, Mes- $\text{C}_q$ ), 131.8 (Mes- $\text{C}_q$ , detected by HMBC), 128.4 (s, Mes-CH), 127.5 (s, Mes-CH), 102.7-102.6 (m, Aza- $\text{C}_q$ ), 64.1 (br s, Aza- $\text{C}_q$ ), 56.2 (d,  $^3J_{\text{PC}} = 1.7$  Hz, *t*Bu- $\text{C}_q$ ), 29.0 (d,  $^4J_{\text{PC}} = 2.9$  Hz, *t*Bu- $\text{CH}_3$ ), 27.2 (d,  $^4J_{\text{RhC}} = 0.6$  Hz, Mes- $\text{CH}_3$ ), 23.3 (dd,  $^1J_{\text{PC}} = 20.2$  Hz,  $^2J_{\text{RhC}} = 1.2$  Hz, *i*Pr-CH), 22.9 (s, Mes- $\text{CH}_3$ ), 21.3 (s, Mes- $\text{CH}_3$ ), 20.3 (d,  $^2J_{\text{PC}} = 1.8$  Hz, *i*Pr- $\text{CH}_3$ ), 19.5 (s, *i*Pr- $\text{CH}_3$ ), 16.1 (d,  $^2J_{\text{RhC}} = 1.2$  Hz, Aza- $\text{CH}_3$ ), 11.5 (s, Aza- $\text{CH}_3$ ) ppm.

**$^{13}\text{C}\{^1\text{H}, ^{31}\text{P}\}$  NMR** (75.5 MHz,  $\text{C}_6\text{D}_6$ , 298 K):  $\delta$  = 141.9 (s, Mes- $\text{C}_q$ ), 140.3 (s, Mes- $\text{C}_q$ ), 138.1 (s, Mes- $\text{C}_q$ ), 128.4 (s, Mes-CH), 127.5 (s, Mes-CH), 102.7-102.5 (m, Aza- $\text{C}_q$ ), 64.1 (br s, Aza- $\text{C}_q$ ), 56.2 (s, *t*Bu- $\text{C}_q$ ), 29.0 (s, *t*Bu- $\text{CH}_3$ ), 27.2 (d,  $^4J_{\text{RhC}} = 0.7$  Hz, Mes- $\text{CH}_3$ ), 23.3 (d,  $^2J_{\text{RhC}} = 1.3$  Hz, *i*Pr-CH), 22.9 (s, Mes- $\text{CH}_3$ ), 21.3 (s, Mes- $\text{CH}_3$ ), 20.3 (d,  $^3J_{\text{RhC}} = 0.6$  Hz, *i*Pr- $\text{CH}_3$ ), 19.5 (d,  $^3J_{\text{RhC}} = 0.5$  Hz, *i*Pr- $\text{CH}_3$ ), 16.1 (d,  $^2J_{\text{RhC}} = 1.3$  Hz, Aza- $\text{CH}_3$ ), 11.5 (s, Aza- $\text{CH}_3$ ) ppm.

*Comment: The broad singlet corresponding to the Mes- $\text{C}_q$  nucleus bound to the boron atom could not be observed in the  $^{13}\text{C}\{^1\text{H}, ^{31}\text{P}\}$  NMR spectrum.*

**$^{11}\text{B}$  NMR** (160.5 MHz,  $\text{C}_6\text{D}_6$ , 298 K):  $\delta$  = 20.3 (br s) ppm.

**$^{31}\text{P}\{^1\text{H}\}$  NMR** (202.5 MHz,  $\text{C}_6\text{D}_6$ , 298 K):  $\delta$  = 52.5 (d,  $^1J_{\text{RhP}} = 196$  Hz) ppm.

HRMS (LIFDI,  $\text{C}_{26}\text{H}_{47}\text{BClINPRh}$ ): *calcd*:  $m/z = 553.2277$ , *found*:  $m/z = 553.2278$ .

UV-vis (hexane):  $\lambda_{\text{abs}} = 252, 302, 399$  nm.

## Synthesis of 1e

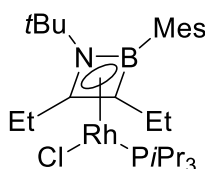

[{(COE) $_2$ RhCl] $_2$ ] (530 mg, 739  $\mu\text{mol}$ ) was suspended in pentane (12 mL) and treated with triisopropylphosphine (1.06 mL, 5.55 mmol). After stirring the suspension for 10 min, 3-hexyne (121 mg, 168  $\mu\text{L}$ , 1.48 mmol) was added. The reaction mixture was stirred for 10 min and all volatiles were removed *in vacuo*. The residue was dissolved in THF (10 mL) and treated with

a stock solution of (*tert*-butylimino)mesitylborane in heptane (1.54 mL, 2.96 mmol, 1.93 M). The reaction mixture was stirred for 15 h at room temperature and then all volatiles were removed *in vacuo*. The residue was washed with pentane (4 x 5 mL) and dried under reduced pressure to yield **1e** as an orange solid (526 mg, 904  $\mu$ mol, 61%). Crystals of **1e** suitable for X-ray diffraction were obtained by evaporation of a saturated hexane solution.

**$^1\text{H}$  NMR** (500.1 MHz,  $\text{C}_6\text{D}_6$ , 298 K):  $\delta$  = 6.84 (s, 1H, Mes-CH), 6.81 (s, 1H, Mes-CH), 3.50 (s, 3H, Mes-CH<sub>3</sub>), 2.45 (s, 3H, Mes-CH<sub>3</sub>), 2.41-2.33 (m, 3H, *i*Pr-CH), 2.26 (q,  $^3J_{\text{HH}} = 7.6$  Hz, 2H, Et-CH<sub>2</sub>), 2.16 (s, 3H, Mes-CH<sub>3</sub>), 1.66-1.54 (m, 2H, Et-CH<sub>2</sub>), 1.46 (s, 9H, *t*Bu-CH<sub>3</sub>), 1.25 (dd,  $^3J_{\text{PH}} = 13.7$  Hz,  $^3J_{\text{HH}} = 7.2$  Hz, 9H, *i*Pr-CH<sub>3</sub>), 1.18-1.13 (m, 12H, *i*Pr-CH<sub>3</sub> overlapping with Et-CH<sub>3</sub>), 1.03 (t,  $^3J_{\text{HH}} = 7.5$  Hz, 3H, Et-CH<sub>3</sub>) ppm.

**$^{13}\text{C}\{^1\text{H}\}$  NMR** (125.8 MHz,  $\text{C}_6\text{D}_6$ , 298 K):  $\delta$  = 141.6 (s, Mes-C<sub>q</sub>), 139.2 (s, Mes-C<sub>q</sub>), 137.9 (s, Mes-C<sub>q</sub>), 131.6 (br s, Mes-C<sub>q</sub>), 128.4 (s, Mes-CH), 127.5 (s, Mes-CH), 106.5-106.3 (m, Aza-C<sub>q</sub>), 68.2 (br s, Aza-C<sub>q</sub>), 56.8 (d,  $^3J_{\text{PC}} = 2.0$  Hz, *t*Bu-C<sub>q</sub>), 29.2 (d,  $^4J_{\text{PC}} = 2.8$  Hz, *t*Bu-CH<sub>3</sub>), 27.7 (d,  $^4J_{\text{RhC}} = 0.8$  Hz, Mes-CH<sub>3</sub>), 24.4 (d,  $^2J_{\text{RhC}} = 0.7$  Hz, Et-CH<sub>2</sub>), 23.9 (s, Mes-CH<sub>3</sub>), 23.8 (dd,  $^1J_{\text{PC}} = 19.8$  Hz,  $^2J_{\text{RhC}} = 1.3$  Hz, *i*Pr-CH), 21.3 (s, Mes-CH<sub>3</sub>), 20.6 (d,  $^2J_{\text{PC}} = 1.5$  Hz, *i*Pr-CH<sub>3</sub>), 20.0 (s, Et-CH<sub>2</sub>), 19.6 (s, *i*Pr-CH<sub>3</sub>), 14.8 (s, Et-CH<sub>3</sub>), 11.2 (d,  $^3J_{\text{RhC}} = 1.4$  Hz, Et-CH<sub>3</sub>) ppm.

**$^{11}\text{B}$  NMR** (160.5 MHz,  $\text{C}_6\text{D}_6$ , 298 K):  $\delta$  = 21.4 (br s) ppm.

**$^{31}\text{P}\{^1\text{H}\}$  NMR** (202.5 MHz,  $\text{C}_6\text{D}_6$ , 298 K):  $\delta$  = 50.0 (d,  $^1J_{\text{RhP}} = 196$  Hz) ppm.

HRMS (LIFDI,  $\text{C}_{28}\text{H}_{51}\text{BClINPRh}$ ): *calcd*:  $m/z = 581.2590$ , *found*:  $m/z = 581.2563$ .

UV-vis (hexane):  $\lambda_{\text{abs}} = 253, 298, 395$  nm.

## Synthesis of **1f**

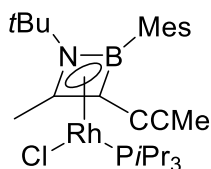

[{(COE)<sub>2</sub>RhCl]<sub>2</sub>] (815 mg, 1.14 mmol) was suspended in pentane (15 mL) and treated with triisopropylphosphine (1.63 mL, 8.53 mmol). After stirring the suspension for 15 min, 2,4-hexadiyne (178 mg, 2.28 mmol) was added. The reaction mixture was stirred for 15 min and all volatiles were removed *in vacuo*. The residue was dissolved in THF (15 mL) and treated with a stock solution of (*tert*-butylimino)mesitylborane in heptane (2.68 mL, 6.84 mmol,



2.55 M). After stirring the reaction mixture for 15 h at ambient temperature, all volatiles were removed *in vacuo*. The residue was washed with pentane (5 x 5 mL) and dried under reduced pressure to yield **1f** as an orange solid (936 mg, 1.62 mmol, 71%). Crystals of **1f** suitable for X-ray diffraction were obtained by evaporation of a saturated hexane/benzene (10:1) solution.

**<sup>1</sup>H NMR** (500.1 MHz, C<sub>6</sub>D<sub>6</sub>, 298 K):  $\delta$  = 6.82 (s, 1H, Mes-CH), 6.76 (s, 1H, Mes-CH), 3.45 (s, 3H, Mes-CH<sub>3</sub>), 2.75-2.67 (m, 3H, *i*Pr-CH), 2.63 (s, 3H, Mes-CH<sub>3</sub>), 2.11 (s, 3H, Mes-CH<sub>3</sub>), 1.64 (s, 3H, Aza-CH<sub>3</sub>), 1.44 (s, 3H, CCCH<sub>3</sub>) 1.35 (s, 9H, *t*Bu-CH<sub>3</sub>), 1.30-1.20 (m, 18H, *i*Pr-CH<sub>3</sub>) ppm.

**<sup>1</sup>H{<sup>31</sup>P} NMR** (500.1 MHz, C<sub>6</sub>D<sub>6</sub>, 298 K):  $\delta$  = 6.819-6.815 (m, 1H, Mes-CH), 6.76-6.75 (m, 1H, Mes-CH), 3.44 (s, 3H, Mes-CH<sub>3</sub>), 2.70 (sept, <sup>3</sup>J<sub>HH</sub> = 7.2 Hz, 3H, *i*Pr-CH), 2.63 (s, 3H, Mes-CH<sub>3</sub>), 2.11 (s, 3H, Mes-CH<sub>3</sub>), 1.637-1.636 (m, 3H, Aza-CH<sub>3</sub>), 1.44 (s, 3H, CCCH<sub>3</sub>), 1.34 (s, 9H, *t*Bu-CH<sub>3</sub>), 1.27 (d, <sup>3</sup>J<sub>HH</sub> = 7.2 Hz, 9H, *i*Pr-CH<sub>3</sub>), 1.22 (d, <sup>3</sup>J<sub>HH</sub> = 7.3 Hz, 9H, *i*Pr-CH<sub>3</sub>) ppm.

**<sup>13</sup>C{<sup>1</sup>H} NMR** (125.8 MHz, C<sub>6</sub>D<sub>6</sub>, 298 K):  $\delta$  = 141.7 (s, Mes-C<sub>q</sub>), 141.2 (s, Mes-C<sub>q</sub>), 138.5 (s, Mes-C<sub>q</sub>), 129.9 (Mes-C<sub>q</sub>, detected by HMBC), 128.4 (s, Mes-CH), 127.7 (s, Mes-CH), 102.7-102.6 (m, Aza-C<sub>q</sub>), 85.48-85.46 (m, CCCH<sub>3</sub>), 78.31-78.30 (m, CCCH<sub>3</sub>), 56.4 (d, <sup>3</sup>J<sub>PC</sub> = 1.7 Hz, *t*Bu-C<sub>q</sub>), 49.4 (br s, Aza-C<sub>q</sub>), 28.8 (d, <sup>4</sup>J<sub>PC</sub> = 2.8 Hz, *t*Bu-CH<sub>3</sub>), 27.0 (d, <sup>4</sup>J<sub>RhC</sub> = 0.5 Hz, Mes-CH<sub>3</sub>), 23.2 (s, Mes-CH<sub>3</sub>), 22.5 (dd, <sup>1</sup>J<sub>PC</sub> = 21.4 Hz, <sup>2</sup>J<sub>RhC</sub> = 1.0 Hz, *i*Pr-CH), 21.3 (s, Mes-CH<sub>3</sub>), 20.31-20.30 (m, *i*Pr-CH<sub>3</sub>), 19.5 (s, *i*Pr-CH<sub>3</sub>), 17.3 (d, <sup>2</sup>J<sub>RhC</sub> = 0.9 Hz, Aza-CH<sub>3</sub>), 4.6 (s, CCCH<sub>3</sub>) ppm.

*Comment: The spectrum contains a signal corresponding to residual benzene from the crystallization process at 128.59 ppm.*

**<sup>13</sup>C{<sup>1</sup>H, <sup>31</sup>P} NMR** (75.5 MHz, C<sub>6</sub>D<sub>6</sub>, 298 K):  $\delta$  = 141.7 (s, Mes-C<sub>q</sub>), 141.2 (s, Mes-C<sub>q</sub>), 138.5 (s, Mes-C<sub>q</sub>), 129.8 (br s, Mes-C<sub>q</sub>), 102.8-102.6 (m, Aza-C<sub>q</sub>), 85.5 (d, <sup>2</sup>J<sub>RhC</sub> = 0.6 Hz, CCCH<sub>3</sub>), 78.3 (d, <sup>3</sup>J<sub>RhC</sub> = 0.6 Hz, CCCH<sub>3</sub>), 56.4 (s, *t*Bu-C<sub>q</sub>), 49.5 (br s, Aza-C<sub>q</sub>), 28.8 (s, *t*Bu-CH<sub>3</sub>), 27.0 (d, <sup>4</sup>J<sub>RhC</sub> = 0.7 Hz, Mes-CH<sub>3</sub>), 23.2 (s, Mes-CH<sub>3</sub>), 22.5 (d, <sup>2</sup>J<sub>RhC</sub> = 1.2 Hz, *i*Pr-CH), 21.3 (s, Mes-CH<sub>3</sub>), 20.3 (d, <sup>3</sup>J<sub>RhC</sub> = 0.6 Hz, *i*Pr-CH<sub>3</sub>), 19.5 (d, <sup>3</sup>J<sub>RhC</sub> = 0.5 Hz, *i*Pr-CH<sub>3</sub>), 17.3 (d, <sup>2</sup>J<sub>RhC</sub> = 1.2 Hz, Aza-CH<sub>3</sub>), 4.6 (s, CCCH<sub>3</sub>) ppm.

*Comment: The broad singlet corresponding to the Mes-C<sub>q</sub> nucleus bound to the boron atom could not be observed in the <sup>13</sup>C{<sup>1</sup>H, <sup>31</sup>P} NMR spectrum. Due to overlapping with the signal of C<sub>6</sub>D<sub>6</sub>, the singlet of one Mes-CH nucleus could not be observed in the <sup>13</sup>C{<sup>1</sup>H, <sup>31</sup>P} NMR spectrum.*

**<sup>11</sup>B NMR** (160.5 MHz, C<sub>6</sub>D<sub>6</sub>, 298 K):  $\delta$  = 20.3 (br s) ppm.

**<sup>31</sup>P{<sup>1</sup>H} NMR** (202.5 MHz, C<sub>6</sub>D<sub>6</sub>, 298 K):  $\delta$  = 50.2 (d, <sup>1</sup>J<sub>RhP</sub> = 192 Hz) ppm.

HRMS (LIFDI, C<sub>28</sub>H<sub>47</sub>BClNPRh): *calcd*: m/z = 577.2277, *found*: m/z = 577.2253.

UV-vis (hexane):  $\lambda_{\text{abs}} = 267, 306, 387 \text{ nm}$ .

## Synthesis of **1g**

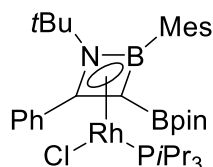

[(COE)<sub>2</sub>RhCl]<sub>2</sub>] (400 mg, 557  $\mu\text{mol}$ ) was suspended in pentane (12 mL) and treated with triisopropylphosphine (0.80 mL, 4.19 mmol). After stirring the suspension for 10 min, 4,4,5,5-tetramethyl-2-(2-phenylethynyl)-1,3,2-dioxaborolane (254 mg, 1.11 mmol) was added. The reaction mixture was stirred for 10 min and all volatiles were removed *in vacuo*. The residue was dissolved in THF (12 mL) and treated with a stock solution of (*tert*-butylimino)mesitylborane in heptane (1.16 mL, 2.22 mmol, 1.92 M). After stirring the reaction mixture for 15 h at ambient temperature, all volatiles were removed *in vacuo*. The residue was washed with pentane (7 x 5 mL) and dried under reduced pressure to yield **1g** as an orange solid (490 mg, 673  $\mu\text{mol}$ , 60%). Crystals of **1g** suitable for X-ray diffraction were obtained by evaporation of a saturated hexane solution.

<sup>1</sup>H NMR (500.1 MHz, C<sub>6</sub>D<sub>6</sub>, 298 K):  $\delta = 8.29\text{-}8.27$  (m, 2H, Ph-CH), 7.16-7.12 (m, 2H, Ph-CH), 7.10-7.07 (m, 1H, Ph-CH), 6.86 (s, 1H, Mes-CH), 6.81 (s, 1H, Mes-CH), 3.51 (s, 3H, Mes-CH<sub>3</sub>), 2.73 (s, 3H, Mes-CH<sub>3</sub>), 2.52-2.44 (m, 3H, *i*Pr-CH), 2.12 (s, 3H, Mes-CH<sub>3</sub>), 1.38-1.33 (m, 9H, *i*Pr-CH<sub>3</sub>) overlapping with 1.33 (s, 9H, *t*Bu-CH<sub>3</sub>), 1.11 (dd, <sup>3</sup>J<sub>PH</sub> = 13.4 Hz, <sup>3</sup>J<sub>HH</sub> = 7.3 Hz, 9H, *i*Pr-CH<sub>3</sub>), 0.96 (s, 6H, Bpin-CH<sub>3</sub>), 0.90 (s, 6H, Bpin-CH<sub>3</sub>) ppm.

<sup>13</sup>C{<sup>1</sup>H} NMR (125.8 MHz, C<sub>6</sub>D<sub>6</sub>, 298 K):  $\delta = 141.3$  (s, Mes-C<sub>q</sub>), 139.9 (s, Mes-C<sub>q</sub>), 138.0 (s, Mes-C<sub>q</sub>), 133.9 (d, <sup>2</sup>J<sub>RhC</sub> = 1.1 Hz, Ph-C<sub>q</sub>), 132.0 (s, Ph-CH), 131.9 (br s, Mes-C<sub>q</sub>), 129.4 (s, Ph-CH), 128.4 (s, Mes-CH), 127.6 (s, Mes-CH), 127.2 (s, Ph-CH), 107.1-107.0 (m, Aza-C<sub>q</sub>), 82.3 (s, Bpin-C<sub>q</sub>), 57.9 (d, <sup>3</sup>J<sub>PC</sub> = 1.3 Hz, *t*Bu-C<sub>q</sub>), 43.1 (br s, Aza-C<sub>q</sub>), 29.2 (d, <sup>4</sup>J<sub>PC</sub> = 2.7 Hz, *t*Bu-CH<sub>3</sub>), 27.2 (d, <sup>4</sup>J<sub>RhC</sub> = 0.6 Hz, Mes-CH<sub>3</sub>), 25.7 (d, <sup>1</sup>J<sub>PC</sub> = 20.9 Hz, *i*Pr-CH), 25.5 (s, Bpin-CH<sub>3</sub>), 25.0 (s, Bpin-CH<sub>3</sub>), 23.7 (s, Mes-CH<sub>3</sub>), 21.3 (s, Mes-CH<sub>3</sub>), 20.4 (s, *i*Pr-CH<sub>3</sub>), 19.5 (s, *i*Pr-CH<sub>3</sub>) ppm.

<sup>11</sup>B NMR (160.5 MHz, C<sub>6</sub>D<sub>6</sub>, 298 K):  $\delta = 33.1$  (br s, Bpin-B), 24.8 (br s, Aza-B) ppm.

$^{31}\text{P}\{^1\text{H}\}$  NMR (162.2 MHz,  $\text{C}_6\text{D}_6$ , 298 K):  $\delta = 57.2$  (d,  $^1J_{\text{RhP}} = 189$  Hz) ppm.

HRMS (LIFDI,  $\text{C}_{36}\text{H}_{58}\text{B}_2\text{ClINO}_2\text{PRh}$ ): *calc*:  $m/z = 727.3129$ , *found*:  $m/z = 727.3090$ .

UV-vis (hexane):  $\lambda_{\text{abs}} = 236$  (shoulder), 255, 398 nm.

## Synthesis of **1h**

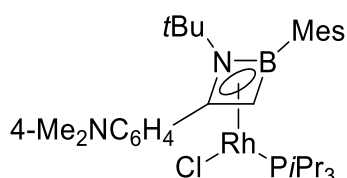

$[(\text{COE})_2\text{RhCl}]_2$  (208 mg, 290  $\mu\text{mol}$ ) was suspended in pentane (7 mL) and treated with triisopropylphosphine (0.42 mL, 2.20 mmol). After stirring the suspension for 10 min, 4-ethynyl-*N,N*-dimethylaniline (84.2 mg, 580  $\mu\text{mol}$ ) was added. The reaction mixture was stirred for 10 min and all volatiles were removed *in vacuo*. The residue was dissolved in THF (8 mL) and treated with a stock solution of (*tert*-butylimino)mesitylborane in heptane (0.59 mL, 1.16 mmol, 1.96 M). The reaction mixture was stirred for 15 h at ambient temperature and all volatiles were removed *in vacuo*. The residue was washed with pentane (5 x 4 mL) and dried under reduced pressure to yield **1h** as an orange solid (330 mg, 512  $\mu\text{mol}$ , 88%). Crystals of **1h** suitable for X-ray diffraction were obtained by evaporation of a saturated hexane/benzene (5:1) solution.

$^1\text{H}$  NMR (500.1 MHz,  $\text{C}_6\text{D}_6$ , 298 K):  $\delta = 7.97$ -7.94 (m, 2H, 4- $\text{Me}_2\text{NC}_6\text{H}_4$ -CH), 6.89 (s, 1H, Mes-CH), 6.88 (s, 1H, Mes-CH), 6.41-6.38 (m, 2H, 4- $\text{Me}_2\text{NC}_6\text{H}_4$ -CH), 3.47 (s, 3H, Mes- $\text{CH}_3$ ), 3.19 (s, 1H, Aza-CH), 2.78 (s, 3H, Mes- $\text{CH}_3$ ), 2.41 (s, 6H,  $\text{N}(\text{CH}_3)_2$ ), 2.25-2.18 (m, 3H, *iPr*-CH) overlapping with 2.18 (s, 3H, Mes- $\text{CH}_3$ ), 1.39 (s, 9H, *tBu*- $\text{CH}_3$ ), 1.15 (dd,  $^3J_{\text{PH}} = 13.8$  Hz,  $^3J_{\text{HH}} = 7.2$  Hz, 9H, *iPr*- $\text{CH}_3$ ), 0.96 (dd,  $^3J_{\text{PH}} = 13.2$  Hz,  $^3J_{\text{HH}} = 7.2$  Hz, 9H, *iPr*- $\text{CH}_3$ ) ppm.

$^{13}\text{C}\{^1\text{H}\}$  NMR (125.8 MHz,  $\text{C}_6\text{D}_6$ , 298 K):  $\delta = 151.0$  (s, 4- $\text{Me}_2\text{NC}_6\text{H}_4$ - $\text{C}_q$ ), 141.6 (s, Mes- $\text{C}_q$ ), 140.5 (s, Mes- $\text{C}_q$ ), 138.1 (s, Mes- $\text{C}_q$ ), 132.4 (s, 4- $\text{Me}_2\text{NC}_6\text{H}_4$ -CH), 132.0 (br s, Mes- $\text{C}_q$ ), 128.6 (s, Mes-CH), 127.7 (s, Mes-CH), 121.1 (d,  $^2J_{\text{RhC}} = 1.2$  Hz, 4- $\text{Me}_2\text{NC}_6\text{H}_4$ - $\text{C}_q$ ), 110.9 (s, 4- $\text{Me}_2\text{NC}_6\text{H}_4$ -CH), 106.1-106.0 (m, Aza- $\text{C}_q$ ), 57.0 (d,  $^3J_{\text{PC}} = 1.1$  Hz, *tBu*- $\text{C}_q$ ), 50.7 (br s, Aza-CH), 39.6 (s,  $\text{N}(\text{CH}_3)_2$ ), 29.6 (d,  $^4J_{\text{PC}} = 2.8$  Hz, *tBu*- $\text{CH}_3$ ), 26.9 (d,  $^4J_{\text{RhC}} = 0.5$  Hz, Mes- $\text{CH}_3$ ), 25.1 (dd,  $^1J_{\text{PC}} = 20.8$  Hz,  $^2J_{\text{RhC}} = 1.2$  Hz, *iPr*-CH), 24.0 (s, Mes- $\text{CH}_3$ ), 21.4 (s, Mes- $\text{CH}_3$ ), 20.10-20.09 (m, *iPr*- $\text{CH}_3$ ), 19.2 (s, *iPr*- $\text{CH}_3$ ) ppm.

$^{11}\text{B}$  NMR (128.5 MHz,  $\text{C}_6\text{D}_6$ , 298 K):  $\delta = 21.4$  (br s) ppm.

$^{31}\text{P}\{^1\text{H}\}$  NMR (202.5 MHz,  $\text{C}_6\text{D}_6$ , 298 K):  $\delta = 59.6$  (d,  $^1J_{\text{RhP}} = 196$  Hz) ppm.

HRMS (LIFDI,  $\text{C}_{32}\text{H}_{52}\text{BClN}_2\text{PRh}$ ): *calc*:  $m/z = 644.2699$ , *found*:  $m/z = 644.2689$ .

UV-vis (hexane):  $\lambda_{\text{abs}} = 248, 304, 399$  nm.

## Synthesis of **1i**

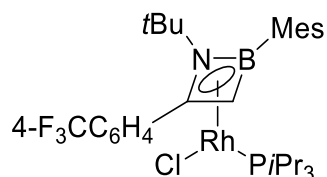

$[\{(\text{COE})_2\text{RhCl}\}_2]$  (233 mg, 325  $\mu\text{mol}$ ) was suspended in pentane (7 mL) and treated with triisopropylphosphine (0.47 mL, 2.46 mmol). After stirring the suspension for 10 min, a solution of 4-ethynyl- $\alpha,\alpha,\alpha$ -trifluorotoluene (111 mg, 106  $\mu\text{L}$ , 650  $\mu\text{mol}$ ) in pentane (2 mL) was added. The reaction mixture was stirred for 10 min and all volatiles were removed *in vacuo*. The residue was dissolved in THF (8 mL) and treated with a stock solution of (*tert*-butylimino)mesitylborane in heptane (0.67 mL, 1.31 mmol, 1.96 M). The reaction mixture was stirred for 15 h at room temperature and all volatiles were removed *in vacuo*. The residue was washed with pentane (5 x 4 mL) and dried under reduced pressure to yield **1i** as an orange solid (357 mg, 533  $\mu\text{mol}$ , 82%). Crystals of **1i** suitable for X-ray diffraction were obtained by evaporation of a saturated hexane/benzene (5:1) solution.

$^1\text{H}$  NMR (500.1 MHz,  $\text{C}_6\text{D}_6$ , 298 K):  $\delta = 7.95$  (d,  $^3J_{\text{HH}} = 8.1$  Hz, 2H,  $4\text{-F}_3\text{CC}_6\text{H}_4\text{-CH}$ ), 7.26 (d,  $^3J_{\text{HH}} = 8.2$  Hz, 2H,  $4\text{-F}_3\text{CC}_6\text{H}_4\text{-CH}$ ), 6.89 (s, 1H, Mes-CH), 6.85 (s, 1H, Mes-CH), 3.37 (s, 3H, Mes-CH<sub>3</sub>), 3.01 (s, 1H, Aza-CH), 2.69 (s, 3H, Mes-CH<sub>3</sub>), 2.17 (s, 3H, Mes-CH<sub>3</sub>) overlapping with 2.17-2.08 (m, 3H, *i*Pr-CH), 1.22 (s, 9H, *t*Bu-CH<sub>3</sub>), 1.05 (dd,  $^3J_{\text{PH}} = 14.0$  Hz,  $^3J_{\text{HH}} = 7.2$  Hz, 9H, *i*Pr-CH<sub>3</sub>), 0.83 (dd,  $^3J_{\text{PH}} = 13.4$  Hz,  $^3J_{\text{HH}} = 7.2$  Hz, 9H, *i*Pr-CH<sub>3</sub>) ppm.

$^{13}\text{C}\{^1\text{H}\}$  NMR (125.8 MHz,  $\text{C}_6\text{D}_6$ , 298 K):  $\delta = 141.4$  (s, Mes-C<sub>q</sub>), 140.4 (s, Mes-C<sub>q</sub>), 138.6 (s, Mes-C<sub>q</sub>), 138.28-138.26 (m,  $4\text{-F}_3\text{CC}_6\text{H}_4\text{-C}_q$ ), 131.8 (s,  $4\text{-F}_3\text{CC}_6\text{H}_4\text{-CH}$ ) overlapping with 131.4 (q,  $^2J_{\text{CF}} = 32.5$  Hz,  $4\text{-F}_3\text{CC}_6\text{H}_4\text{-C}_q$ ), 131.1 (Mes-C<sub>q</sub>, detected by HMBC), 128.7 (s, Mes-CH), 127.8 (s, Mes-CH), 124.9 (q,  $^3J_{\text{CF}} = 3.7$  Hz,  $4\text{-F}_3\text{CC}_6\text{H}_4\text{-CH}$ ), 124.6 (q,  $^1J_{\text{CF}} = -272.4$  Hz, CF<sub>3</sub>), 102.9-102.8 (m, Aza-C<sub>q</sub>), 57.3 (d,  $^3J_{\text{PC}} = 1.2$  Hz, *t*Bu-C<sub>q</sub>), 49.1 (br s, Aza-CH), 29.5 (d,  $^4J_{\text{PC}} = 2.8$  Hz, *t*Bu-CH<sub>3</sub>), 26.9 (d,  $^4J_{\text{RhC}} = 0.5$  Hz, Mes-CH<sub>3</sub>), 25.0 (dd,  $^1J_{\text{PC}} = 21.3$  Hz,  $^2J_{\text{RhC}} = 1.2$  Hz,

*i*Pr-CH), 23.9 (s, Mes-CH<sub>3</sub>), 21.3 (s, Mes-CH<sub>3</sub>), 20.03-20.02 (m, *i*Pr-CH<sub>3</sub>), 19.0 (s, *i*Pr-CH<sub>3</sub>) ppm.

*Comment: The spectrum contains signals corresponding to residual THF at 67.83 and 25.82 ppm.*

<sup>11</sup>B NMR (160.5 MHz, C<sub>6</sub>D<sub>6</sub>, 298 K): δ = 21.2 (br s) ppm.

<sup>19</sup>F NMR (470.6 MHz, C<sub>6</sub>D<sub>6</sub>, 298 K): δ = -62.5 (s) ppm.

<sup>31</sup>P{<sup>1</sup>H} NMR (202.5 MHz, C<sub>6</sub>D<sub>6</sub>, 298 K): δ = 60.1 (d, <sup>1</sup>J<sub>RhP</sub> = 195 Hz) ppm.

HRMS (LIFDI, C<sub>31</sub>H<sub>46</sub>BClF<sub>3</sub>NPRh): *calcd*: m/z = 669.2151, *found*: m/z = 669.2141.

UV-vis (hexane): λ<sub>abs</sub> = 231 (shoulder), 302 (shoulder), 408 nm.

## Synthesis of **1j**

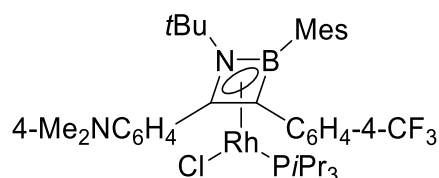

[(COE)<sub>2</sub>RhCl]<sub>2</sub> (216 mg, 301 μmol) was suspended in pentane (10 mL) and treated with triisopropylphosphine (0.43 mL, 2.25 mmol). After stirring the suspension for 10 min, *N,N*-dimethyl-4-{2-[4-trifluoromethyl]phenyl}ethynyl}benzenamine (174 mg, 602 μmol) was added. The reaction mixture was stirred for 10 min and all volatiles were removed *in vacuo*. The residue was dissolved in THF (10 mL) and treated with a stock solution of (*tert*-butylimino)mesitylborane in heptane (0.77 mL, 1.51 mmol, 1.96 M). After stirring the reaction mixture for 15 h at room temperature, all volatiles were removed *in vacuo*. The residue was washed with pentane (5 x 4 mL) and dried under reduced pressure to yield **1j** as an orange solid (380 mg, 482 μmol, 80%). Crystals of **1j** suitable for X-ray diffraction were obtained by evaporation of a saturated hexane/benzene (2:1) solution.

<sup>1</sup>H NMR (500.1 MHz, d<sub>8</sub>-THF, 298 K): δ = 8.30 (br s, 1H, 4-Me<sub>2</sub>NC<sub>6</sub>H<sub>4</sub>-CH), 7.55 (br s, 1H, 4-Me<sub>2</sub>NC<sub>6</sub>H<sub>4</sub>-CH), 7.24 (br s, 2H, 4-F<sub>3</sub>CC<sub>6</sub>H<sub>4</sub>-CH), 7.15 (br s, 1H, 4-F<sub>3</sub>CC<sub>6</sub>H<sub>4</sub>-CH), 6.97 (br s, 1H, 4-F<sub>3</sub>CC<sub>6</sub>H<sub>4</sub>-CH), 6.88-6.83 (m, 4H, Mes-CH overlapping with 4-Me<sub>2</sub>NC<sub>6</sub>H<sub>4</sub>-CH), 3.21 (s, 3H, Mes-CH<sub>3</sub>), 3.05 (s, 6H, N(CH<sub>3</sub>)<sub>2</sub>), 2.35 (s, 3H, Mes-CH<sub>3</sub>), 2.27 (s, 3H, Mes-CH<sub>3</sub>), 1.90-1.83 (m, 3H, *i*Pr-CH), 1.19 (s, 9H, *t*Bu-CH<sub>3</sub>), 1.15 (dd, <sup>3</sup>J<sub>PH</sub> = 13.7 Hz, <sup>3</sup>J<sub>HH</sub> = 7.2 Hz, 9H, *i*Pr-CH<sub>3</sub>), 1.04 (dd, <sup>3</sup>J<sub>PH</sub> = 13.1 Hz, <sup>3</sup>J<sub>HH</sub> = 7.3 Hz, 9H, *i*Pr-CH<sub>3</sub>) ppm.

**$^{13}\text{C}\{^1\text{H}\}$  NMR** (125.8 MHz,  $d_8$ -THF, 298 K):  $\delta$  = 152.2 (s, 4-Me<sub>2</sub>NC<sub>6</sub>H<sub>4</sub>-C<sub>q</sub>), 145.37-145.34 (m, 4-F<sub>3</sub>CC<sub>6</sub>H<sub>4</sub>-C<sub>q</sub>), 141.8 (s, Mes-C<sub>q</sub>), 140.7 (s, Mes-C<sub>q</sub>), 139.0 (s, Mes-C<sub>q</sub>), 134.4 (br s, 4-Me<sub>2</sub>NC<sub>6</sub>H<sub>4</sub>-CH), 131.5 (br s, Mes-C<sub>q</sub>), 130.8 (br s, 4-F<sub>3</sub>CC<sub>6</sub>H<sub>4</sub>-CH overlapping with 4-Me<sub>2</sub>NC<sub>6</sub>H<sub>4</sub>-CH), 128.8 (s, Mes-CH), 128.3 (s, Mes-CH), 127.1 (q,  $^2J_{\text{CF}} = 32.0$  Hz, 4-F<sub>3</sub>CC<sub>6</sub>H<sub>4</sub>-C<sub>q</sub>), 127.0 (br s, 4-F<sub>3</sub>CC<sub>6</sub>H<sub>4</sub>-CH), 125.7 (q,  $^1J_{\text{CF}} = -271.3$  Hz, CF<sub>3</sub>), 125.6 (br s, 4-F<sub>3</sub>CC<sub>6</sub>H<sub>4</sub>-CH), 125.2 (br s, 4-F<sub>3</sub>CC<sub>6</sub>H<sub>4</sub>-CH), 119.1 (d,  $^2J_{\text{RhC}} = 0.7$  Hz, 4-Me<sub>2</sub>NC<sub>6</sub>H<sub>4</sub>-C<sub>q</sub>), 111.7 (s, 4-Me<sub>2</sub>NC<sub>6</sub>H<sub>4</sub>-CH), 101.6-101.5 (m, Aza-C<sub>q</sub>), 63.8 (br s, Aza-C<sub>q</sub>), 58.0 (d,  $^3J_{\text{PC}} = 1.6$  Hz, *t*Bu-C<sub>q</sub>), 40.1 (s, N(CH<sub>3</sub>)<sub>2</sub>), 29.3 (d,  $^4J_{\text{PC}} = 2.8$  Hz, *t*Bu-CH<sub>3</sub>), 27.3 (s, Mes-CH<sub>3</sub>), 23.8 (dd,  $^1J_{\text{PC}} = 20.9$  Hz,  $^2J_{\text{RhC}} = 0.8$  Hz, *i*Pr-CH), 22.9 (s, Mes-CH<sub>3</sub>), 21.4 (s, Mes-CH<sub>3</sub>), 20.2 (s, *i*Pr-CH<sub>3</sub>), 19.6 (s, *i*Pr-CH<sub>3</sub>) ppm.

**$^{11}\text{B}$  NMR** (128.5 MHz,  $d_8$ -THF, 298 K):  $\delta$  = 22.4 (br s) ppm.

**$^{19}\text{F}$  NMR** (470.6 MHz,  $d_8$ -THF, 298 K):  $\delta$  = -63.5 (s) ppm.

**$^{31}\text{P}\{^1\text{H}\}$  NMR** (162.2 MHz,  $d_8$ -THF, 298 K):  $\delta$  = 48.4 (d,  $^1J_{\text{RhP}} = 189$  Hz) ppm.

**$^1\text{H}$  NMR** (500.1 MHz,  $d_8$ -THF, 233 K):  $\delta$  = 8.27-8.25 (m, 1H, 4-Me<sub>2</sub>NC<sub>6</sub>H<sub>4</sub>-CH), 7.55-7.53 (m, 1H, 4-Me<sub>2</sub>NC<sub>6</sub>H<sub>4</sub>-CH), 7.31 (d,  $^3J_{\text{HH}} = 8.2$  Hz, 1H, 4-F<sub>3</sub>CC<sub>6</sub>H<sub>4</sub>-CH), 7.28 (d,  $^3J_{\text{HH}} = 8.4$  Hz, 1H, 4-F<sub>3</sub>CC<sub>6</sub>H<sub>4</sub>-CH), 7.12 (d,  $^3J_{\text{HH}} = 8.2$  Hz, 1H, 4-F<sub>3</sub>CC<sub>6</sub>H<sub>4</sub>-CH), 6.96 (d,  $^3J_{\text{HH}} = 8.2$  Hz, 1H, 4-F<sub>3</sub>CC<sub>6</sub>H<sub>4</sub>-CH), 6.90-6.89 (m, 2H, Mes-CH, 4-Me<sub>2</sub>NC<sub>6</sub>H<sub>4</sub>-CH), 6.84 (s, 1H, Mes-CH), 6.79-6.77 (m, 1H, 4-Me<sub>2</sub>NC<sub>6</sub>H<sub>4</sub>-CH), 3.19 (s, 3H, Mes-CH<sub>3</sub>), 3.07 (s, 6H, N(CH<sub>3</sub>)<sub>2</sub>), 2.34 (s, 3H, Mes-CH<sub>3</sub>), 2.28 (s, 3H, Mes-CH<sub>3</sub>), 1.17 (s, 9H, *t*Bu-CH<sub>3</sub>) overlapping with 1.04 (br s, 18H, *i*Pr-CH<sub>3</sub>) ppm.

*Comment: The signal for the iPr-CH nucleus could not be observed due to overlapping with several signals.*

**$^{13}\text{C}\{^1\text{H}\}$  NMR** (125.8 MHz,  $d_8$ -THF, 233 K):  $\delta$  = 151.8 (s, 4-Me<sub>2</sub>NC<sub>6</sub>H<sub>4</sub>-C<sub>q</sub>), 145.29-145.25 (m, 4-F<sub>3</sub>CC<sub>6</sub>H<sub>4</sub>-C<sub>q</sub>), 141.6 (s, Mes-C<sub>q</sub>), 140.8 (s, Mes-C<sub>q</sub>), 138.9 (s, Mes-C<sub>q</sub>), 134.1-134.0 (m, 4-Me<sub>2</sub>NC<sub>6</sub>H<sub>4</sub>-CH), 131.3 (br s, Mes-C<sub>q</sub>), 130.6 (s, 4-F<sub>3</sub>CC<sub>6</sub>H<sub>4</sub>-CH), 130.5 (s, 4-Me<sub>2</sub>NC<sub>6</sub>H<sub>4</sub>-CH), 128.8 (s, Mes-CH), 128.3 (s, Mes-CH), 126.9 (s, 4-F<sub>3</sub>CC<sub>6</sub>H<sub>4</sub>-CH), 126.7 (q,  $^2J_{\text{CF}} = 31.9$  Hz, 4-F<sub>3</sub>CC<sub>6</sub>H<sub>4</sub>-C<sub>q</sub>), 125.77-125.72 (m, 4-F<sub>3</sub>CC<sub>6</sub>H<sub>4</sub>-CH), 125.7 (q,  $^1J_{\text{CF}} = -271.3$  Hz, CF<sub>3</sub>), 125.29-125.24 (m, 4-F<sub>3</sub>CC<sub>6</sub>H<sub>4</sub>-CH), 118.6 (s, 4-Me<sub>2</sub>NC<sub>6</sub>H<sub>4</sub>-C<sub>q</sub>), 111.6 (s, 4-Me<sub>2</sub>NC<sub>6</sub>H<sub>4</sub>-CH), 111.4 (s, 4-Me<sub>2</sub>NC<sub>6</sub>H<sub>4</sub>-CH), 101.6-101.5 (m, Aza-C<sub>q</sub>), 63.74-63.66 (m, Aza-C<sub>q</sub>), 57.8 (d,  $^3J_{\text{PC}} = 1.0$  Hz, *t*Bu-C<sub>q</sub>), 40.1 (s, N(CH<sub>3</sub>)<sub>2</sub>), 29.02-29.01 (m, *t*Bu-CH<sub>3</sub>), 27.2 (s, Mes-CH<sub>3</sub>), 23.6 (br s, *i*Pr-CH), 23.0 (s, Mes-CH<sub>3</sub>), 21.5 (s, Mes-CH<sub>3</sub>), 19.4 (br s, *i*Pr-CH<sub>3</sub>) ppm.

HRMS (LIFDI, C<sub>39</sub>H<sub>55</sub>BClF<sub>3</sub>N<sub>2</sub>PRh): *calcd*:  $m/z = 788.2886$ , *found*:  $m/z = 788.2868$ .

UV-vis (hexane):  $\lambda_{\text{abs}} = 269, 312, 395$  nm.

## Synthesis of **I**

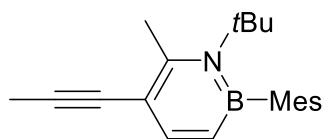

**I** (936 mg, 1.62 mmol) was dissolved in benzene (12 mL) and the argon atmosphere was replaced by acetylene. After stirring the reaction mixture for 1.5 h at 86 °C, all volatiles were removed *in vacuo*. The residue was purified by column chromatography on silica gel with a mixture of dichloromethane and hexane (1:10) as eluent. Evaporation of the solvent from the second fraction yielded pure **I** as a white solid (360 mg, 1.18 mmol, 73%). Crystals of **I** suitable for X-ray diffraction were obtained by evaporation of a saturated hexane/dichloromethane (10:1) solution (crystal data **Ia**) or by evaporation of a saturated pentane/ether (10:1) solution (crystal data **Ib**).

<sup>1</sup>H NMR (500.1 MHz, C<sub>6</sub>D<sub>6</sub>, 298 K):  $\delta$  = 7.76 (d, <sup>3</sup>J<sub>HH</sub> = 10.9 Hz, 1H, Aza1-CH), 6.84 (m, 2H, Mes-CH), 6.54 (d, <sup>3</sup>J<sub>HH</sub> = 10.9 Hz, 1H, Aza1-CH), 2.78 (s, 3H, Aza1-CH<sub>3</sub>), 2.25 (s, 3H, Mes-CH<sub>3</sub>), 2.21 (s, 6H, Mes-CH<sub>3</sub>), 1.81 (s, 3H, CCCH<sub>3</sub>), 1.30 (s, 9H, *t*Bu-CH<sub>3</sub>) ppm.

<sup>13</sup>C{<sup>1</sup>H} NMR (125.8 MHz, C<sub>6</sub>D<sub>6</sub>, 298 K):  $\delta$  = 150.2 (s, Aza1-C<sub>q</sub>), 147.3 (br s, Mes-C<sub>q</sub>), 145.6 (s, Aza1-CH), 136.7 (s, Mes-C<sub>q</sub>), 135.6 (s, Mes-C<sub>q</sub>), 131.9 (br s, Aza1-CH), 127.8 (s, Mes-CH), 111.9 (s, Aza1-C<sub>q</sub>), 88.3 (s, CCCH<sub>3</sub>), 81.1 (s, CCCH<sub>3</sub>), 61.7 (s, *t*Bu-C<sub>q</sub>), 34.5 (s, *t*Bu-CH<sub>3</sub>), 25.1 (s, Aza1-CH<sub>3</sub>), 23.9 (s, Mes-CH<sub>3</sub>), 21.3 (s, Mes-CH<sub>3</sub>), 4.4 (s, CCCH<sub>3</sub>) ppm.

<sup>11</sup>B NMR (160.5 MHz, C<sub>6</sub>D<sub>6</sub>, 298 K):  $\delta$  = 39.0 (br s) ppm.

Elemental analysis: % *calc*: C 82.63, H 9.25, N 4.59; *found*: C 82.40, H 9.36, N 4.68.

HRMS (ASAP, C<sub>21</sub>H<sub>28</sub>BN + H): *calcd*: m/z = 306.2388, *found*: m/z = 306.2377.

## Synthesis of **1k**

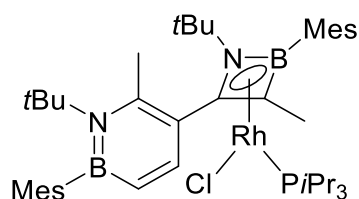

[[ $(\text{COE})_2\text{RhCl}$ ] $_2$ ] (70.0 mg, 97.6  $\mu\text{mol}$ ) was suspended in pentane (7 mL) and treated with trisopropylphosphine (0.14 mL, 73.3  $\mu\text{mol}$ ). After stirring the suspension for 10 min, 1-(*tert*-butyl)-2-mesityl-6-methyl-5-(prop-1-yn-1-yl)-1,2-azaborinine (59.5 mg, 195  $\mu\text{mol}$ ) was added. The reaction mixture was stirred for 10 min and all volatiles were removed *in vacuo*. The residue was dissolved in THF (8 mL) and treated with a stock solution of (*tert*-butylimino)mesitylborane in heptane (0.20 mL, 386  $\mu\text{mol}$ , 1.93 M). The reaction mixture was stirred for 15 h at room temperature and all volatiles were removed *in vacuo*. The residue was washed with pentane (4 x 3 mL) and dried under reduced pressure to yield **1k** as an orange solid (128 mg, 159  $\mu\text{mol}$ , 82%). Crystals of **1k** suitable for X-ray diffraction were obtained by evaporation of a saturated hexane/benzene (5:1) solution.

**$^1\text{H}$  NMR** (500.1 MHz,  $\text{C}_6\text{D}_6$ , 298 K):  $\delta$  = 9.34 (d,  $^3J_{\text{HH}}$  = 11.1 Hz, 1H, Aza1-CH), 6.91 (s, 1H, Mes-CH), 6.88 (s, 1H, Mes-CH), 6.867-6.866 (m, 2H, Mes-CH), 6.61 (d,  $^3J_{\text{HH}}$  = 11.1 Hz, 1H, Aza1-CH), 3.57 (s, 3H, Mes- $\text{CH}_3$ ), 2.82 (s, 3H, Aza1- $\text{CH}_3$ ), 2.67 (s, 3H, Mes- $\text{CH}_3$ ), 2.43-2.36 (m, 3H, *i*Pr-CH), 2.27 (s, 3H, Mes- $\text{CH}_3$ ), 2.24 (s, 3H, Mes- $\text{CH}_3$ ), 2.20 (s, 3H, Mes- $\text{CH}_3$ ), 2.18 (s, 3H, Mes- $\text{CH}_3$ ), 1.43 (s, 9H, *t*Bu- $\text{CH}_3$ ), 1.38-1.37 (m, 3H, Aza- $\text{CH}_3$ ) overlapping with 1.37 (s, 9H, *t*Bu- $\text{CH}_3$ ), 1.20 (dd,  $^3J_{\text{PH}}$  = 13.5 Hz,  $^3J_{\text{HH}}$  = 7.2 Hz, 9H, *i*Pr- $\text{CH}_3$ ), 1.05 (dd,  $^3J_{\text{PH}}$  = 13.0 Hz,  $^3J_{\text{HH}}$  = 7.3 Hz, 9H, *i*Pr- $\text{CH}_3$ ) ppm.

**$^{13}\text{C}\{^1\text{H}\}$  NMR** (125.8 MHz,  $\text{C}_6\text{D}_6$ , 298 K):  $\delta$  = 148.2 (s, Aza1-CH), 146.8 (br s, Mes- $\text{C}_q$ ), 146.1 (s, Aza1- $\text{C}_q$ ), 142.3 (s, Mes- $\text{C}_q$ ), 140.6 (s, Mes- $\text{C}_q$ ), 138.2 (s, Mes- $\text{C}_q$ ), 136.8 (s, Mes- $\text{C}_q$ ), 136.6 (s, Mes- $\text{C}_q$ ), 135.9 (s, Mes- $\text{C}_q$ ), 131.4 (br s, Mes- $\text{C}_q$ ), 130.5 (br s, Aza1-CH), 128.8 (s, Mes-CH), 128.0 (s, Mes-CH), 127.9 (s, Mes-CH), 127.8 (s, Mes-CH), 118.0 (d,  $^2J_{\text{RhC}}$  = 0.7 Hz, Aza1- $\text{C}_q$ ), 105.8-105.6 (m, Aza- $\text{C}_q$ ), 68.0 (br s, Aza- $\text{C}_q$ ), 61.7 (s, *t*Bu- $\text{C}_q$ ), 57.0 (d,  $^3J_{\text{PC}}$  = 1.5 Hz, *t*Bu- $\text{C}_q$ ), 34.6 (s, *t*Bu- $\text{CH}_3$ ), 29.6 (d,  $^4J_{\text{PC}}$  = 2.8 Hz, *t*Bu- $\text{CH}_3$ ), 27.7 (s, Mes- $\text{CH}_3$ ), 24.2 (s, Aza1- $\text{CH}_3$ ), 23.9 (s, Mes- $\text{CH}_3$ ), 23.6 (s, Mes- $\text{CH}_3$ ), 23.3 (s, Mes- $\text{CH}_3$ ) overlapping with 23.3-23.2 (m, *i*Pr-CH), 21.3 (s, Mes- $\text{CH}_3$ ), 21.3 (s, Mes- $\text{CH}_3$ ), 19.871-19.866 (m, *i*Pr- $\text{CH}_3$ ), 19.3 (s, *i*Pr- $\text{CH}_3$ ), 13.8 (s, Aza- $\text{CH}_3$ ) ppm.

**$^{11}\text{B}$  NMR** (128.5 MHz,  $\text{C}_6\text{D}_6$ , 298 K):  $\delta$  = 39.2 (br s, Aza1-B), 20.3 (br s, Aza-B) ppm.

**$^{31}\text{P}\{^1\text{H}\}$  NMR** (202.5 MHz,  $\text{C}_6\text{D}_6$ , 298 K):  $\delta$  = 49.7 (d,  $^1J_{\text{RhP}}$  = 194 Hz) ppm.

HRMS (LIFDI,  $\text{C}_{43}\text{H}_{69}\text{B}_2\text{ClN}_2\text{PRh}$ ): *calcd*:  $m/z$  = 804.4123, *found*:  $m/z$  = 804.4110.

UV-vis (hexane):  $\lambda_{\text{abs}}$  = 254, 299 (shoulder), 413 nm.



## Synthesis of **11**

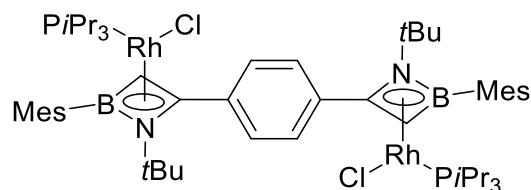

[[{(COE)<sub>2</sub>RhCl}]<sub>2</sub>] (500 mg, 697 μmol) was suspended in pentane (12 mL) and treated with triisopropylphosphine (1.00 mL, 5.24 mmol). After stirring the suspension for 15 min, 1,4-diethynylbenzene (87.9 mg, 697 μmol) was added. The reaction mixture was stirred for 15 min and all volatiles were removed *in vacuo*. The residue was suspended in THF (20 mL) and treated with a stock solution of (*tert*-butylimino)mesitylborane in heptane (1.43 mL, 2.79 mmol, 1.96 M). The reaction mixture was stirred for 15 h at ambient temperature and then all volatiles were removed *in vacuo*. After washing the residue with pentane (5 x 7 mL) and benzene (2 x 3 mL), residual solvent was removed under reduced pressure to yield **11** as an orange solid (243 mg, 216 μmol, 31%). Crystals of **11** suitable for X-ray diffraction were obtained by slow evaporation of a saturated benzene solution.

<sup>1</sup>H NMR (500.1 MHz, C<sub>6</sub>D<sub>6</sub>, 298 K): δ = 7.95 (s, 4H, C<sub>6</sub>H<sub>4</sub>-CH), 6.91 (s, 2H, Mes-CH), 6.88 (s, 2H, Mes-CH), 3.42 (s, 6H, Mes-CH<sub>3</sub>), 3.09 (s, 2H, Aza-CH), 2.75 (s, 6H, Mes-CH<sub>3</sub>), 2.24-2.16 (m, 6H, *i*Pr-CH) overlapping with 2.19 (s, 6H, Mes-CH<sub>3</sub>) 1.31 (s, 18H, *t*Bu-CH<sub>3</sub>), 1.12 (dd, <sup>3</sup>J<sub>PH</sub> = 14.0 Hz, <sup>3</sup>J<sub>HH</sub> = 7.2 Hz, 18H, *i*Pr-CH<sub>3</sub>), 0.91 (dd, <sup>3</sup>J<sub>PH</sub> = 13.4 Hz, <sup>3</sup>J<sub>HH</sub> = 7.3 Hz, 18H, *i*Pr-CH<sub>3</sub>) ppm.

<sup>13</sup>C{<sup>1</sup>H} NMR (125.8 MHz, C<sub>6</sub>D<sub>6</sub>, 298 K): δ = 141.5 (s, Mes-C<sub>q</sub>), 140.5 (s, Mes-C<sub>q</sub>), 138.6 (s, Mes-C<sub>q</sub>), 135.6 (d, <sup>2</sup>J<sub>RhC</sub> = 0.9 Hz, C<sub>6</sub>H<sub>4</sub>-C<sub>q</sub>), 131.4 (Mes-C<sub>q</sub>, detected by HMBC), 130.8 (s, C<sub>6</sub>H<sub>4</sub>-CH), 128.7 (s, Mes-CH), 127.8 (Mes-CH, detected by HSQC), 103.8-103.7 (m, Aza-C<sub>q</sub>), 57.3 (d, <sup>3</sup>J<sub>PC</sub> = 1.2 Hz, *t*Bu-C<sub>q</sub>), 49.4 (br s, Aza-CH), 29.6 (d, <sup>4</sup>J<sub>PC</sub> = 2.7 Hz, *t*Bu-CH<sub>3</sub>), 26.9 (s, Mes-CH<sub>3</sub>), 25.1 (d, <sup>1</sup>J<sub>PC</sub> = 21.1 Hz, *i*Pr-CH), 24.0 (s, Mes-CH<sub>3</sub>), 21.3 (s, Mes-CH<sub>3</sub>), 20.1 (d, <sup>2</sup>J<sub>PC</sub> = 0.9 Hz, *i*Pr-CH<sub>3</sub>), 19.2 (s, *i*Pr-CH<sub>3</sub>) ppm.

<sup>11</sup>B NMR (128.4 MHz, C<sub>6</sub>D<sub>6</sub>, 298 K): δ = 20.5 (br s, 2 B) ppm.

<sup>31</sup>P{<sup>1</sup>H} NMR (162.0 MHz, C<sub>6</sub>D<sub>6</sub>, 298 K): δ = 60.3 (d, <sup>1</sup>J<sub>RhP</sub> = 196 Hz, 2 P) ppm.

HRMS (LIFDI, C<sub>54</sub>H<sub>88</sub>B<sub>2</sub>Cl<sub>2</sub>N<sub>2</sub>P<sub>2</sub>Rh<sub>2</sub>): *calcd*: m/z = 1124.4090, *found*: m/z = 1124.4094.

UV-vis (THF): λ<sub>abs</sub> = 242, 304 (shoulder), 409 nm.

## Synthesis of 2a

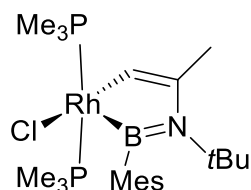

**1a** (280 mg, 519  $\mu\text{mol}$ ) was dissolved in benzene (12 mL) and treated with a stock solution of trimethylphosphine in benzene (1.52 mL, 1.14 mmol, 0.75 M). After stirring the reaction mixture for 30 mins, all volatiles were removed *in vacuo*. The residue was washed with hexane (2 mL) at  $-30\text{ }^\circ\text{C}$  and dried under reduced pressure to yield **2a** as a yellow solid (194 mg, 365  $\mu\text{mol}$ , 70%). Crystals of **2a** suitable for X-ray diffraction were obtained by slow evaporation of a saturated hexane solution at  $-30\text{ }^\circ\text{C}$ .

**$^1\text{H}$  NMR** (500.1 MHz,  $\text{C}_6\text{D}_6$ , 298 K):  $\delta$  = 6.80 (s, 2H, Mes-CH), 5.79 (t,  $^3J_{\text{PH}} = 5.0$  Hz, 1H, RhCH), 2.47 (s, 6H, Mes- $\text{CH}_3$ ), 2.27-2.26 (m, 3H, RhCCCH $_3$ ), 2.18 (s, 3H, Mes- $\text{CH}_3$ ), 1.20 (s, 9H, *t*Bu- $\text{CH}_3$ ), 1.12 (vtd,  $N = 6.8$  Hz,  $^3J_{\text{RhH}} = 0.8$  Hz, 18H,  $\text{P}(\text{CH}_3)_3$ ) ppm.

**$^{13}\text{C}\{^1\text{H}\}$  NMR** (125.8 MHz,  $\text{C}_6\text{D}_6$ , 298 K):  $\delta$  = 146.6 (t,  $^3J_{\text{PC}} = 4.5$  Hz, RhCCCH $_3$ ), 142.8 (br s, Mes- $\text{C}_q$ ), 137.7 (t,  $^4J_{\text{PC}} = 0.8$  Hz, Mes- $\text{C}_q$ ), 136.6 (s, Mes- $\text{C}_q$ ), 128.3 (Mes-CH, detected by HSQC), 125.1 (dt,  $^1J_{\text{RhC}} = 30.9$  Hz,  $^2J_{\text{PC}} = 13.0$  Hz, RhCH), 55.4 (d,  $^3J_{\text{RhC}} = 1.2$  Hz, *t*Bu- $\text{C}_q$ ), 32.6 (s, *t*Bu- $\text{CH}_3$ ), 26.2 (t,  $^5J_{\text{PC}} = 1.4$  Hz, Mes- $\text{CH}_3$ ), 24.5-24.4 (m, RhCCCH $_3$ ), 21.4 (s, Mes- $\text{CH}_3$ ), 14.1 (vtd,  $N = 28.9$  Hz,  $^2J_{\text{RhC}} = 1.3$  Hz,  $\text{P}(\text{CH}_3)_3$ ) ppm.

**$^{11}\text{B}$  NMR** (160.5 MHz,  $\text{C}_6\text{D}_6$ , 298 K):  $\delta$  = 67.8 (br s) ppm.

**$^{31}\text{P}\{^1\text{H}\}$  NMR** (202.5 MHz,  $\text{C}_6\text{D}_6$ , 298 K):  $\delta$  =  $-4.7$  (d,  $^1J_{\text{RhP}} = 130$  Hz, 2 P) ppm.

HRMS (LIFDI,  $\text{C}_{22}\text{H}_{42}\text{BClNP}_2\text{Rh}$ ): *calcd*:  $m/z = 531.1624$ , *found*:  $m/z = 531.1612$ .

UV-vis (hexane):  $\lambda_{\text{abs}} = 250$  (shoulder), 290, 355 nm.

## Synthesis of 2b

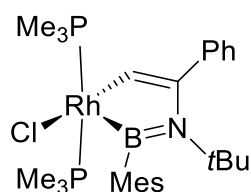

**1b** (280 mg, 465  $\mu\text{mol}$ ) was dissolved in benzene (8 mL) and treated with a stock solution of trimethylphosphine in benzene (1.36 mL, 1.02 mmol, 0.75 M). After stirring the reaction mixture for 1 h, all volatiles were removed *in vacuo*. The residue was washed with hexane (2 mL) at  $-30\text{ }^\circ\text{C}$  and dried under reduced pressure to yield **2b** as a yellow solid (197 mg, 332  $\mu\text{mol}$ , 71%). Crystals of **2b** suitable for X-ray diffraction were obtained by slow evaporation of a saturated hexane solution at  $-30\text{ }^\circ\text{C}$ .

$^1\text{H}$  NMR (500.1 MHz,  $\text{C}_6\text{D}_6$ , 298 K):  $\delta$  = 7.42-7.40 (m, 2H, Ph-CH), 7.22-7.19 (m, 2H, Ph-CH), 7.13-7.10 (m, 1H, Ph-CH), 6.85 (s, 2H, Mes-CH), 5.80 (t,  $^3J_{\text{PH}} = 5.1$  Hz, 1H, RhCH), 2.63 (s, 6H, Mes- $\text{CH}_3$ ), 2.19 (s, 3H, Mes- $\text{CH}_3$ ), 1.16 (s, 9H, *t*Bu- $\text{CH}_3$ ), 1.14 (vtd,  $N = 6.9$  Hz,  $^3J_{\text{RhH}} = 0.9$  Hz, 18H,  $\text{P}(\text{CH}_3)_3$ ) ppm.

$^{13}\text{C}\{^1\text{H}\}$  NMR (125.8 MHz,  $\text{C}_6\text{D}_6$ , 298 K):  $\delta$  = 153.8 (t,  $^3J_{\text{PC}} = 4.7$  Hz, NCPH), 144.92-144.88 (m, Ph- $\text{C}_q$ ), 142.3 (br s, Mes- $\text{C}_q$ ), 138.1 (t,  $^4J_{\text{PC}} = 0.7$  Hz, Mes- $\text{C}_q$ ), 137.1 (s, Mes- $\text{C}_q$ ), 131.7 (dt,  $^1J_{\text{RhC}} = 31.4$  Hz,  $^2J_{\text{PC}} = 12.8$  Hz, RhCH), 128.9 (t,  $^5J_{\text{PC}} = 1.8$  Hz, Ph-CH), 128.5 (s, Mes-CH), 127.9 (s, Ph-CH), 126.1 (s, Ph-CH), 56.3 (d,  $^3J_{\text{RhC}} = 1.1$  Hz, *t*Bu- $\text{C}_q$ ), 32.6 (s, *t*Bu- $\text{CH}_3$ ), 26.6 (t,  $^5J_{\text{PC}} = 1.3$  Hz, Mes- $\text{CH}_3$ ), 21.4 (s, Mes- $\text{CH}_3$ ), 14.1 (vtd,  $N = 29.1$  Hz,  $^2J_{\text{RhC}} = 1.3$  Hz,  $\text{P}(\text{CH}_3)_3$ ) ppm.

$^{11}\text{B}$  NMR (160.5 MHz,  $\text{C}_6\text{D}_6$ , 298 K):  $\delta$  = 70.2 (br s) ppm.

$^{31}\text{P}\{^1\text{H}\}$  NMR (202.5 MHz,  $\text{C}_6\text{D}_6$ , 298 K):  $\delta$  =  $-4.5$  (d,  $^1J_{\text{RhP}} = 128$  Hz, 2 P) ppm.

HRMS (LIFDI,  $\text{C}_{27}\text{H}_{44}\text{BClINP}_2\text{Rh}$ ): *calcd*:  $m/z = 593.1780$ , *found*:  $m/z = 593.1770$ .

UV-vis (hexane):  $\lambda_{\text{abs}} = 252, 294, 348$  nm.

## Synthesis of **2c**

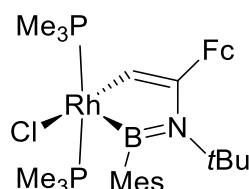

**1c** (152 mg, 214  $\mu\text{mol}$ ) was dissolved in benzene (6 mL) and treated with a stock solution of trimethylphosphine in benzene (0.53 mL, 470  $\mu\text{mol}$ , 0.887 M). After stirring the reaction mixture for 1 h, all volatiles were removed *in vacuo*. The residue was washed with hexane (2 x 2 mL) at  $-30\text{ }^\circ\text{C}$  and dried under reduced pressure to yield **2c** as an orange solid (102 mg,

145  $\mu\text{mol}$ , 68%). Crystals of **2c** suitable for X-ray diffraction were obtained by evaporation of a saturated benzene solution.

**$^1\text{H}$  NMR** (500.1 MHz,  $\text{C}_6\text{D}_6$ , 298 K):  $\delta$  = 6.97 (t,  $^3J_{\text{PH}} = 5.3$  Hz, 1H, RhCH), 6.83 (s, 2H, Mes-CH), 4.24-4.23 (m, 2H,  $\text{C}_5\text{H}_4\text{-CH}$ ), 4.17 (s, 5H, Cp-CH), 4.01-4.00 (m, 2H,  $\text{C}_5\text{H}_4\text{-CH}$ ), 2.54 (s, 6H, Mes- $\text{CH}_3$ ), 2.19 (s, 3H, Mes- $\text{CH}_3$ ), 1.26 (vtd,  $N = 6.8$  Hz,  $^3J_{\text{RhH}} = 0.9$  Hz, 18H,  $\text{P}(\text{CH}_3)_3$ ) 1.06 (s, 9H, *t*Bu- $\text{CH}_3$ ) ppm.

*Comment: The spectrum contains a signal corresponding to residual benzene at 7.16 (s) ppm.*

**$^{13}\text{C}\{^1\text{H}\}$  NMR** (125.8 MHz,  $\text{C}_6\text{D}_6$ , 298 K):  $\delta$  = 146.4 (t,  $^3J_{\text{PC}} = 4.4$  Hz, NCFc), 142.7 (br s, Mes- $\text{C}_q$ ), 137.9 (t,  $^4J_{\text{PC}} = 0.8$  Hz, Mes- $\text{C}_q$ ), 136.7 (s, Mes- $\text{C}_q$ ), 132.9 (dt,  $^1J_{\text{RhC}} = 30.6$  Hz,  $^2J_{\text{PC}} = 12.6$  Hz, RhCH), 128.4 (s, Mes-CH), 95.14-95.09 (m,  $\text{C}_5\text{H}_4\text{-C}_q$ ), 73.4 (t,  $^5J_{\text{PC}} = 1.7$  Hz,  $\text{C}_5\text{H}_4\text{-CH}$ ), 69.4 (s, Cp-CH), 66.3 (s,  $\text{C}_5\text{H}_4\text{-CH}$ ), 56.1 (d,  $^3J_{\text{RhC}} = 1.2$  Hz, *t*Bu- $\text{C}_q$ ), 32.8 (s, *t*Bu- $\text{CH}_3$ ), 26.4 (t,  $^5J_{\text{PC}} = 1.2$  Hz, Mes- $\text{CH}_3$ ), 21.4 (s, Mes- $\text{CH}_3$ ), 14.4 (vtd,  $N = 28.9$  Hz,  $^2J_{\text{RhC}} = 1.3$  Hz,  $\text{P}(\text{CH}_3)_3$ ) ppm.

*Comment: The spectrum contains a signal corresponding to residual benzene at 128.6 ppm.*

**$^{11}\text{B}$  NMR** (160.5 MHz,  $\text{C}_6\text{D}_6$ , 298 K):  $\delta$  = 68.7 (br s) ppm.

**$^{31}\text{P}\{^1\text{H}\}$  NMR** (202.5 MHz,  $\text{C}_6\text{D}_6$ , 298 K):  $\delta$  = -5.5 (d,  $^1J_{\text{RhP}} = 130$  Hz, 2 P) ppm.

HRMS (LIFDI,  $\text{C}_{31}\text{H}_{48}\text{BFeClNP}_2\text{Rh}$ ): *calcd*:  $m/z = 701.1443$ , *found*:  $m/z = 701.1432$ .

UV-vis (THF):  $\lambda_{\text{abs}} = 255$  (shoulder), 349 nm.

## Synthesis of **2d**

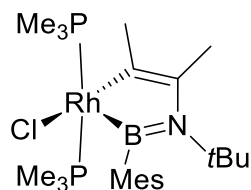

**1d** (500 mg, 903  $\mu\text{mol}$ ) was dissolved in benzene (10 mL) and treated with a stock solution of trimethylphosphine in benzene (2.65 mL, 1.99 mmol, 0.75 M). After stirring the reaction mixture for 1 h, all volatiles were removed *in vacuo*. The residue was washed with hexane (2 mL) at -30  $^\circ\text{C}$  and dried under reduced pressure to yield **2d** as a yellow solid (431 mg, 790  $\mu\text{mol}$ , 87%). Crystals of **2d** suitable for X-ray diffraction were obtained by slow evaporation of a saturated hexane solution at -30  $^\circ\text{C}$ .

**<sup>1</sup>H NMR** (500.1 MHz, C<sub>6</sub>D<sub>6</sub>, 298 K): δ = 6.806-6.805 (m, 2H, Mes-CH), 2.50 (s, 6H, Mes-CH<sub>3</sub>), 2.19 (s, 3H, Mes-CH<sub>3</sub>), 2.10-2.09 (m, 3H, RhCCCH<sub>3</sub>), 2.08-2.07 (m, 3H, RhCCH<sub>3</sub>), 1.22 (s, 9H, *t*Bu-CH<sub>3</sub>), 1.10 (vtd, *N* = 6.8 Hz, <sup>3</sup>*J*<sub>RhH</sub> = 1.0 Hz, 18H, P(CH<sub>3</sub>)<sub>3</sub>) ppm.

**<sup>1</sup>H{<sup>31</sup>P} NMR** (500.1 MHz, C<sub>6</sub>D<sub>6</sub>, 298 K): δ = 6.80 (s, 2H, Mes-CH), 2.50 (s, 6H, Mes-CH<sub>3</sub>), 2.19 (s, 3H, Mes-CH<sub>3</sub>), 2.10 (s, 3H, RhCCCH<sub>3</sub>), 2.075-2.072 (m, 3H, RhCCH<sub>3</sub>), 1.22 (s, 9H, *t*Bu-CH<sub>3</sub>), 1.10 (d, <sup>3</sup>*J*<sub>RhH</sub> = 0.7 Hz, 18H, P(CH<sub>3</sub>)<sub>3</sub>) ppm.

**<sup>13</sup>C{<sup>1</sup>H} NMR** (125.8 MHz, C<sub>6</sub>D<sub>6</sub>, 298 K): δ = 143.4 (Mes-C<sub>q</sub>, detected by HMBC), 139.7 (dt, <sup>2</sup>*J*<sub>RhC</sub> = 0.5 Hz, <sup>3</sup>*J*<sub>PC</sub> = 4.5 Hz, RhCCCH<sub>3</sub>), 137.9 (t, <sup>4</sup>*J*<sub>PC</sub> = 0.7 Hz, Mes-C<sub>q</sub>), 136.6 (s, Mes-C<sub>q</sub>), 129.8 (dt, <sup>1</sup>*J*<sub>RhC</sub> = 30.7 Hz, <sup>2</sup>*J*<sub>PC</sub> = 11.3 Hz, RhCCH<sub>3</sub>), 128.3 (s, Mes-CH), 55.2 (d, <sup>3</sup>*J*<sub>RhC</sub> = 1.2 Hz, *t*Bu-C<sub>q</sub>), 33.0 (s, *t*Bu-CH<sub>3</sub>), 26.7 (t, <sup>5</sup>*J*<sub>PC</sub> = 0.9 Hz, Mes-CH<sub>3</sub>), 23.8 (dt, <sup>2</sup>*J*<sub>RhC</sub> = 0.5 Hz, <sup>3</sup>*J*<sub>PC</sub> = 3.3 Hz, RhCCH<sub>3</sub>), 21.4 (s, Mes-CH<sub>3</sub>), 17.54-17.50 (m, RhCCCH<sub>3</sub>), 14.7 (vtd, *N* = 28.2 Hz, <sup>2</sup>*J*<sub>RhC</sub> = 1.4 Hz, P(CH<sub>3</sub>)<sub>3</sub>) ppm.

**<sup>13</sup>C{<sup>1</sup>H, <sup>31</sup>P} NMR** (75.5 MHz, C<sub>6</sub>D<sub>6</sub>, 298 K): δ = 143.3 (br s, Mes-C<sub>q</sub>), 139.7 (d, <sup>2</sup>*J*<sub>RhC</sub> = 0.5 Hz, RhCCCH<sub>3</sub>), 137.9 (s, Mes-C<sub>q</sub>), 136.5 (s, Mes-C<sub>q</sub>), 129.8 (d, <sup>1</sup>*J*<sub>RhC</sub> = 30.7 Hz, RhCCH<sub>3</sub>), 128.3 (s, Mes-CH), 55.2 (d, <sup>3</sup>*J*<sub>RhC</sub> = 1.2 Hz, *t*Bu-C<sub>q</sub>), 33.0 (s, *t*Bu-CH<sub>3</sub>), 26.7 (s, Mes-CH<sub>3</sub>), 23.8 (d, <sup>2</sup>*J*<sub>RhC</sub> = 0.5 Hz, RhCCH<sub>3</sub>), 21.4 (s, Mes-CH<sub>3</sub>), 17.5 (d, <sup>3</sup>*J*<sub>RhC</sub> = 2.0 Hz, RhCCCH<sub>3</sub>), 14.7 (d, <sup>2</sup>*J*<sub>RhC</sub> = 1.4 Hz, P(CH<sub>3</sub>)<sub>3</sub>) ppm.

**<sup>11</sup>B NMR** (160.5 MHz, C<sub>6</sub>D<sub>6</sub>, 298 K): δ = 68.0 (br s) ppm.

**<sup>31</sup>P{<sup>1</sup>H} NMR** (202.5 MHz, C<sub>6</sub>D<sub>6</sub>, 298 K): δ = -5.1 (d, <sup>1</sup>*J*<sub>RhP</sub> = 133 Hz, 2 P) ppm.

HRMS (LIFDI, C<sub>23</sub>H<sub>44</sub>BClNP<sub>2</sub>Rh): *calcd*: *m/z* = 545.1780, *found*: *m/z* = 545.1757.

UV-vis (hexane): λ<sub>abs</sub> = 254, 291 (shoulder), 352 nm.

## Synthesis of 2e

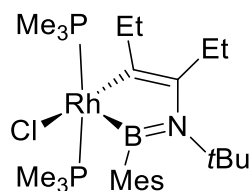

**1e** (496 mg, 852 μmol) was dissolved in benzene (10 mL) and treated with a stock solution of trimethylphosphine in benzene (2.5 mL, 1.96 mmol, 0.784 M). After stirring the reaction mixture for 4 h, all volatiles were removed *in vacuo*. The residue was washed with pentane (3 x 3 mL) and dried under reduced pressure to yield **2e** as a yellow solid (386 mg, 673 μmol,

79%). Crystals of **2e** suitable for X-ray diffraction were obtained by slow evaporation of a saturated hexane solution at  $-30\text{ }^{\circ}\text{C}$ .

**$^1\text{H}$  NMR** (500.1 MHz,  $\text{C}_6\text{D}_6$ , 298 K):  $\delta = 6.81$  (s, 2H, Mes-CH), 2.58 (s, 6H, Mes- $\text{CH}_3$ ), 2.53 (q,  $^3J_{\text{HH}} = 7.3$  Hz, 2H, Et- $\text{CH}_2$ ), 2.36 (qd,  $^3J_{\text{HH}} = 7.6$  Hz,  $^3J_{\text{RhH}} = 1.2$  Hz, 2H, Et- $\text{CH}_2$ ), 2.18 (s, 3H, Mes- $\text{CH}_3$ ), 1.34 (t,  $^3J_{\text{HH}} = 7.3$  Hz, 3H, Et- $\text{CH}_3$ ), 1.20 (s, 9H, *t*Bu- $\text{CH}_3$ ), 1.15 (t,  $^3J_{\text{HH}} = 7.3$  Hz, 3H, Et- $\text{CH}_3$ ) overlapping with 1.13 (vtd,  $N = 6.6$  Hz,  $^3J_{\text{RhH}} = 0.9$  Hz, 18H,  $\text{P}(\text{CH}_3)_3$ ) ppm.

**$^1\text{H}\{^{31}\text{P}\}$  NMR** (500.1 MHz,  $\text{C}_6\text{D}_6$ , 298 K):  $\delta = 6.804$ - $6.803$  (m, 2H, Mes-CH), 2.57 (s, 6H, Mes- $\text{CH}_3$ ), 2.53 (q,  $^3J_{\text{HH}} = 7.3$  Hz, 2H, Et- $\text{CH}_2$ ), 2.35 (qd,  $^3J_{\text{HH}} = 7.6$  Hz,  $^3J_{\text{RhH}} = 1.2$  Hz, 2H, Et- $\text{CH}_2$ ), 2.18 (s, 3H, Mes- $\text{CH}_3$ ), 1.34 (t,  $^3J_{\text{HH}} = 7.6$  Hz, 3H, Et- $\text{CH}_3$ ), 1.20 (s, 9H, *t*Bu- $\text{CH}_3$ ), 1.15 (t,  $^3J_{\text{HH}} = 7.3$  Hz, 3H, Et- $\text{CH}_3$ ) overlapping with 1.13 (d,  $^3J_{\text{RhH}} = 0.9$  Hz, 18H,  $\text{P}(\text{CH}_3)_3$ ) ppm.

*Comment: The spectrum contains a signal corresponding to residual benzene at 7.156 ppm*

**$^{13}\text{C}\{^1\text{H}\}$  NMR** (125.8 MHz,  $\text{C}_6\text{D}_6$ , 298 K):  $\delta = 145.4$  (t,  $^3J_{\text{PC}} = 4.4$  Hz, NCEt), 143.4 (br s, Mes- $\text{C}_q$ ), 138.37 (dt,  $^1J_{\text{RhC}} = 32.3$  Hz,  $^2J_{\text{PC}} = 10.3$  Hz, RhCEt) overlapping with 138.36 (t,  $^4J_{\text{PC}} = 0.7$  Hz, Mes- $\text{C}_q$ ), 136.7 (s, Mes- $\text{C}_q$ ), 128.6 (s, Mes-CH), 54.9 (d,  $^3J_{\text{RhC}} = 1.1$  Hz, *t*Bu- $\text{C}_q$ ), 32.8 (s, *t*Bu- $\text{CH}_3$ ), 30.5 (dt,  $^2J_{\text{RhC}} = 0.5$  Hz,  $^3J_{\text{PC}} = 3.2$  Hz, Et- $\text{CH}_2$ ), 26.7 (s, Mes- $\text{CH}_3$ ), 22.89-22.85 (m, Et- $\text{CH}_2$ ), 21.3 (s, Mes- $\text{CH}_3$ ), 18.4 (d,  $^3J_{\text{RhC}} = 0.9$  Hz, Et- $\text{CH}_3$ ), 15.7 (vtd,  $N = 28.4$  Hz,  $^2J_{\text{RhC}} = 1.4$  Hz,  $\text{P}(\text{CH}_3)_3$ ), 14.8 (dt,  $^4J_{\text{RhC}} = 0.4$  Hz,  $^5J_{\text{PC}} = 2.7$  Hz, Et- $\text{CH}_3$ ) ppm.

*Comment: The spectrum contains signals corresponding to residual hexane from crystallization at 31.97, 23.06 and 14.36 ppm.*

**$^{11}\text{B}$  NMR** (160.5 MHz,  $\text{C}_6\text{D}_6$ , 298 K):  $\delta = 69.4$  (br s) ppm.

**$^{31}\text{P}\{^1\text{H}\}$  NMR** (202.5 MHz,  $\text{C}_6\text{D}_6$ , 298 K):  $\delta = -6.5$  (d,  $^1J_{\text{RhP}} = 133$  Hz, 2 P) ppm.

HRMS (LIFDI,  $\text{C}_{25}\text{H}_{48}\text{BCINP}_2\text{Rh}$ ): *calcd*:  $m/z = 573.2093$ , *found*:  $m/z = 573.2082$ .

UV-vis (hexane):  $\lambda_{\text{abs}} = 248$  (shoulder), 285 (shoulder), 347, 413 (shoulder) nm.

## Synthesis of **2f**

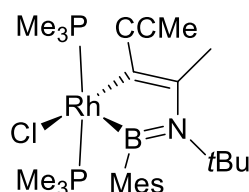

**1f** (430 mg, 744  $\mu\text{mol}$ ) was dissolved in benzene (10 mL) and treated with a stock solution of trimethylphosphine in benzene (2.20 mL, 1.65 mmol, 0.75 M). After stirring the reaction mixture for 1 h, all volatiles were removed *in vacuo* and the residue was dissolved in 5 mL hexane. The yellow solution was filtrated and compound **2f** crystallized at  $-30\text{ }^\circ\text{C}$ . The yellow crystals were washed with hexane (2 x 2 mL) at  $-30\text{ }^\circ\text{C}$  and dried under reduced pressure to yield **2f** as a yellow crystalline solid (352 mg, 618  $\mu\text{mol}$ , 83%). Crystals of **2f** suitable for X-ray diffraction were also obtained by slow evaporation of a saturated benzene solution.

**$^1\text{H}$  NMR** (500.1 MHz,  $\text{C}_6\text{D}_6$ , 298 K):  $\delta$  = 6.80 (s, 2H, Mes-CH), 2.52 (t,  $^6J_{\text{PH}} = 2.5\text{ Hz}$ , 3H, RhCCCH<sub>3</sub>), 2.46 (s, 6H, Mes-CH<sub>3</sub>), 2.18 (s, 3H, Mes-CH<sub>3</sub>), 1.90 (s, 3H, RhCCCCH<sub>3</sub>), 1.25 (vtd,  $N = 7.1\text{ Hz}$ ,  $^3J_{\text{RhH}} = 0.8\text{ Hz}$ , 18H, P(CH<sub>3</sub>)<sub>3</sub>), 1.17 (s, 9H, *t*Bu-CH<sub>3</sub>) ppm.

**$^1\text{H}\{^{31}\text{P}\}$  NMR** (500.1 MHz,  $\text{C}_6\text{D}_6$ , 298 K):  $\delta$  = 6.799-6.796 (m, 2H, Mes-CH), 2.51 (s, 3H, RhCCCH<sub>3</sub>), 2.46 (s, 6H, Mes-CH<sub>3</sub>), 2.18 (s, 3H, Mes-CH<sub>3</sub>), 1.90 (s, 3H, RhCCCCH<sub>3</sub>), 1.25 (d,  $^3J_{\text{RhH}} = 0.8\text{ Hz}$ , 18H, P(CH<sub>3</sub>)<sub>3</sub>), 1.17 (s, 9H, *t*Bu-CH<sub>3</sub>) ppm.

*Comment: The spectrum contains signals corresponding to residual hexane from crystallization at 1.25 (m) and 0.88 (t) ppm.*

**$^{13}\text{C}\{^1\text{H}\}$  NMR** (125.8 MHz,  $\text{C}_6\text{D}_6$ , 298 K):  $\delta$  = 151.8 (dt,  $^2J_{\text{RhC}} = 0.7\text{ Hz}$ ,  $^3J_{\text{PC}} = 4.5\text{ Hz}$ , RhCCCH<sub>3</sub>), 143.0 (br s, Mes-C<sub>q</sub>), 137.6 (t,  $^4J_{\text{PC}} = 0.8\text{ Hz}$ , Mes-C<sub>q</sub>), 136.8 (s, Mes-C<sub>q</sub>), 128.3 (s, Mes-CH), 112.7 (dt,  $^1J_{\text{RhC}} = 30.1\text{ Hz}$ ,  $^2J_{\text{PC}} = 10.9\text{ Hz}$ , RhCCCCH<sub>3</sub>), 94.3 (d,  $^3J_{\text{RhC}} = 1.0\text{ Hz}$ , RhCCCCH<sub>3</sub>), 84.5 (dt,  $^2J_{\text{RhC}} = 1.1\text{ Hz}$ ,  $^3J_{\text{PC}} = 3.2\text{ Hz}$ , RhCCCCH<sub>3</sub>), 55.8 (d,  $^3J_{\text{RhC}} = 1.2\text{ Hz}$ , *t*Bu-C<sub>q</sub>), 32.7 (s, *t*Bu-CH<sub>3</sub>), 26.5 (t,  $^5J_{\text{PC}} = 1.1\text{ Hz}$ , Mes-CH<sub>3</sub>), 21.4 (s, Mes-CH<sub>3</sub>), 21.23-21.19 (m, RhCCCH<sub>3</sub>), 13.9 (vtd,  $N = 28.7\text{ Hz}$ ,  $^2J_{\text{RhC}} = 1.2\text{ Hz}$ , P(CH<sub>3</sub>)<sub>3</sub>), 5.5 (s, RhCCCCH<sub>3</sub>) ppm.

**$^{13}\text{C}\{^1\text{H}, ^{31}\text{P}\}$  NMR** (75.5 MHz,  $\text{C}_6\text{D}_6$ , 298 K):  $\delta$  = 151.8 (d,  $^2J_{\text{RhC}} = 0.8\text{ Hz}$ , RhCCCH<sub>3</sub>), 137.6 (Mes-C<sub>q</sub>), 136.8 (s, Mes-C<sub>q</sub>), 128.3 (s, Mes-CH), 112.7 (d,  $^1J_{\text{RhC}} = 30.1\text{ Hz}$ , RhCCCCH<sub>3</sub>), 94.4 (d,  $^3J_{\text{RhC}} = 1.0\text{ Hz}$ , RhCCCCH<sub>3</sub>), 84.5 (d,  $^2J_{\text{RhC}} = 1.1\text{ Hz}$ , RhCCCCH<sub>3</sub>), 55.8 (d,  $^3J_{\text{RhC}} = 1.2\text{ Hz}$ , *t*Bu-C<sub>q</sub>), 32.8 (s, *t*Bu-CH<sub>3</sub>), 26.5 (s, Mes-CH<sub>3</sub>), 21.4 (s, Mes-CH<sub>3</sub>), 21.2 (d,  $^3J_{\text{RhC}} = 2.2\text{ Hz}$ , RhCCCH<sub>3</sub>), 13.9 (d,  $^2J_{\text{RhC}} = 1.3\text{ Hz}$ , P(CH<sub>3</sub>)<sub>3</sub>), 5.5 (s, RhCCCCH<sub>3</sub>) ppm.

*Comment: The spectrum contains signals corresponding to residual hexane from crystallization at 31.97, 23.06 and 14.35 ppm. The broad singlet for the Mes-C<sub>q</sub> nucleus bound to the boron atom could not be observed in the  $^{13}\text{C}\{^1\text{H}, ^{31}\text{P}\}$  NMR spectrum.*

**$^{11}\text{B}$  NMR** (160.5 MHz,  $\text{C}_6\text{D}_6$ , 298 K):  $\delta$  = 70.2 (br s) ppm.

**$^{31}\text{P}\{^1\text{H}\}$  NMR** (202.5 MHz,  $\text{C}_6\text{D}_6$ , 298 K):  $\delta$  =  $-3.7$  (d,  $^1J_{\text{RhP}} = 128\text{ Hz}$ , 2 P) ppm.

HRMS (LIFDI,  $\text{C}_{25}\text{H}_{44}\text{BClNP}_2\text{Rh}$ ): *calcd*:  $m/z = 569.1780$ , *found*:  $m/z = 569.1767$ .

UV-vis (hexane):  $\lambda_{\text{abs}} = 260, 345\text{ nm}$ .

## Synthesis of **2g**

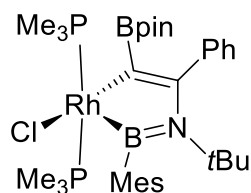

**1g** (325 mg, 447  $\mu\text{mol}$ ) was dissolved in benzene (10 mL) and treated with a stock solution of trimethylphosphine in benzene (2.61 mL, 1.96 mmol, 0.75 M). After stirring the reaction mixture for 4 d, all volatiles were removed *in vacuo* and the residue was dissolved in 10 mL benzene. The orange solution was filtrated and the solvent was removed under reduced pressure. After washing the residue with hexane (3 x 4 mL) all volatiles were removed *in vacuo* to yield **2g** as a yellow solid (114 mg, 158  $\mu\text{mol}$ , 35%). Crystals of **2g** suitable for X-ray diffraction were obtained by slow evaporation of a saturated hexane solution at  $-30\text{ }^{\circ}\text{C}$ .

**$^1\text{H}$  NMR** (500.1 MHz,  $\text{C}_6\text{D}_6$ , 298 K):  $\delta$  = 7.54-7.52 (m, 2H, Ph-CH), 7.19-7.17 (m, 2H, Ph-CH overlapping with  $\text{C}_6\text{D}_6$ ), 7.13-7.10 (m, 1H, Ph-CH), 6.85 (s, 2H, Mes-CH), 2.70 (s, 6H, Mes- $\text{CH}_3$ ), 2.20 (s, 3H, Mes- $\text{CH}_3$ ), 1.37 (vtd,  $N = 7.1\text{ Hz}$ ,  $^3J_{\text{RhH}} = 0.8\text{ Hz}$ , 18H,  $\text{P}(\text{CH}_3)_3$ ), 1.13 (s, 9H,  $t\text{Bu-CH}_3$ ), 0.86 (s, 12H, Bpin- $\text{CH}_3$ ) ppm.

**$^{13}\text{C}\{^1\text{H}\}$  NMR** (125.8 MHz,  $\text{C}_6\text{D}_6$ , 298 K):  $\delta$  = 157.1 (br s, NCPH), 143.9-143.8 (m, Ph- $\text{C}_q$ ), 143.0 (br s, Mes- $\text{C}_q$ ), 138.5 (t,  $^4J_{\text{PC}} = 0.7\text{ Hz}$ , Mes- $\text{C}_q$ ), 137.0 (s, Mes- $\text{C}_q$ ), 131.2 (t,  $^5J_{\text{PC}} = 1.8\text{ Hz}$ , Ph-CH), 128.5 (s, Mes-CH), 126.9 (s, Ph-CH), 126.2 (s, Ph-CH), 81.8 (s, Bpin- $\text{C}_q$ ), 56.7 (d,  $^3J_{\text{RhC}} = 1.3\text{ Hz}$ ,  $t\text{Bu-CH}_3$ ), 33.0 (s,  $t\text{Bu-CH}_3$ ), 26.96-26.95 (m, Mes- $\text{CH}_3$ ), 25.0 (s, Bpin- $\text{CH}_3$ ), 21.4 (s, Mes- $\text{CH}_3$ ), 14.7 (vtd,  $N = 28.9\text{ Hz}$ ,  $^2J_{\text{RhC}} = 1.3\text{ Hz}$ ,  $\text{P}(\text{CH}_3)_3$ ) ppm.

*Comment: The spectrum contains signals corresponding to residual hexane at 31.97, 23.06 and 14.35 ppm. The RhCBpin carbon nucleus was not observed in the  $^{13}\text{C}\{^1\text{H}\}$  NMR spectrum.*

**$^{11}\text{B}$  NMR** (160.5 MHz,  $\text{C}_6\text{D}_6$ , 298 K):  $\delta$  = 71.3 (br s, RhBMes), 30.3 (br s, Bpin-B) ppm.

**$^{31}\text{P}\{^1\text{H}\}$  NMR** (202.5 MHz,  $\text{C}_6\text{D}_6$ , 298 K):  $\delta$  = -4.9 (d,  $^1J_{\text{RhP}} = 128\text{ Hz}$ , 2 P) ppm.

HRMS (LIFDI,  $\text{C}_{33}\text{H}_{55}\text{B}_2\text{ClNO}_2\text{P}_2\text{Rh}$ ): *calcd*:  $m/z = 719.2632$ , *found*:  $m/z = 719.2620$ .

UV-vis (hexane):  $\lambda_{\text{abs}} = 255, 291$  (shoulder), 362 nm.



## Synthesis of **2l**

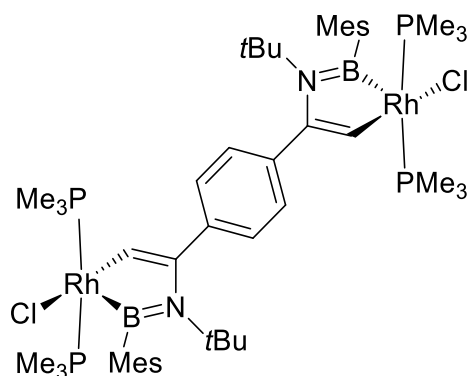

**1l** (100 mg, 88.8  $\mu\text{mol}$ ) was dissolved in benzene (10 mL) and treated with a stock solution of trimethylphosphine in benzene (0.52 mL, 390  $\mu\text{mol}$ , 0.75 M). After stirring the reaction mixture for 15 h, all volatiles were removed *in vacuo*. The residue was first washed with pentane (3 x 2 mL), then with benzene (3 x 2 mL), and then dried under reduced pressure to yield **2l** as a yellow solid (59 mg, 53.2  $\mu\text{mol}$ , 60%). Crystals of **2l** suitable for X-ray diffraction were obtained by evaporation of a saturated benzene solution.

**$^1\text{H}$  NMR** (400.6 MHz,  $\text{C}_6\text{D}_6$ , 298 K):  $\delta$  = 7.43 (s, 4H,  $\text{C}_6\text{H}_4\text{-CH}$ ), 6.88 (s, 4H,  $\text{Mes-CH}$ ), 5.92 (t,  $^3J_{\text{PH}} = 5.0$  Hz, 2H,  $\text{RhCH}$ ), 2.67 (s, 12H,  $\text{Mes-CH}_3$ ), 2.21 (s, 6H,  $\text{Mes-CH}_3$ ), 1.24 (s, 18H,  $t\text{Bu-CH}_3$ ), 1.17 (vt,  $N = 6.2$  Hz, 36H,  $\text{P}(\text{CH}_3)_3$ ) ppm.

**$^{13}\text{C}\{^1\text{H}\}$  NMR** (125.8 MHz,  $\text{C}_6\text{D}_6$ , 298 K):  $\delta$  = 153.7 ( $\text{RhCC}_q$ , detected by HMBC), 142.3 ( $\text{C}_6\text{H}_4\text{-C}_q$ , detected by HMBC), 142.3 ( $\text{Mes-C}_q$ , detected by HMBC), 138.1 (s,  $\text{Mes-C}_q$ ), 137.2 (s,  $\text{Mes-C}_q$ ), 131.3 ( $\text{RhCH}$ , detected by HSQC), 128.6 (s,  $\text{Mes-CH}$ ), 128.2 ( $\text{C}_6\text{H}_4\text{-CH}$ , detected by HSQC), 56.4 (d,  $^3J_{\text{RhC}} = 1.1$  Hz,  $t\text{Bu-C}_q$ ), 32.8 (s,  $t\text{Bu-CH}_3$ ), 26.62-26.60 (m,  $\text{Mes-CH}_3$ ), 21.4 (s,  $\text{Mes-CH}_3$ ), 14.1 (vtd,  $N = 29.1$  Hz,  $^2J_{\text{RhC}} = 1.2$  Hz,  $\text{P}(\text{CH}_3)_3$ ) ppm.

**$^{11}\text{B}$  NMR** (128.5 MHz,  $\text{C}_6\text{D}_6$ , 298 K): not observed due to poor solubility.

**$^{31}\text{P}\{^1\text{H}\}$  NMR** (162.2 MHz,  $\text{C}_6\text{D}_6$ , 298 K):  $\delta$  = -4.5 (d,  $^1J_{\text{RhP}} = 128$  Hz, 4 P) ppm.

HRMS (LIFDI,  $\text{C}_{48}\text{H}_{82}\text{B}_2\text{Cl}_2\text{N}_2\text{P}_4\text{Rh}_2$ ): *calcd*:  $m/z = 1108.3096$ , *found*:  $m/z = 1108.3095$ .

UV-vis (THF):  $\lambda_{\text{abs}} = 255$  (shoulder), 299, 344 (shoulder) nm.

## Synthesis of $3a^{\text{Me}}$

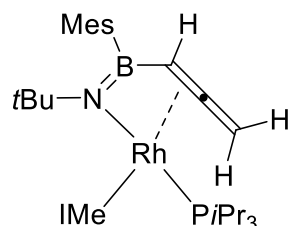

**1a** (200 mg, 371  $\mu\text{mol}$ ) and IMe (106.9 mg, 1.11 mmol) were dissolved in benzene (8 mL). After stirring the reaction mixture for 15 h, the resulting precipitate was filtered off and washed with benzene (3 x 8 mL). After removing all volatiles from the combined benzene fractions *in vacuo*, the residue was washed with pentane (3 x 5 mL) and benzene (2 x 2 mL), and dried under reduced pressure to yield  $3a^{\text{Me}}$  as a yellow solid (89 mg, 148  $\mu\text{mol}$ , 40%). Crystals of  $3a^{\text{Me}}$  suitable for X-ray diffraction were obtained by evaporation of a saturated benzene- $d_6$  solution.

*Comment: The residue of the filtration/extraction was identified as 1,3-dimethylimidazolium chloride by  $^1\text{H}$  NMR spectroscopy.*

**$^1\text{H}$  NMR** (500.1 MHz,  $\text{C}_6\text{D}_6$ , 298 K):  $\delta$  = 7.06 (s, 1H, Mes-CH), 7.02 (s, 1H, Mes-CH), 6.12 (d,  $^3J_{\text{HH}} = 1.8$  Hz, 1H, IMe-NCH), 6.05 (d,  $^3J_{\text{HH}} = 1.9$  Hz, 1H, IMe-NCH), 5.34-5.32 (m, 1H, CCH<sub>2</sub>), 4.85-4.84 (m, 1H, CCH<sub>2</sub>), 3.91 (s, 3H, IMe-CH<sub>3</sub>), 3.22 (s, 3H, IMe-CH<sub>3</sub>), 3.05 (s, 3H, Mes-CH<sub>3</sub>), 2.81 (s, 3H, Mes-CH<sub>3</sub>), 2.52-2.50 (m, 1H, CHCCH<sub>2</sub>), 2.34 (s, 3H, Mes-CH<sub>3</sub>), 1.88-1.81 (m, 3H, *i*Pr-CH), 1.18 (dd,  $^3J_{\text{HH}} = 7.3$  Hz,  $^3J_{\text{PH}} = 12.6$  Hz, 9H, *i*Pr-CH<sub>3</sub>), 1.04 (s, 9H, *t*Bu-CH<sub>3</sub>), 0.77 (dd,  $^3J_{\text{HH}} = 7.3$  Hz,  $^3J_{\text{PH}} = 11.4$  Hz, 9H, *i*Pr-CH<sub>3</sub>) ppm.

*Comment: The spectrum contains signals corresponding to residual pentane at 1.25 (m) and 0.87 (t) ppm*

**$^1\text{H}\{^{31}\text{P}\}$  NMR** (500.1 MHz,  $\text{C}_6\text{D}_6$ , 298 K):  $\delta$  = 7.06 (s, 1H, Mes-CH), 7.02 (s, 1H, Mes-CH), 6.12 (d,  $^3J_{\text{HH}} = 1.8$  Hz, 1H, IMe-NCH), 6.05 (d,  $^3J_{\text{HH}} = 1.8$  Hz, 1H, IMe-NCH), 5.34-5.32 (m, 1H, CCH<sub>2</sub>), 4.85-4.83 (m, 1H, CCH<sub>2</sub>), 3.91 (s, 3H, IMe-CH<sub>3</sub>), 3.22 (s, 3H, IMe-CH<sub>3</sub>), 3.05 (s, 3H, Mes-CH<sub>3</sub>), 2.81 (s, 3H, Mes-CH<sub>3</sub>), 2.52-2.50 (m, 1H, CHCCH<sub>2</sub>), 2.34 (s, 3H, Mes-CH<sub>3</sub>), 1.84 (sept,  $^3J_{\text{HH}} = 7.2$  Hz, 3H, *i*Pr-CH), 1.18 (d,  $^3J_{\text{HH}} = 7.2$  Hz, 9H, *i*Pr-CH<sub>3</sub>), 1.04 (s, 9H, *t*Bu-CH<sub>3</sub>), 0.77 (d,  $^3J_{\text{HH}} = 7.2$  Hz, 9H, *i*Pr-CH<sub>3</sub>) ppm.

**$^{13}\text{C}\{^1\text{H}\}$  NMR** (125.8 MHz,  $\text{C}_6\text{D}_6$ , 298 K):  $\delta$  = 192.8 (dd,  $^1J_{\text{RhC}} = 60.7$  Hz,  $^2J_{\text{PC}} = 16.0$  Hz, IMe-C<sub>q</sub>), 188.8 (dd,  $^1J_{\text{RhC}} = 20.5$  Hz,  $^2J_{\text{PC}} = 4.8$  Hz, CCH<sub>2</sub>), 145.7 (Mes-C<sub>q</sub>, detected by

HMBC), 140.1 (s, Mes-C<sub>q</sub>), 137.4 (s, Mes-C<sub>q</sub>), 134.6 (s, Mes-C<sub>q</sub>), 128.0 (Mes-CH, detected by HSQC), 127.1 (s, Mes-CH), 122.2 (d, <sup>3</sup>J<sub>RhC</sub> = 1.4 Hz, IMe-NCH), 121.2 (d, <sup>3</sup>J<sub>RhC</sub> = 1.3 Hz, IMe-NCH), 85.90-85.88 (m, CCH<sub>2</sub>), 54.4 (dd, <sup>2</sup>J<sub>RhC</sub> = 0.9 Hz, <sup>3</sup>J<sub>PC</sub> = 3.6 Hz, *t*Bu-C<sub>q</sub>), 41.6 (br s, CHCCH<sub>2</sub>), 39.1 (d, <sup>3</sup>J<sub>RhC</sub> = 1.2 Hz, IMe-CH<sub>3</sub>), 38.7 (d, <sup>3</sup>J<sub>RhC</sub> = 0.6 Hz, IMe-CH<sub>3</sub>), 34.4-34.3 (m, *t*Bu-CH<sub>3</sub>), 25.9 (dd, <sup>1</sup>J<sub>PC</sub> = 17.4 Hz, <sup>2</sup>J<sub>RhC</sub> = 0.8 Hz, *i*Pr-CH), 24.1 (s, Mes-CH<sub>3</sub>), 23.6 (s, Mes-CH<sub>3</sub>), 21.6 (s, Mes-CH<sub>3</sub>), 20.9 (d, <sup>2</sup>J<sub>PC</sub> = 1.9 Hz, *i*Pr-CH<sub>3</sub>), 19.0 (s, *i*Pr-CH<sub>3</sub>) ppm.

*Comment: The spectrum contains signals corresponding to residual pentane at 34.45, 22.72 and 14.28 ppm.*

<sup>13</sup>C{<sup>1</sup>H, <sup>31</sup>P} NMR (75.5 MHz, C<sub>6</sub>D<sub>6</sub>, 298 K): δ = 192.8 (d, <sup>1</sup>J<sub>RhC</sub> = 60.6 Hz, IMe-C<sub>q</sub>), 188.8 (d, <sup>1</sup>J<sub>RhC</sub> = 20.5 Hz, CCH<sub>2</sub>), 140.1 (s, Mes-C<sub>q</sub>), 137.4 (s, Mes-C<sub>q</sub>), 134.6 (s, Mes-C<sub>q</sub>), 128.0 (s, Mes-CH), 127.1 (s, Mes-CH), 122.2 (d, <sup>3</sup>J<sub>RhC</sub> = 1.6 Hz, IMe-NCH), 121.2 (d, <sup>3</sup>J<sub>RhC</sub> = 1.5 Hz, IMe-NCH), 85.9 (d, <sup>2</sup>J<sub>RhC</sub> = 1.0 Hz, CCH<sub>2</sub>), 54.4 (d, <sup>2</sup>J<sub>RhC</sub> = 0.9 Hz, *t*Bu-C<sub>q</sub>), 39.1 (d, <sup>3</sup>J<sub>RhC</sub> = 1.3 Hz, IMe-CH<sub>3</sub>), 38.7 (d, <sup>3</sup>J<sub>RhC</sub> = 0.7 Hz, IMe-CH<sub>3</sub>), 34.4 (d, <sup>3</sup>J<sub>RhC</sub> = 0.8 Hz, *t*Bu-CH<sub>3</sub>), 25.9 (d, <sup>2</sup>J<sub>RhC</sub> = 1.0 Hz, *i*Pr-CH), 24.1 (s, Mes-CH<sub>3</sub>), 23.6 (s, Mes-CH<sub>3</sub>), 21.6 (s, Mes-CH<sub>3</sub>), 20.9 (d, <sup>3</sup>J<sub>RhC</sub> = 0.4 Hz, *i*Pr-CH<sub>3</sub>), 19.0 (s, *i*Pr-CH<sub>3</sub>) ppm.

*Comment: The signals corresponding to the Mes-C<sub>q</sub> and CHCCH<sub>2</sub> nuclei bound to the boron atom could not be observed in the <sup>13</sup>C{<sup>1</sup>H, <sup>31</sup>P} NMR spectrum.*

<sup>11</sup>B NMR (128.5 MHz, C<sub>6</sub>D<sub>6</sub>, 298 K): δ = 33.6 (br s) ppm.

<sup>31</sup>P{<sup>1</sup>H} NMR (162.2 MHz, C<sub>6</sub>D<sub>6</sub>, 298 K): δ = 48.8 (d, <sup>1</sup>J<sub>RhP</sub> = 140 Hz) ppm.

HRMS (LIFDI, C<sub>30</sub>H<sub>52</sub>BN<sub>3</sub>PRh): *calcd*: m/z = 599.3041, *found*: m/z = 599.3032.

UV-vis (THF): λ<sub>abs</sub> = 396 nm.

### Synthesis of 3e<sup>Me</sup>

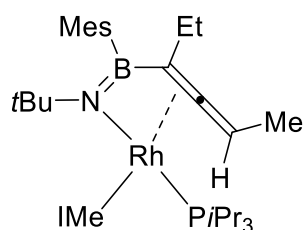

**1e** (25.0 mg, 43.0 μmol) and IMe (9.9 mg, 103 μmol) were dissolved in benzene (0.6 mL). After 30 mins at room temperature, the suspension was filtered, and all volatiles of the filtrate were removed *in vacuo*. The residue of the filtrate was treated with hexane (0.6 mL) and the resulting suspension was filtered. After storing the filtrate at -30 °C for 8 d a yellow crystalline solid formed. The solid was washed with benzene-d<sub>6</sub> and dried under reduced pressure to yield

**3e<sup>Me</sup>**. Crystals of **3e<sup>Me</sup>** suitable for X-ray diffraction were obtained by slow evaporation of a saturated hexane solution at  $-30\text{ }^{\circ}\text{C}$ .

**<sup>1</sup>H NMR** (500.1 MHz, C<sub>6</sub>D<sub>6</sub>, 298 K):  $\delta = 7.073\text{--}7.070$  (m, 1H, Mes-CH), 7.014-7.010 (m, 1H, Mes-CH), 6.09 (d,  $^3J_{\text{HH}} = 1.9$  Hz, 1H, IMe-NCH), 6.03 (d,  $^3J_{\text{HH}} = 1.9$  Hz, 1H, IMe-NCH), 5.32 (q,  $^3J_{\text{HH}} = 6.5$  Hz, 1H, CCHCH<sub>3</sub>), 3.80 (s, 3H, IMe-CH<sub>3</sub>), 3.51 (s, 3H, IMe-CH<sub>3</sub>), 3.03 (s, 3H, Mes-CH<sub>3</sub>), 2.78 (s, 3H, Mes-CH<sub>3</sub>), 2.35 (s, 3H, Mes-CH<sub>3</sub>), 2.27 (d,  $^3J_{\text{HH}} = 6.5$  Hz, 3H, CCHCH<sub>3</sub>), 2.13-2.06 (m, 1H, CCH<sub>2</sub>CH<sub>3</sub>), 1.80-1.73 (m, 3H, *i*Pr-CH), 1.71-1.64 (m, 1H, CCH<sub>2</sub>CH<sub>3</sub>), 1.26-1.20 (m, 12H, *i*Pr-CH<sub>3</sub> overlapping with CCH<sub>2</sub>CH<sub>3</sub>), 1.01-0.97 (m, 9H, *i*Pr-CH<sub>3</sub>) overlapping with 0.98 (s, 9H, *t*Bu-CH<sub>3</sub>) ppm.

**<sup>13</sup>C{<sup>1</sup>H} NMR** (125.8 MHz, C<sub>6</sub>D<sub>6</sub>, 298 K):  $\delta = 193.4$  (dd,  $^1J_{\text{RhC}} = 59.0$  Hz,  $^2J_{\text{PC}} = 17.6$  Hz, IMe-C<sub>q</sub>), 183.0 (dd,  $^1J_{\text{RhC}} = 17.4$  Hz,  $^2J_{\text{PC}} = 4.2$  Hz, CCHCH<sub>3</sub>), 145.5 (Mes-C<sub>q</sub>, detected by HMBC), 139.7 (s, Mes-C<sub>q</sub>), 138.2 (s, Mes-C<sub>q</sub>), 134.7 (s, Mes-C<sub>q</sub>), 127.9 (Mes-CH, detected by HSQC), 127.2 (s, Mes-CH), 122.0 (d,  $^3J_{\text{RhC}} = 1.4$  Hz, IMe-NCH), 121.1 (d,  $^3J_{\text{RhC}} = 1.4$  Hz, IMe-NCH), 96.04-96.03 (m, CCHCH<sub>3</sub>), 54.4 (dd,  $^2J_{\text{RhC}} = 1.2$  Hz,  $^3J_{\text{PC}} = 3.5$  Hz, *t*Bu-C<sub>q</sub>), 39.5 (d,  $^3J_{\text{RhC}} = 0.8$  Hz, IMe-CH<sub>3</sub>), 38.8 (d,  $^3J_{\text{RhC}} = 1.3$  Hz, IMe-CH<sub>3</sub>), 34.1 (dd, ( $^2J_{\text{RhC}}$  or  $^3J_{\text{PC}}$ ) = 0.6 Hz, ( $^3J_{\text{PC}}$  or  $^2J_{\text{RhC}}$ ) = 1.8 Hz, *t*Bu-CH<sub>3</sub>), 27.6 (s, CCH<sub>2</sub>CH<sub>3</sub>), 27.4 (dd,  $^1J_{\text{PC}} = 15.9$  Hz,  $^2J_{\text{RhC}} = 0.6$  Hz, *i*Pr-CH), 24.5 (s, Mes-CH<sub>3</sub>), 24.4 (s, Mes-CH<sub>3</sub>), 21.6 (s, Mes-CH<sub>3</sub>), 21.4 (d,  $^2J_{\text{PC}} = 2.8$  Hz, *i*Pr-CH<sub>3</sub>), 19.5 (d, ( $^3J_{\text{RhC}}$  or  $^2J_{\text{PC}}$ ) = 0.7 Hz, *i*Pr-CH<sub>3</sub>), 18.2 (d, ( $^3J_{\text{RhC}}$  or  $^4J_{\text{PC}}$ ) = 1.6 Hz, CCHCH<sub>3</sub>), 15.4 (d, ( $^3J_{\text{RhC}}$  or  $^4J_{\text{PC}}$ ) = 0.9 Hz, CCH<sub>2</sub>CH<sub>3</sub>) ppm.

**<sup>11</sup>B NMR** (160.5 MHz, C<sub>6</sub>D<sub>6</sub>, 298 K):  $\delta = 34.7$  (br s) ppm.

**<sup>31</sup>P{<sup>1</sup>H} NMR** (162.2 MHz, C<sub>6</sub>D<sub>6</sub>, 298 K):  $\delta = 46.6$  (d,  $^1J_{\text{RhP}} = 144$  Hz) ppm.

HRMS (LIFDI, C<sub>33</sub>H<sub>58</sub>BN<sub>3</sub>PRh): *calcd*:  $m/z = 641.3511$ , *found*:  $m/z = 641.3498$ .

### Synthesis of **4a<sup>iPr</sup>**

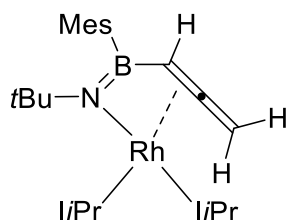

**1a** (30.0 mg, 55.6  $\mu\text{mol}$ ) and *i*Pr (28.0 mg, 184  $\mu\text{mol}$ ) were dissolved in benzene (0.6 mL). After 6 d at room temperature the suspension was filtered. The filtrate was treated with benzene (0.2 mL), leading to precipitation of a yellow solid. The supernatant solution was removed by Pasteur pipette and the residue was washed with benzene (2 x 1 mL) and hexane (1 x 2 mL).

The residual solvent was removed *in vacuo* to yield **4a**<sup>iPr</sup> as a yellow solid (10.0 mg, 15.4 μmol, 28%). Crystals of **4a**<sup>iPr</sup> suitable for X-ray diffraction were obtained by evaporation of a saturated benzene solution.

*Comment: The residue of the filtration was identified as 1,3-diisopropylimidazolium chloride by <sup>1</sup>H NMR spectroscopy.*

**<sup>1</sup>H NMR** (500.1 MHz, C<sub>6</sub>D<sub>6</sub>, 298 K): δ = 7.11-7.10 (m, 1H, Mes-CH), 7.021-7.017 (m, 1H, Mes-CH), 6.73 (sept, <sup>3</sup>J<sub>HH</sub> = 6.7 Hz, 1H, *i*Pr-CH), 6.50 (d, <sup>3</sup>J<sub>HH</sub> = 2.0 Hz, 1H, *i*Pr-NCH), 6.44 (sept, <sup>3</sup>J<sub>HH</sub> = 6.6 Hz, 1H, *i*Pr-CH), 6.28 (d, <sup>3</sup>J<sub>HH</sub> = 2.2 Hz, 1H, *i*Pr-NCH), 6.24 (d, <sup>3</sup>J<sub>HH</sub> = 2.1 Hz, 1H, *i*Pr-NCH), 6.16 (d, <sup>3</sup>J<sub>HH</sub> = 2.1 Hz, 1H, *i*Pr-NCH), 5.40-5.31 (m, 2H, *i*Pr-CH overlapping with CCH<sub>2</sub>), 4.71-4.70 (m, 1H, CCH<sub>2</sub>), 4.54 (sept, <sup>3</sup>J<sub>HH</sub> = 6.8 Hz, 1H, *i*Pr-CH), 3.08 (s, 3H, Mes-CH<sub>3</sub>), 2.89 (s, 3H, Mes-CH<sub>3</sub>), 2.37 (s, 3H, Mes-CH<sub>3</sub>), 1.86 (t, <sup>4</sup>J<sub>HH</sub> = 3.5 Hz, 1H, CHCCH<sub>2</sub>), 1.43 (d, <sup>3</sup>J<sub>HH</sub> = 6.5 Hz, 3H, *i*Pr-CH<sub>3</sub>), 1.30 (d, <sup>3</sup>J<sub>HH</sub> = 6.7 Hz, 3H, *i*Pr-CH<sub>3</sub>), 1.26 (s, 9H, *t*Bu-CH<sub>3</sub>), 1.20 (d, <sup>3</sup>J<sub>HH</sub> = 6.8 Hz, 3H, *i*Pr-CH<sub>3</sub>), 1.14 (d, <sup>3</sup>J<sub>HH</sub> = 6.9 Hz, 3H, *i*Pr-CH<sub>3</sub>), 1.02 (d, <sup>3</sup>J<sub>HH</sub> = 6.9 Hz, 3H, *i*Pr-CH<sub>3</sub>), 0.98 (d, <sup>3</sup>J<sub>HH</sub> = 6.7 Hz, 3H, *i*Pr-CH<sub>3</sub>), 0.40 (d, <sup>3</sup>J<sub>HH</sub> = 6.8 Hz, 3H, *i*Pr-CH<sub>3</sub>), 0.35 (d, <sup>3</sup>J<sub>HH</sub> = 6.7 Hz, 3H, *i*Pr-CH<sub>3</sub>) ppm.

**<sup>13</sup>C{<sup>1</sup>H} NMR** (125.8 MHz, C<sub>6</sub>D<sub>6</sub>, 298 K): δ = 192.4 (d, <sup>1</sup>J<sub>RhC</sub> = 65.7 Hz, *i*Pr-C<sub>q</sub>), 186.9 (d, <sup>1</sup>J<sub>RhC</sub> = 24.5 Hz, CCH<sub>2</sub>), 183.8 (d, <sup>1</sup>J<sub>RhC</sub> = 48.3 Hz, *i*Pr-C<sub>q</sub>), 147.7 (Mes-C<sub>q</sub>, detected by HMBC), 140.2 (s, Mes-C<sub>q</sub>), 136.8 (s, Mes-C<sub>q</sub>), 133.9 (s, Mes-C<sub>q</sub>), 127.9 (Mes-CH, detected by HSQC), 127.0 (s, Mes-CH), 117.4 (d, <sup>3</sup>J<sub>RhC</sub> = 1.8 Hz, *i*Pr-NCH), 116.4 (d, <sup>3</sup>J<sub>RhC</sub> = 0.8 Hz, *i*Pr-NCH), 115.3 (d, <sup>3</sup>J<sub>RhC</sub> = 1.1 Hz, *i*Pr-NCH), 114.8 (d, <sup>3</sup>J<sub>RhC</sub> = 1.4 Hz, *i*Pr-NCH), 85.9 (s, CCH<sub>2</sub>), 54.6 (d, <sup>2</sup>J<sub>RhC</sub> = 0.7 Hz, *t*Bu-C<sub>q</sub>), 52.8 (s, *i*Pr-CH), 50.9 (s, *i*Pr-CH), 50.497 (s, *i*Pr-CH) overlapping with 50.488 (s, *i*Pr-CH), 36.1 (s, *t*Bu-CH<sub>3</sub>), 34.0 (br s, CHCCH<sub>2</sub>), 25.0 (s, *i*Pr-CH<sub>3</sub>), 24.9 (s, *i*Pr-CH<sub>3</sub>), 24.1 (s, *i*Pr-CH<sub>3</sub>), 23.8 (s, Mes-CH<sub>3</sub>), 23.5 (s, *i*Pr-CH<sub>3</sub>), 23.4 (s, Mes-CH<sub>3</sub>), 22.8 (s, *i*Pr-CH<sub>3</sub>), 22.6 (s, *i*Pr-CH<sub>3</sub>), 22.1 (s, *i*Pr-CH<sub>3</sub>), 22.0 (s, *i*Pr-CH<sub>3</sub>), 21.6 (s, Mes-CH<sub>3</sub>) ppm.

**<sup>11</sup>B NMR** (160.5 MHz, C<sub>6</sub>D<sub>6</sub>, 298 K): δ = 31.7 (br s) ppm.

HRMS (LIFDI, C<sub>34</sub>H<sub>55</sub>BN<sub>5</sub>Rh): *calcd*: m/z = 647.3600, *found*: m/z = 647.3594.

UV-vis (THF): λ<sub>abs</sub> = 380, 430 nm.

## Synthesis of $4e^{iPr}$

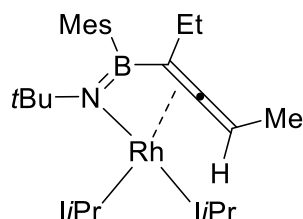

**1e** (30.0 mg, 51.6  $\mu\text{mol}$ ) and *iPr* (25.9 mg, 170  $\mu\text{mol}$ ) were dissolved in benzene (0.6 mL). After 4 d at room temperature, the suspension was filtered, and all volatiles of the filtrate were removed *in vacuo*. The residue of the filtrate was washed with hexane (3 x 1 mL) and dried under reduced pressure to yield **4e<sup>iPr</sup>** as an orange solid (9.0 mg, 13.1  $\mu\text{mol}$ , 25%). Crystals of **4e<sup>iPr</sup>** suitable for X-ray diffraction were obtained by evaporation of a saturated hexane solution.

**<sup>1</sup>H NMR** (500.1 MHz, C<sub>6</sub>D<sub>6</sub>, 298 K):  $\delta$  = 7.122-7.119 (m, 1H, Mes-CH), 7.061-7.059 (m, 1H, Mes-CH), 6.58-6.50 (m, 2H, *iPr*-CH overlapping with *iPr*-NCH), 6.36-6.28 (m, 2H, *iPr*-CH overlapping with *iPr*-NCH), 6.26 (d, <sup>3</sup>*J*<sub>HH</sub> = 2.0 Hz, 1H, *iPr*-NCH), 6.16 (d, <sup>3</sup>*J*<sub>HH</sub> = 2.1 Hz, 1H, *iPr*-NCH), 5.40 (sept, <sup>3</sup>*J*<sub>HH</sub> = 6.8 Hz, 1H, *iPr*-CH), 4.94 (qd, <sup>3</sup>*J*<sub>HH</sub> = 6.3 Hz, <sup>3</sup>*J*<sub>RhH</sub> = 1.6 Hz, 1H, CCHCH<sub>3</sub>), 4.50 (sept, <sup>3</sup>*J*<sub>HH</sub> = 6.8 Hz, 1H, *iPr*-CH), 3.08 (s, 3H, Mes-CH<sub>3</sub>), 2.88 (s, 3H, Mes-CH<sub>3</sub>), 2.39 (s, 3H, Mes-CH<sub>3</sub>), 2.30 (d, <sup>3</sup>*J*<sub>HH</sub> = 6.3 Hz, 3H, CCHCH<sub>3</sub>), 1.94-1.86 (m, 1H, CCH<sub>2</sub>CH<sub>3</sub>), 1.48 (d, <sup>3</sup>*J*<sub>HH</sub> = 6.5 Hz, 3H, *iPr*-CH<sub>3</sub>), 1.34-1.26 (m, 7H, CCH<sub>2</sub>CH<sub>3</sub> overlapping with two *iPr*-CH<sub>3</sub>), 1.24 (s, 9H, *tBu*-CH<sub>3</sub>), 1.17-1.14 (m, 6H, *iPr*-CH<sub>3</sub> overlapping with another *iPr*-CH<sub>3</sub>), 1.00 (d, <sup>3</sup>*J*<sub>HH</sub> = 6.9 Hz, 3H, *iPr*-CH<sub>3</sub>), 0.73 (t, <sup>3</sup>*J*<sub>HH</sub> = 7.4 Hz, 3H, CCH<sub>2</sub>CH<sub>3</sub>), 0.43 (d, <sup>3</sup>*J*<sub>HH</sub> = 6.8 Hz, 3H, *iPr*-CH<sub>3</sub>), 0.32 (d, <sup>3</sup>*J*<sub>HH</sub> = 6.7 Hz, 3H, *iPr*-CH<sub>3</sub>) ppm.

**<sup>13</sup>C{<sup>1</sup>H} NMR** (125.8 MHz, C<sub>6</sub>D<sub>6</sub>, 298 K):  $\delta$  = 192.3 (d, <sup>1</sup>*J*<sub>RhC</sub> = 67.2 Hz, *iPr*-C<sub>q</sub>), 184.7 (d, <sup>1</sup>*J*<sub>RhC</sub> = 48.4 Hz, *iPr*-C<sub>q</sub>), 179.2 (d, <sup>1</sup>*J*<sub>RhC</sub> = 26.5 Hz, CCHCH<sub>3</sub>), 146.8 (br s, Mes-C<sub>q</sub>), 139.7 (s, Mes-C<sub>q</sub>), 137.3 (s, Mes-C<sub>q</sub>), 133.8 (s, Mes-C<sub>q</sub>), 127.7 (s, Mes-CH), 127.2 (s, Mes-CH), 117.6 (d, <sup>3</sup>*J*<sub>RhC</sub> = 1.9 Hz, *iPr*-NCH), 116.6 (d, <sup>3</sup>*J*<sub>RhC</sub> = 0.8 Hz, *iPr*-NCH), 115.1 (d, <sup>3</sup>*J*<sub>RhC</sub> = 0.9 Hz, *iPr*-NCH), 114.6 (d, <sup>3</sup>*J*<sub>RhC</sub> = 1.4 Hz, *iPr*-NCH), 95.2 (s, CCHCH<sub>3</sub>), 54.6 (d, <sup>2</sup>*J*<sub>RhC</sub> = 0.7 Hz, *tBu*-C<sub>q</sub>), 52.6 (s, *iPr*-CH), 50.6 (d, <sup>3</sup>*J*<sub>RhC</sub> = 0.8 Hz, *iPr*-CH), 50.2 (s, *iPr*-CH), 49.7 (d, <sup>3</sup>*J*<sub>RhC</sub> = 1.3 Hz, *iPr*-CH), 49.3 (br s, CCH<sub>2</sub>CH<sub>3</sub>), 36.2 (s, *tBu*-CH<sub>3</sub>), 27.4 (s, CCH<sub>2</sub>CH<sub>3</sub>), 24.9 (s, *iPr*-CH<sub>3</sub>), 24.6 (s, *iPr*-CH<sub>3</sub>), 24.5 (s, *iPr*-CH<sub>3</sub>), 24.3 (s, *iPr*-CH<sub>3</sub>), 23.70 (s, Mes-CH<sub>3</sub>), 23.68 (s, Mes-CH<sub>3</sub>), 23.4 (s, *iPr*-CH<sub>3</sub>), 22.5 (s, *iPr*-CH<sub>3</sub>), 22.1 (s, *iPr*-CH<sub>3</sub>), 21.75 (s, *iPr*-CH<sub>3</sub>), 21.66 (s, Mes-CH<sub>3</sub>), 18.3 (d, <sup>3</sup>*J*<sub>RhC</sub> = 3.5 Hz, CCHCH<sub>3</sub>), 13.5 (s, CCH<sub>2</sub>CH<sub>3</sub>) ppm.

*Comment: The spectrum contains signals corresponding to residual hexane at 31.97, 23.06 and 14.35 and residual benzene at 128.59 ppm.*

**$^{11}\text{B}$  NMR** (160.5 MHz,  $\text{C}_6\text{D}_6$ , 298 K):  $\delta = 32.3$  (br s) ppm.

HRMS (LIFDI,  $\text{C}_{37}\text{H}_{61}\text{BN}_5\text{Rh}$ ): *calcd*:  $m/z = 689.4070$ , *found*:  $m/z = 689.4058$ .

UV-vis (THF):  $\lambda_{\text{abs}} = 351$  (shoulder), 449 nm.

## Synthesis of **5**

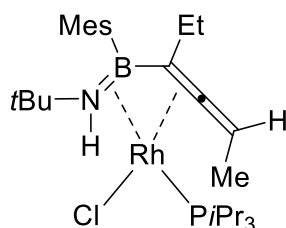

**1e** (30.0 mg, 51.6  $\mu\text{mol}$ ) was dissolved in benzene- $d_6$  (0.6 mL). After 4 d at 80  $^\circ\text{C}$ , all volatiles were removed *in vacuo* and the residue was washed with hexane (3 x 1 mL). Drying under reduced pressure yielded **5** as a yellow solid. Crystals of **5** suitable for X-ray diffraction were obtained by slow evaporation of a saturated pentane solution at  $-30$   $^\circ\text{C}$ .

*Comment: Crystals of 6 suitable for X-ray diffraction were obtained by evaporation of the hexane filtrate/washing solution.*

**$^1\text{H}$  NMR** (500.1 MHz,  $\text{C}_6\text{D}_6$ , 298 K):  $\delta = 6.95$  (s, 1H, Mes-CH), 6.87 (s, 1H, Mes-CH), 5.10 (q,  $^3J_{\text{HH}} = 6.7$  Hz, 1H, CCHCH $_3$ ), 3.36 (s, 3H, Mes-CH $_3$ ), 2.33 (s, 3H, Mes-CH $_3$ ) overlapping with 2.32 (d,  $^3J_{\text{HH}} = 6.8$  Hz, 3H, CCHCH $_3$ ), 2.28-2.20 (m, 3H, *i*Pr-CH) overlapping with 2.22 (s, 3H, Mes-CH $_3$ ), 2.11-2.10 (m, 1H, NH), 1.95-1.88 (m, 1H, Et-CH $_2$ ), 1.38 (s, 9H, *t*Bu-CH $_3$ ), 1.21-1.16 (m, 19H, *i*Pr-CH $_3$  overlapping with Et-CH $_2$ ), 1.03 (t,  $^3J_{\text{HH}} = 7.5$  Hz, 3H, Et-CH $_3$ ) ppm.

**$^{13}\text{C}\{^1\text{H}\}$  NMR** (125.8 MHz,  $\text{C}_6\text{D}_6$ , 298 K):  $\delta = 168.2$  (dd,  $^1J_{\text{RhC}} = 20.5$  Hz,  $^2J_{\text{PC}} = 4.7$  Hz, CCHCH $_3$ ), 140.4 (s, Mes-C $_q$ ), 139.0 (s, Mes-C $_q$ ), 137.1 (s, Mes-C $_q$ ), 135.3 (Mes-C $_q$ , detected by HMBC), 128.3 (Mes-CH, detected by HSQC), 127.8 (Mes-CH, detected by HSQC), 101.97-101.95 (m, CCHCH $_3$ ), 58.2 (BCEt, detected by HMBC), 54.7 (d,  $^2J_{\text{RhC}} = 0.5$  Hz, *t*Bu-C $_q$ ), 30.3 (d, ( $^3J_{\text{RhC}}$  or  $^4J_{\text{PC}}$ ) = 2.1 Hz, *t*Bu-CH $_3$ ), 28.1 (s, Mes-CH $_3$ ), 25.1 (dd,  $^1J_{\text{PC}} = 23.2$  Hz,  $^2J_{\text{RhC}} = 1.1$  Hz, *i*Pr-CH), 25.0 (s, Et-CH $_2$ ), 23.6 (s, Mes-CH $_3$ ), 21.3 (s, Mes-CH $_3$ ), 20.8 (s, *i*Pr-CH $_3$ ), 19.2 (( $^3J_{\text{RhC}}$  or  $^2J_{\text{PC}}$ ) = 1.3 Hz, *i*Pr-CH $_3$ ), 16.5 (d, ( $^3J_{\text{RhC}}$  or  $^4J_{\text{PC}}$ ) = 1.1 Hz, CCHCH $_3$ ), 13.3 (dd, ( $^3J_{\text{RhC}}$  or  $^4J_{\text{PC}}$ ) = 0.7 Hz, ( $^4J_{\text{PC}}$  or  $^3J_{\text{RhC}}$ ) = 1.6 Hz, Et-CH $_3$ ) ppm.

$^{11}\text{B}$  NMR (128.5 MHz,  $\text{C}_6\text{D}_6$ , 298 K):  $\delta = 29.3$  (br s) ppm.

$^{31}\text{P}\{^1\text{H}\}$  NMR (202.5 MHz,  $\text{C}_6\text{D}_6$ , 298 K):  $\delta = 53.9$  (d,  $^1J_{\text{RhP}} = 181$  Hz) ppm.

### Irradiation of **5**

The irradiation of a solution of **5** in benzene- $d_6$  with a mercury-xenon vapor lamp for 2 h led to complete conversion to a compound with a major signal in the  $^{11}\text{B}$  NMR spectrum at 40.4 ppm and a doublet at 47.6 ppm ( $^1J_{\text{RhP}} = 169$  Hz) in the  $^{31}\text{P}$  NMR spectrum, in addition to traces of side products. After removing all volatiles *in vacuo* the residue was dissolved in pentane. Crystals of **7** suitable for X-ray diffraction were obtained by slow evaporation of this solution at  $-30$  °C.

### Synthesis of **1b(IME)**

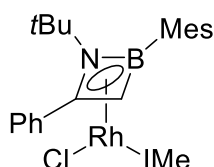

**1b** (30.0 mg, 49.8  $\mu\text{mol}$ ) and IME (4.8 mg, 49.9  $\mu\text{mol}$ ) were dissolved in benzene (0.6 mL). After 2 h at room temperature, all volatiles were removed *in vacuo*. The residue was washed with hexane (3 x 1.5 mL), dried under reduced pressure and dissolved in benzene- $d_6$  (0.6 mL). After 6 d at room temperature, an orange solid precipitated. The supernatant solution was removed by Pasteur pipette. The residue was washed with benzene (ca. 0.3 mL) and dried under reduced pressure to yield **1b(IME)**.

$^1\text{H}$  NMR (500.1 MHz,  $\text{C}_6\text{D}_6$ , 298 K):  $\delta = 8.14$ - $8.12$  (m, 2H, Ph-CH), 7.13-7.06 (m, 3H, Ph-CH), 6.92 (s, 2H, Mes-CH), 5.78 (s, 2H, IME-NCH), 3.60 (s, 3H, Mes- $\text{CH}_3$ ), 3.38 (s, 6H, IME- $\text{CH}_3$ ), 3.02 (s, 1H, Aza-CH), 2.75 (s, 3H, Mes- $\text{CH}_3$ ), 2.21 (s, 3H, Mes- $\text{CH}_3$ ), 1.33 (s, 9H, tBu- $\text{CH}_3$ ) ppm.

$^{13}\text{C}\{^1\text{H}\}$  NMR (125.8 MHz,  $\text{C}_6\text{D}_6$ , 298 K):  $\delta = 181.7$  (d,  $^1J_{\text{RhC}} = 68.1$  Hz, IME- $\text{C}_q$ ), 141.8 (s, Mes- $\text{C}_q$ ), 140.9 (s, Mes- $\text{C}_q$ ), 138.1 (s, Mes- $\text{C}_q$ ), 135.5 (s, Ph- $\text{C}_q$ ), 132.2 (Mes- $\text{C}_q$ , detected by HMBC), 131.1 (s, Ph-CH), 129.1 (s, Ph-CH), 128.7 (s, Mes-CH), 127.9 (Ph-CH, detected by HSQC), 127.7 (s, Mes-CH), 121.4 (s, IME-NCH), 103.5 (d,  $^1J_{\text{RhC}} = 14.6$  Hz, Aza- $\text{C}_q$ ), 56.4 (s,



*t*Bu-C<sub>q</sub>), 47.7 (br s, Aza-CH), 37.8 (s, IMe-CH<sub>3</sub>), 29.6 (s, *t*Bu-CH<sub>3</sub>), 26.7 (s, Mes-CH<sub>3</sub>), 24.0 (s, Mes-CH<sub>3</sub>), 21.3 (s, Mes-CH<sub>3</sub>) ppm.

<sup>11</sup>B NMR (128.5 MHz, C<sub>6</sub>D<sub>6</sub>, 298 K):  $\delta = 20.3$  (br s) ppm.

### Reaction of **1a** with PEt<sub>3</sub>

**1a** (21.0 mg, 38.9  $\mu$ mol) was dissolved in benzene-d<sub>6</sub> (0.5 mL) and PEt<sub>3</sub> (0.03 mL, 207  $\mu$ mol) was added. After 30 mins at room temperature, complete conversion to compound **2a(PEt<sub>3</sub>)** was observed by <sup>11</sup>B and <sup>31</sup>P NMR spectroscopy (assigned on the basis of similarity to **2a**).

<sup>11</sup>B NMR (128.5 MHz, C<sub>6</sub>D<sub>6</sub>, 298 K):  $\delta = 68.1$  (br s) ppm.

<sup>31</sup>P{<sup>1</sup>H} NMR (162.2 MHz, C<sub>6</sub>D<sub>6</sub>, 298 K):  $\delta = 12.5$  (d, <sup>1</sup>J<sub>RhP</sub> = 127 Hz, 2P) ppm.

*Comment: The <sup>31</sup>P{<sup>1</sup>H} NMR spectrum contains signals corresponding to P<sup>i</sup>Pr<sub>3</sub> at 19.5 ppm and PEt<sub>3</sub> at -19.7 ppm.*

### Reaction of **1a** with PCy<sub>3</sub>

**1a** (20.0 mg, 37.1  $\mu$ mol) and PCy<sub>3</sub> (21.3 mg, 76.0  $\mu$ mol) were dissolved in toluene (0.6 mL). The reaction mixture was heated at 80 °C for 2 d and then all volatiles were removed *in vacuo*. The residue was dissolved again in toluene (0.6 mL) and heated at 80 °C for 1 d. Again all volatiles were removed *in vacuo*, the residue was dissolved in toluene (0.6 mL) and heated at 80 °C for 8 h. Almost complete conversion to compound **1a(PCy<sub>3</sub>)** was observed (assigned by <sup>11</sup>B and <sup>31</sup>P NMR spectroscopy on the basis of similarity to **1a**).

<sup>11</sup>B NMR (128.5 MHz, toluene, 298 K):  $\delta = 20.0$  (br s) ppm.

<sup>31</sup>P{<sup>1</sup>H} NMR (162.2 MHz, toluene, 298 K):  $\delta = 49.0$  (d, <sup>1</sup>J<sub>RhP</sub> = 197 Hz) ppm.

*Comment: The <sup>31</sup>P{<sup>1</sup>H} NMR spectrum contains signals corresponding to starting material **1a** at 60.4 (d, <sup>1</sup>J<sub>RhP</sub> = 197 Hz) ppm, P<sup>i</sup>Pr<sub>3</sub> at 18.8 ppm and PCy<sub>3</sub> at 9.0 ppm.*

## NMR spectra

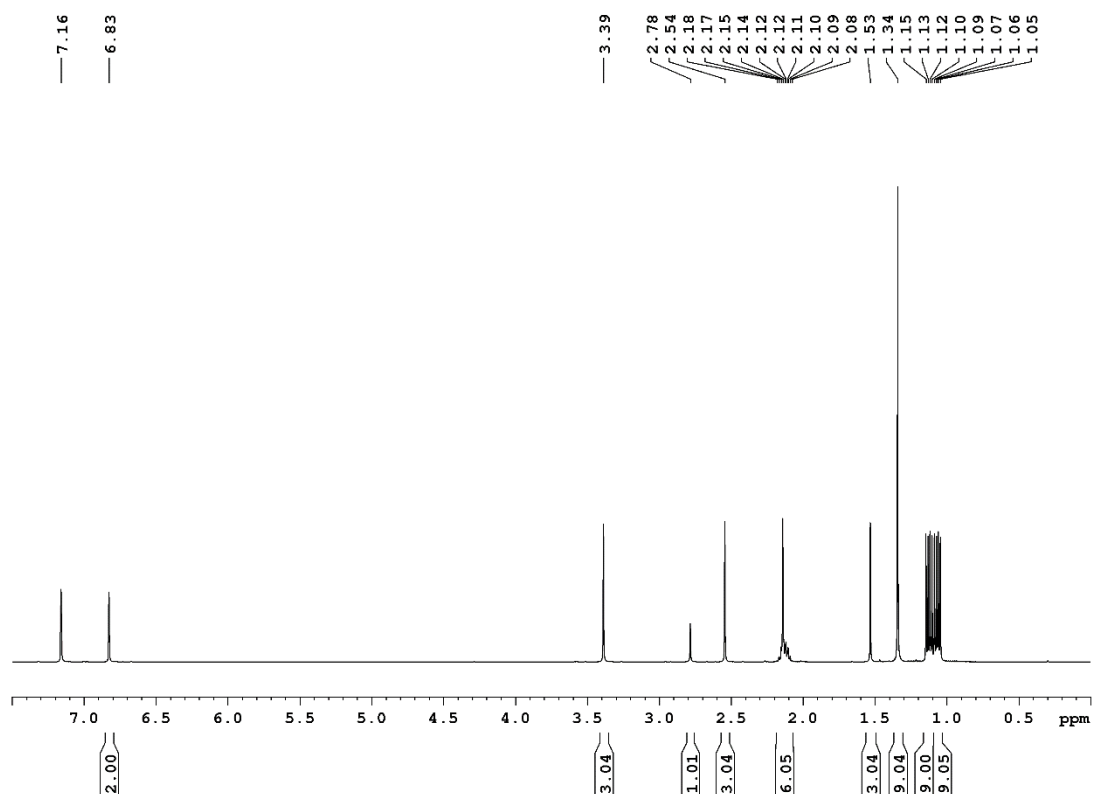

**Figure S1.** <sup>1</sup>H NMR (500.1 MHz, C<sub>6</sub>D<sub>6</sub>, 298 K) spectrum of **1a**

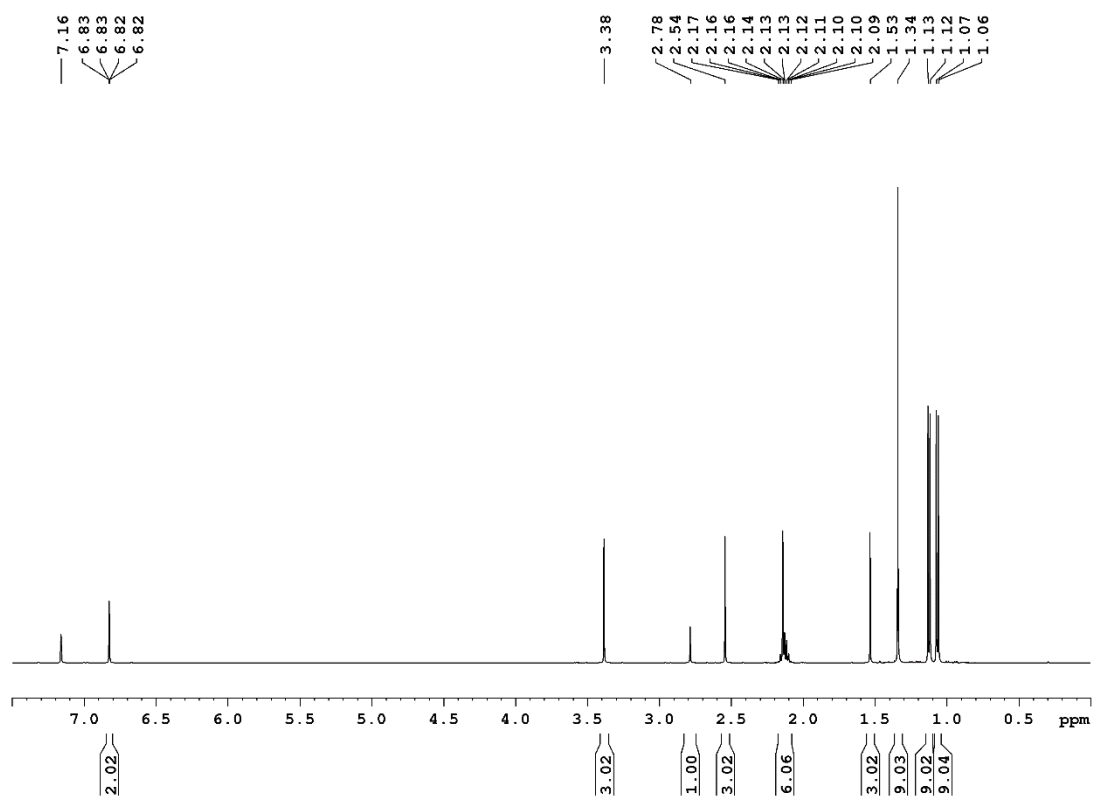

**Figure S2.** <sup>1</sup>H{<sup>31</sup>P} NMR (500.1 MHz, C<sub>6</sub>D<sub>6</sub>, 298 K) spectrum of **1a**.

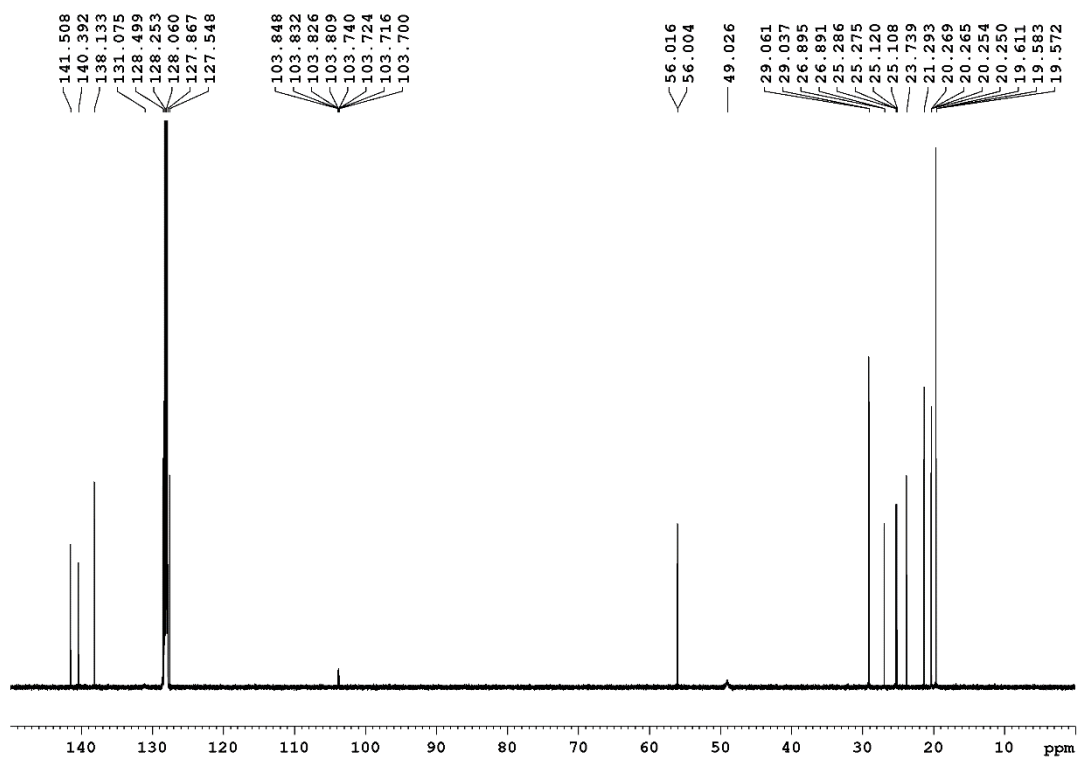

Figure S3.  $^{13}\text{C}\{^1\text{H}\}$  NMR (125.8 MHz,  $\text{C}_6\text{D}_6$ , 298 K) spectrum of **1a**.

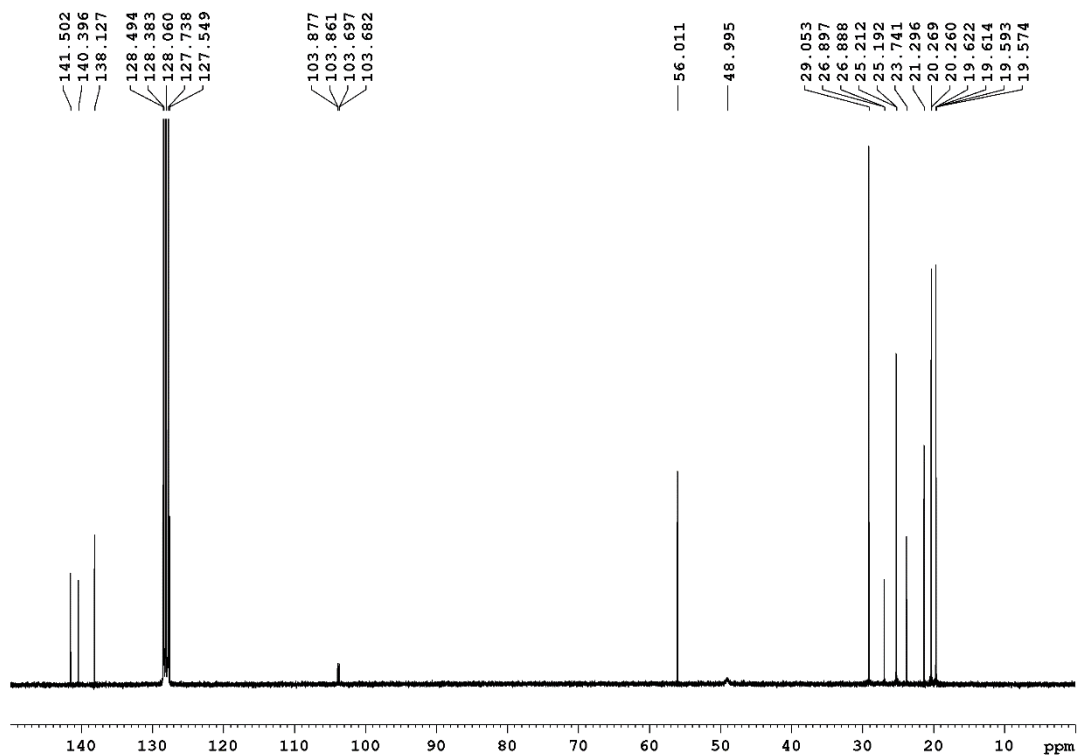

Figure S4.  $^{13}\text{C}\{^1\text{H}, ^{31}\text{P}\}$  NMR (75.5 MHz,  $\text{C}_6\text{D}_6$ , 298 K) spectrum of **1a**.

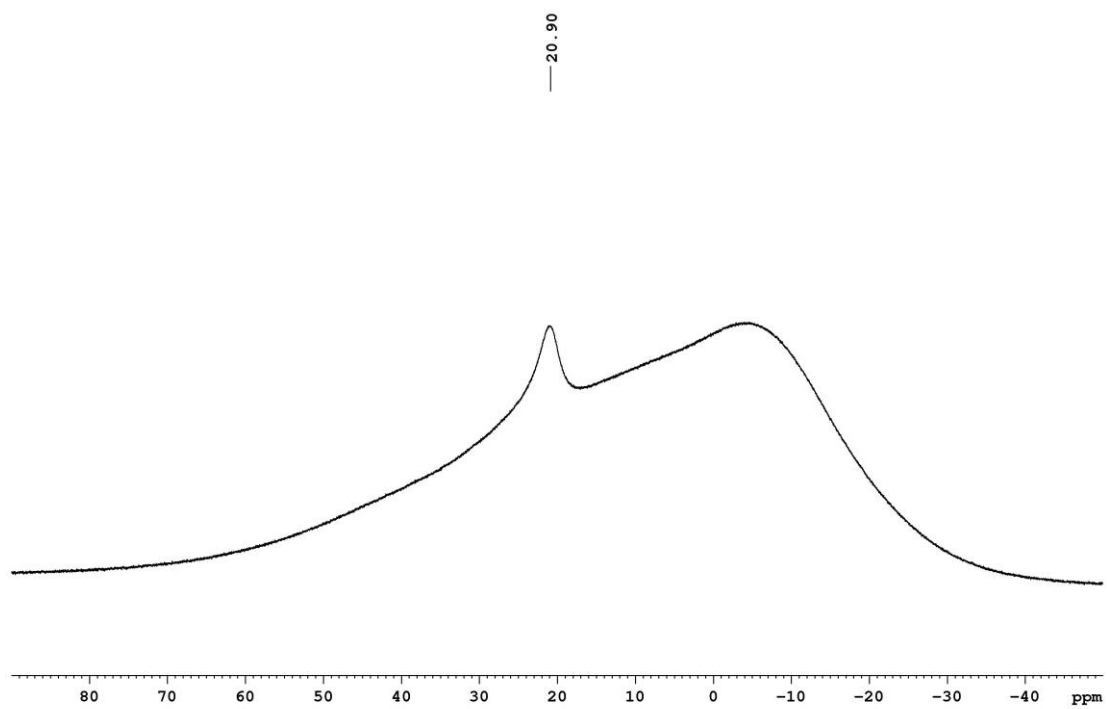

**Figure S5.**  $^{11}\text{B}$  NMR (160.5 MHz,  $\text{C}_6\text{D}_6$ , 298 K) spectrum of **1a**.

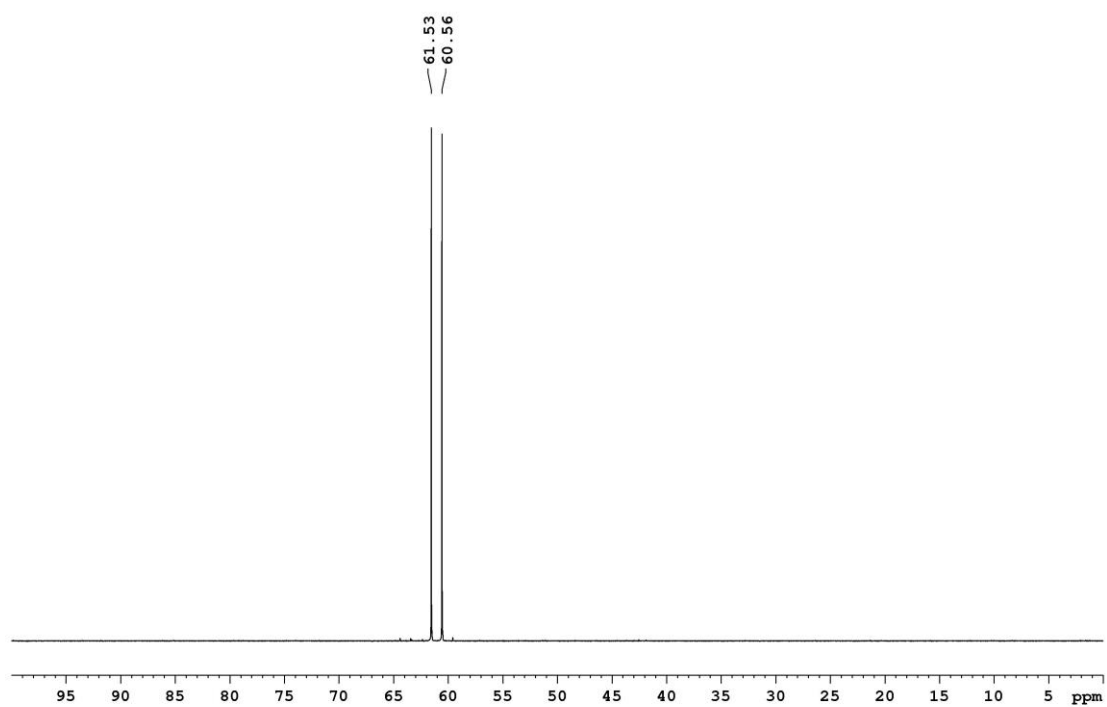

**Figure S6.**  $^{31}\text{P}\{^1\text{H}\}$  NMR (202.5 MHz,  $\text{C}_6\text{D}_6$ , 298 K) spectrum of **1a**.

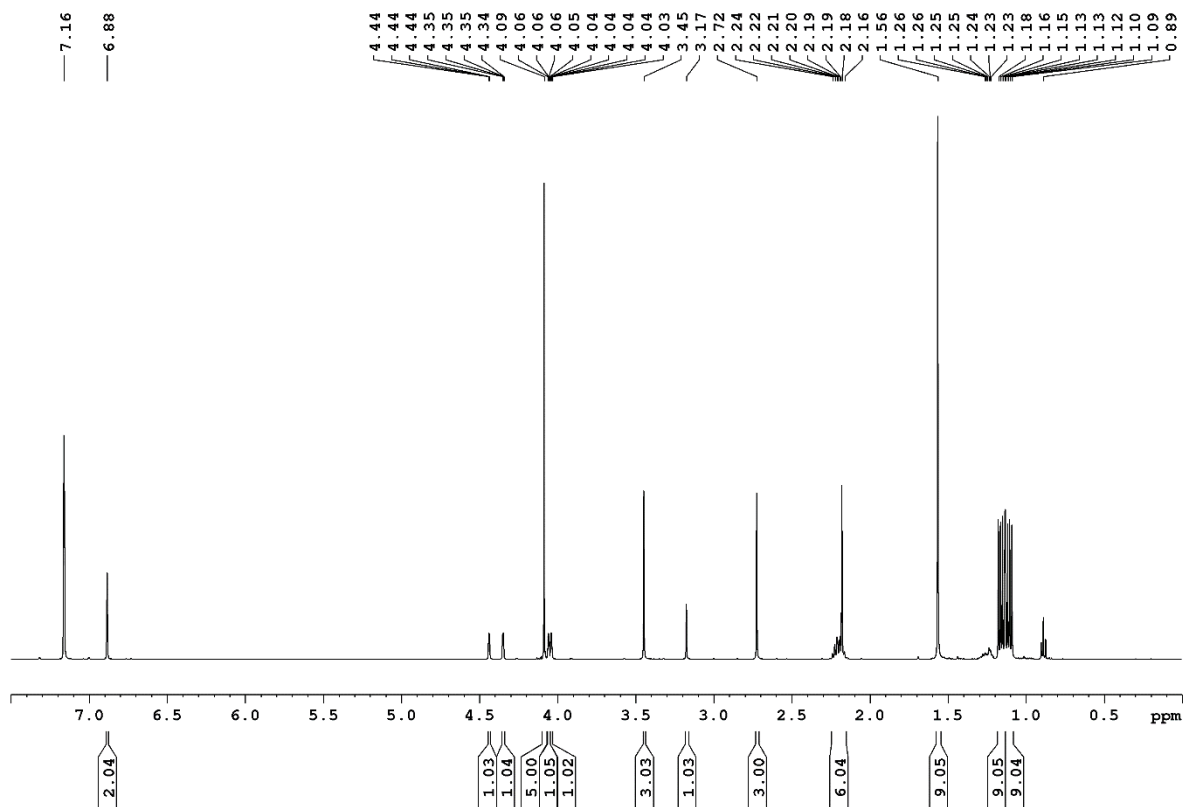

Figure S7.  $^1\text{H}$  NMR (500.1 MHz,  $\text{C}_6\text{D}_6$ , 298 K) spectrum of **1c**.

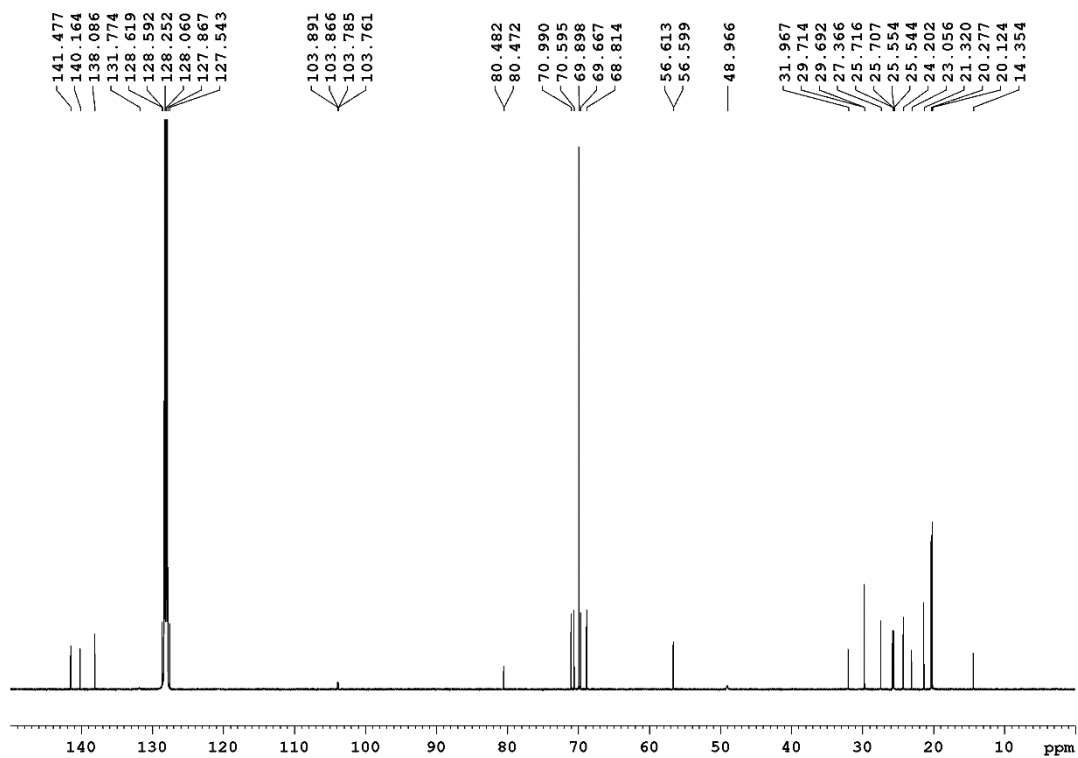

Figure S8.  $^{13}\text{C}\{^1\text{H}\}$  NMR (125.8 MHz,  $\text{C}_6\text{D}_6$ , 298 K) spectrum of **1c**.

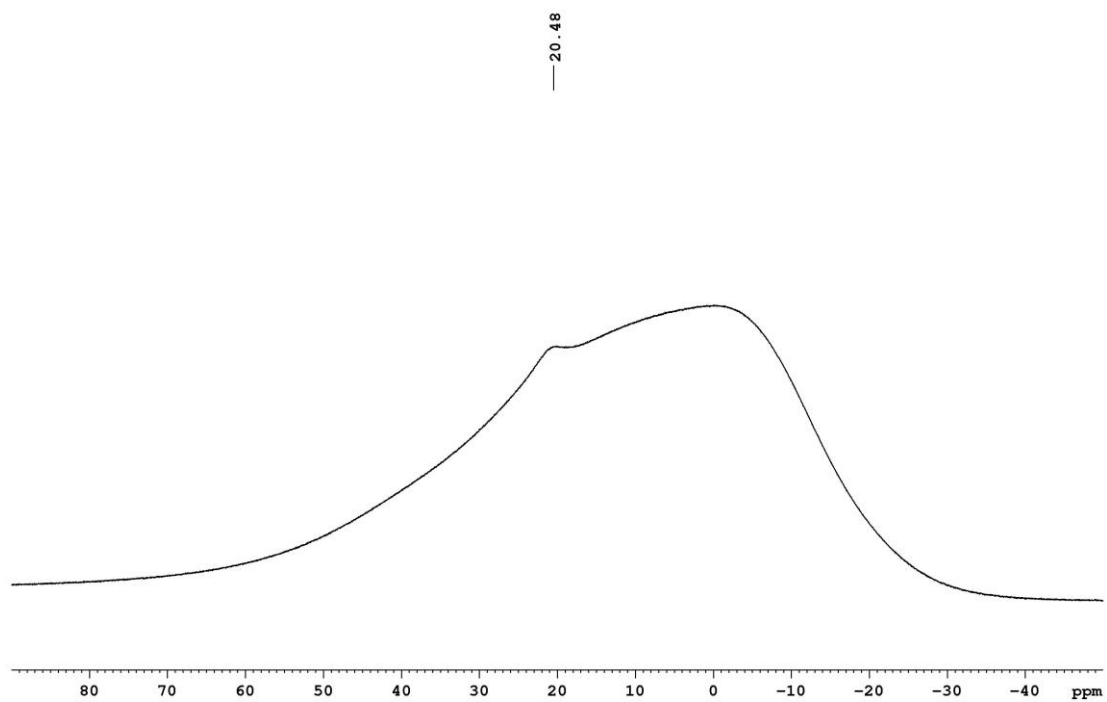

**Figure S9.**  $^{11}\text{B}$  NMR (160.5 MHz,  $\text{C}_6\text{D}_6$ , 298 K) spectrum of **1c**.

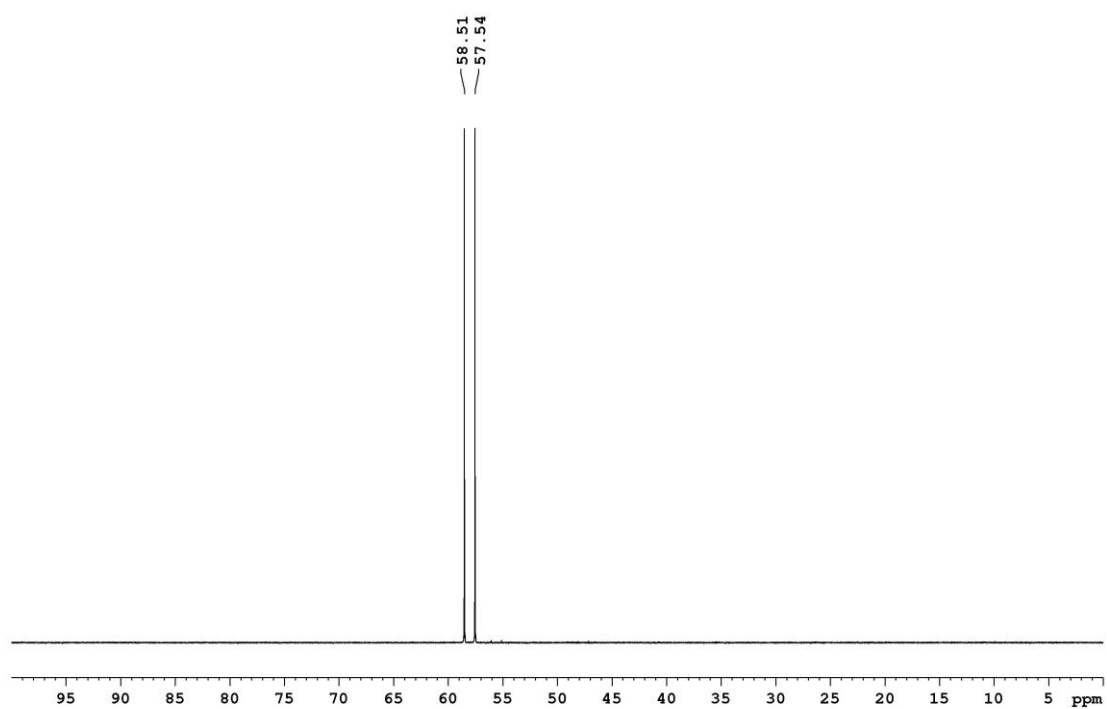

**Figure S10.**  $^{31}\text{P}\{^1\text{H}\}$  NMR (202.5 MHz,  $\text{C}_6\text{D}_6$ , 298 K) spectrum of **1c**.

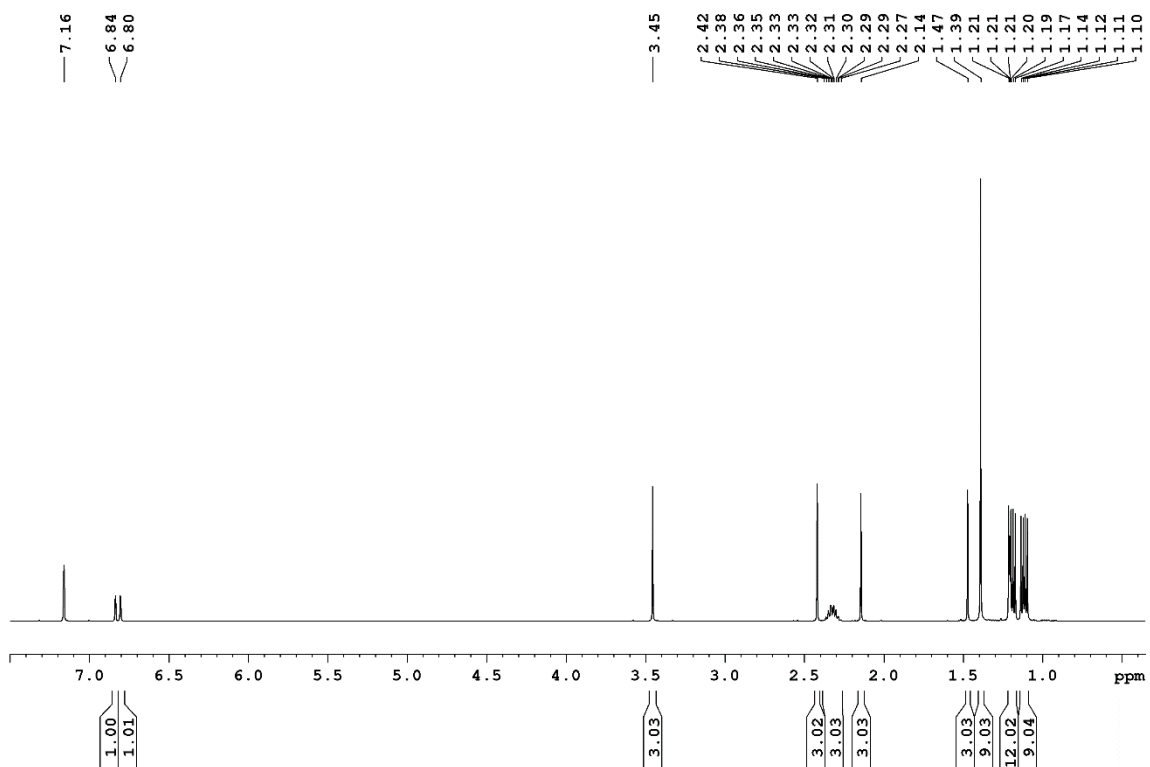

**Figure S11.**  $^1\text{H}$  NMR (500.1 MHz,  $\text{C}_6\text{D}_6$ , 298 K) spectrum of **1d**.

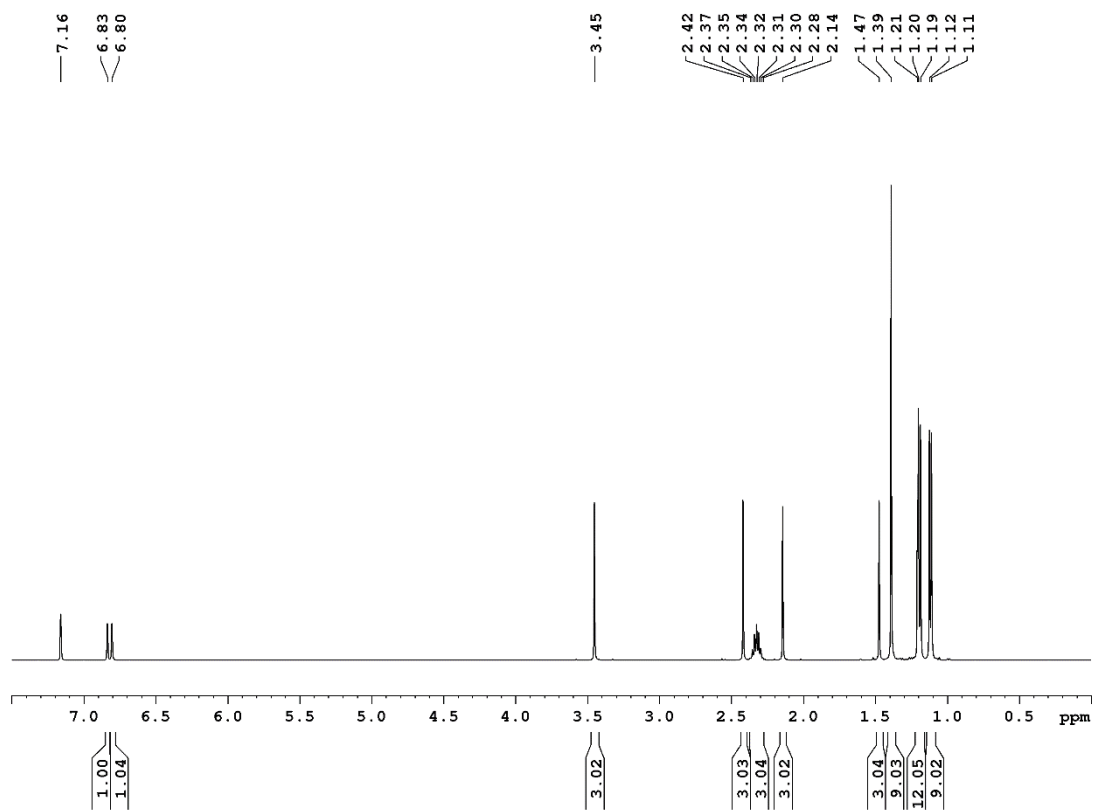

**Figure S12.**  $^1\text{H}\{^{31}\text{P}\}$  NMR (500.1 MHz,  $\text{C}_6\text{D}_6$ , 298 K) spectrum of **1d**.

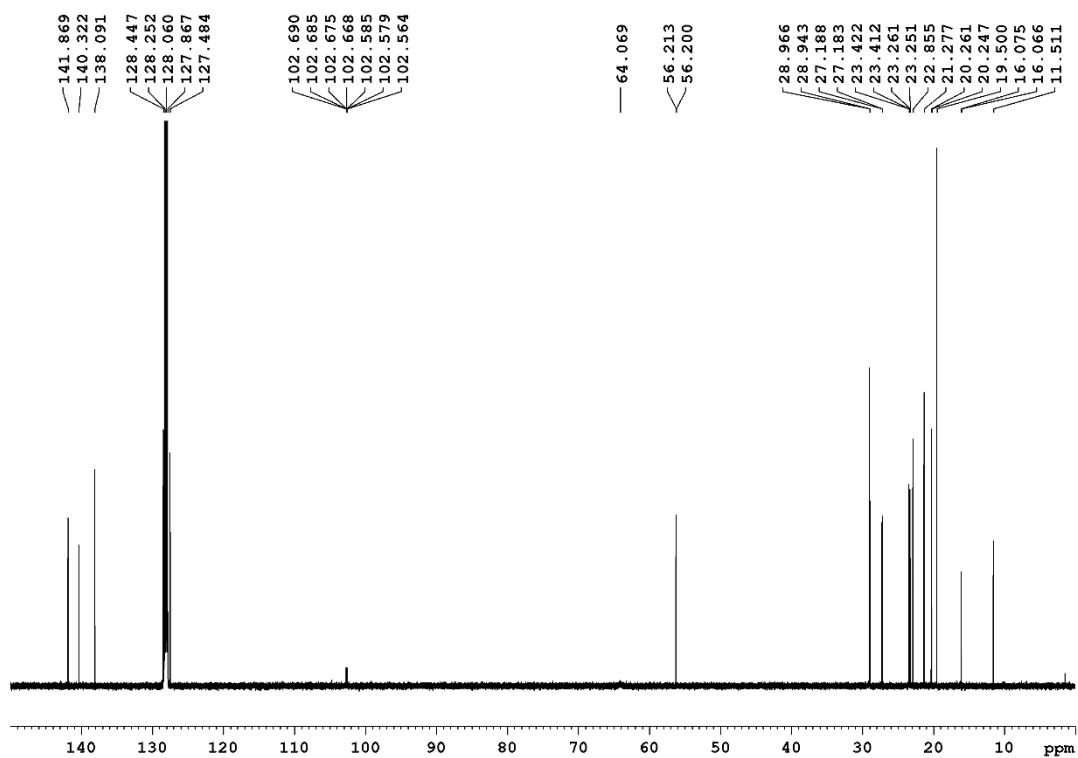

**Figure S13.**  $^{13}\text{C}\{^1\text{H}\}$  NMR (125.8 MHz,  $\text{C}_6\text{D}_6$ , 298 K) spectrum of **1d**.

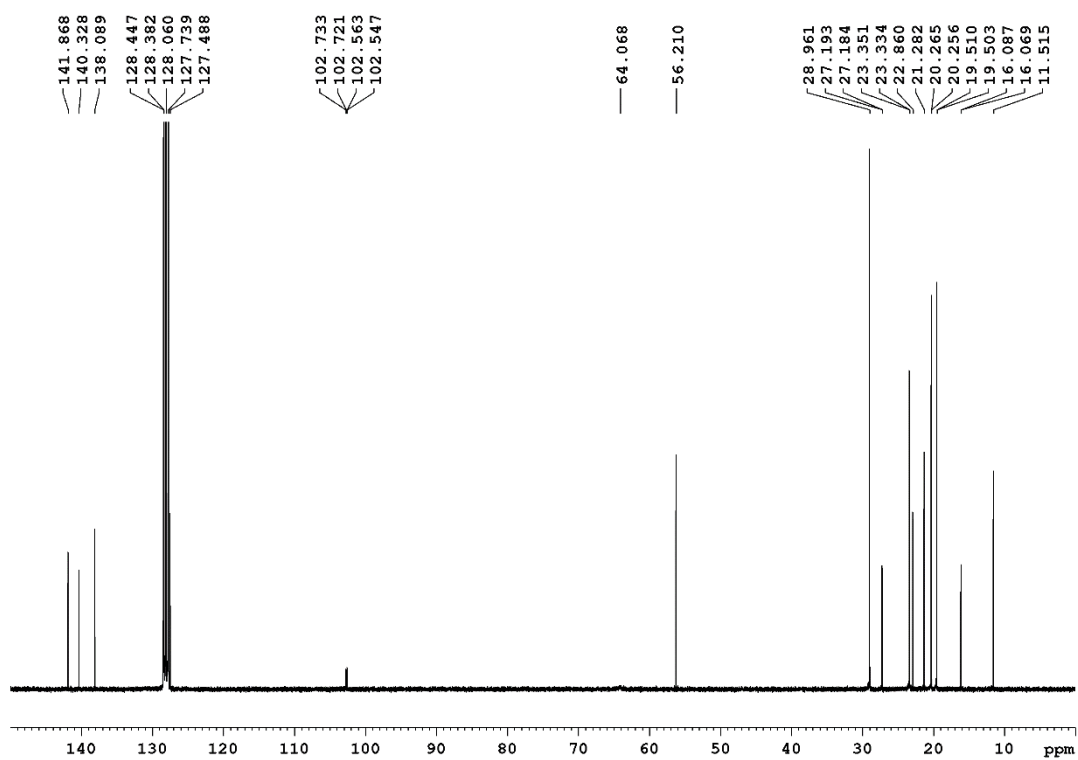

**Figure S14.**  $^{13}\text{C}\{^1\text{H}, ^{31}\text{P}\}$  NMR (75.5 MHz,  $\text{C}_6\text{D}_6$ , 298 K) spectrum of **1d**.



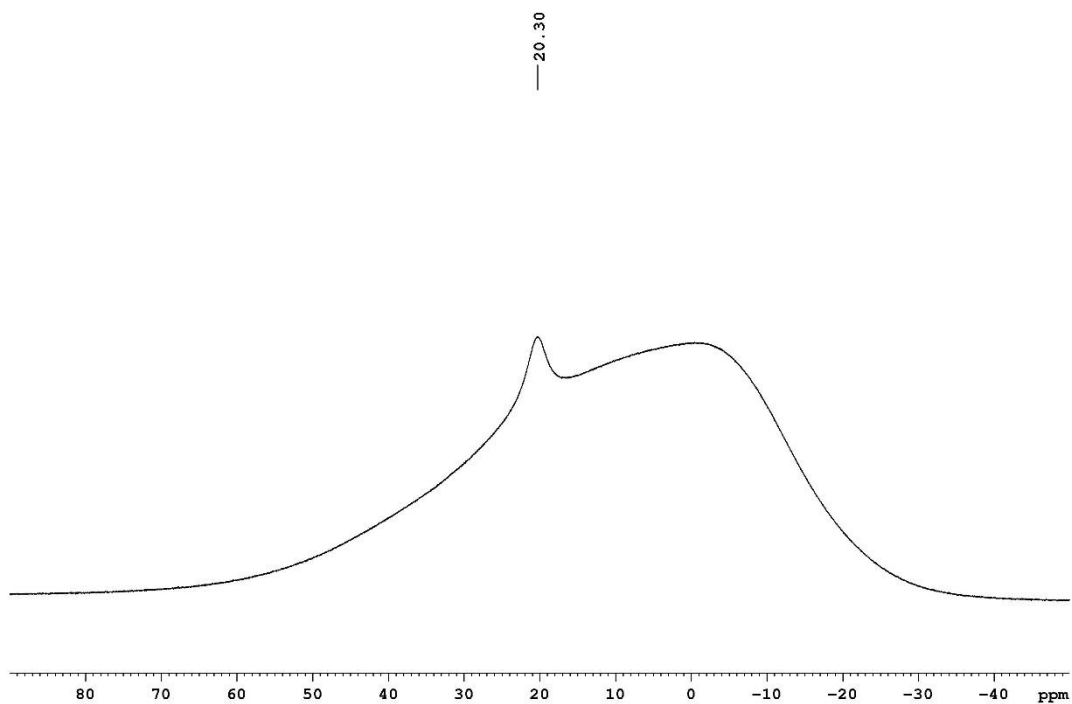

**Figure S15.**  $^{11}\text{B}$  NMR (160.5 MHz,  $\text{C}_6\text{D}_6$ , 298 K) spectrum of **1d**.

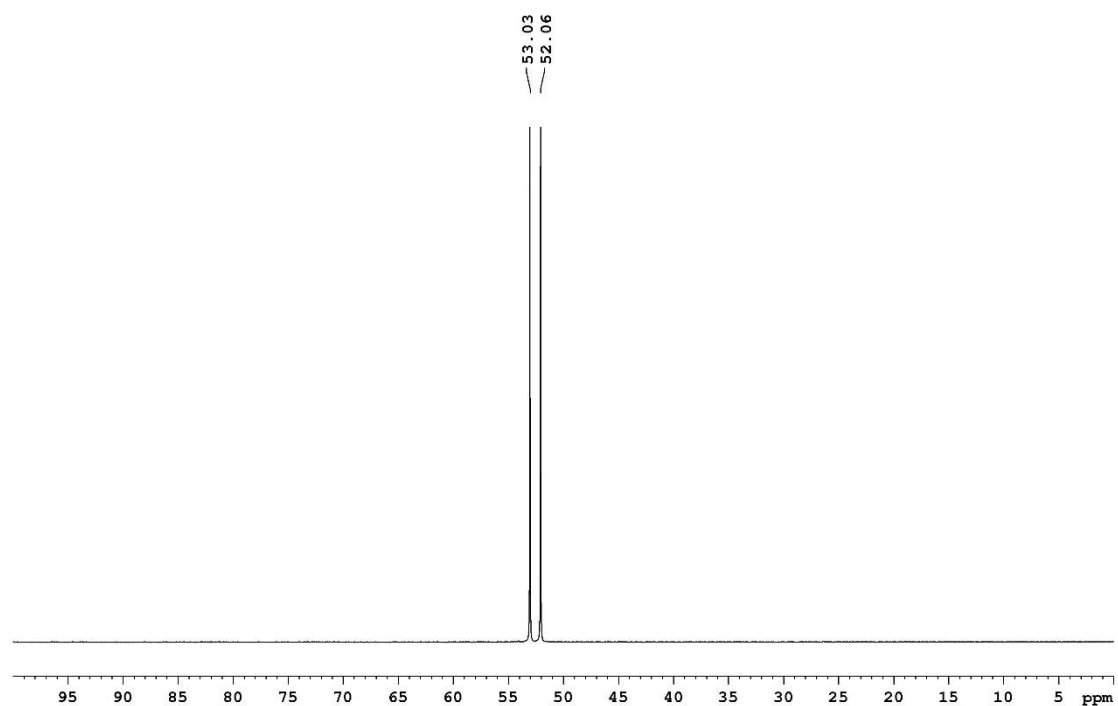

**Figure S16.**  $^{31}\text{P}\{^1\text{H}\}$  NMR (202.5 MHz,  $\text{C}_6\text{D}_6$ , 298 K) spectrum of **1d**.

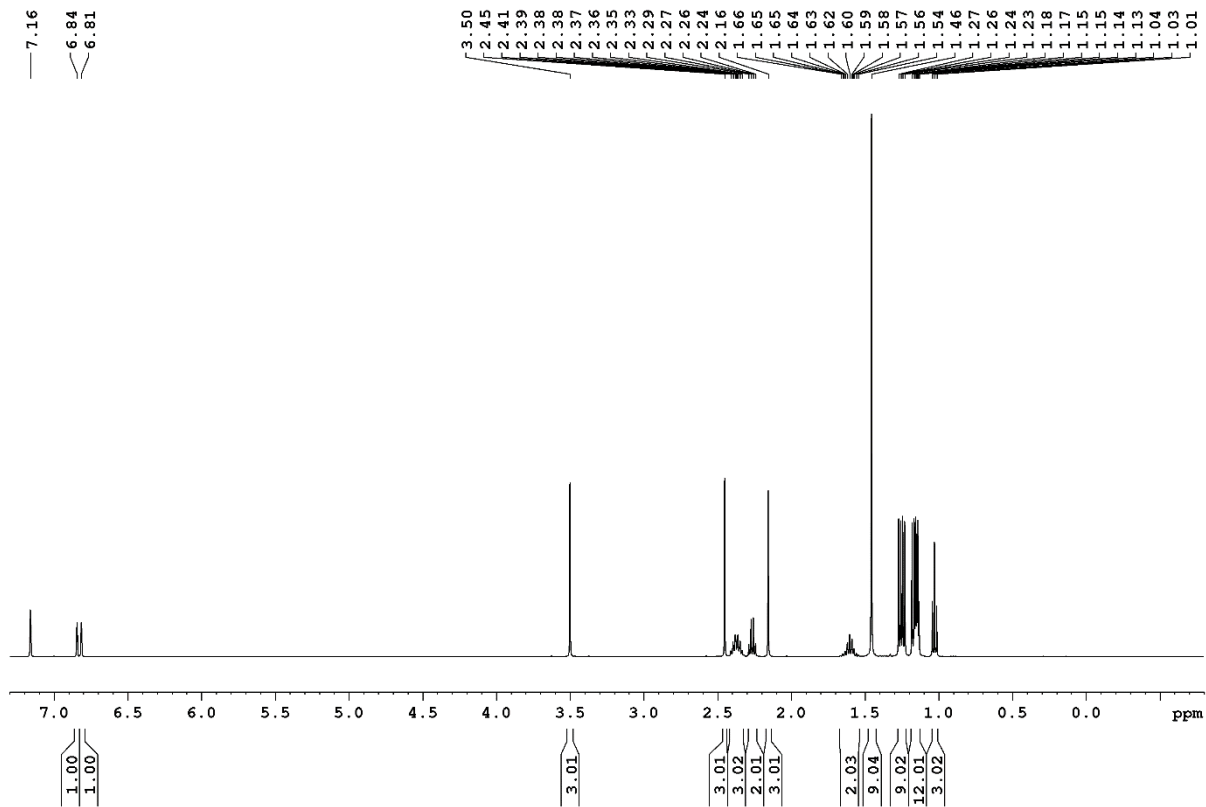

Figure S17.  $^1\text{H}$  NMR (500.1 MHz,  $\text{C}_6\text{D}_6$ , 298 K) spectrum of **1e**.

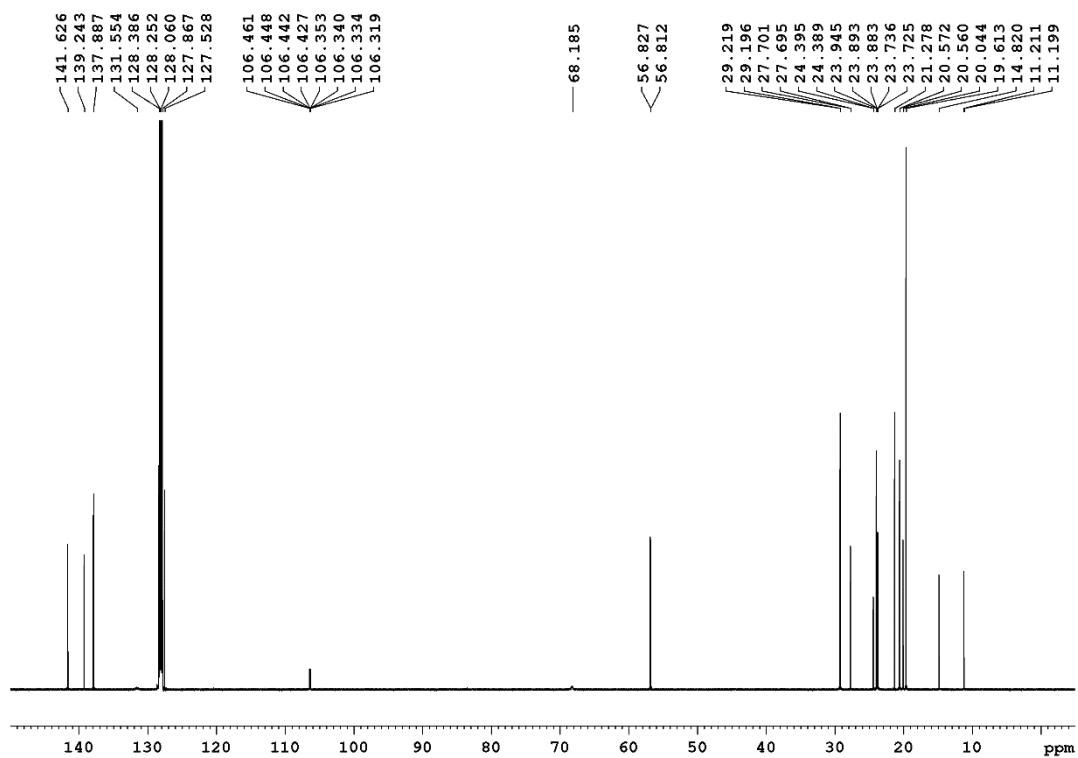

Figure S18.  $^{13}\text{C}\{^1\text{H}\}$  NMR (125.8 MHz,  $\text{C}_6\text{D}_6$ , 298 K) spectrum of **1e**.

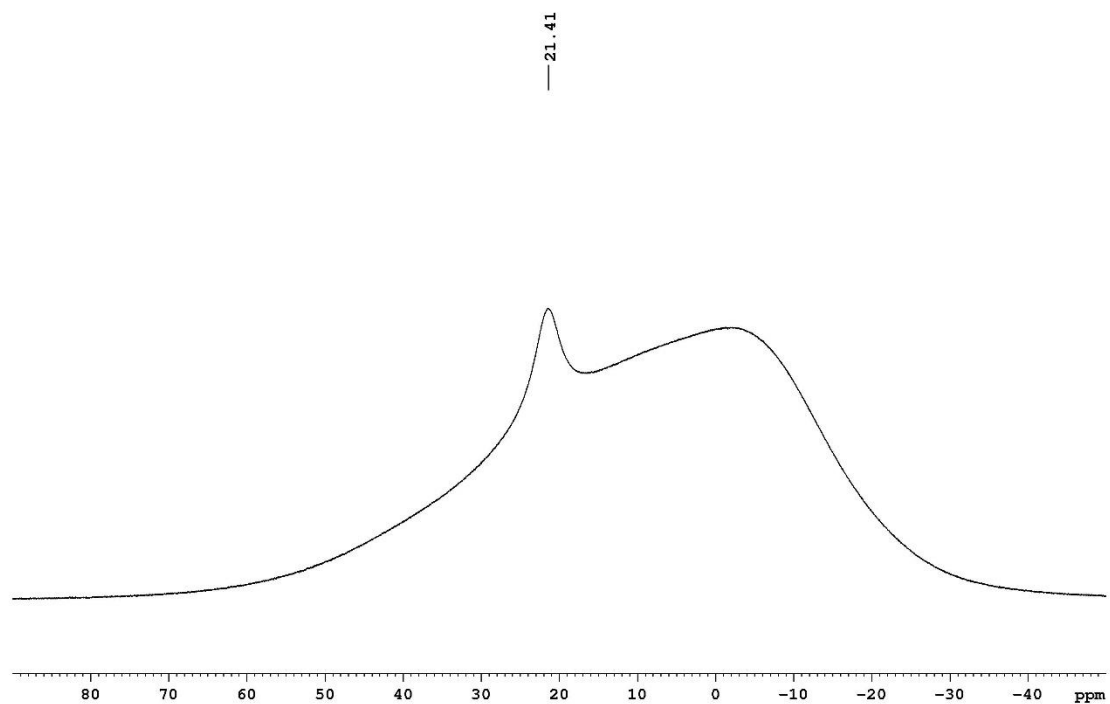

**Figure S19.**  $^{11}\text{B}$  NMR (160.5 MHz,  $\text{C}_6\text{D}_6$ , 298 K) spectrum of **1e**.

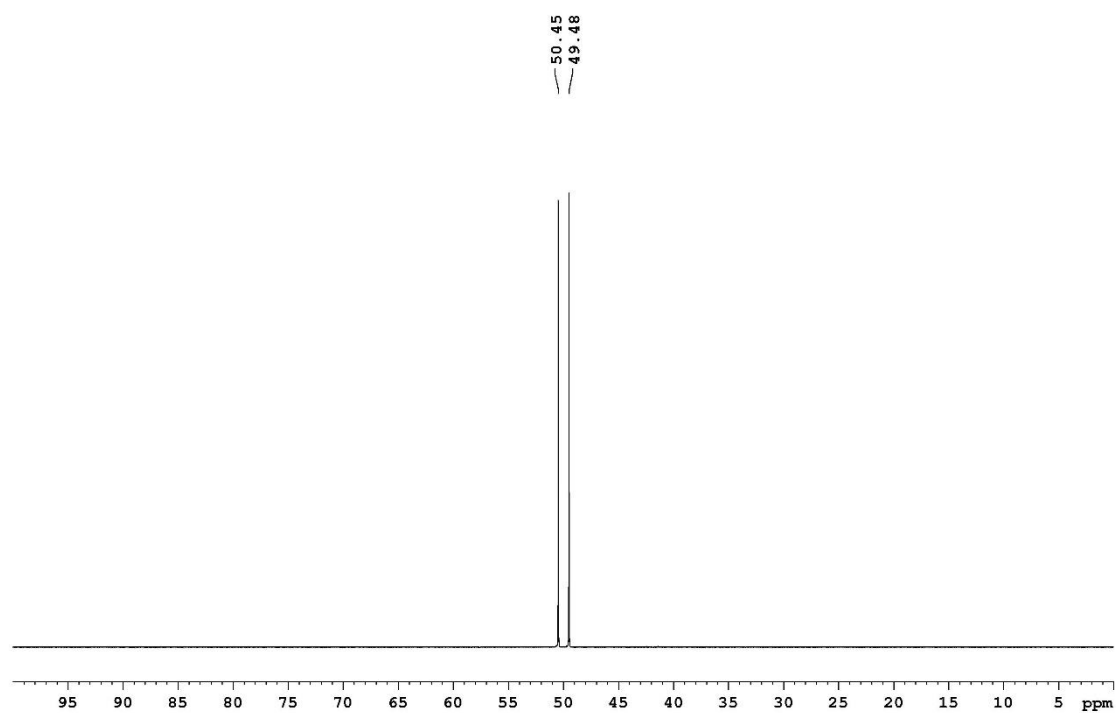

**Figure S20.**  $^{31}\text{P}\{^1\text{H}\}$  NMR (202.5 MHz,  $\text{C}_6\text{D}_6$ , 298 K) spectrum of **1e**.

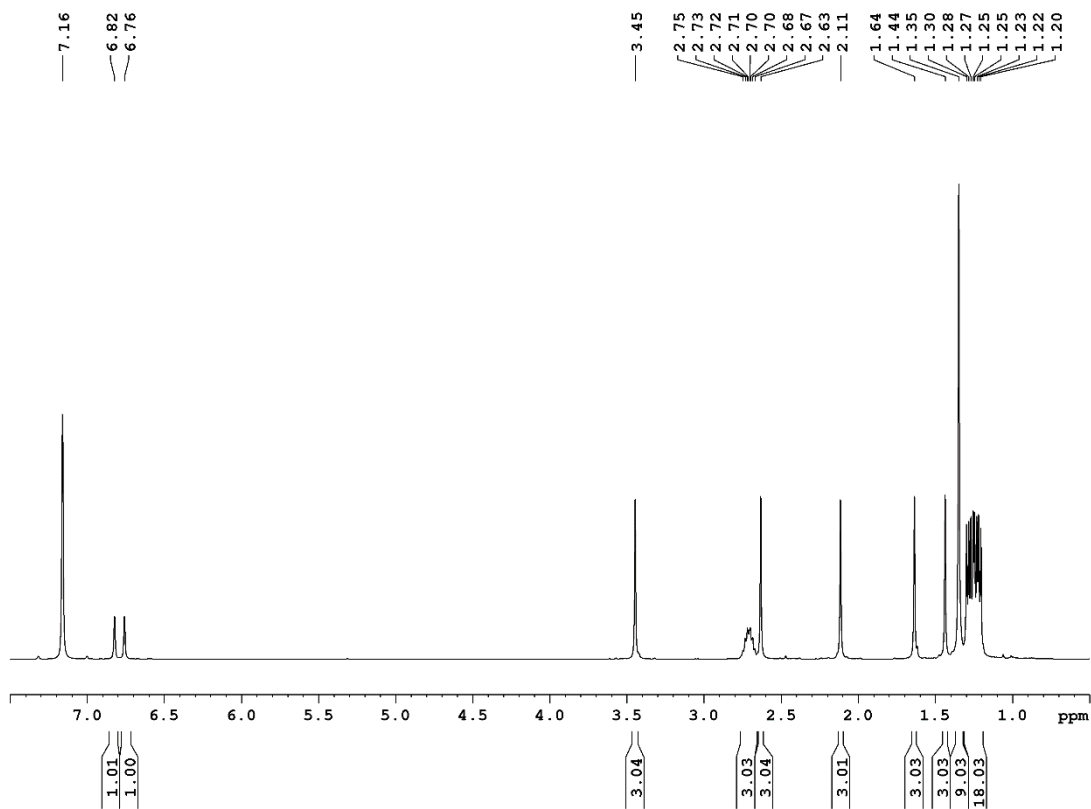

**Figure S21.**  $^1\text{H}$  NMR (500.1 MHz,  $\text{C}_6\text{D}_6$ , 298 K) spectrum of **1f**.

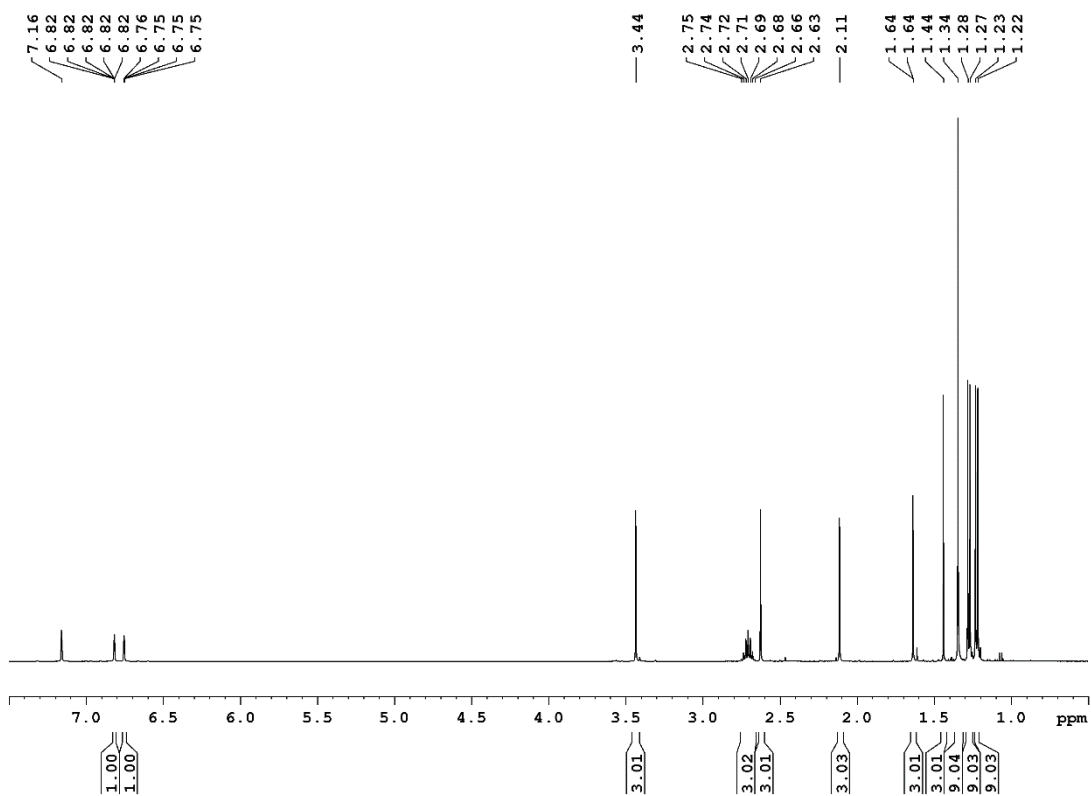

**Figure S22.**  $^1\text{H}\{^{31}\text{P}\}$  NMR (500.1 MHz,  $\text{C}_6\text{D}_6$ , 298 K) spectrum of **1f**.

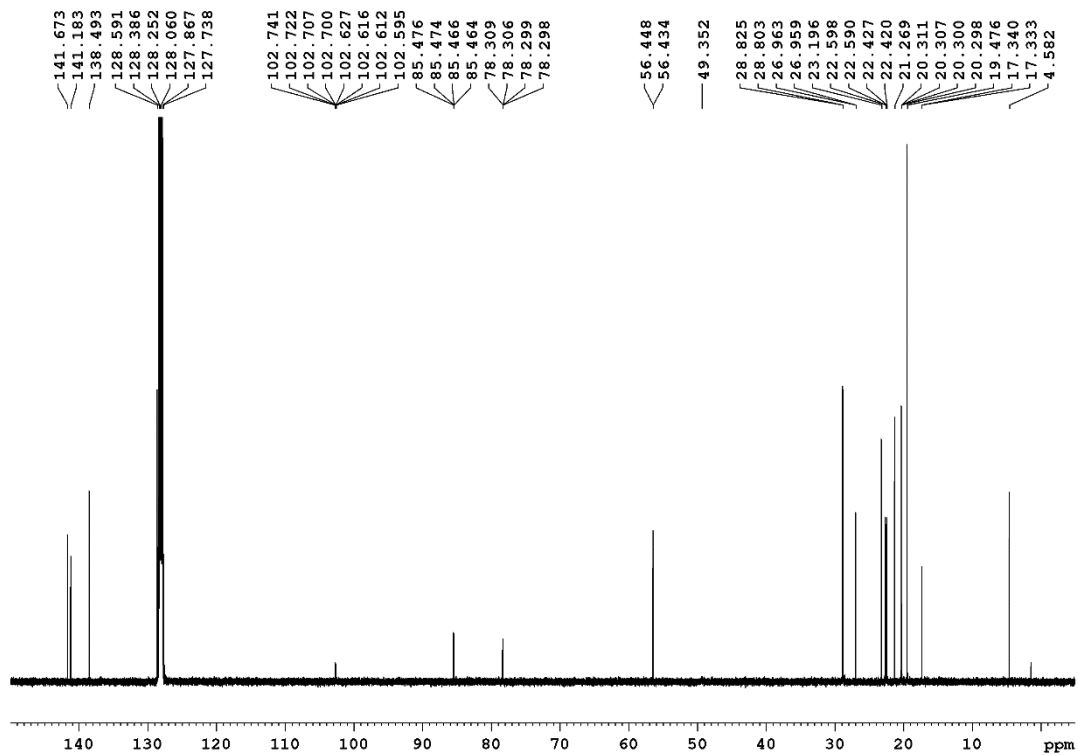

Figure S23.  $^{13}\text{C}\{^1\text{H}\}$  NMR (125.8 MHz,  $\text{C}_6\text{D}_6$ , 298 K) spectrum of **1f**.

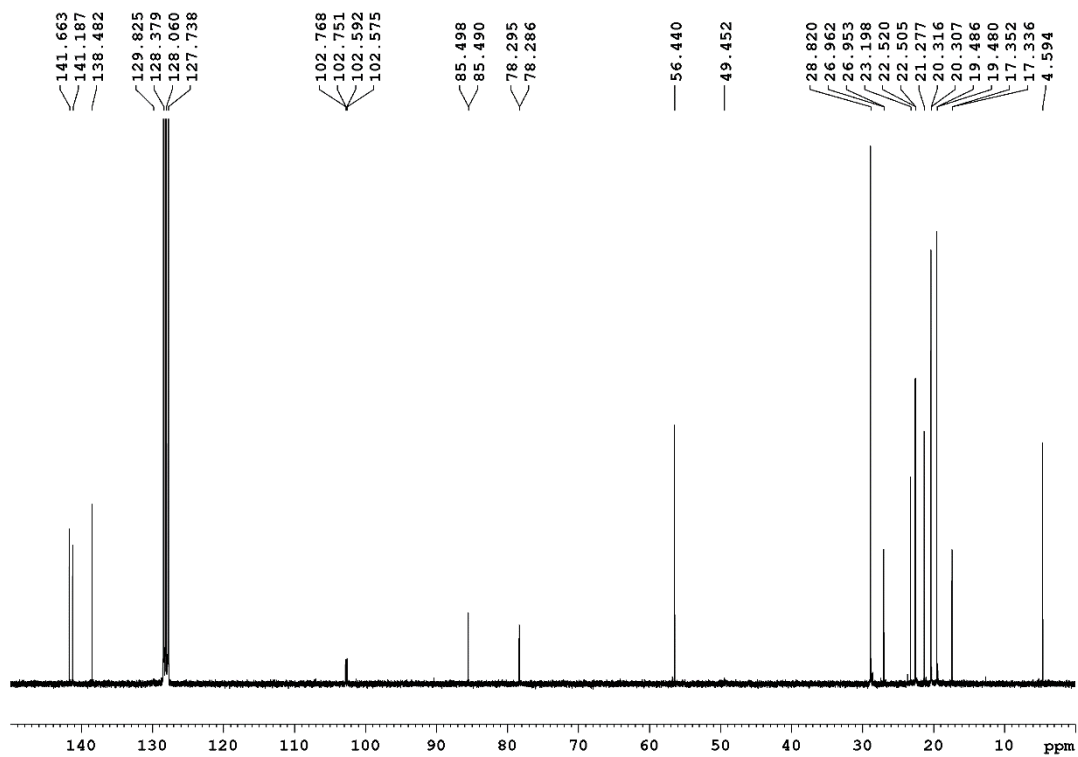

Figure S24.  $^{13}\text{C}\{^1\text{H}, ^{31}\text{P}\}$  NMR (75.5 MHz,  $\text{C}_6\text{D}_6$ , 298 K) spectrum of **1f**.

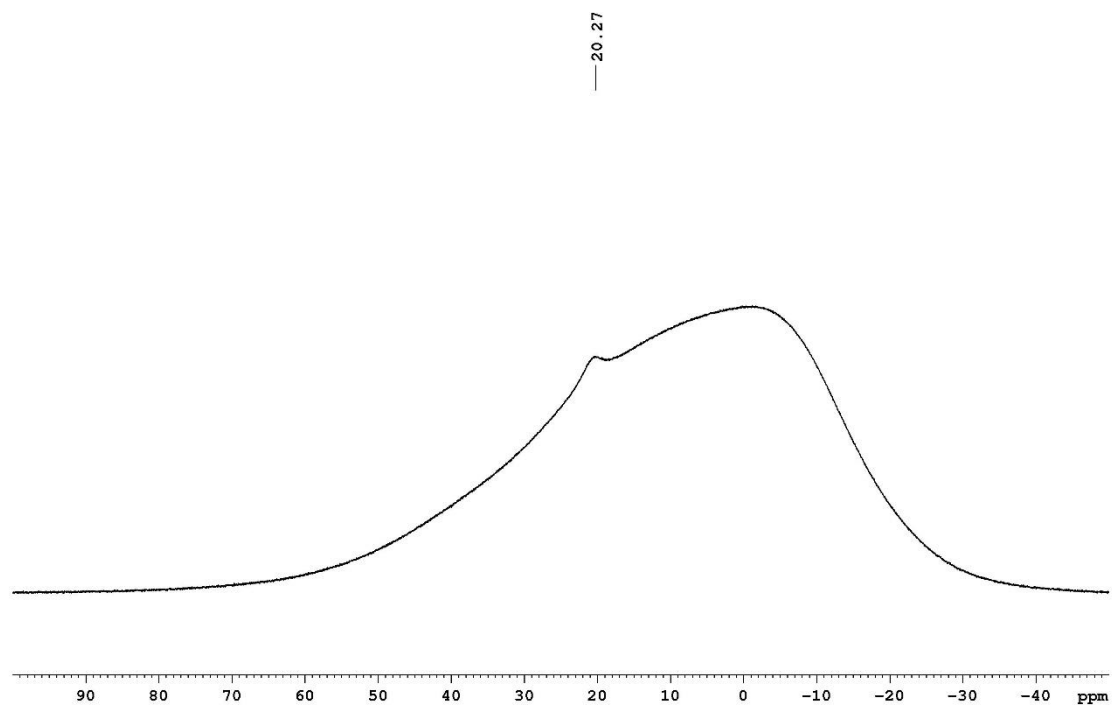

**Figure S25.**  $^{11}\text{B}$  NMR (160.5 MHz,  $\text{C}_6\text{D}_6$ , 298 K) spectrum of **1f**.

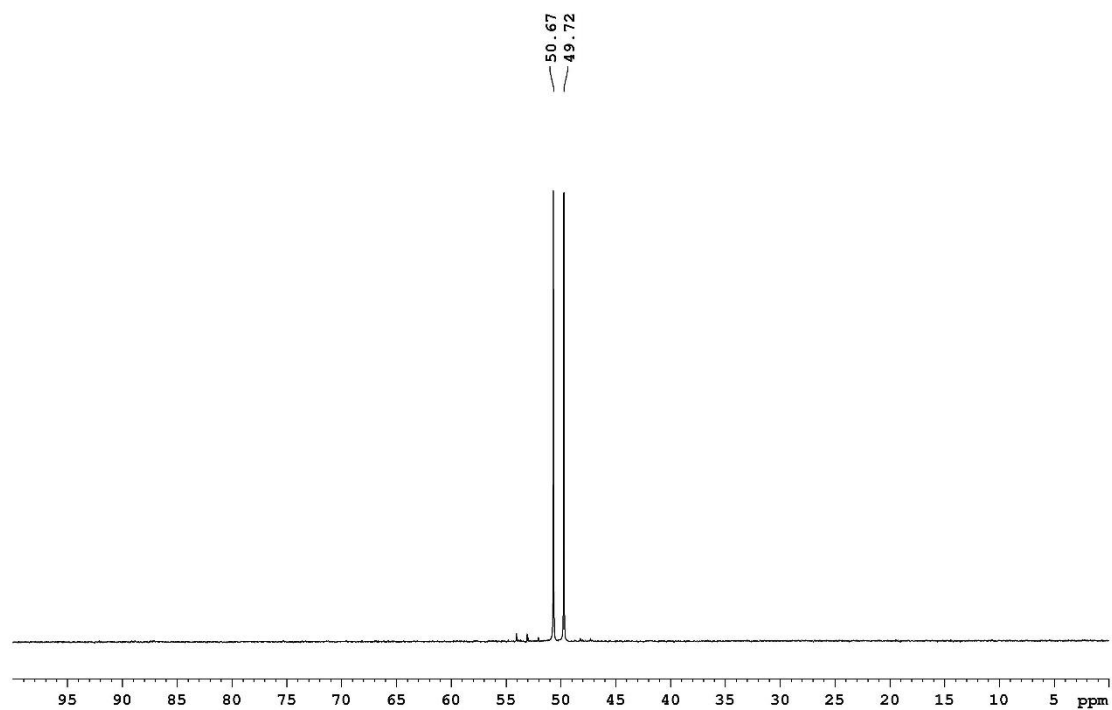

**Figure S26.**  $^{31}\text{P}\{^1\text{H}\}$  NMR (202.5 MHz,  $\text{C}_6\text{D}_6$ , 298 K) spectrum of **1f**.

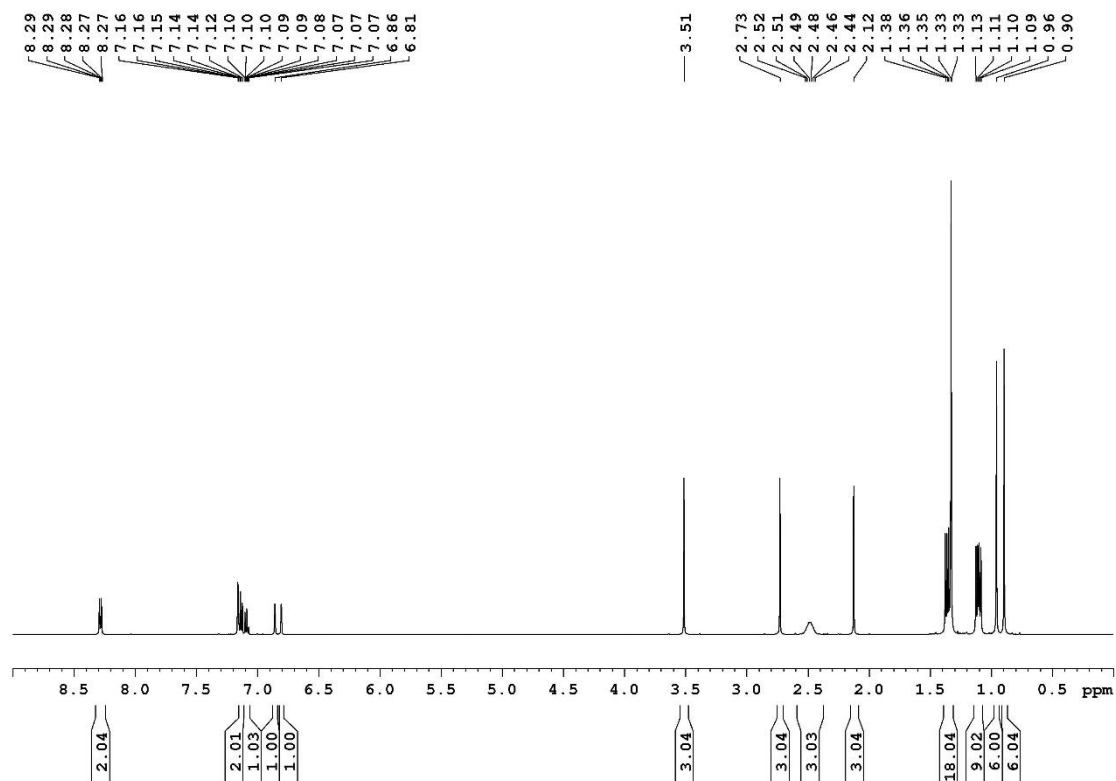

Figure S27.  $^1\text{H}$  NMR (500.1 MHz,  $\text{C}_6\text{D}_6$ , 298 K) spectrum of **1g**.

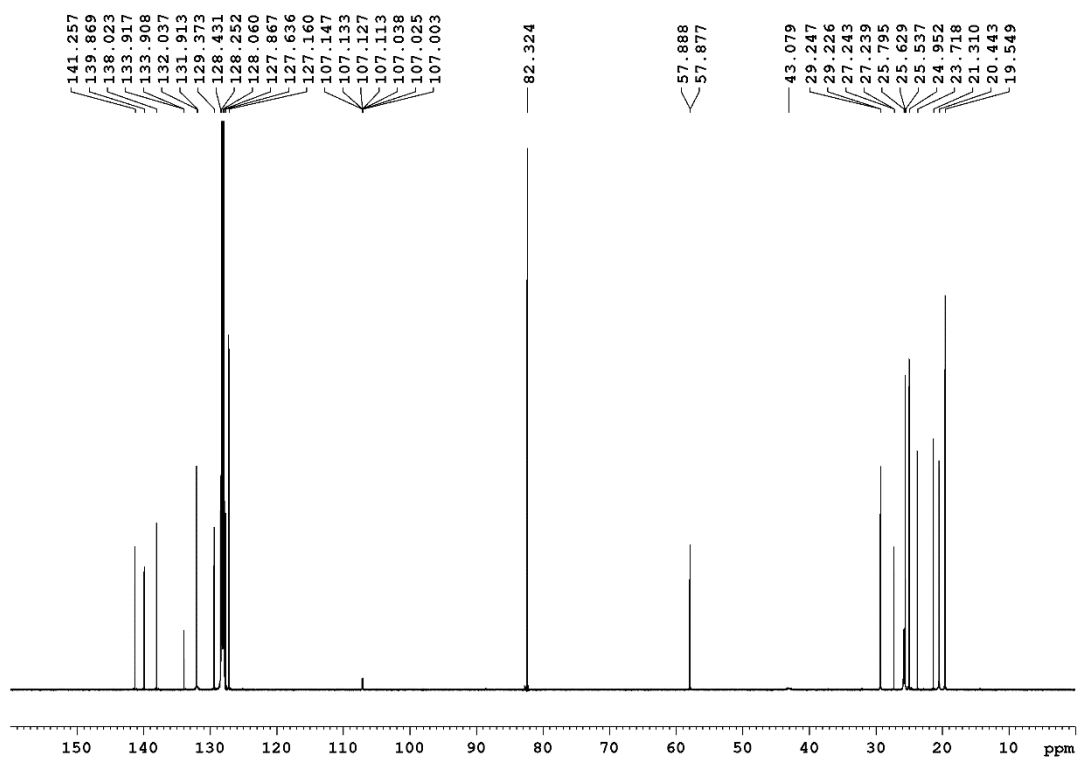

Figure S28.  $^{13}\text{C}\{^1\text{H}\}$  NMR (125.8 MHz,  $\text{C}_6\text{D}_6$ , 298 K) spectrum of **1g**.

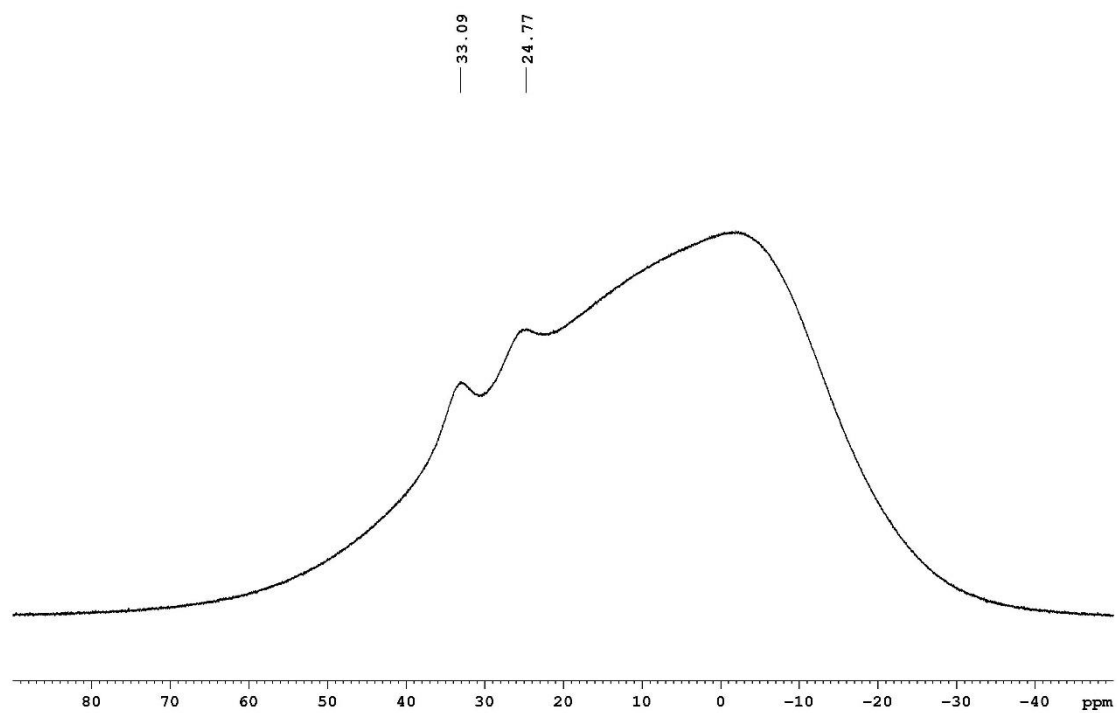

**Figure S29.**  $^{11}\text{B}$  NMR (160.5 MHz,  $\text{C}_6\text{D}_6$ , 298 K) spectrum of **1g**.

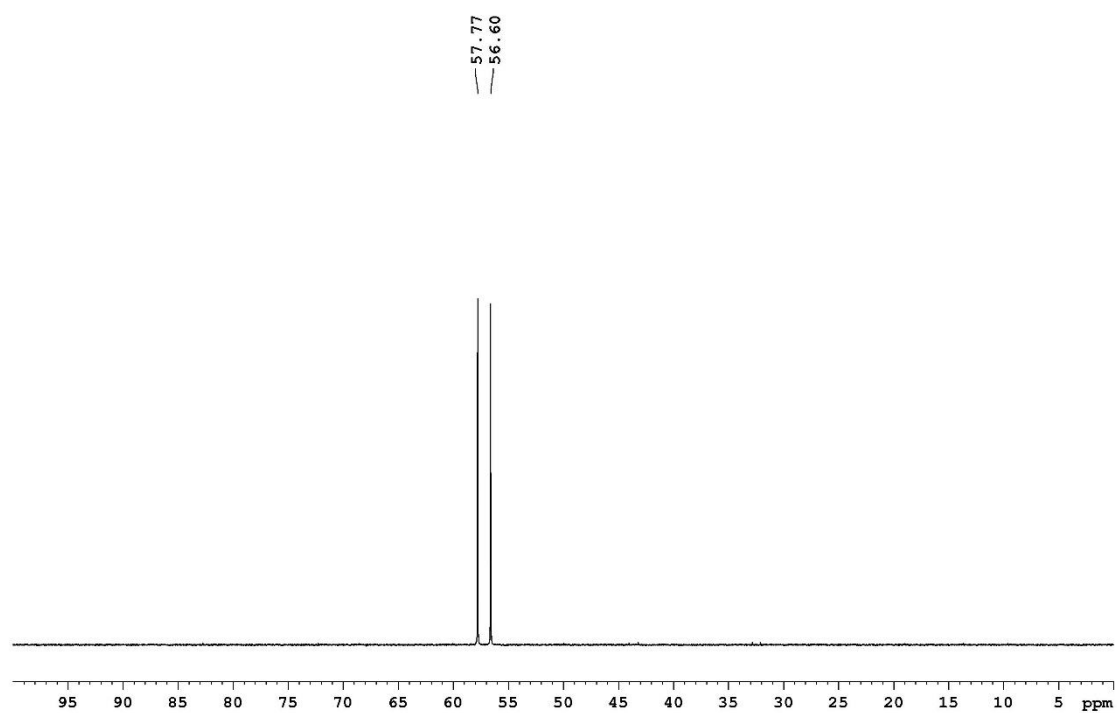

**Figure S30.**  $^{31}\text{P}\{^1\text{H}\}$  NMR (162.2 MHz,  $\text{C}_6\text{D}_6$ , 298 K) spectrum of **1g**.



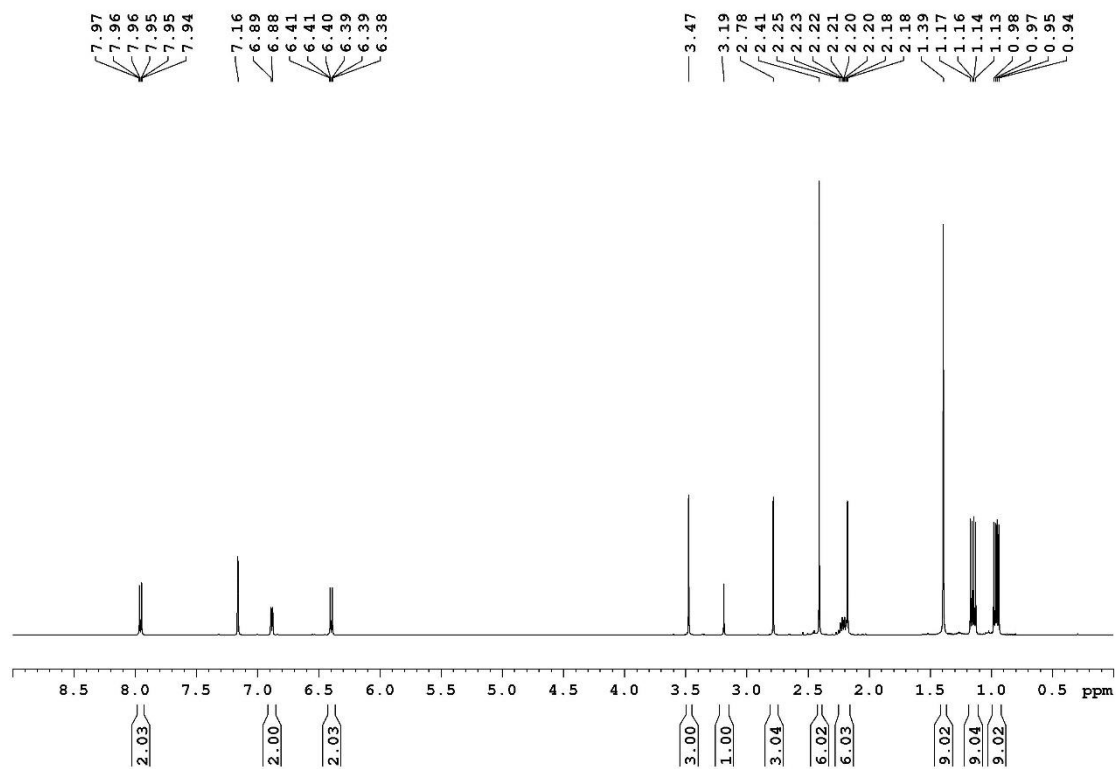

Figure S31.  $^1\text{H}$  NMR (500.1 MHz,  $\text{C}_6\text{D}_6$ , 298 K) spectrum of **1h**.

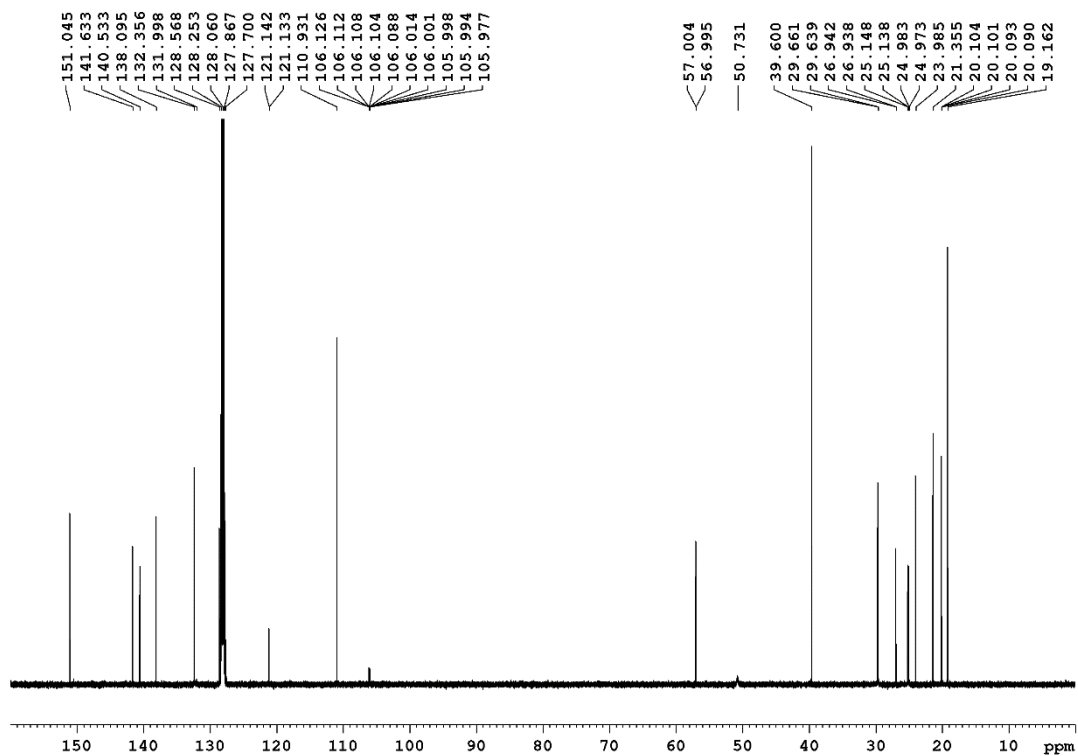

Figure S32.  $^{13}\text{C}\{^1\text{H}\}$  NMR (125.8 MHz,  $\text{C}_6\text{D}_6$ , 298 K) spectrum of **1h**.

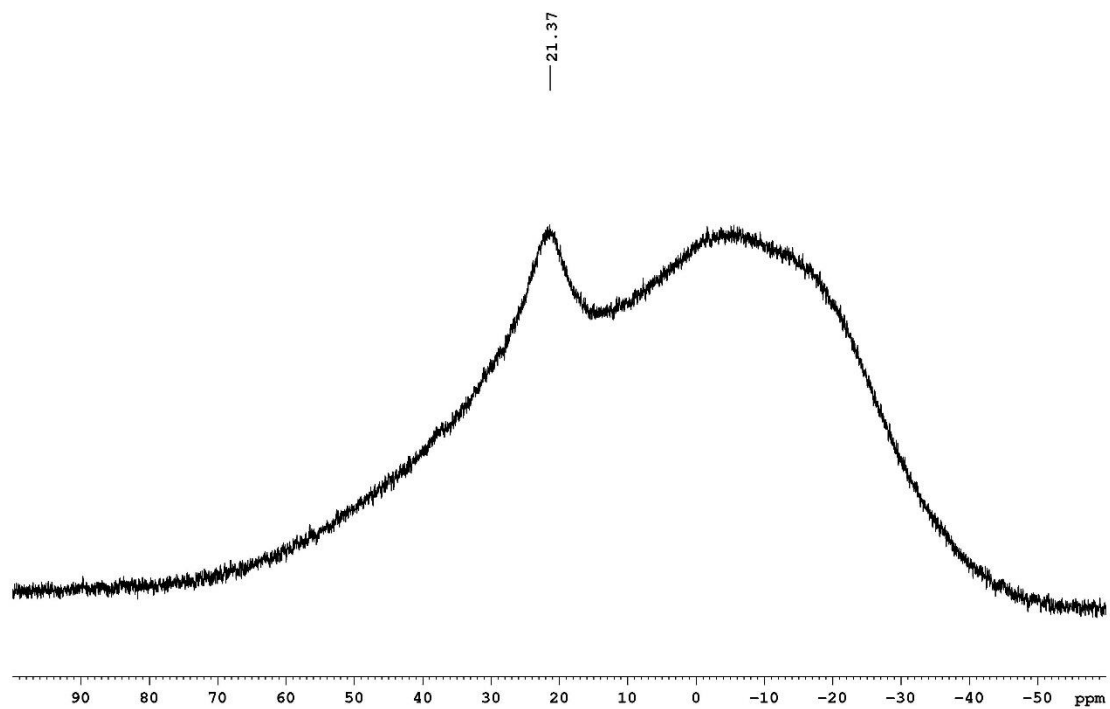

**Figure S33.**  $^{11}\text{B}$  NMR (128.5 MHz,  $\text{C}_6\text{D}_6$ , 298 K) spectrum of **1h**.

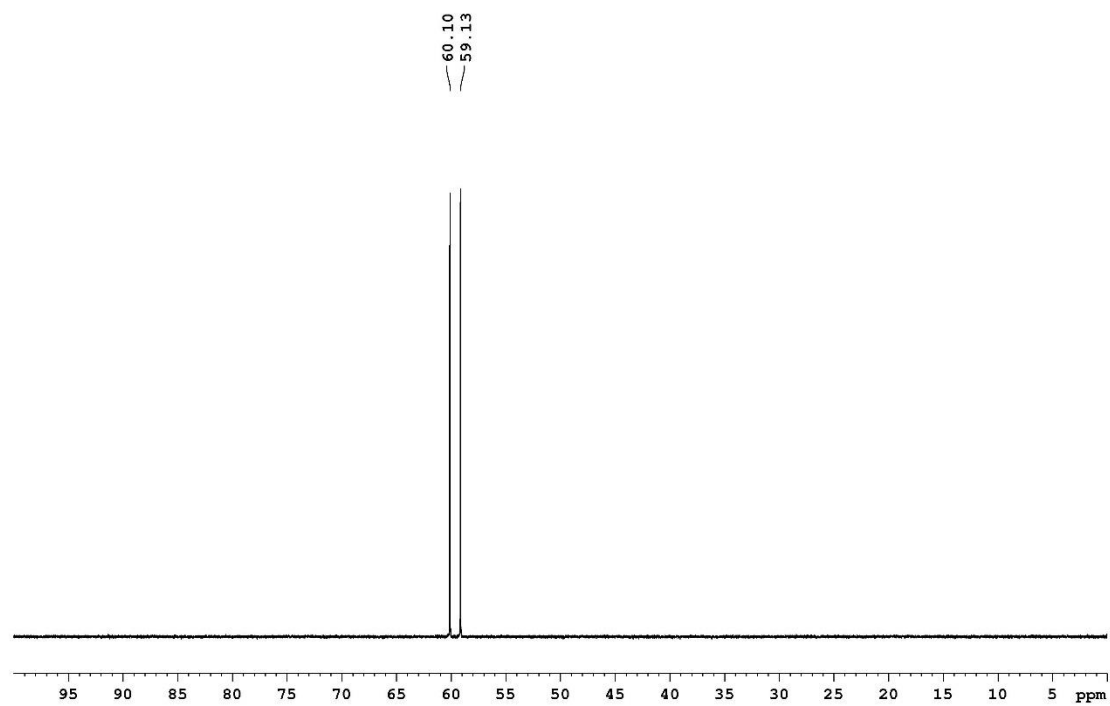

**Figure S34**  $^{31}\text{P}\{^1\text{H}\}$  NMR (202.5 MHz,  $\text{C}_6\text{D}_6$ , 298 K) spectrum of **1h**.

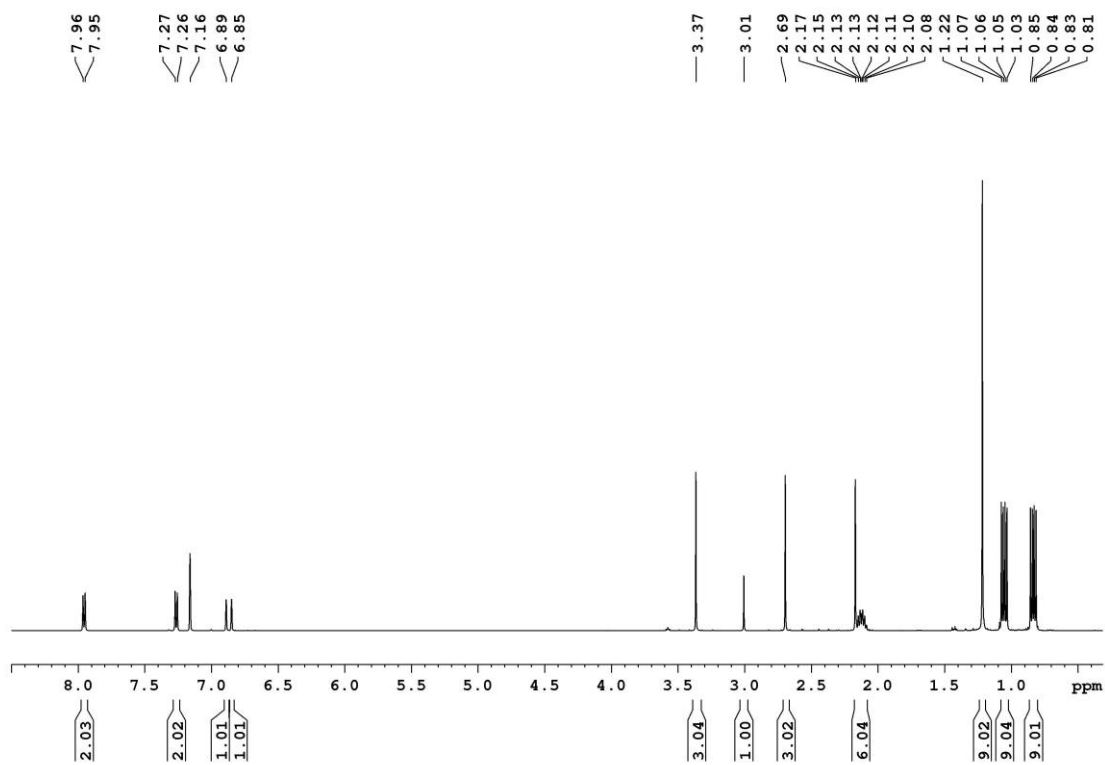

Figure S35.  $^1\text{H}$  NMR (500.1 MHz,  $\text{C}_6\text{D}_6$ , 298 K) spectrum of **1i**.

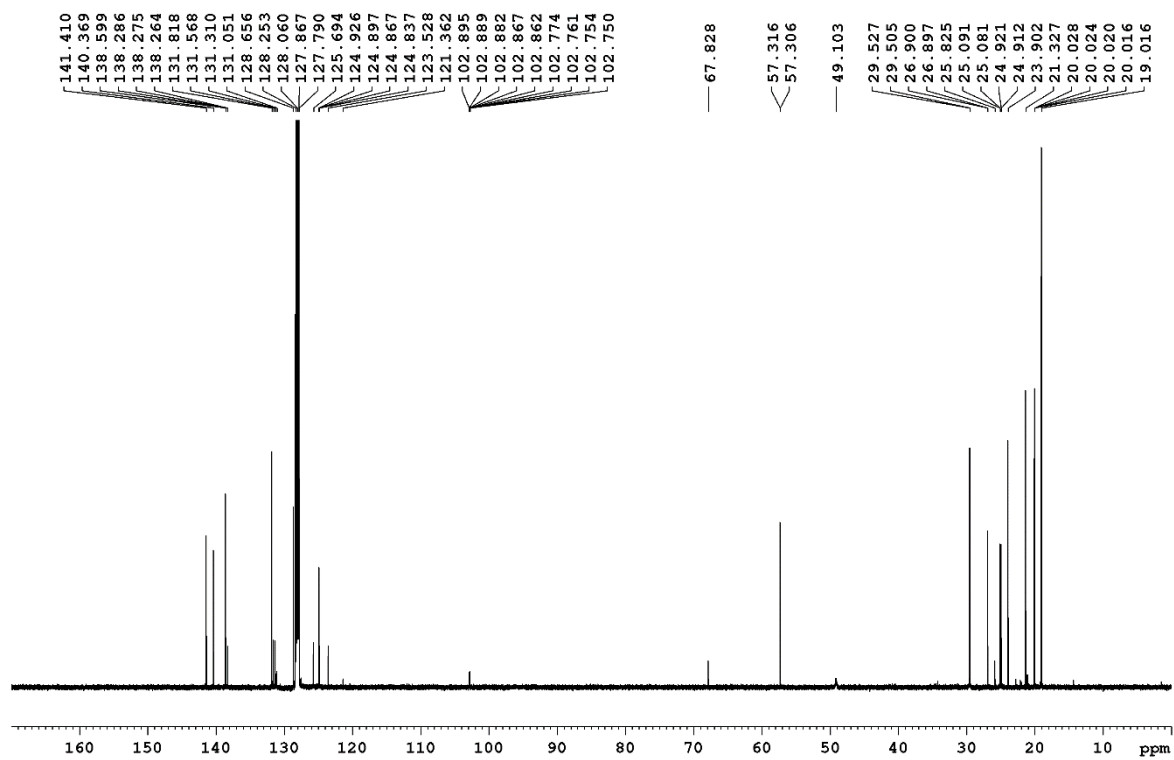

Figure S36.  $^{13}\text{C}\{^1\text{H}\}$  NMR (125.8 MHz,  $\text{C}_6\text{D}_6$ , 298 K) spectrum of **1i**.

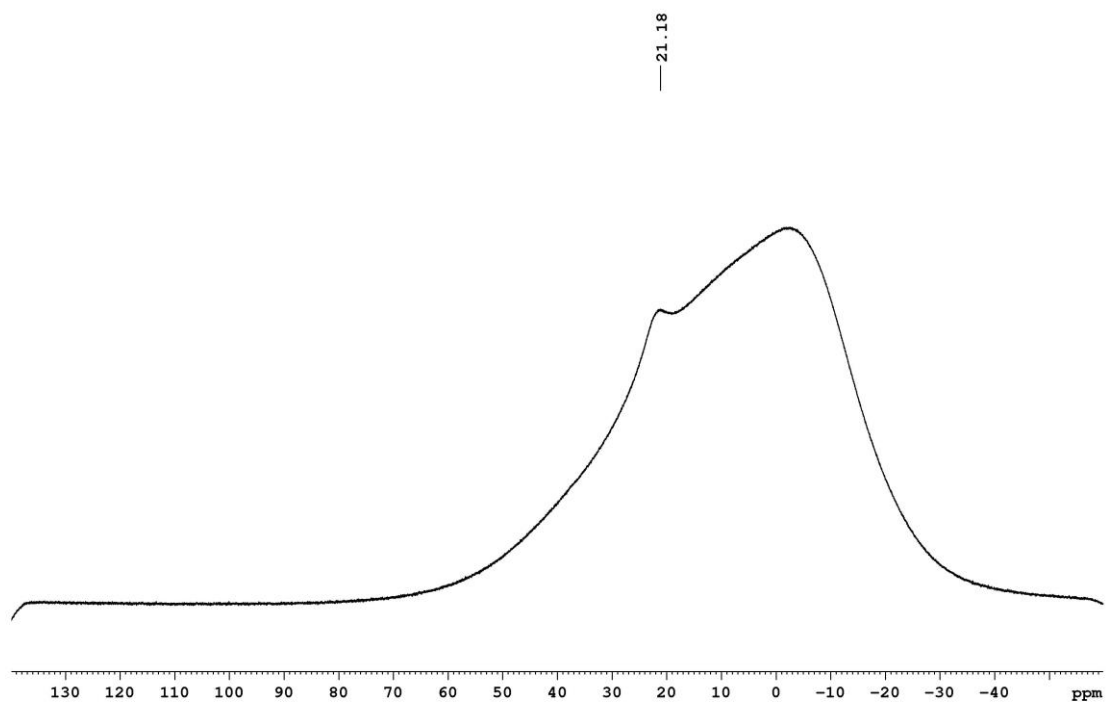

**Figure S37.**  $^{11}\text{B}$  NMR (160.5 MHz,  $\text{C}_6\text{D}_6$ , 298 K) spectrum of **1i**.

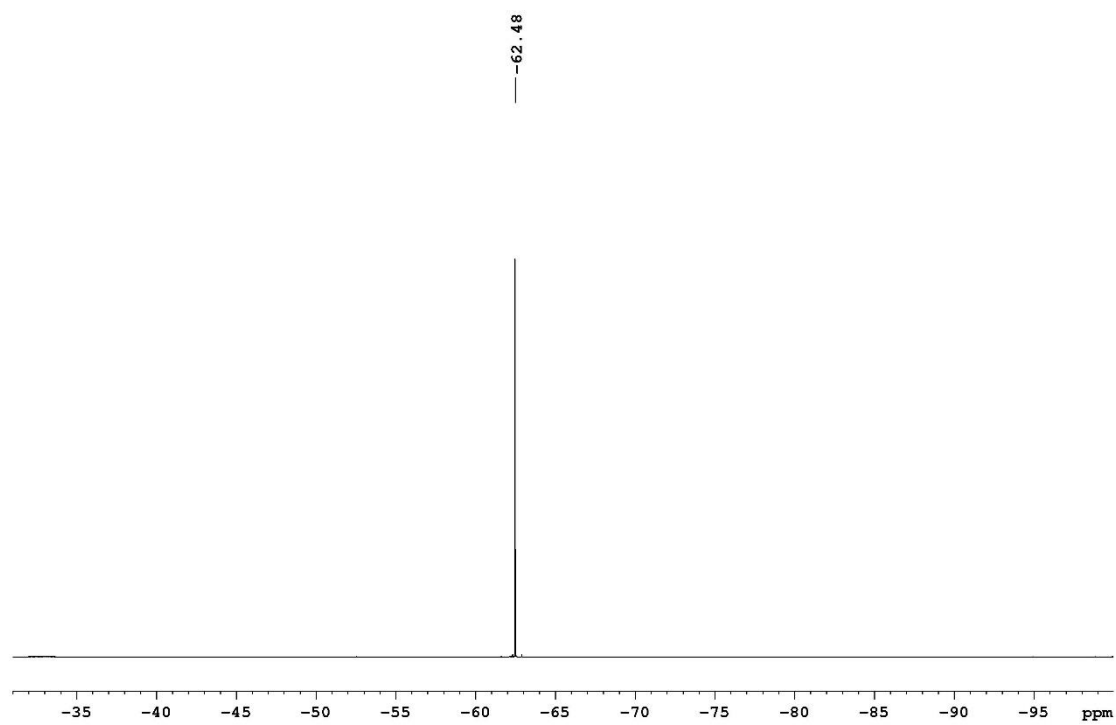

**Figure S38.**  $^{19}\text{F}$  NMR (470.6 MHz,  $\text{C}_6\text{D}_6$ , 298 K) spectrum of **1i**.

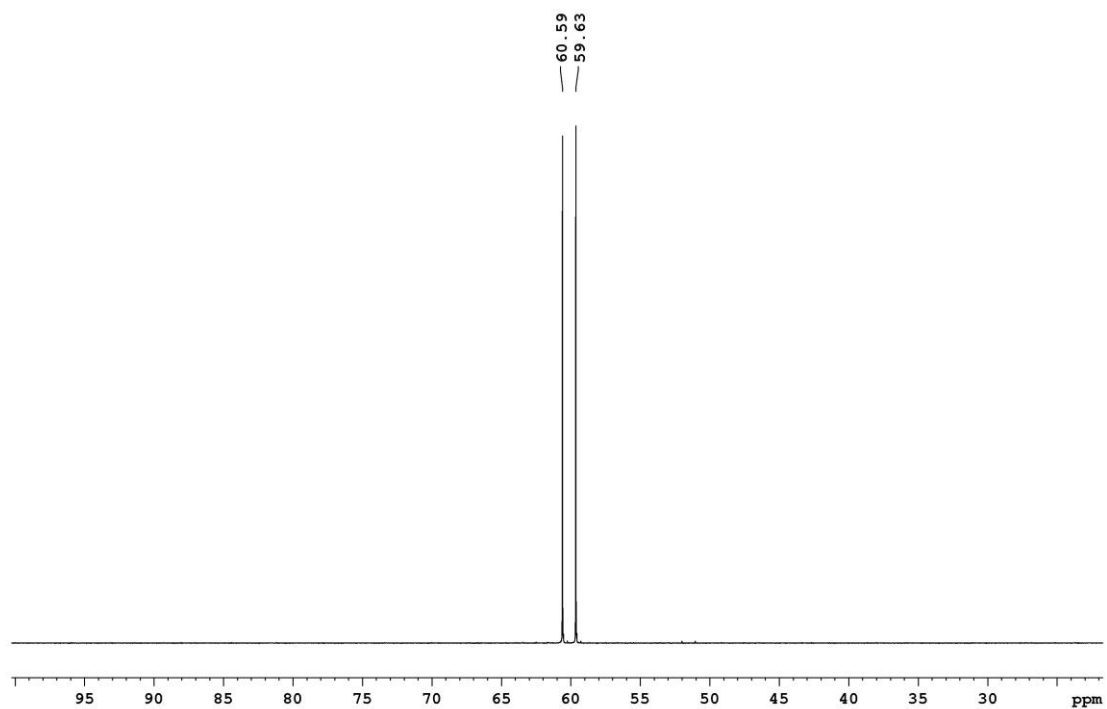

**Figure S39.**  $^{31}\text{P}\{^1\text{H}\}$  NMR (202.5 MHz,  $\text{C}_6\text{D}_6$ , 298 K) spectrum of **1i**.

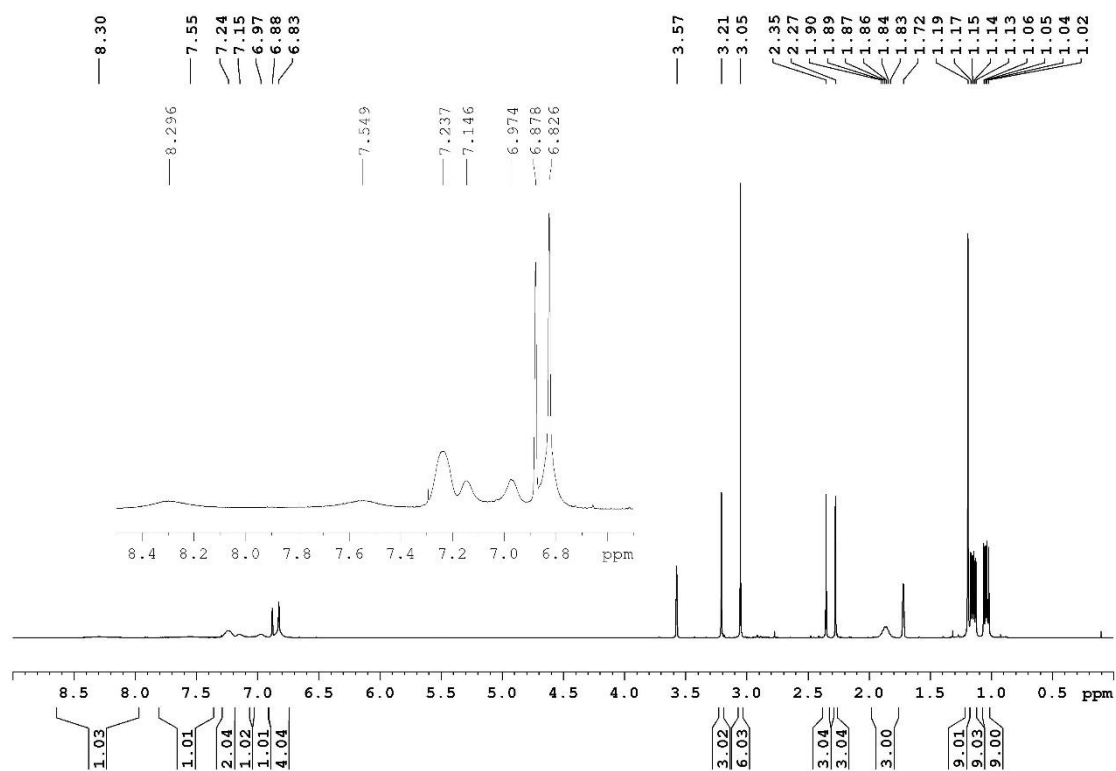

**Figure S40.**  $^1\text{H}$  NMR (500.1 MHz,  $\text{d}_8\text{-THF}$ , 298 K) spectrum of **1j**.

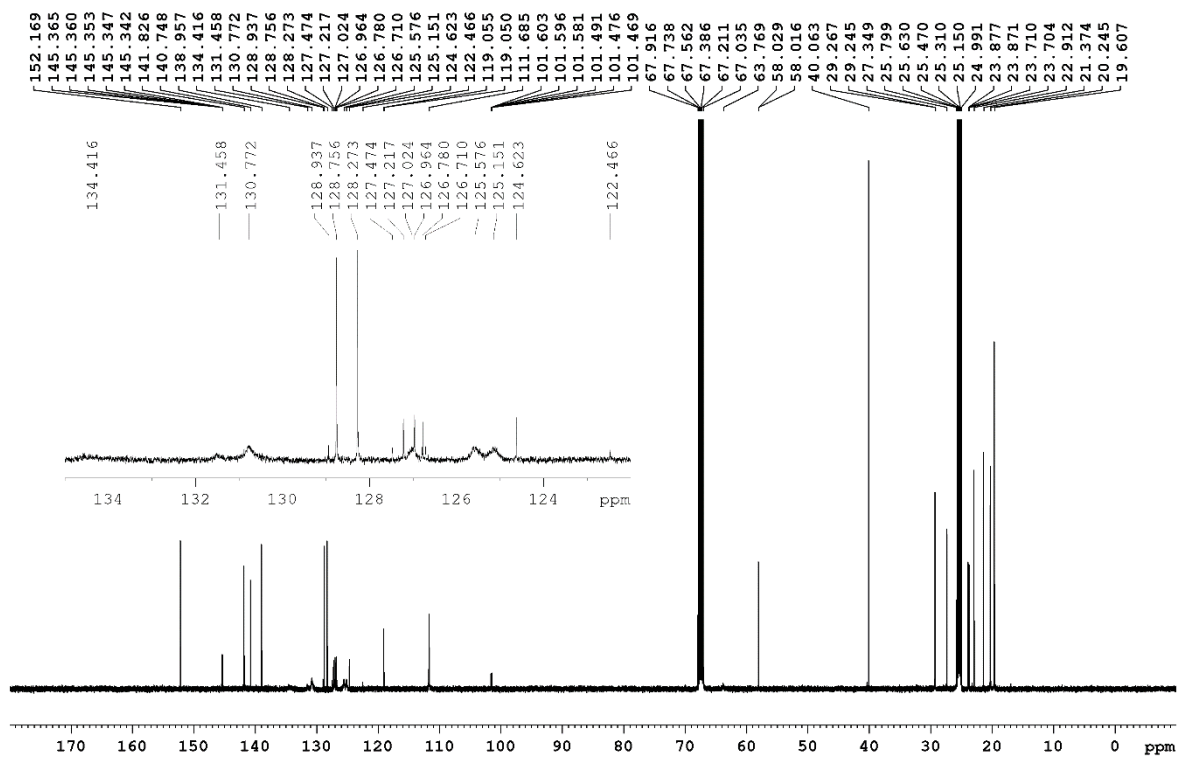

Figure S41.  $^{13}\text{C}\{^1\text{H}\}$  NMR (125.8 MHz,  $d_8$ -THF, 298 K) spectrum of **1j**.

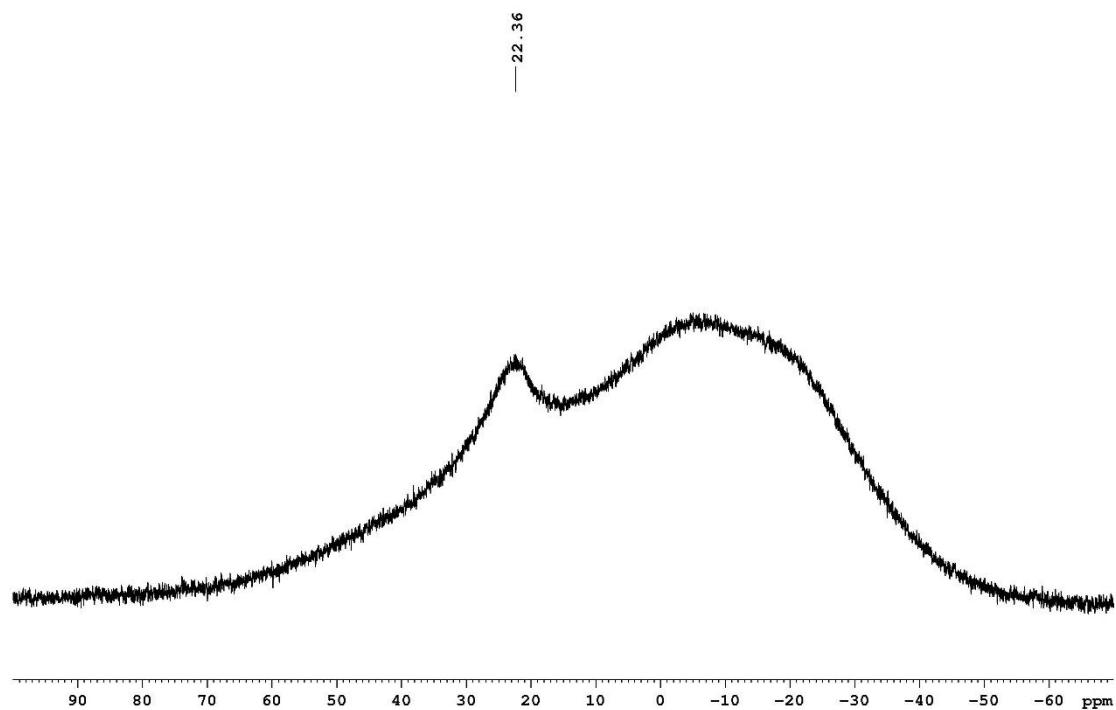

Figure S42.  $^{11}\text{B}$  NMR (128.5 MHz,  $d_8$ -THF, 298 K) spectrum of **1j**.

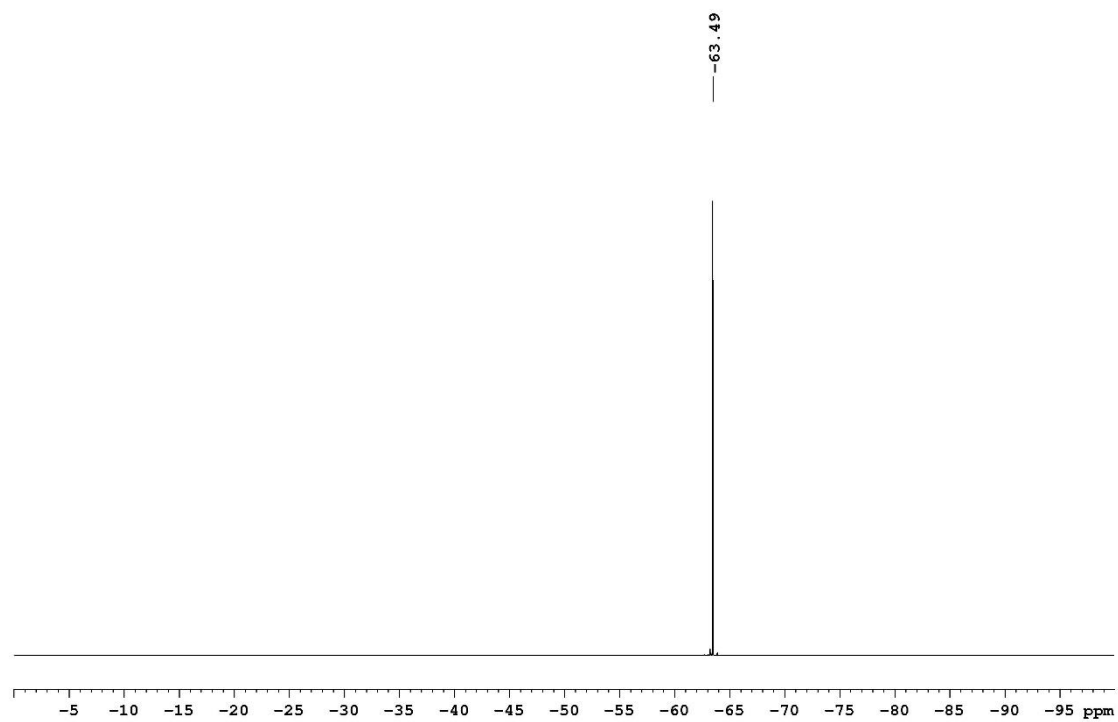

**Figure S43.**  $^{19}\text{F}$  NMR (470.6 MHz,  $d_8$ -THF, 298 K) spectrum of **1j**.

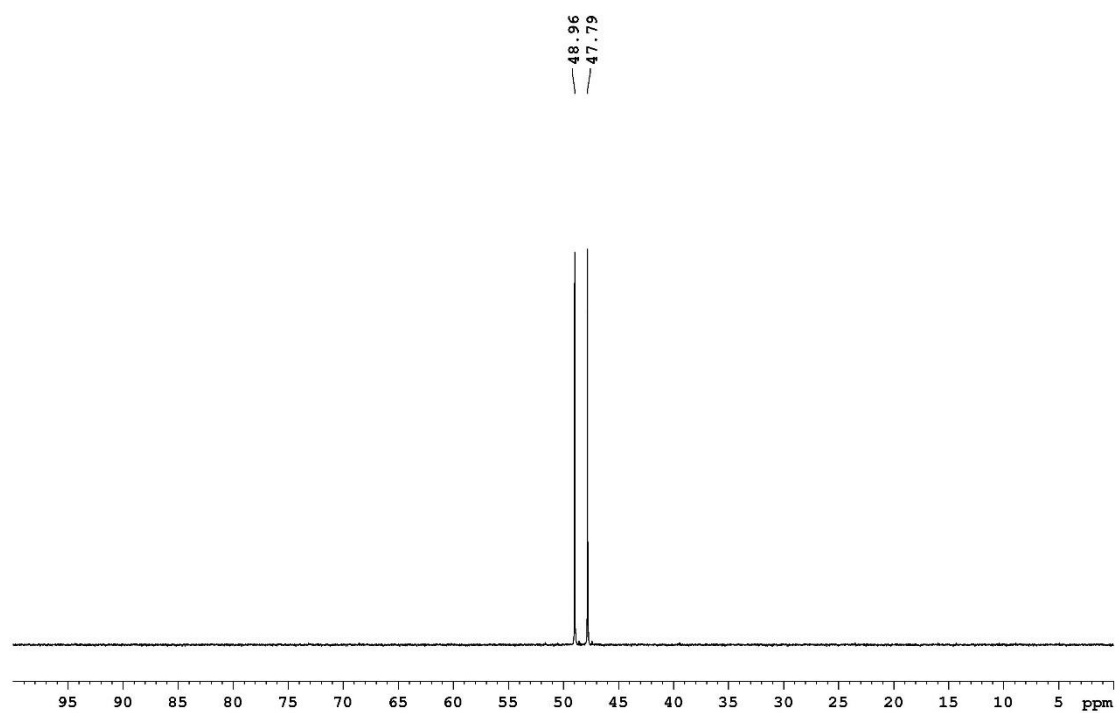

**Figure S44.**  $^{31}\text{P}\{^1\text{H}\}$  NMR (162.0 MHz,  $d_8$ -THF, 298 K) spectrum of **1j**.

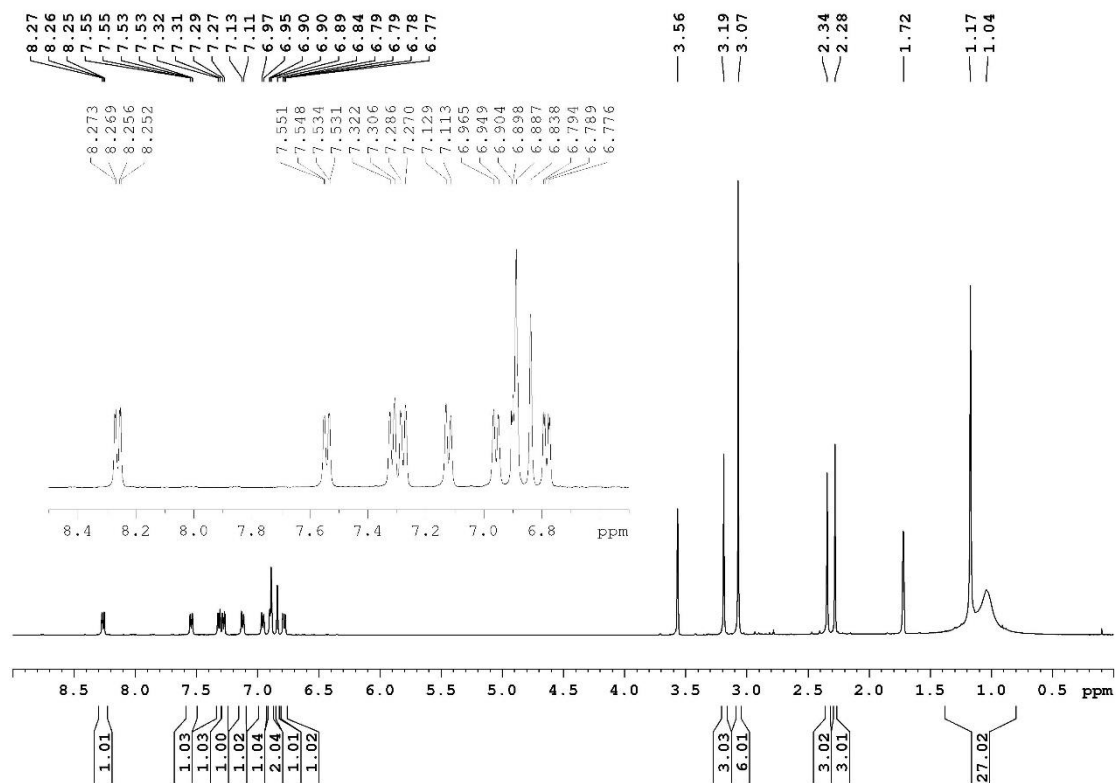

Figure S45.  $^1\text{H}$  NMR (500.1 MHz,  $d_8$ -THF, 233 K) spectrum of **1j**.

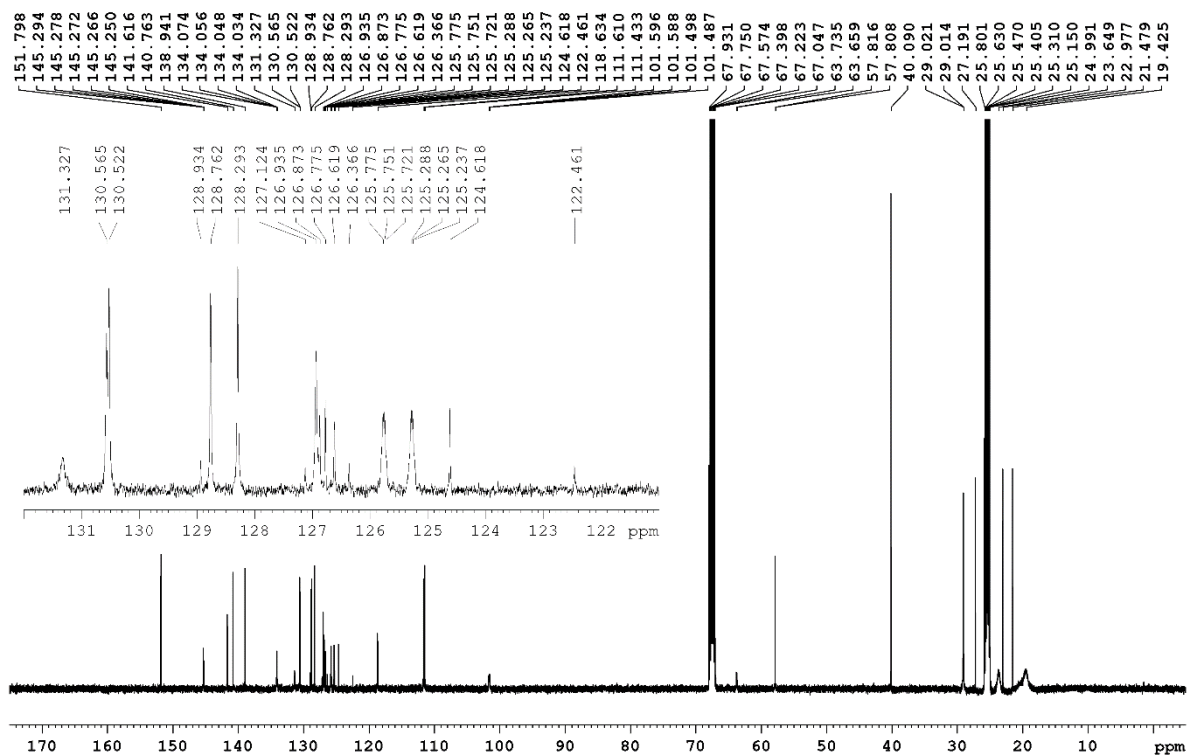

Figure S46.  $^{13}\text{C}\{^1\text{H}\}$  NMR (125.8 MHz,  $d_8$ -THF, 233 K) spectrum of **1j**.



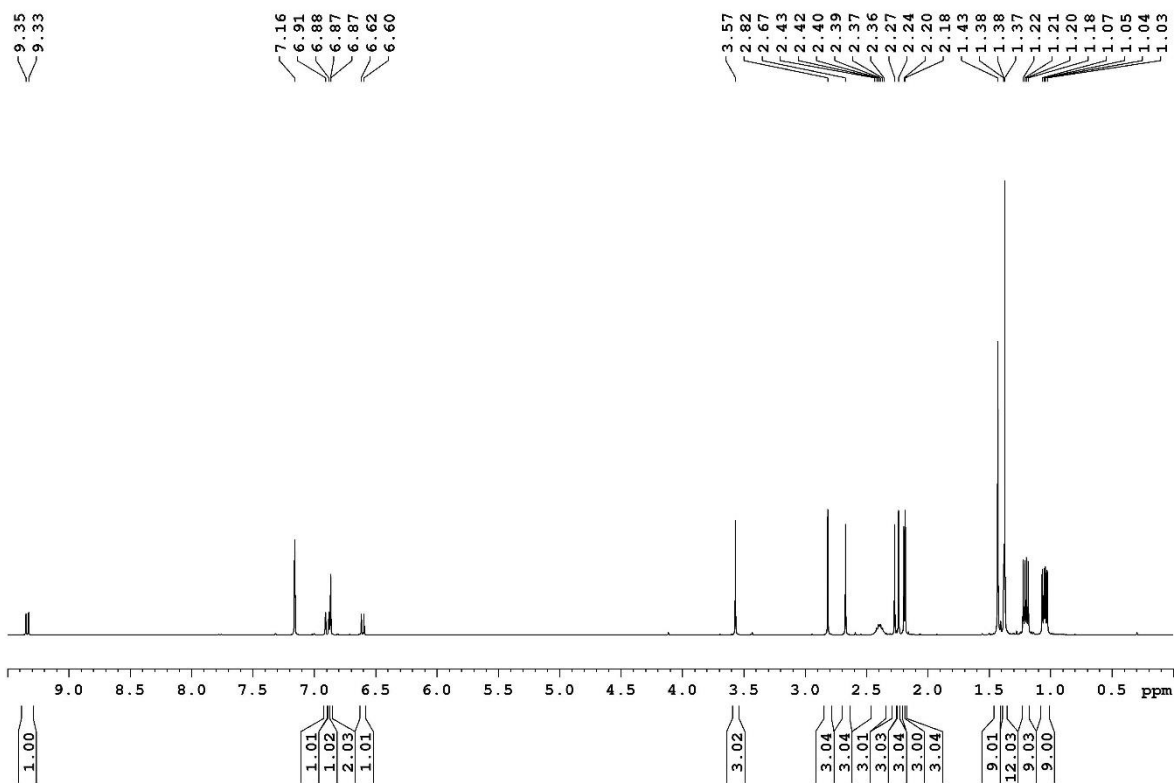

Figure S47.  $^1\text{H}$  NMR (500.1 MHz,  $\text{C}_6\text{D}_6$ , 298 K) spectrum of **1k**.

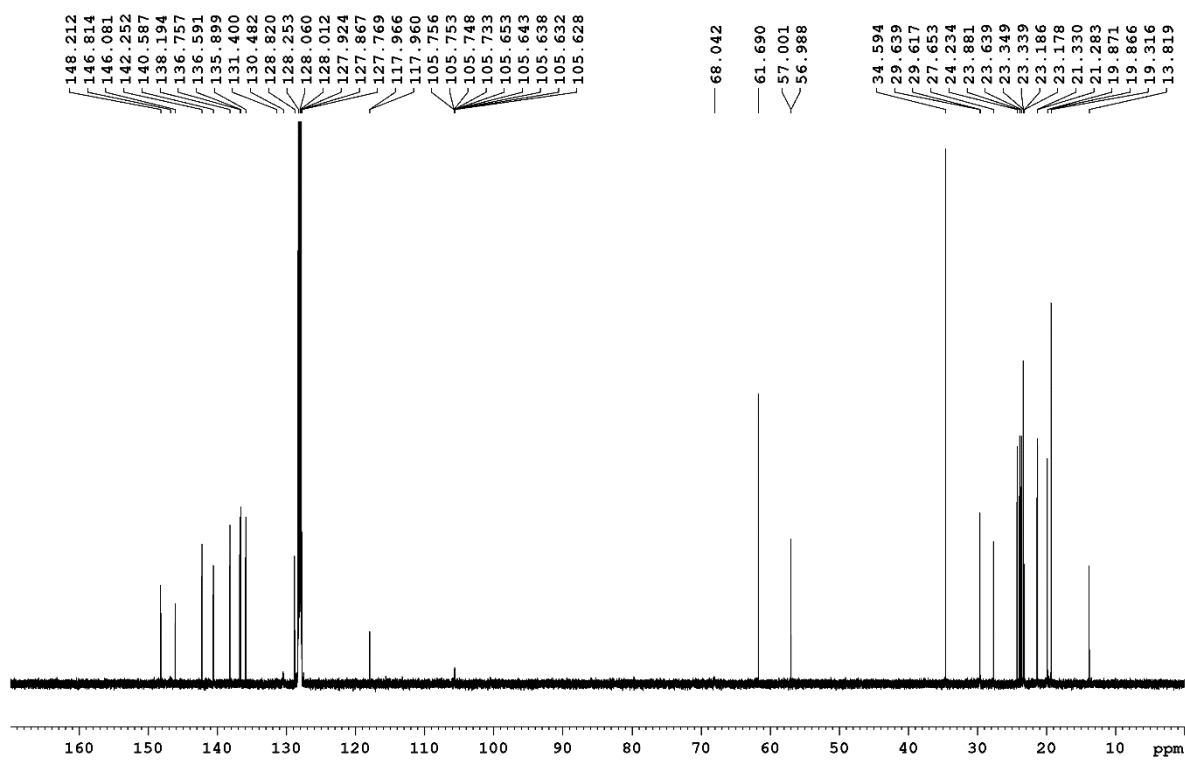

Figure S48.  $^{13}\text{C}\{^1\text{H}\}$  NMR (125.8 MHz,  $\text{C}_6\text{D}_6$ , 298 K) spectrum of **1k**.

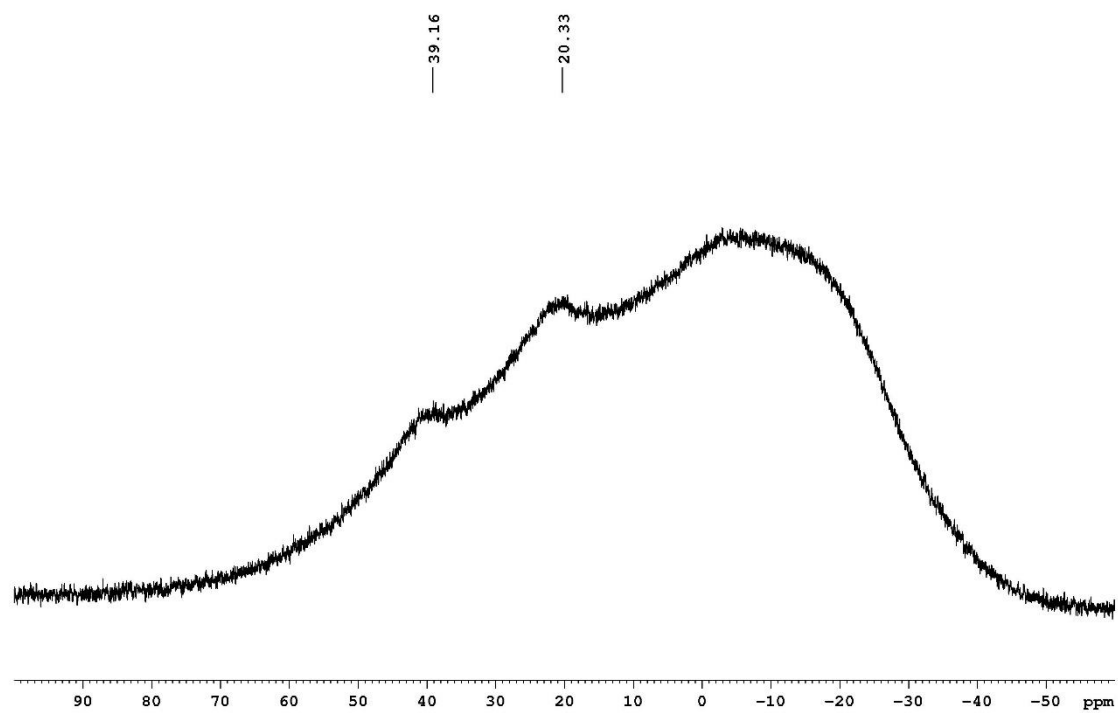

**Figure S49.**  $^{11}\text{B}$  NMR (128.5 MHz,  $\text{C}_6\text{D}_6$ , 298 K) spectrum of **1k**.

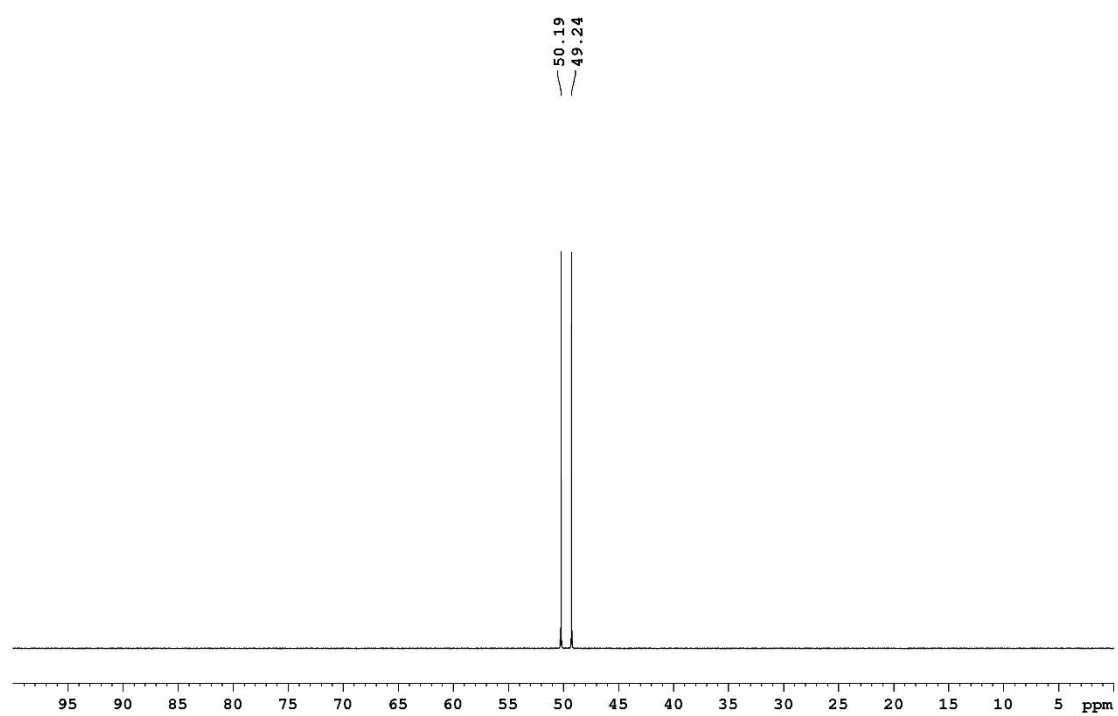

**Figure S50.**  $^{31}\text{P}\{^1\text{H}\}$  NMR (202.5 MHz,  $\text{C}_6\text{D}_6$ , 298 K) spectrum of **1k**.

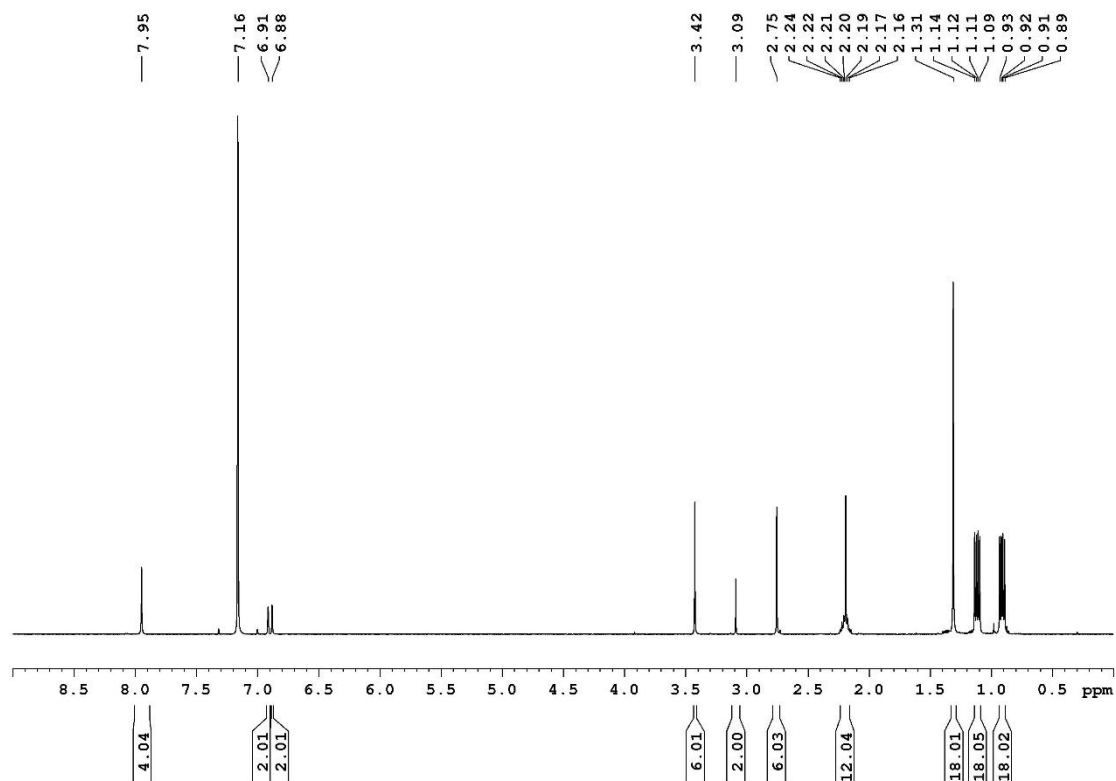

Figure S51.  $^1\text{H}$  NMR (500.1 MHz,  $\text{C}_6\text{D}_6$ , 298 K) spectrum of **11**.

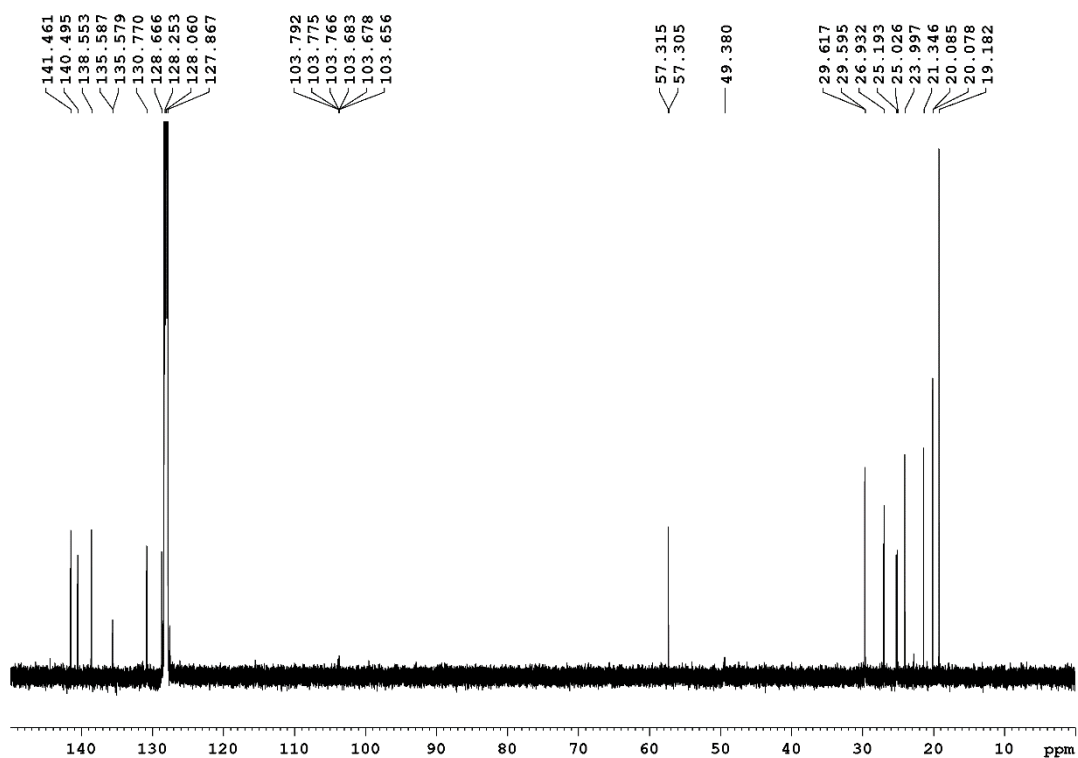

Figure S52.  $^{13}\text{C}\{^1\text{H}\}$  NMR (125.8 MHz,  $\text{C}_6\text{D}_6$ , 298 K) spectrum of **11**.

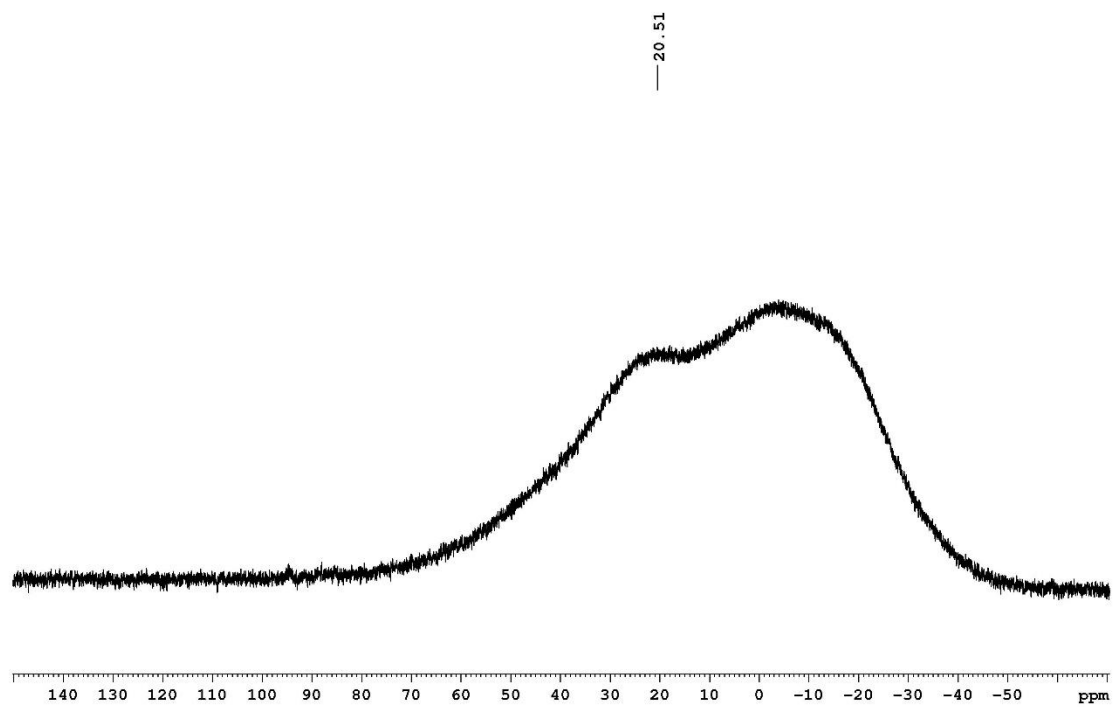

**Figure S53.**  $^{11}\text{B}$  NMR (128.4 MHz,  $\text{C}_6\text{D}_6$ , 298 K) spectrum of **11**.

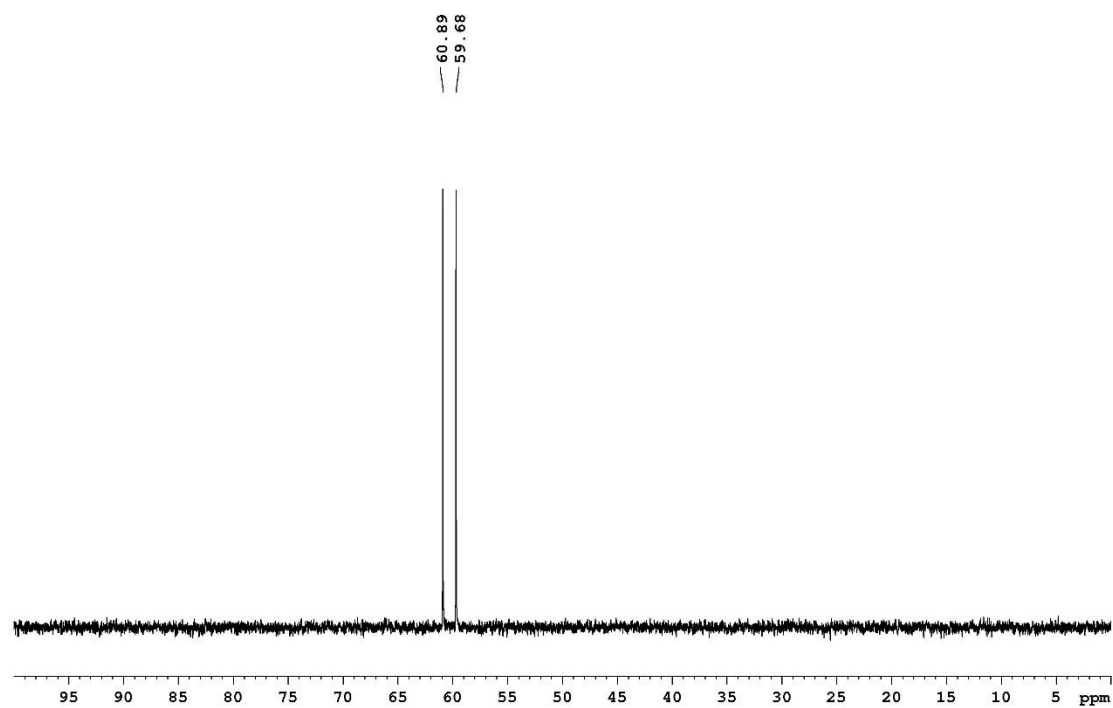

**Figure S54.**  $^{31}\text{P}\{^1\text{H}\}$  NMR (162.0 MHz,  $\text{C}_6\text{D}_6$ , 298 K) spectrum of **11**.

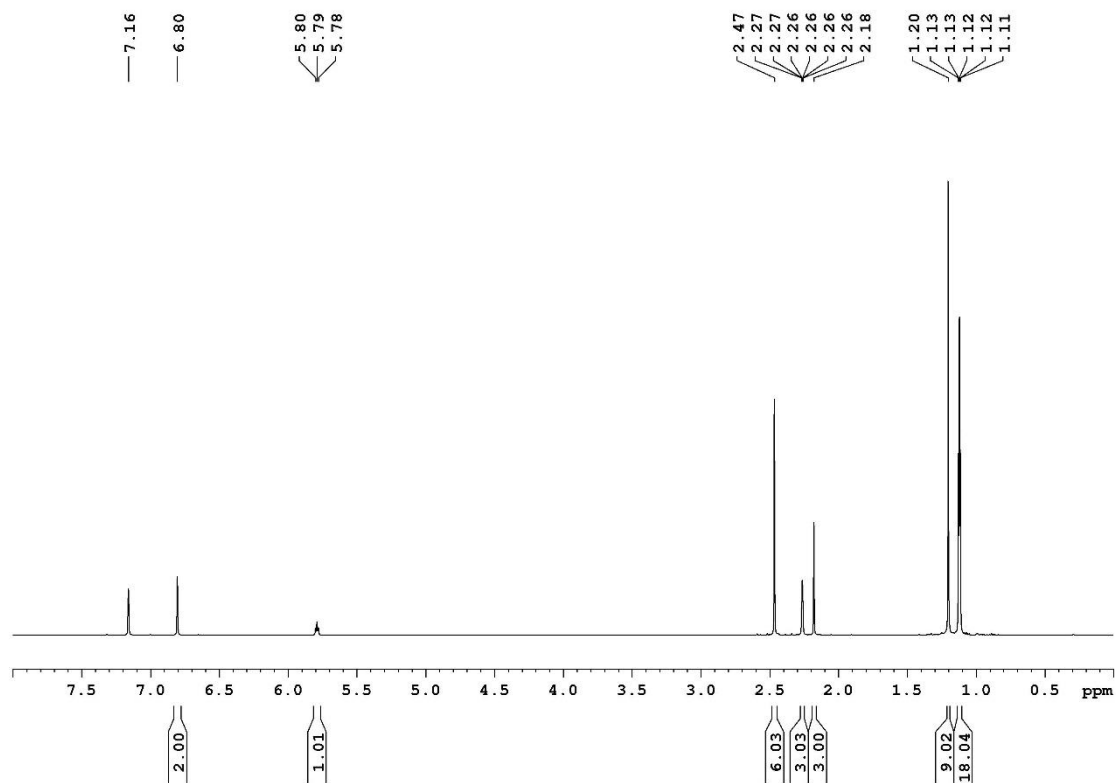

Figure S55.  $^1\text{H}$  NMR (500.1 MHz,  $\text{C}_6\text{D}_6$ , 298 K) spectrum of **2a**.

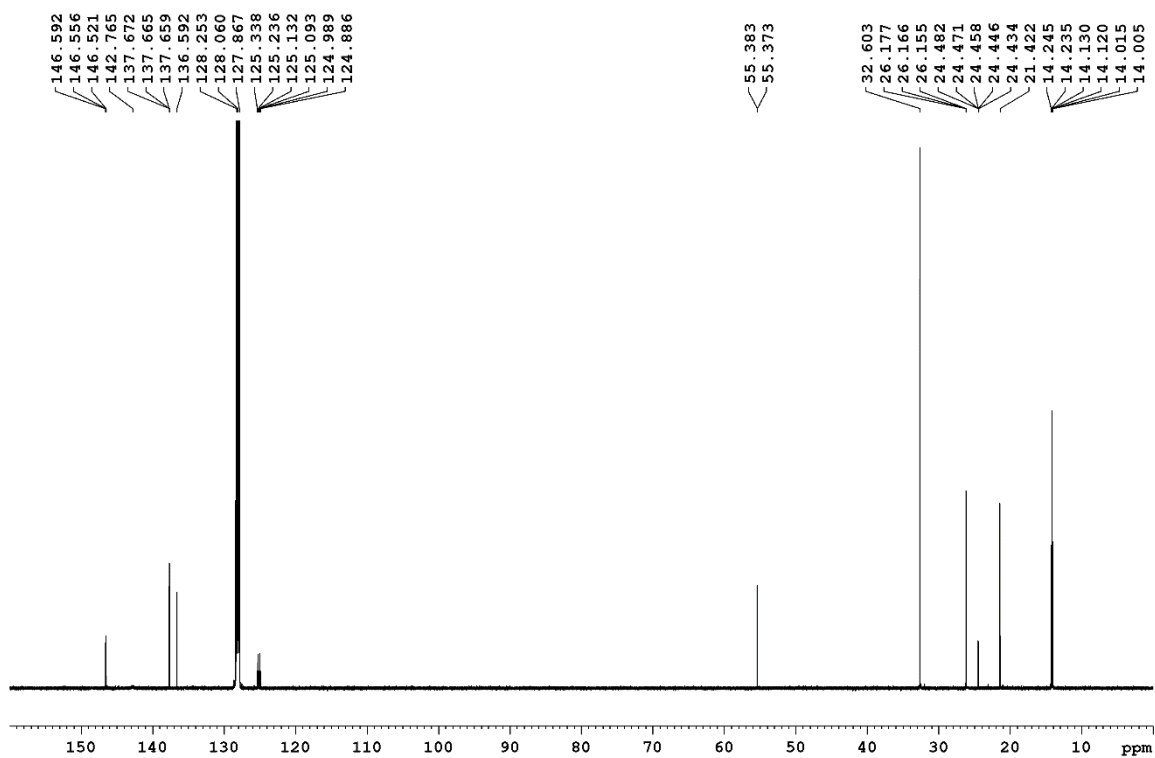

Figure S56.  $^{13}\text{C}\{^1\text{H}\}$  NMR (125.8 MHz,  $\text{C}_6\text{D}_6$ , 298 K) spectrum of **2a**.

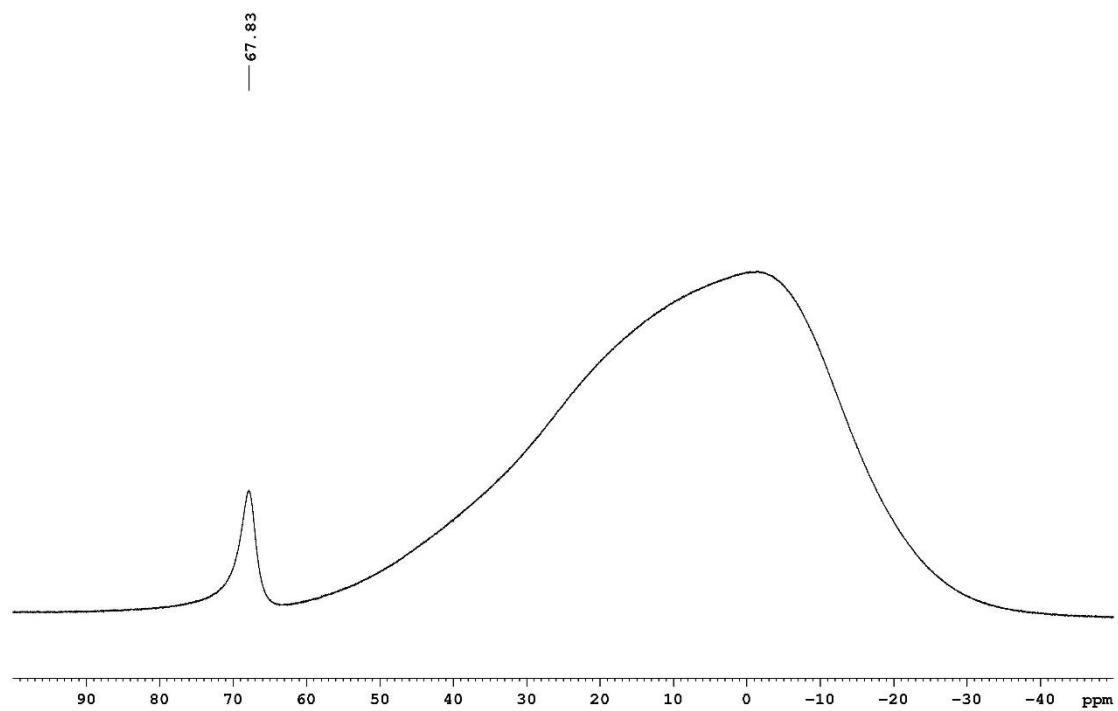

**Figure S57.**  $^{11}\text{B}$  NMR (160.5 MHz,  $\text{C}_6\text{D}_6$ , 298 K) spectrum of **2a**.

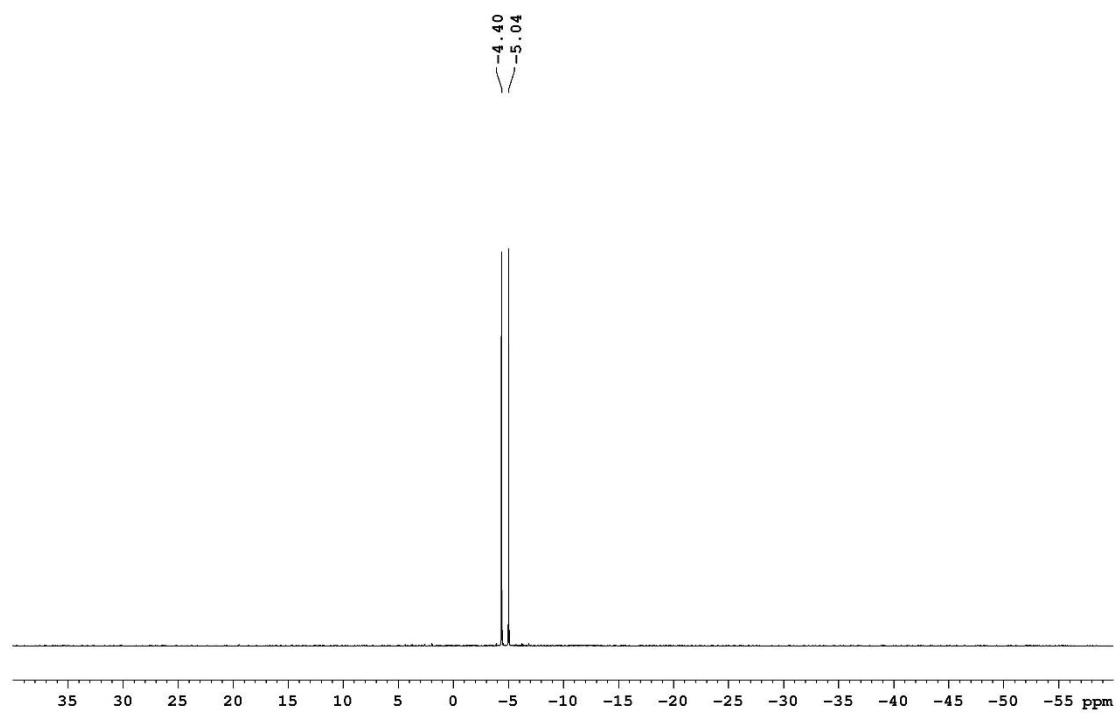

**Figure S58.**  $^{31}\text{P}\{^1\text{H}\}$  NMR (202.5 MHz,  $\text{C}_6\text{D}_6$ , 298 K) spectrum of **2a**.

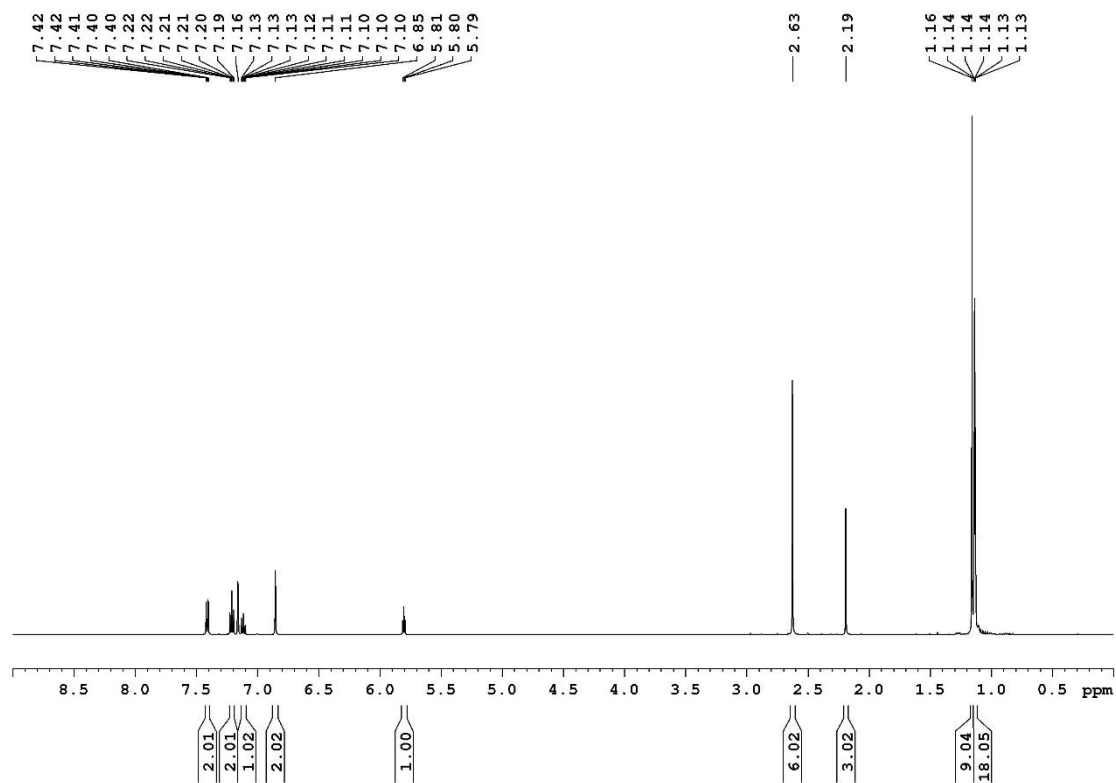

**Figure S59.**  $^1\text{H}$  NMR (500.1 MHz,  $\text{C}_6\text{D}_6$ , 298 K) spectrum of **2b**.

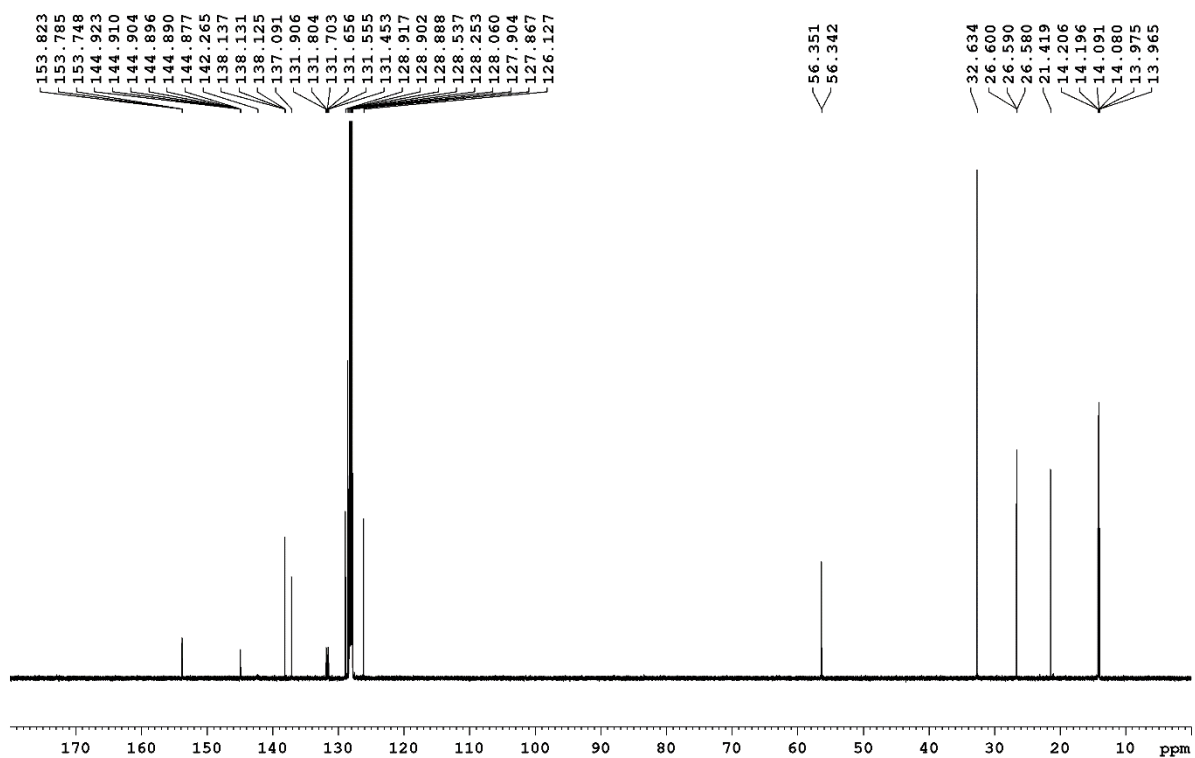

**Figure S60.**  $^{13}\text{C}\{^1\text{H}\}$  NMR (125.8 MHz,  $\text{C}_6\text{D}_6$ , 298 K) spectrum of **2b**.

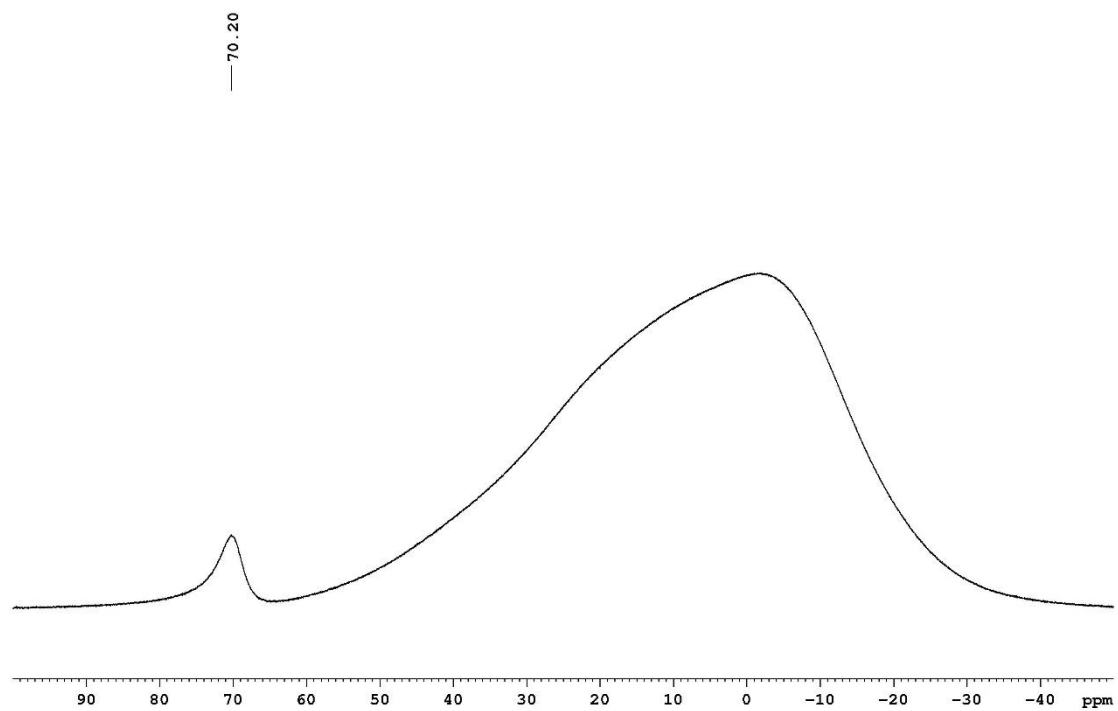

**Figure S61.**  $^{11}\text{B}$  NMR (160.5 MHz,  $\text{C}_6\text{D}_6$ , 298 K) spectrum of **2b**.

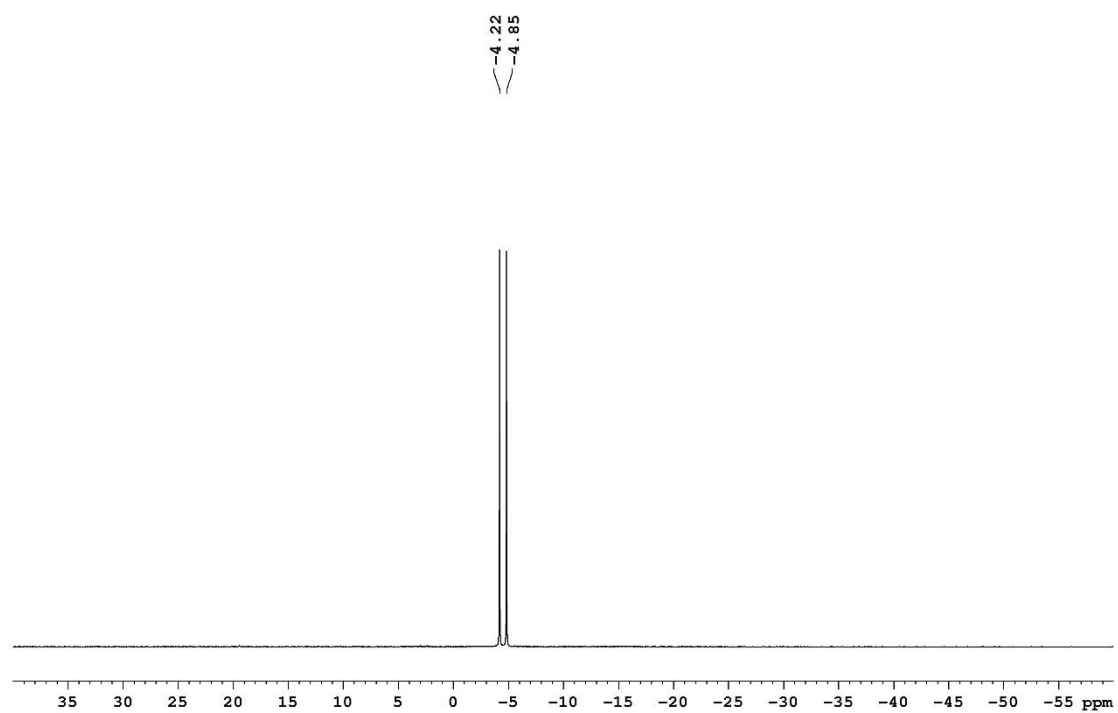

**Figure S62.**  $^{31}\text{P}\{^1\text{H}\}$  NMR (202.5 MHz,  $\text{C}_6\text{D}_6$ , 298 K) spectrum of **2b**.



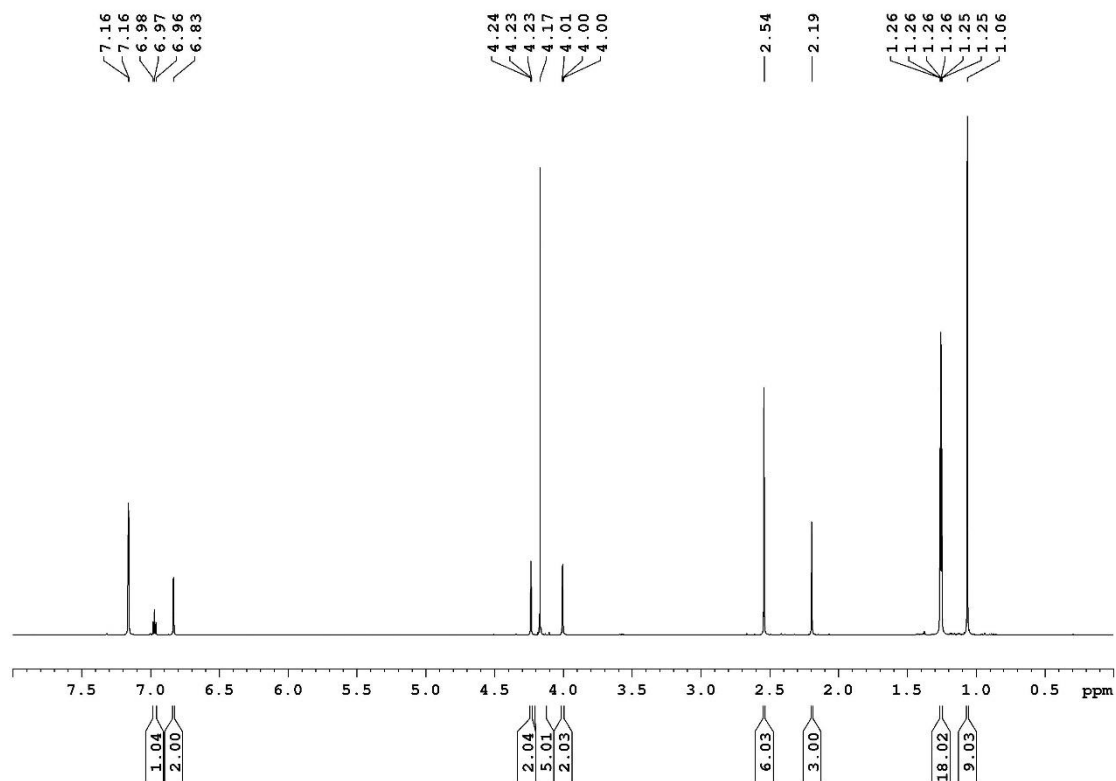

Figure S63.  $^1\text{H}$  NMR (500.1 MHz,  $\text{C}_6\text{D}_6$ , 298 K) spectrum of **2c**.

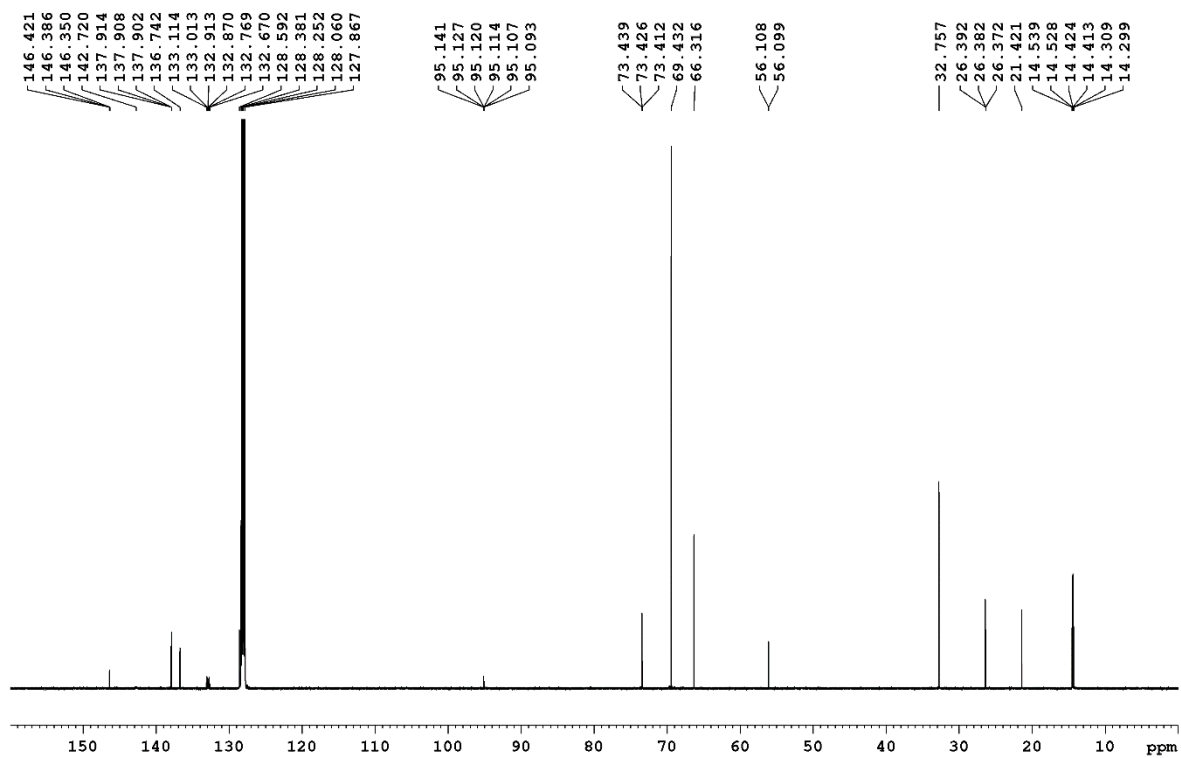

Figure S64.  $^{13}\text{C}\{^1\text{H}\}$  NMR (125.8 MHz,  $\text{C}_6\text{D}_6$ , 298 K) spectrum of **2c**.

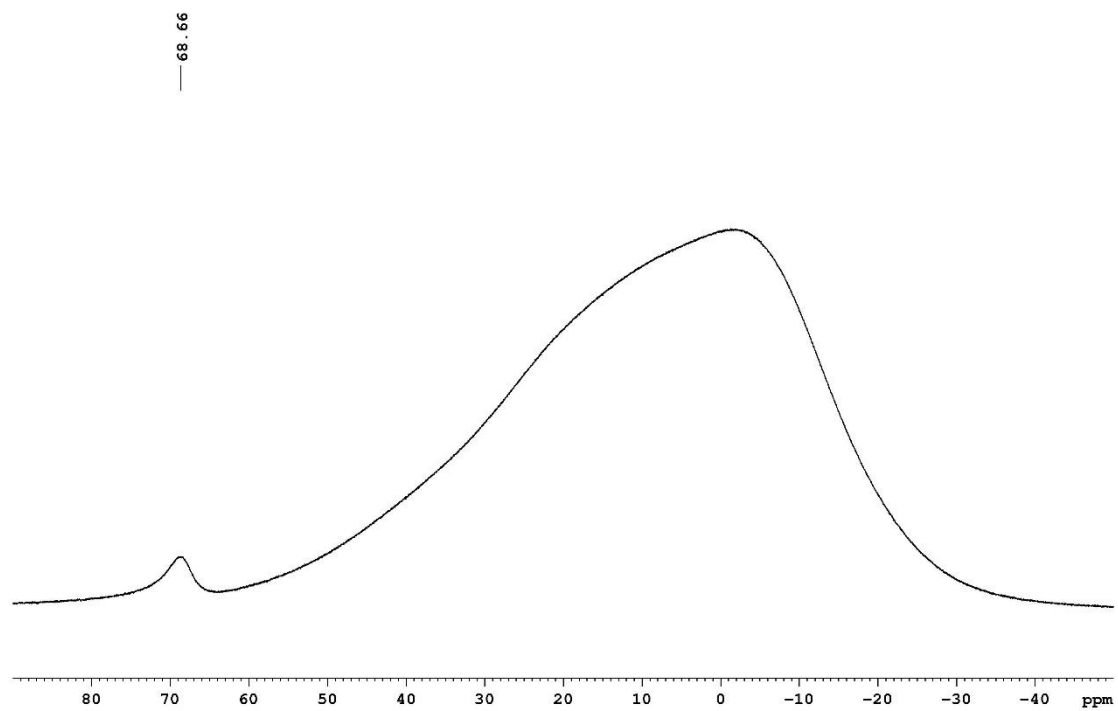

**Figure S65.**  $^{11}\text{B}$  NMR (160.5 MHz,  $\text{C}_6\text{D}_6$ , 298 K) spectrum of **2c**.

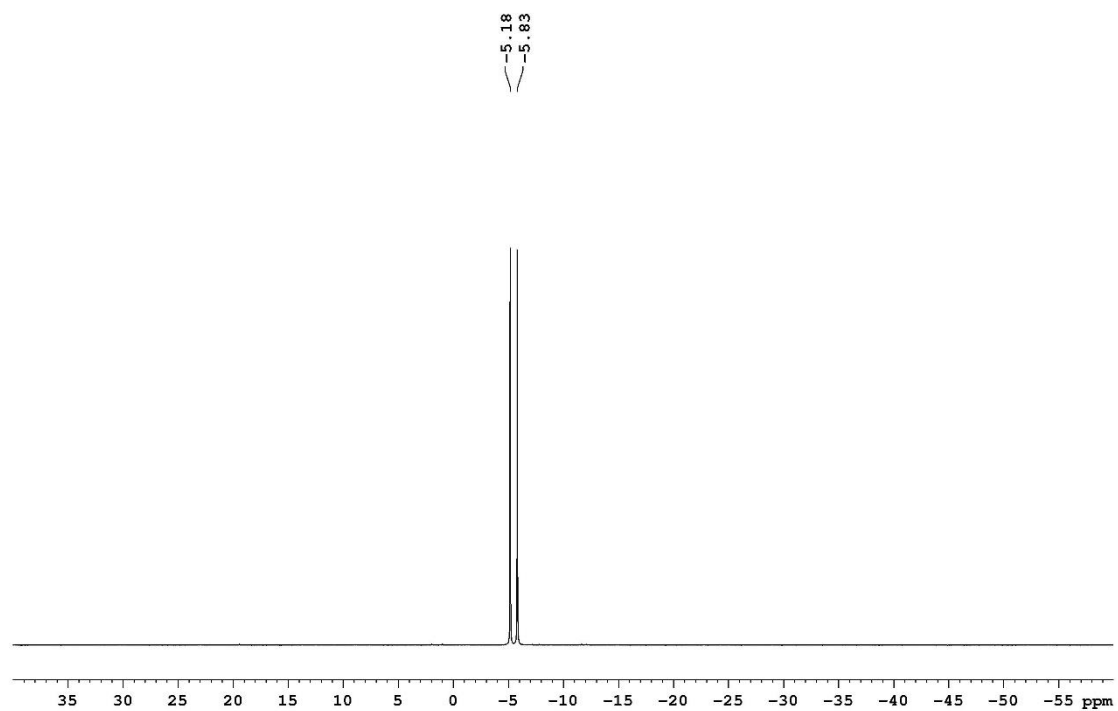

**Figure S66.**  $^{31}\text{P}\{^1\text{H}\}$  NMR (202.5 MHz,  $\text{C}_6\text{D}_6$ , 298 K) spectrum of **2c**.

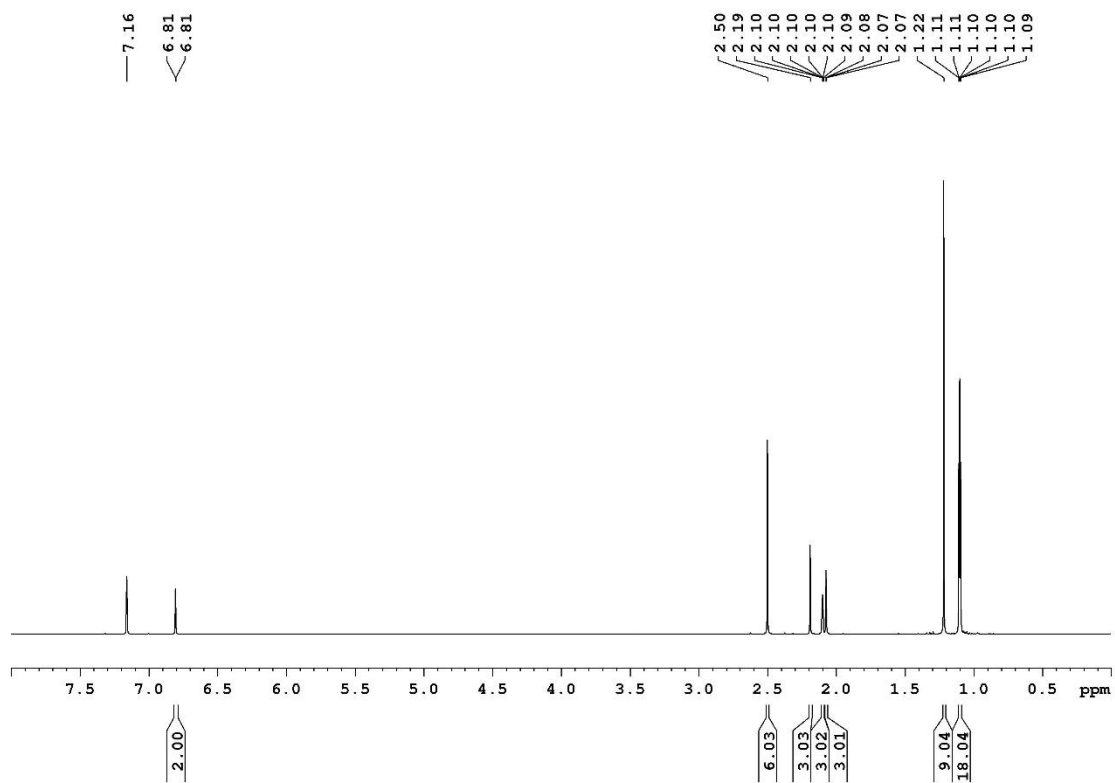

**Figure S67.**  $^1\text{H}$  NMR (500.1 MHz,  $\text{C}_6\text{D}_6$ , 298 K) spectrum of **2d**.

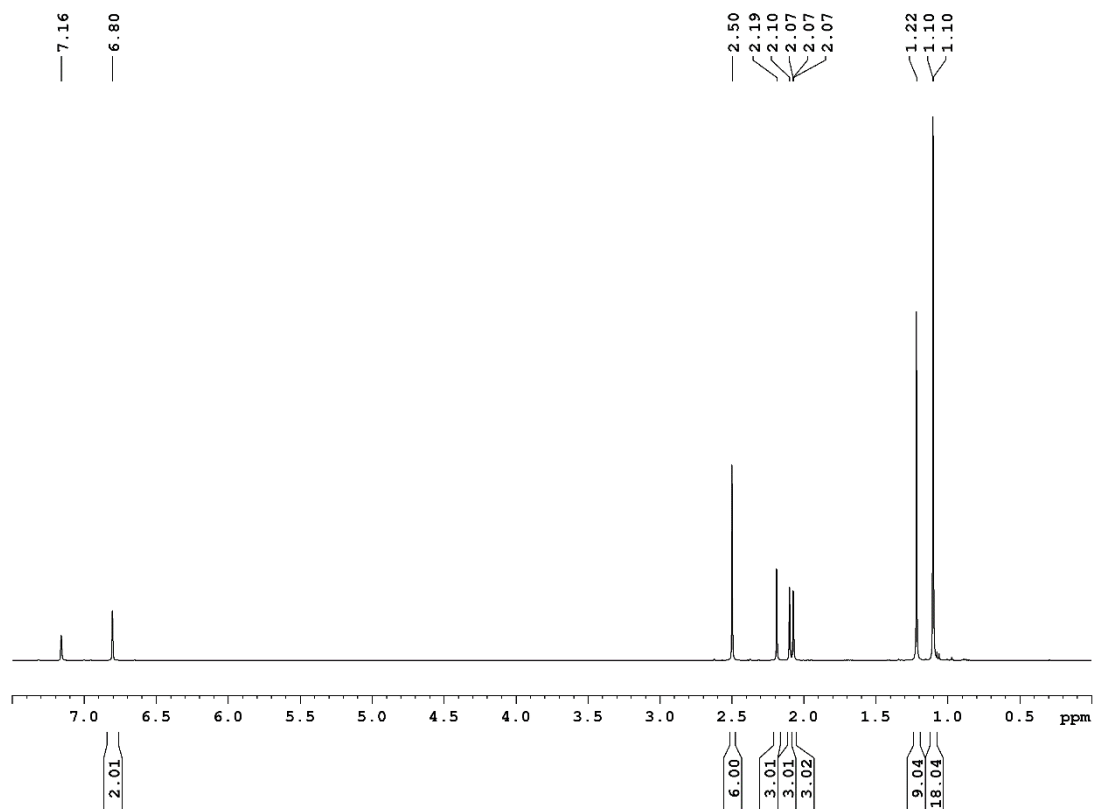

**Figure S68.**  $^1\text{H}\{^{31}\text{P}\}$  NMR (500.1 MHz,  $\text{C}_6\text{D}_6$ , 298 K) spectrum of **2d**.

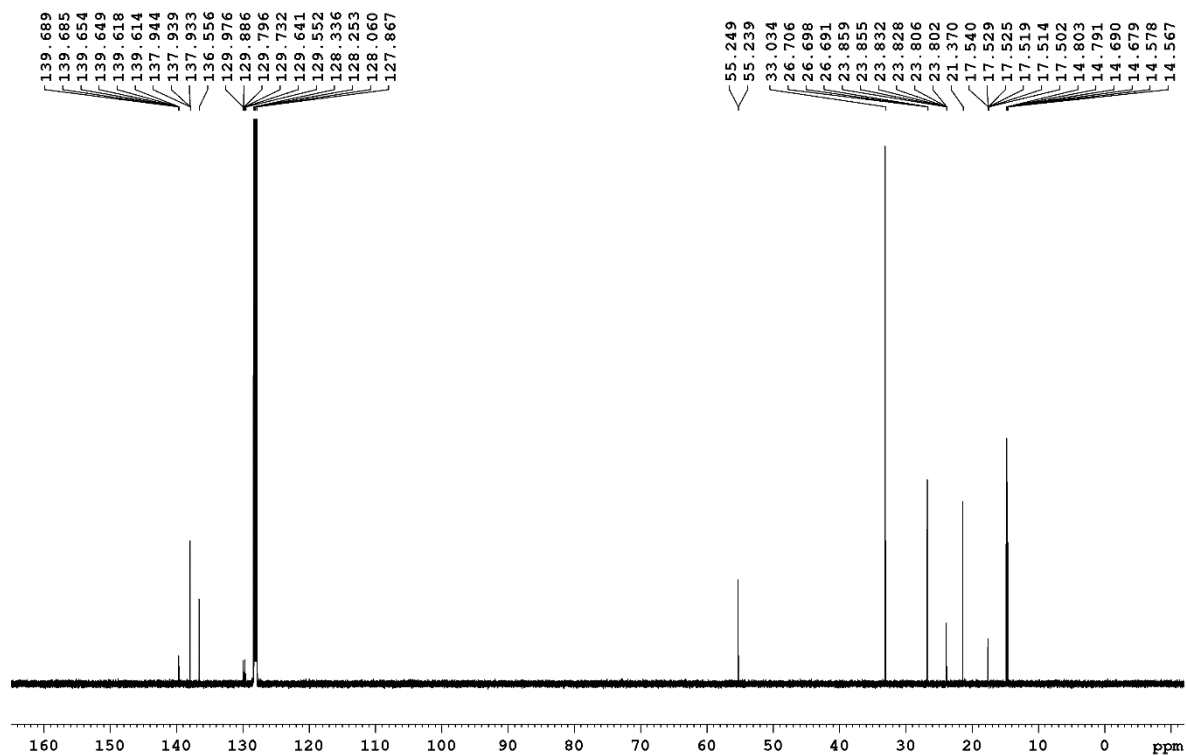

**Figure S69.**  $^{13}\text{C}\{^1\text{H}\}$  NMR (125.8 MHz,  $\text{C}_6\text{D}_6$ , 298 K) spectrum of **2d**.

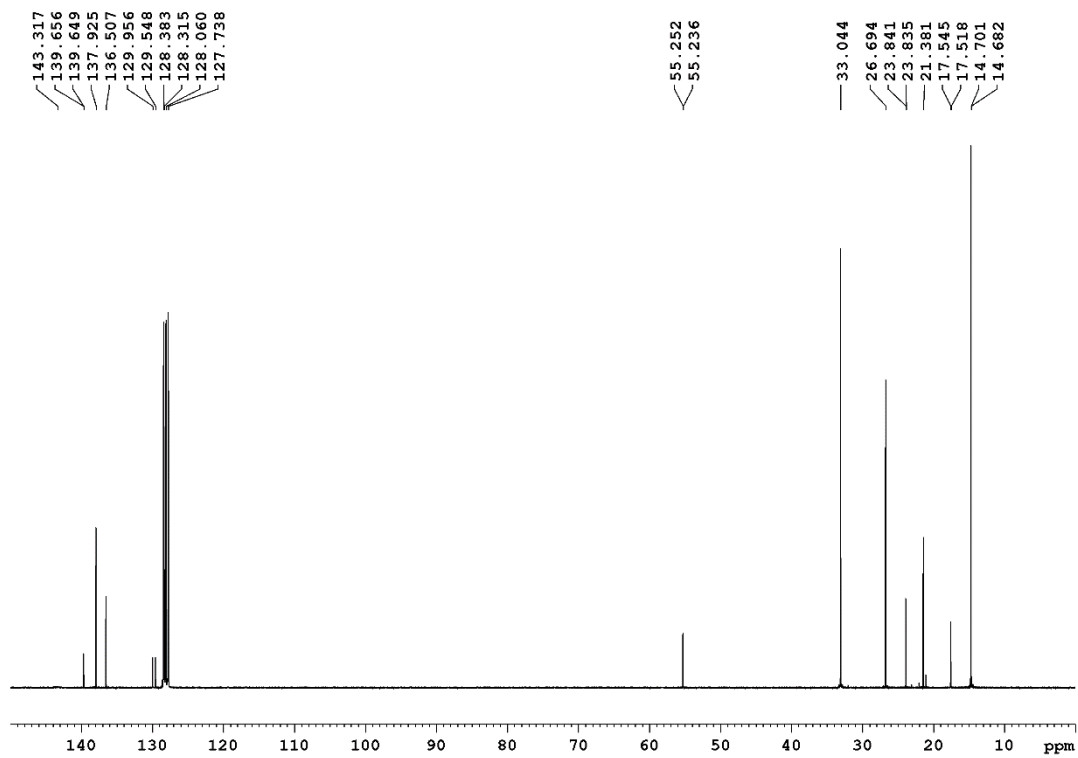

**Figure S70.**  $^{13}\text{C}\{^1\text{H}, ^{31}\text{P}\}$  NMR (75.5 MHz,  $\text{C}_6\text{D}_6$ , 298 K) spectrum of **2d**.

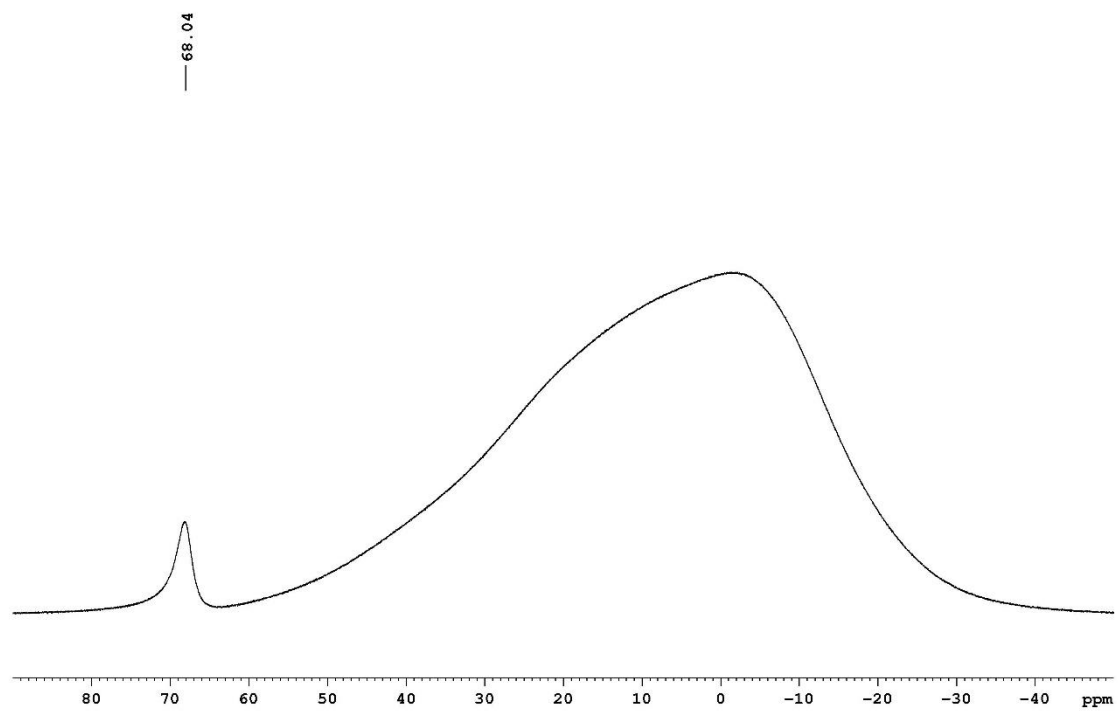

**Figure S71.**  $^{11}\text{B}$  NMR (160.5 MHz,  $\text{C}_6\text{D}_6$ , 298 K) spectrum of **2d**.

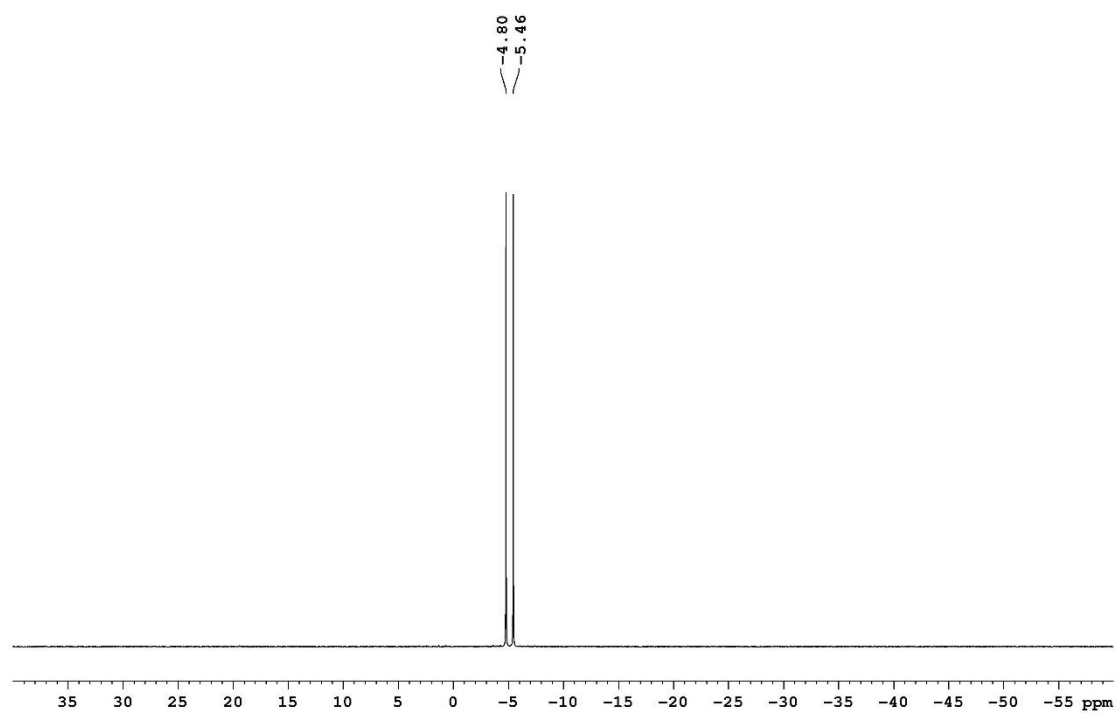

**Figure S72.**  $^{31}\text{P}\{^1\text{H}\}$  NMR (202.5 MHz,  $\text{C}_6\text{D}_6$ , 298 K) spectrum of **2d**.

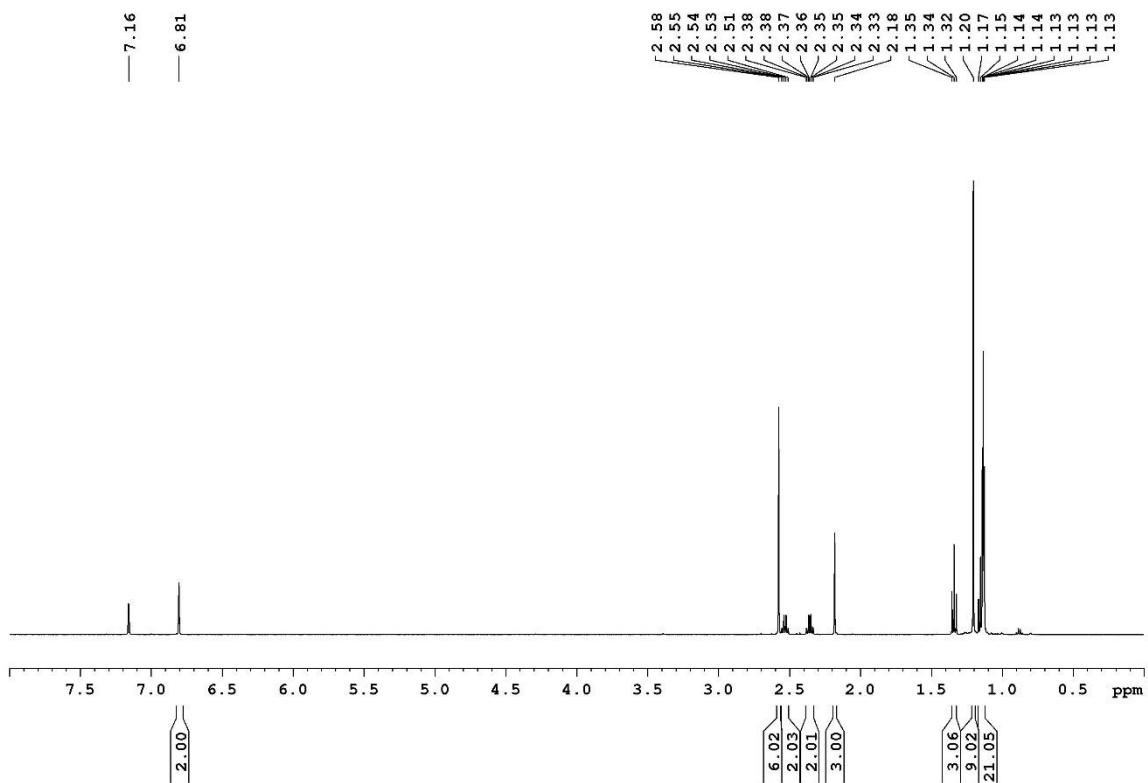

**Figure S73.**  $^1\text{H}$  NMR (500.1 MHz,  $\text{C}_6\text{D}_6$ , 298 K) spectrum of **2e**.

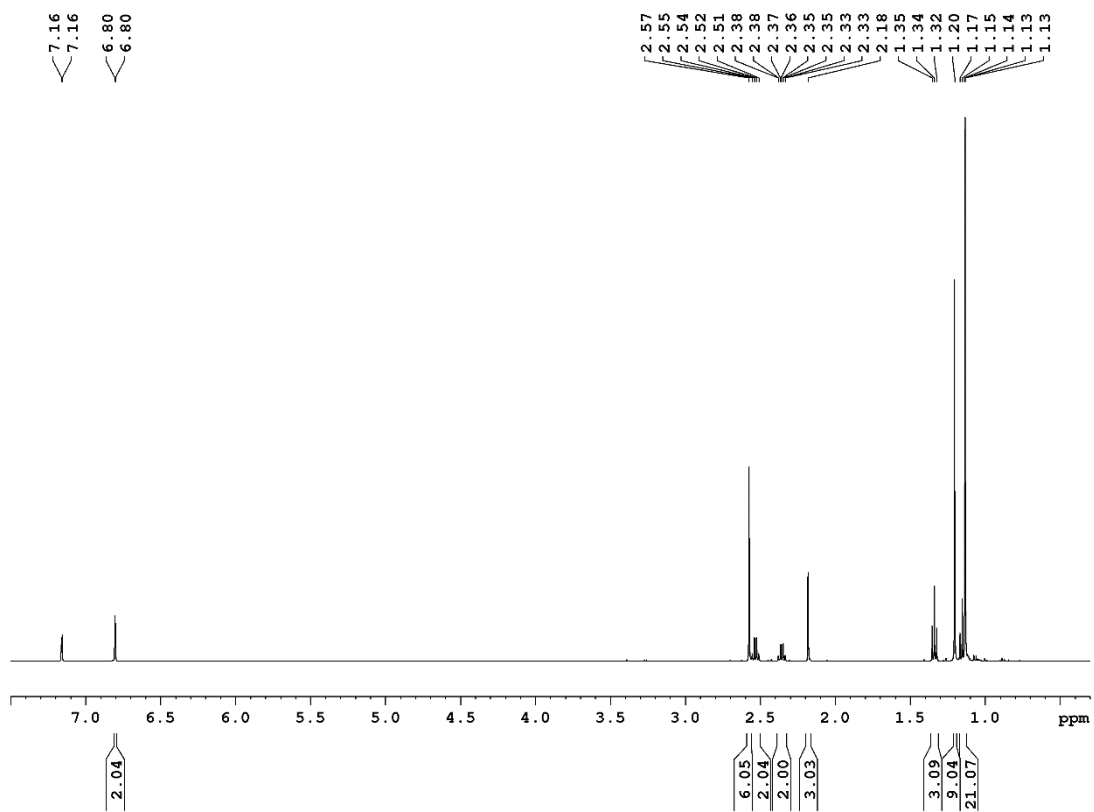

**Figure S74.**  $^1\text{H}\{^{31}\text{P}\}$  NMR (500.1 MHz,  $\text{C}_6\text{D}_6$ , 298 K) spectrum of **2e**.

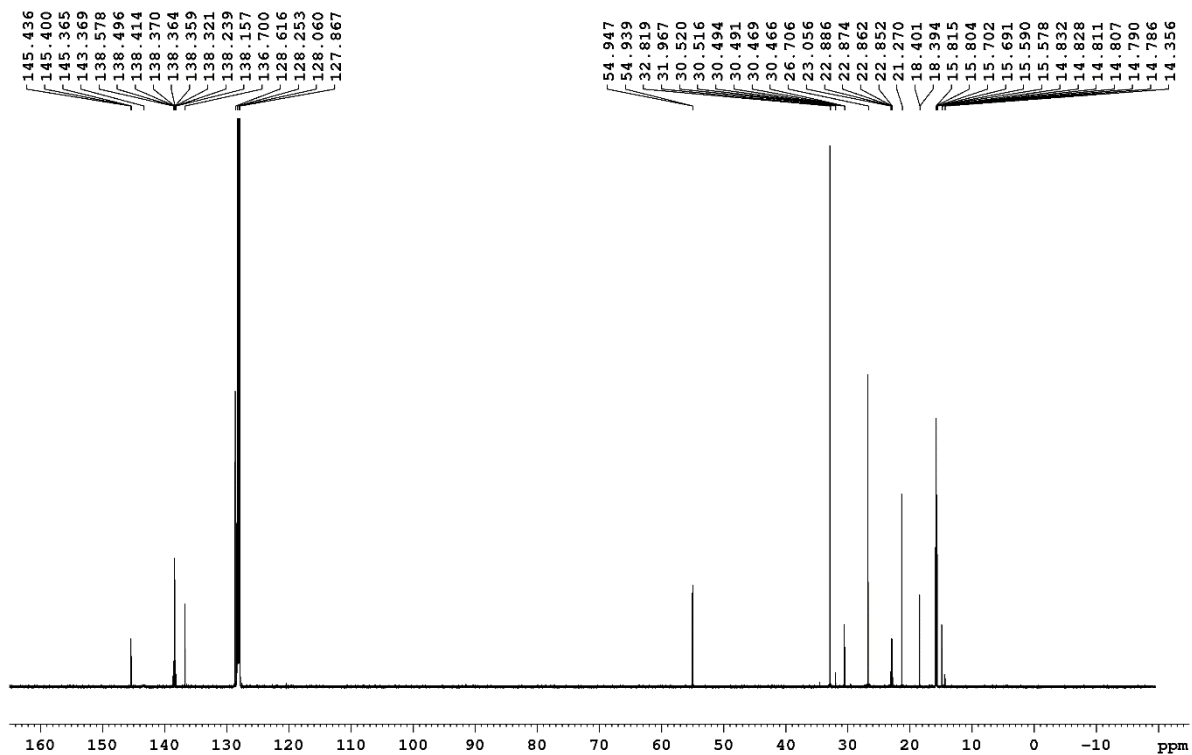

**Figure S75.**  $^{13}\text{C}\{^1\text{H}\}$  NMR (125.8 MHz,  $\text{C}_6\text{D}_6$ , 298 K) spectrum of **2e**.

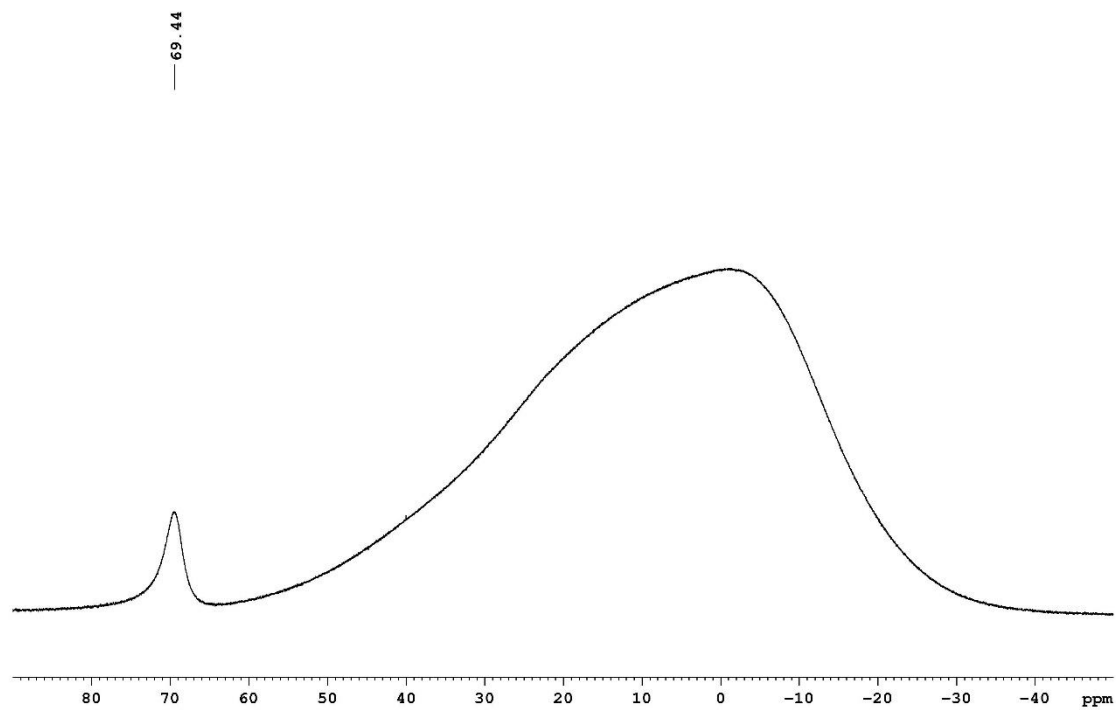

**Figure S76.**  $^{11}\text{B}$  NMR (160.5 MHz,  $\text{C}_6\text{D}_6$ , 298 K) spectrum of **2e**.

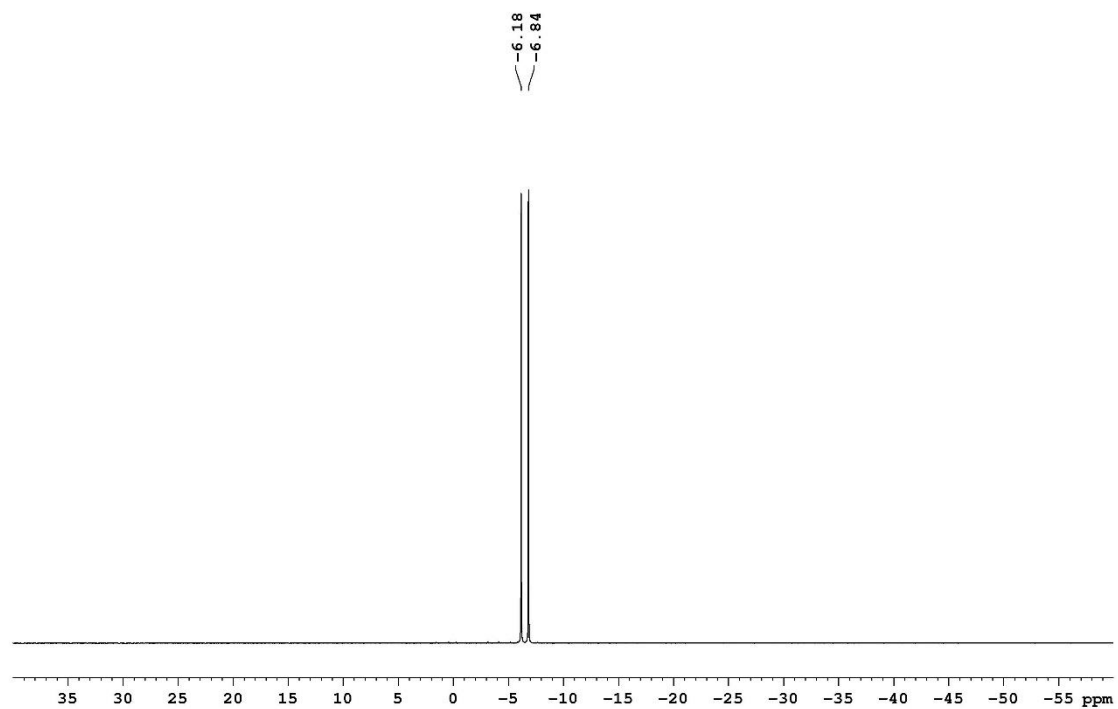

**Figure S77.**  $^{31}\text{P}\{^1\text{H}\}$  NMR (202.5 MHz,  $\text{C}_6\text{D}_6$ , 298 K) spectrum of **2e**.

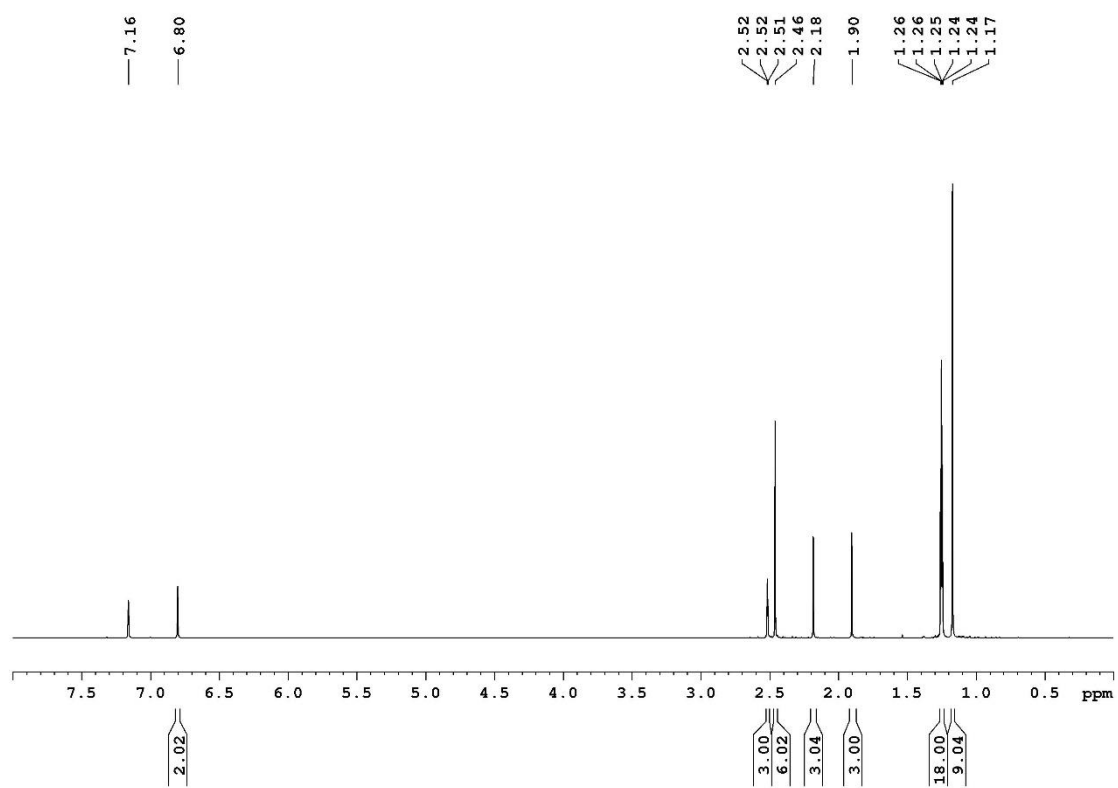

**Figure S78.**  $^1\text{H}$  NMR (500.1 MHz,  $\text{C}_6\text{D}_6$ , 298 K) spectrum of **2f**.



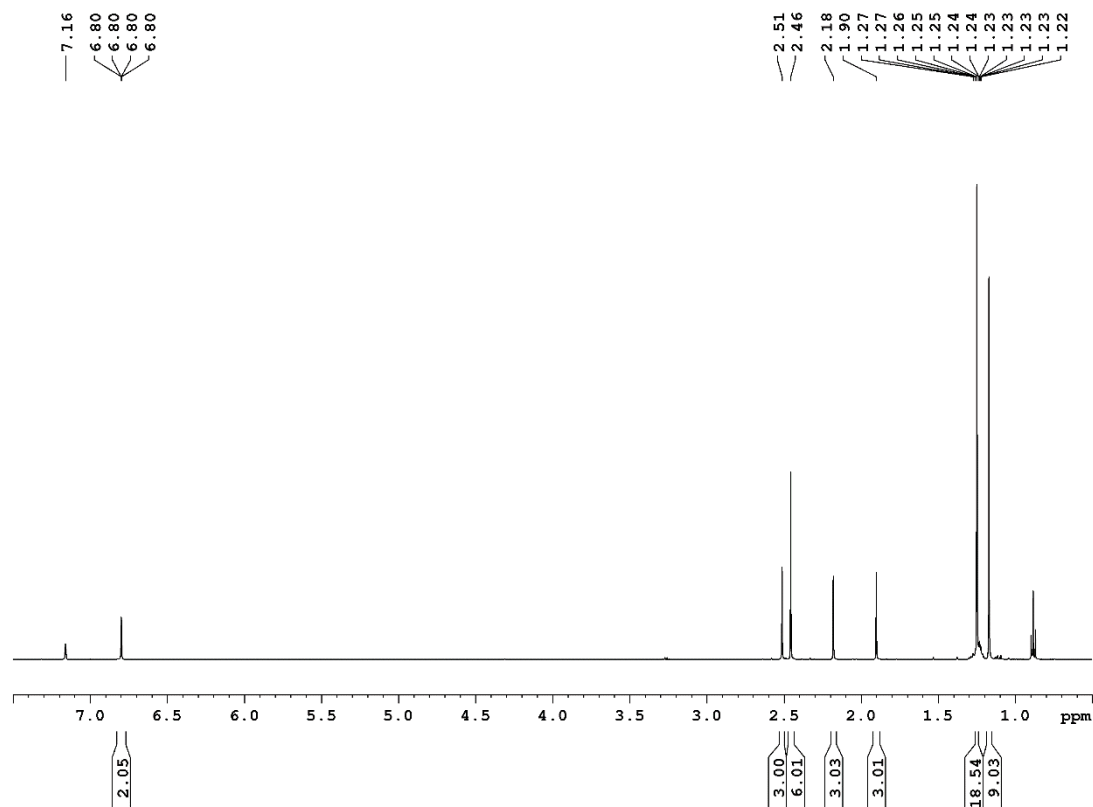

**Figure S79.**  $^1\text{H}\{^{31}\text{P}\}$  NMR (500.1 MHz,  $\text{C}_6\text{D}_6$ , 298 K) spectrum of **2f**.

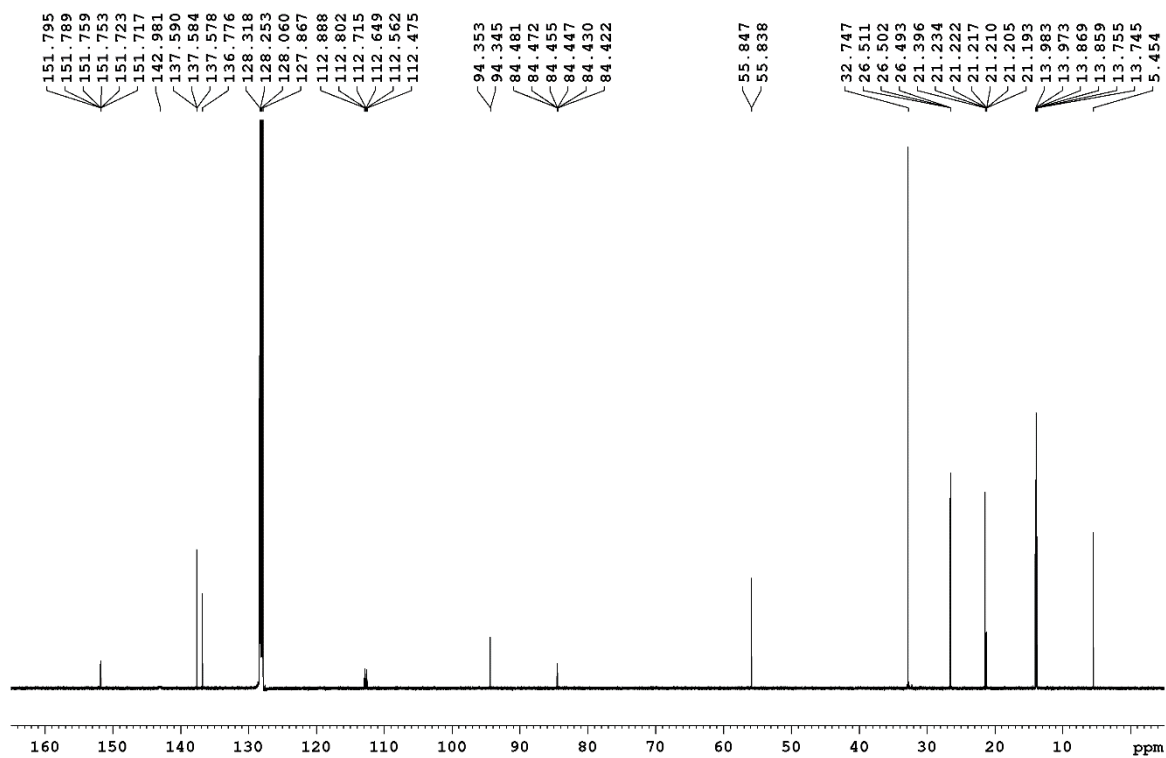

**Figure S80.**  $^{13}\text{C}\{^1\text{H}\}$  NMR (125.8 MHz,  $\text{C}_6\text{D}_6$ , 298 K) spectrum of **2f**.

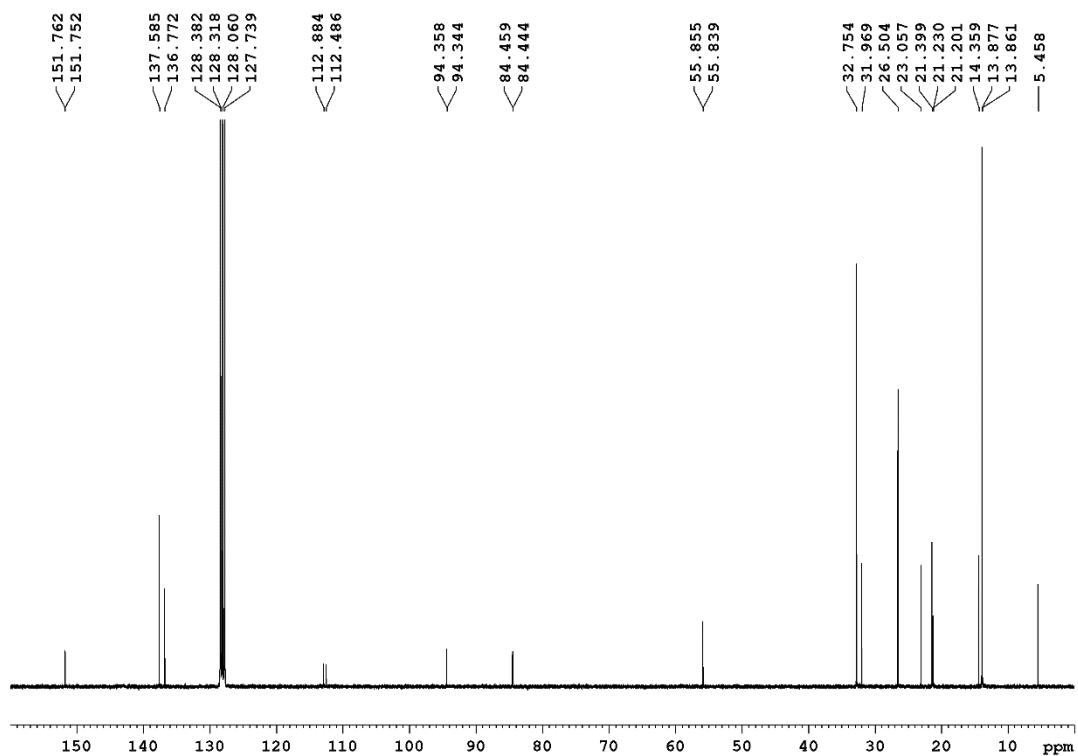

**Figure S81.**  $^{13}\text{C}\{^1\text{H}, ^{31}\text{P}\}$  NMR (75.5 MHz,  $\text{C}_6\text{D}_6$ , 298 K) spectrum of **2f**.

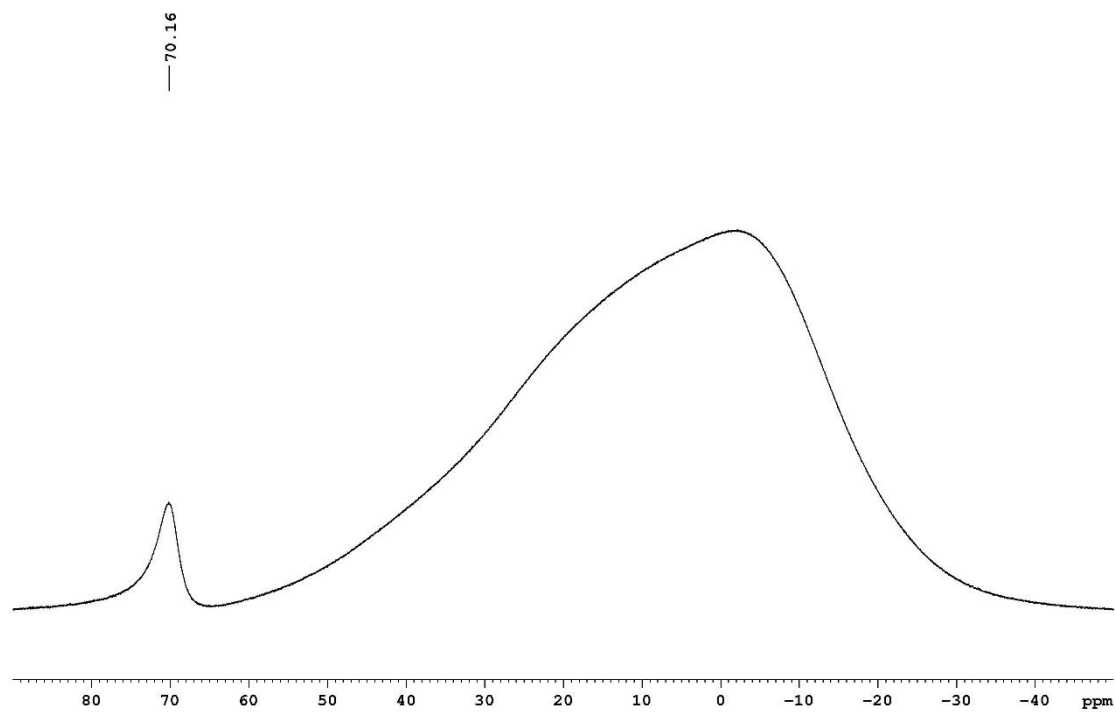

**Figure S82.**  $^{11}\text{B}$  NMR (160.5 MHz,  $\text{C}_6\text{D}_6$ , 298 K) spectrum of **2f**.

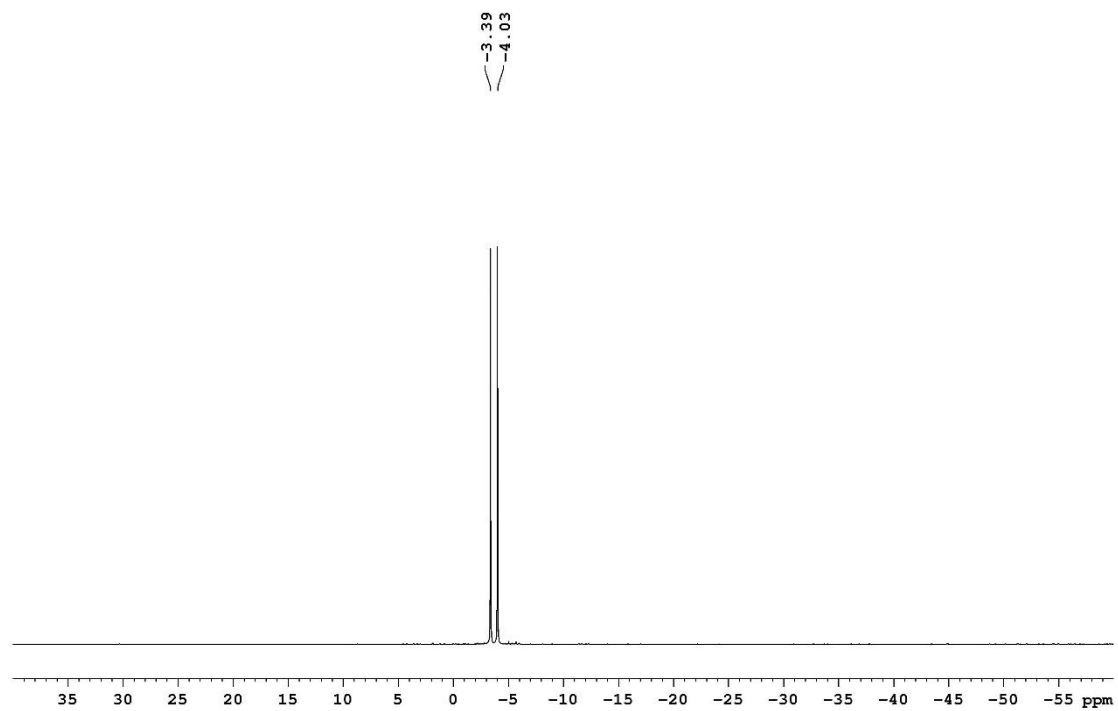

**Figure S83.** <sup>31</sup>P{<sup>1</sup>H} NMR (202.5 MHz, C<sub>6</sub>D<sub>6</sub>, 298 K) spectrum of **2f**.

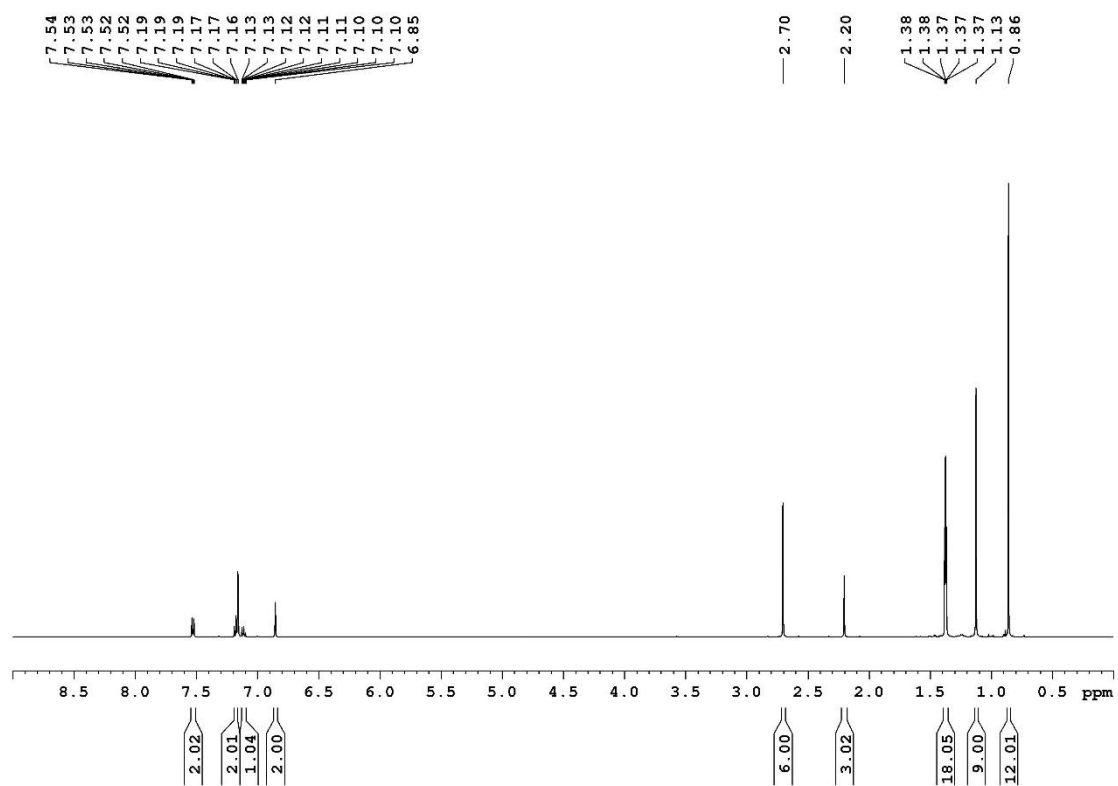

**Figure S84.** <sup>1</sup>H NMR (500.1 MHz, C<sub>6</sub>D<sub>6</sub>, 298 K) spectrum of **2g**.

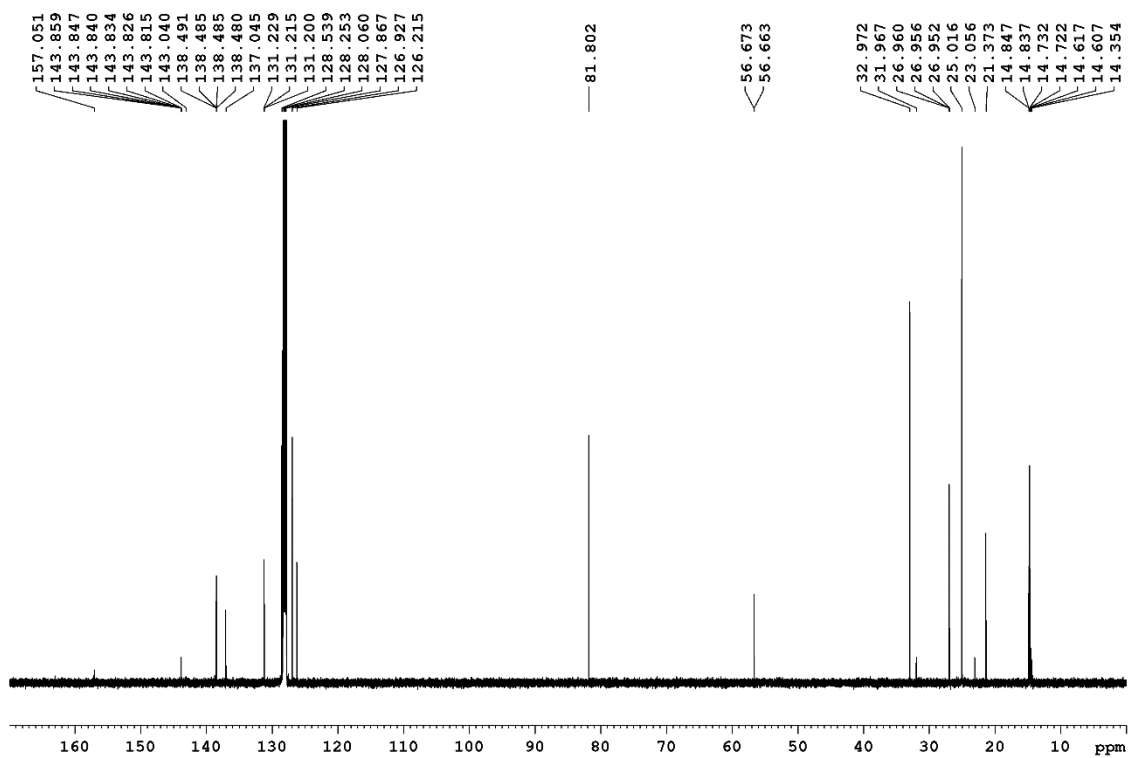

Figure S85.  $^{13}\text{C}\{^1\text{H}\}$  NMR (125.8 MHz,  $\text{C}_6\text{D}_6$ , 298 K) spectrum of **2g**.

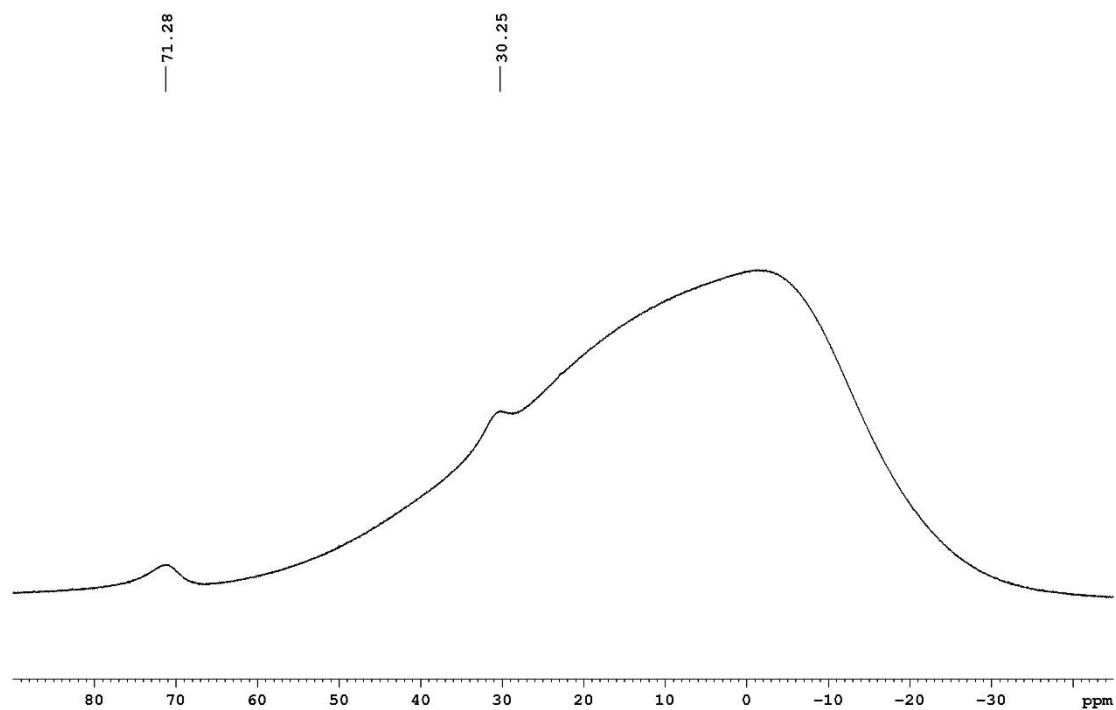

Figure S86.  $^{11}\text{B}$  NMR (160.5 MHz,  $\text{C}_6\text{D}_6$ , 298 K) spectrum of **2g**.

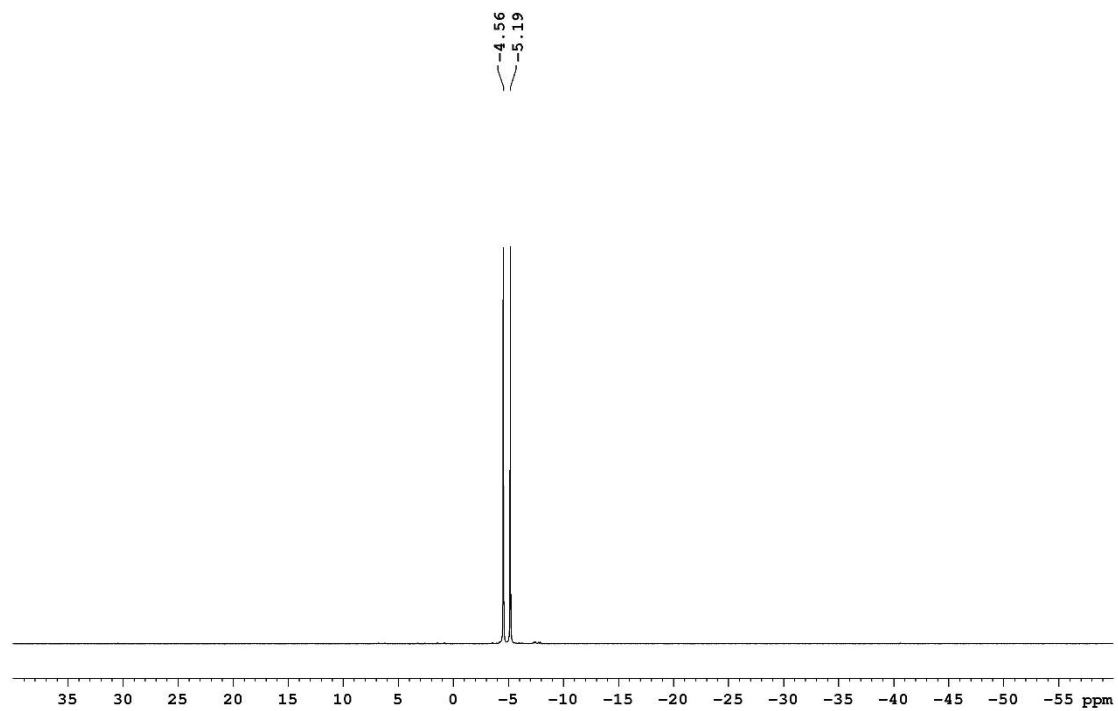

**Figure S87.**  $^{31}\text{P}\{^1\text{H}\}$  NMR (202.5 MHz,  $\text{C}_6\text{D}_6$ , 298 K) spectrum of **2g**.

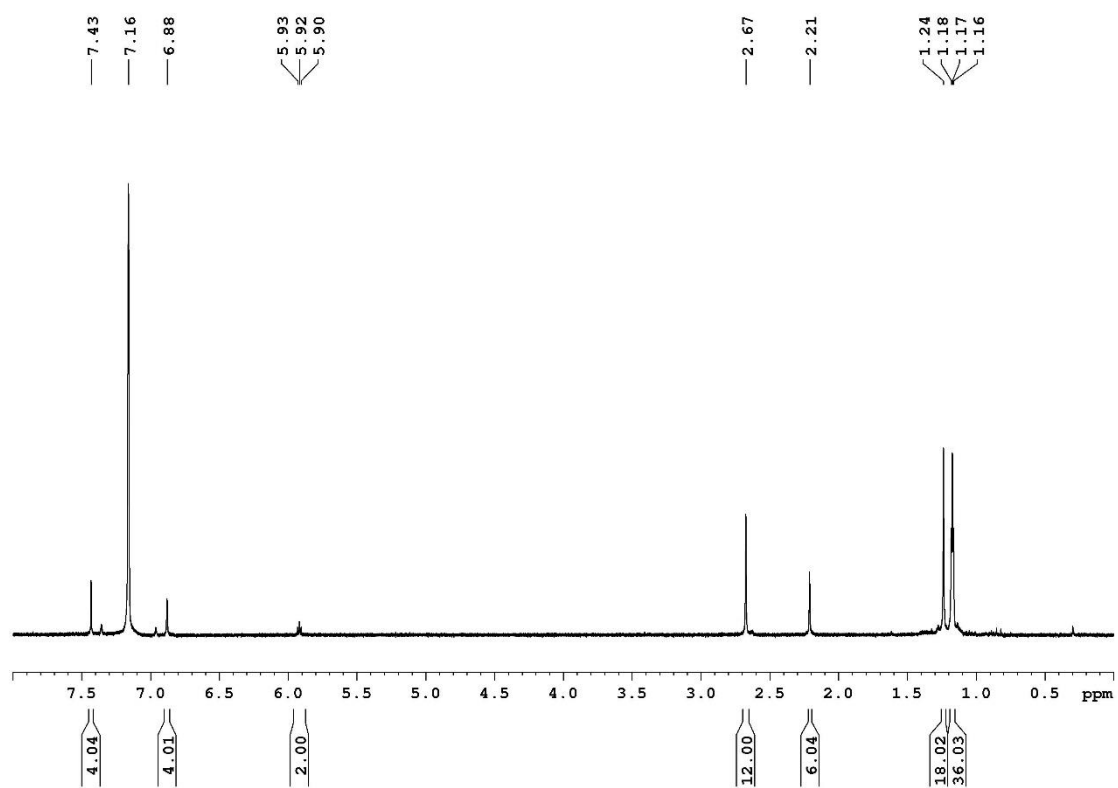

**Figure S88.**  $^1\text{H}$  NMR (400.6 MHz,  $\text{C}_6\text{D}_6$ , 298 K) spectrum of **2l**.

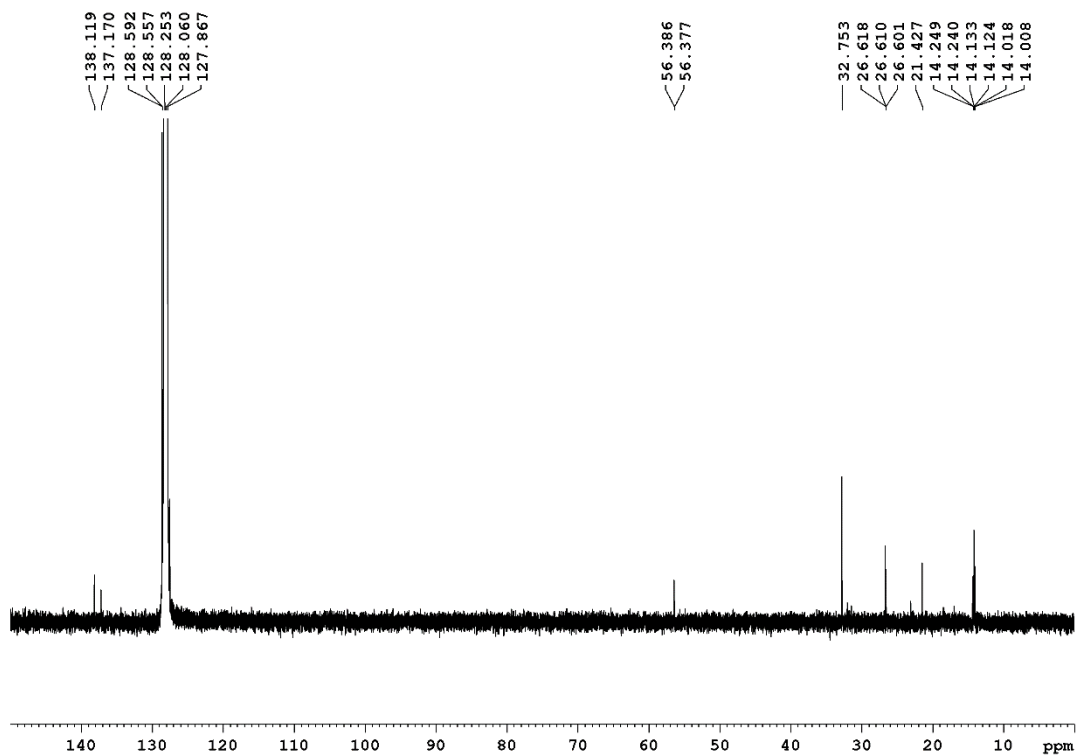

Figure S89.  $^{13}\text{C}\{^1\text{H}\}$  NMR (125.8 MHz,  $\text{C}_6\text{D}_6$ , 298 K) spectrum of **2l**.

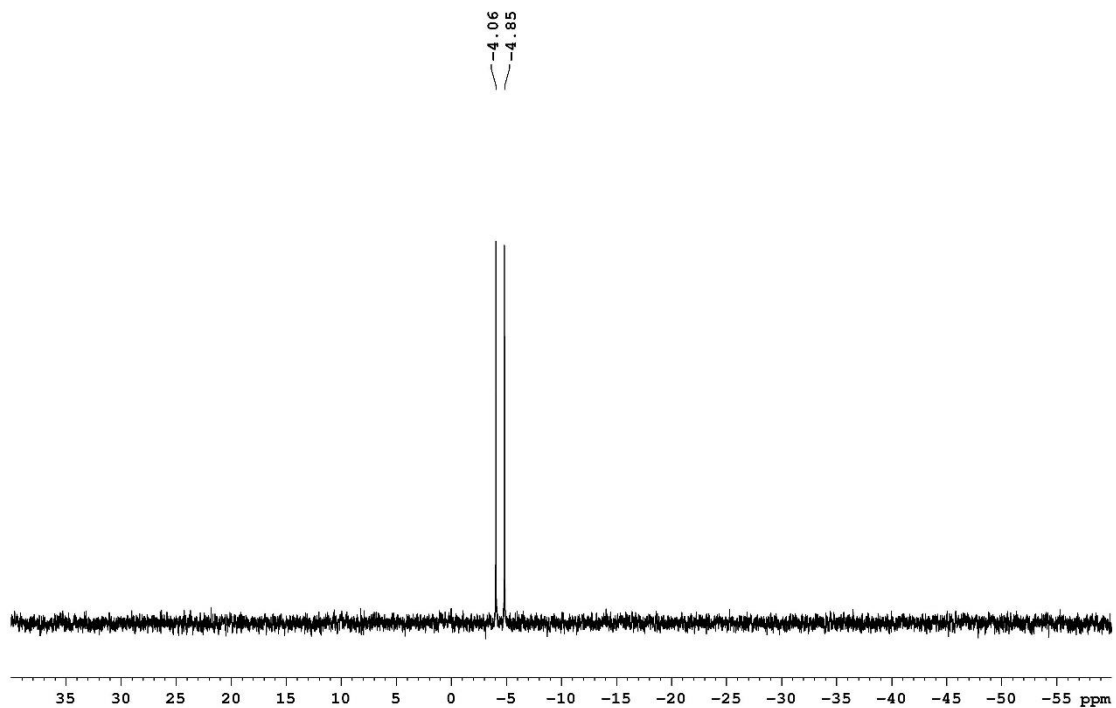

Figure S90.  $^{31}\text{P}\{^1\text{H}\}$  NMR (162.2 MHz,  $\text{C}_6\text{D}_6$ , 298 K) spectrum of **2l**.

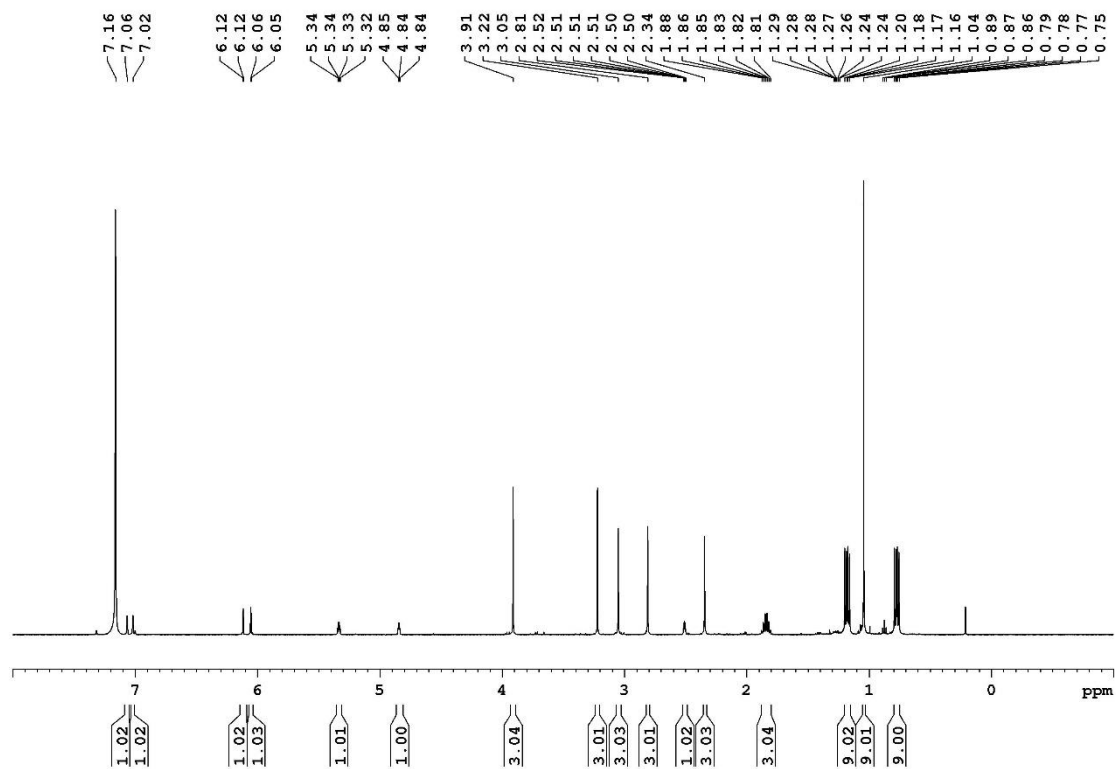

Figure S91.  $^1\text{H}$  NMR (500.1 MHz,  $\text{C}_6\text{D}_6$ , 298 K) spectrum of  $3\text{a}^{\text{Me}}$ .

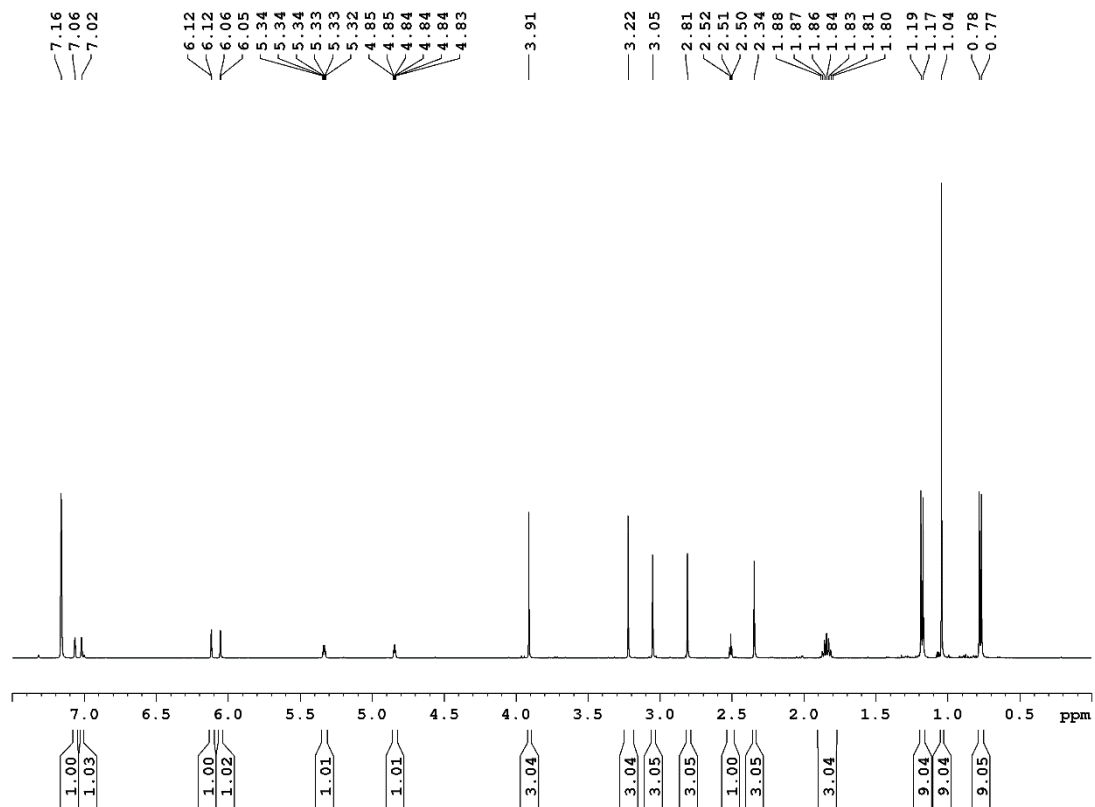

Figure S92.  $^1\text{H}\{^{31}\text{P}\}$  NMR (500.1 MHz,  $\text{C}_6\text{D}_6$ , 298 K) spectrum of  $3\text{a}^{\text{Me}}$ .

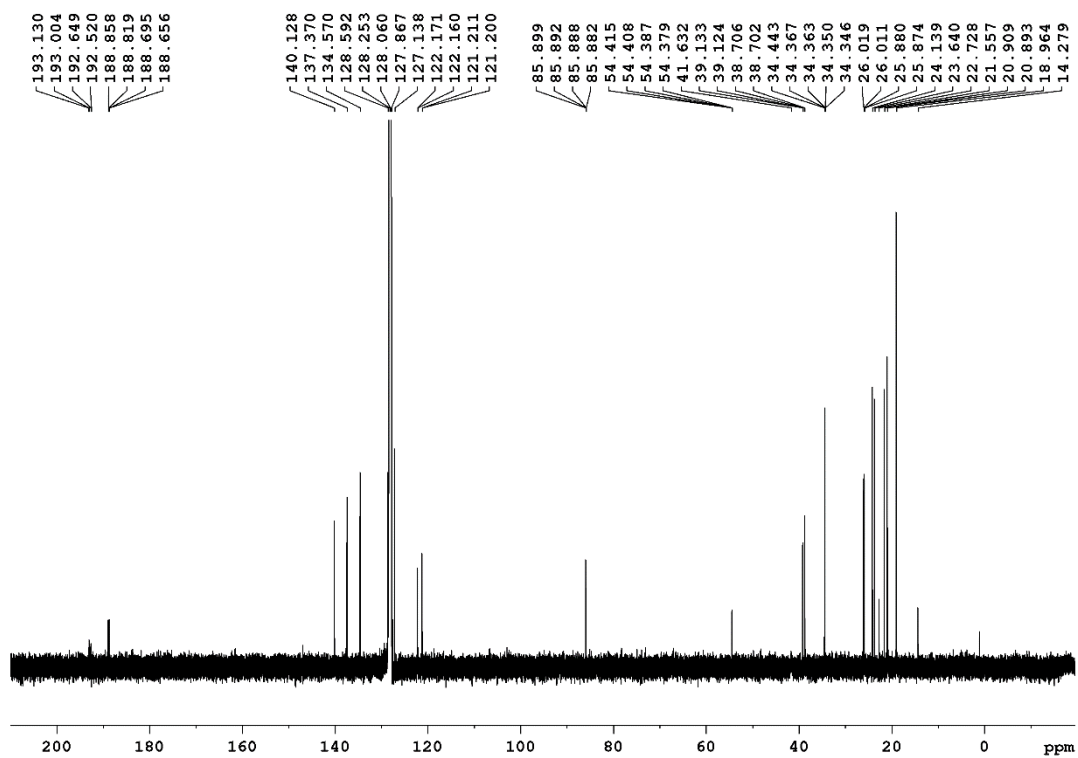

Figure S93.  $^{13}\text{C}\{^1\text{H}\}$  NMR (125.8 MHz,  $\text{C}_6\text{D}_6$ , 298 K) spectrum of  $3\text{a}^{\text{Me}}$ .

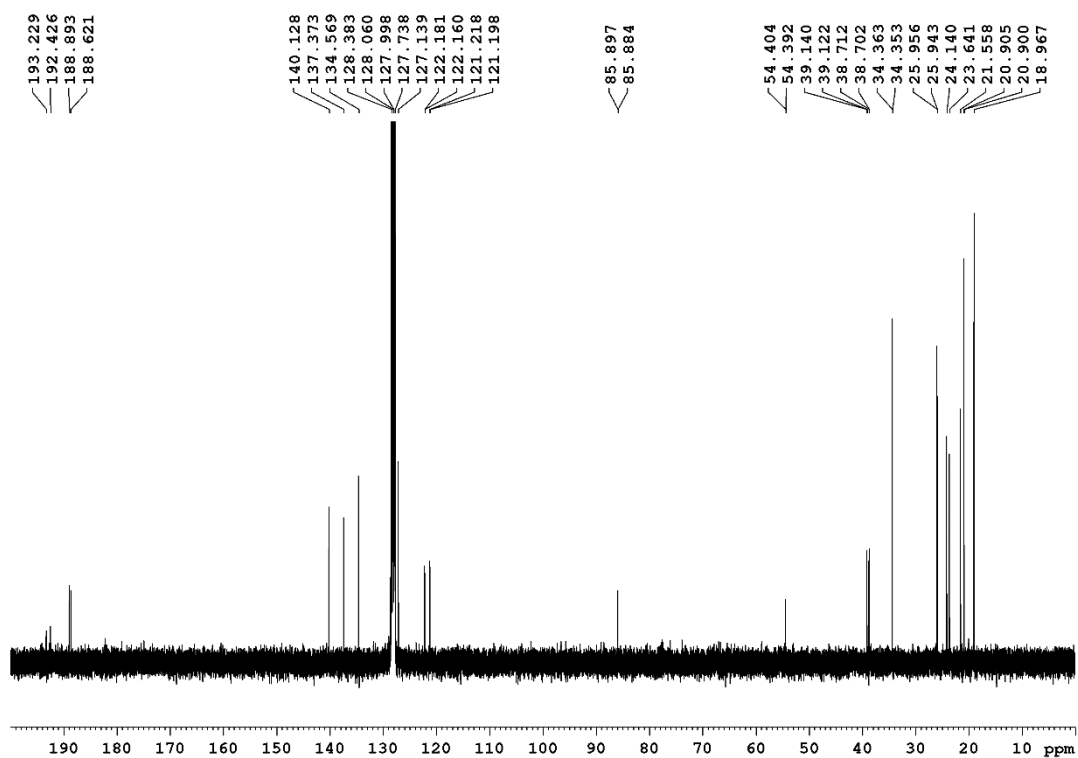

Figure S94.  $^{13}\text{C}\{^1\text{H}, ^{31}\text{P}\}$  NMR (75.5 MHz,  $\text{C}_6\text{D}_6$ , 298 K) spectrum of  $3\text{a}^{\text{Me}}$ .



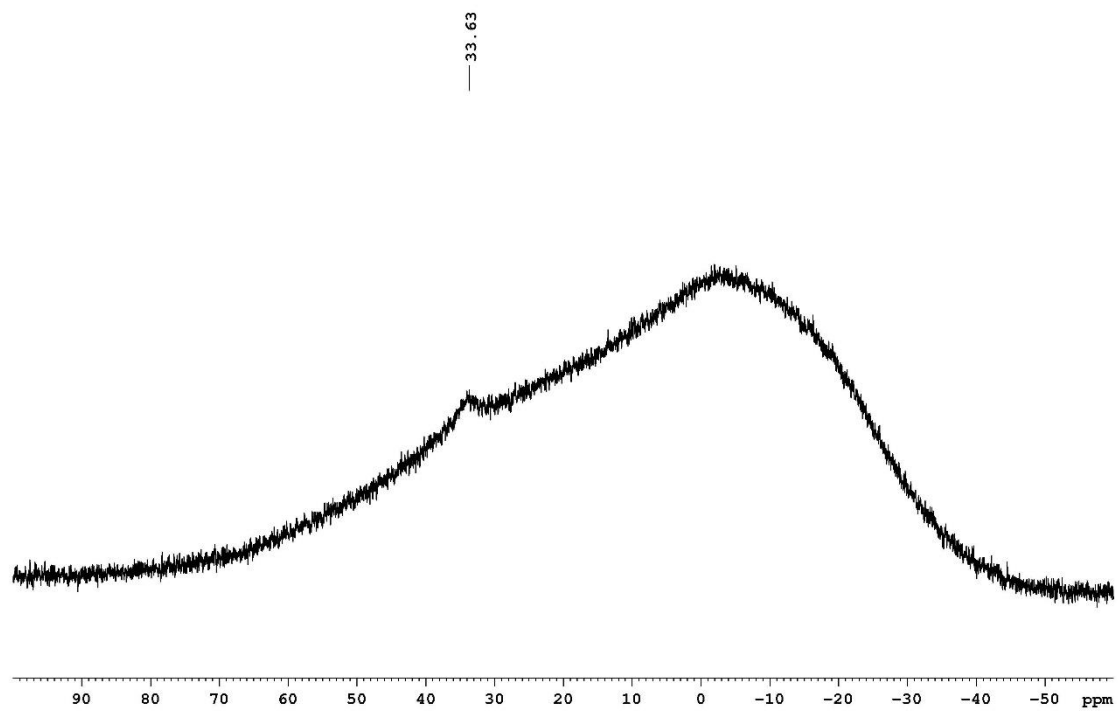

**Figure S95.**  $^{11}\text{B}$  NMR (128.5 MHz,  $\text{C}_6\text{D}_6$ , 298 K) spectrum of  $3\text{a}^{\text{Me}}$ .

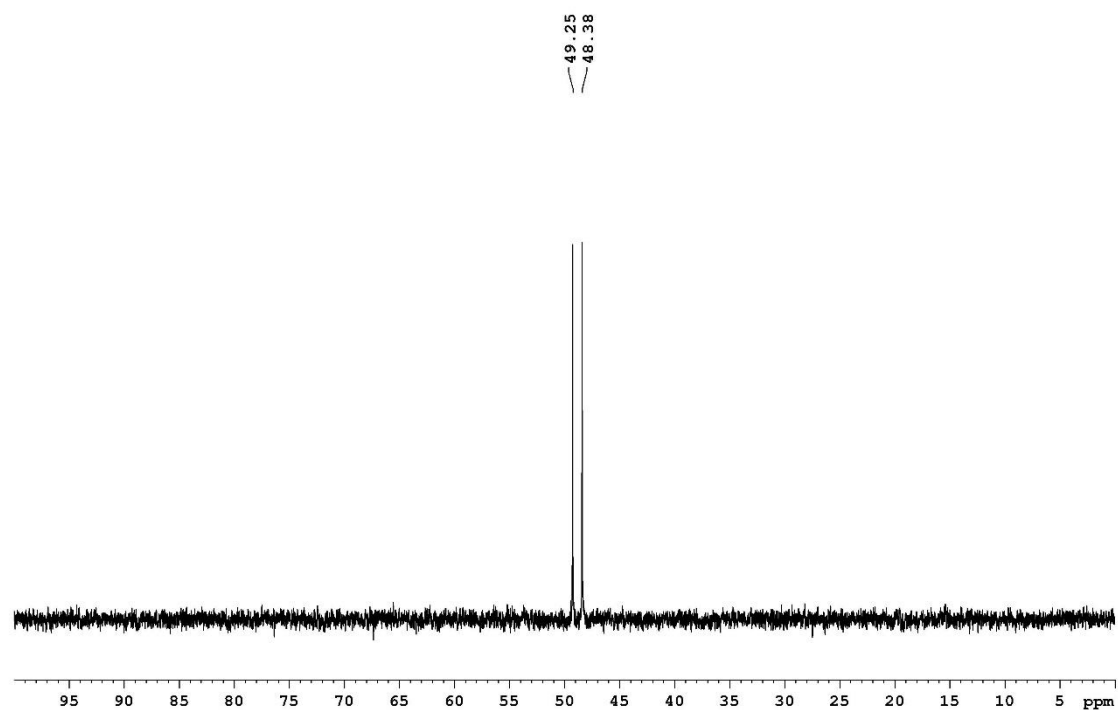

**Figure S96.**  $^{31}\text{P}\{^1\text{H}\}$  NMR (162.2 MHz,  $\text{C}_6\text{D}_6$ , 298 K) spectrum of  $3\text{a}^{\text{Me}}$ .

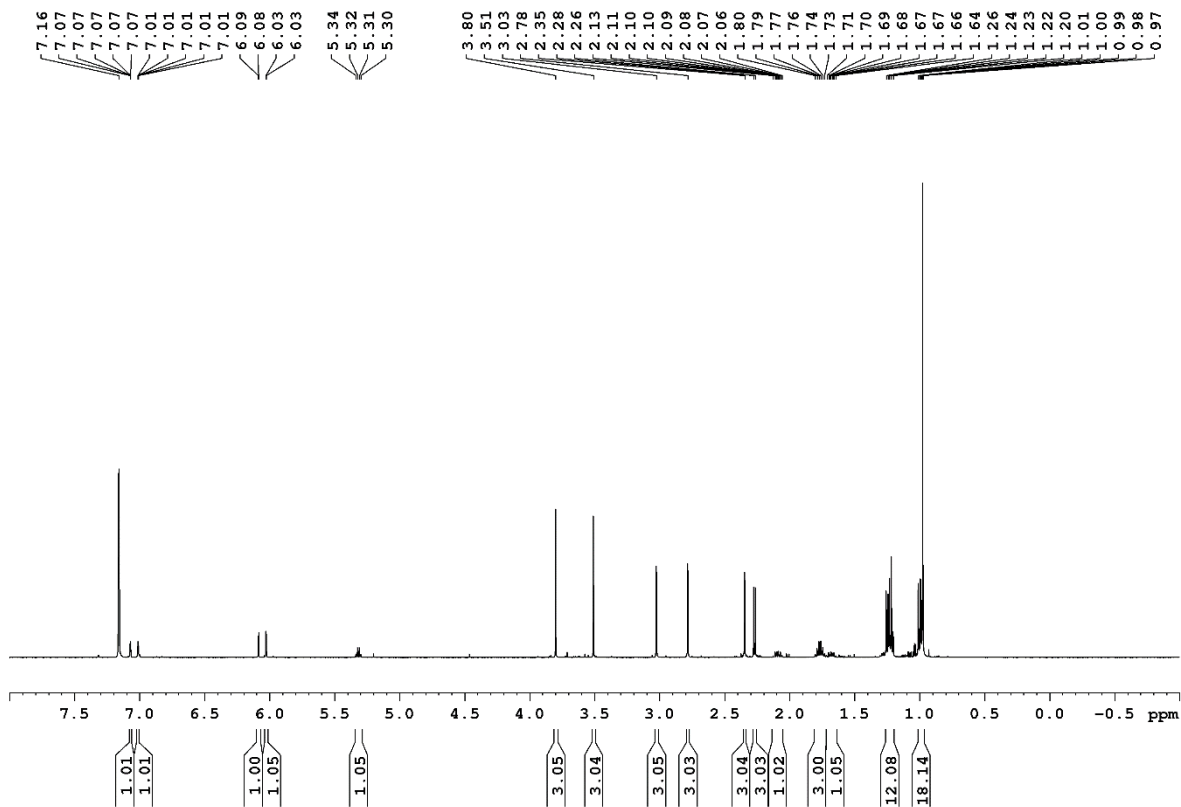

Figure S97.  $^1\text{H}$  NMR (500.1 MHz,  $\text{C}_6\text{D}_6$ , 298 K) spectrum of  $3\text{e}^{\text{Me}}$ .

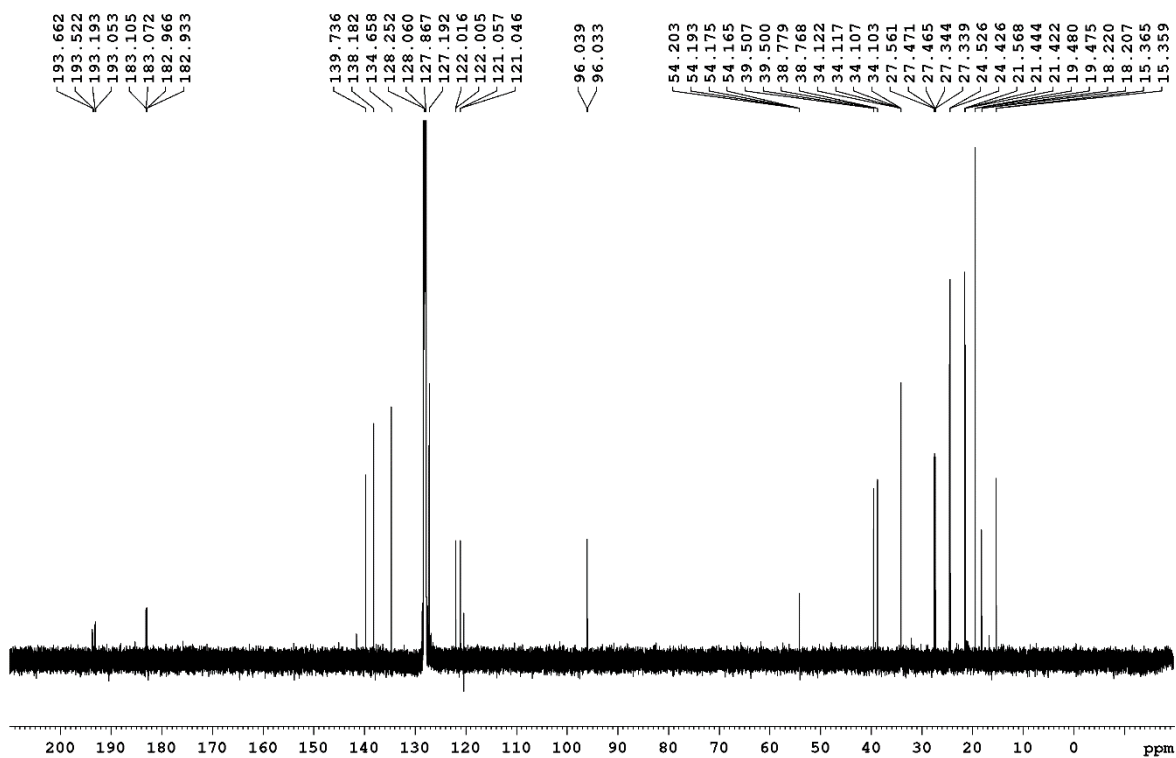

Figure S98.  $^{13}\text{C}\{^1\text{H}\}$  NMR (125.8 MHz,  $\text{C}_6\text{D}_6$ , 298 K) spectrum of  $3\text{e}^{\text{Me}}$ .

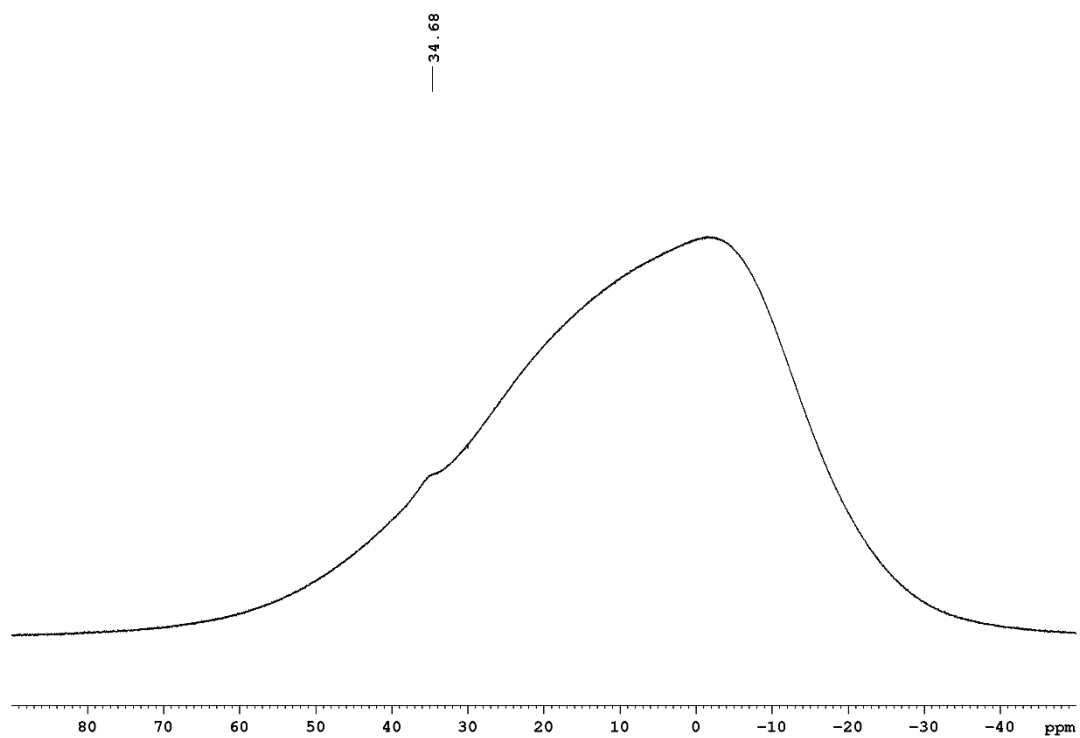

**Figure S99.**  $^{11}\text{B}$  NMR (160.5 MHz,  $\text{C}_6\text{D}_6$ , 298 K) spectrum of  $3\text{e}^{\text{Me}}$ .

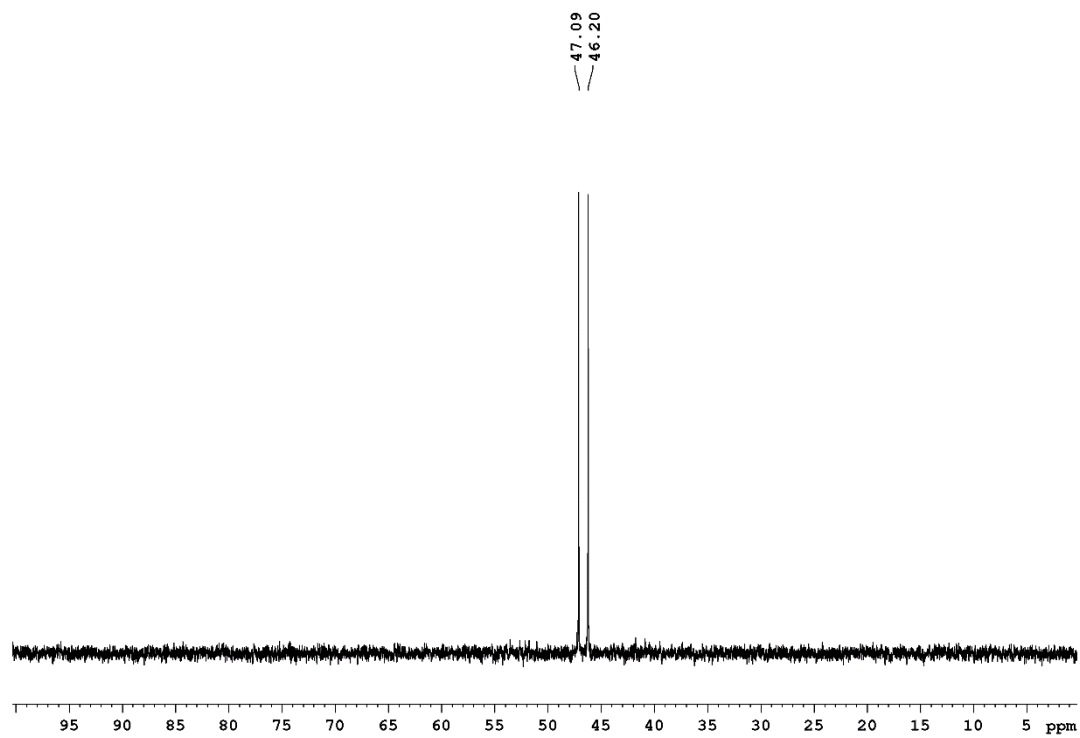

**Figure S100.**  $^{31}\text{P}\{^1\text{H}\}$  NMR (162.2 MHz,  $\text{C}_6\text{D}_6$ , 298 K) spectrum of  $3\text{e}^{\text{Me}}$ .

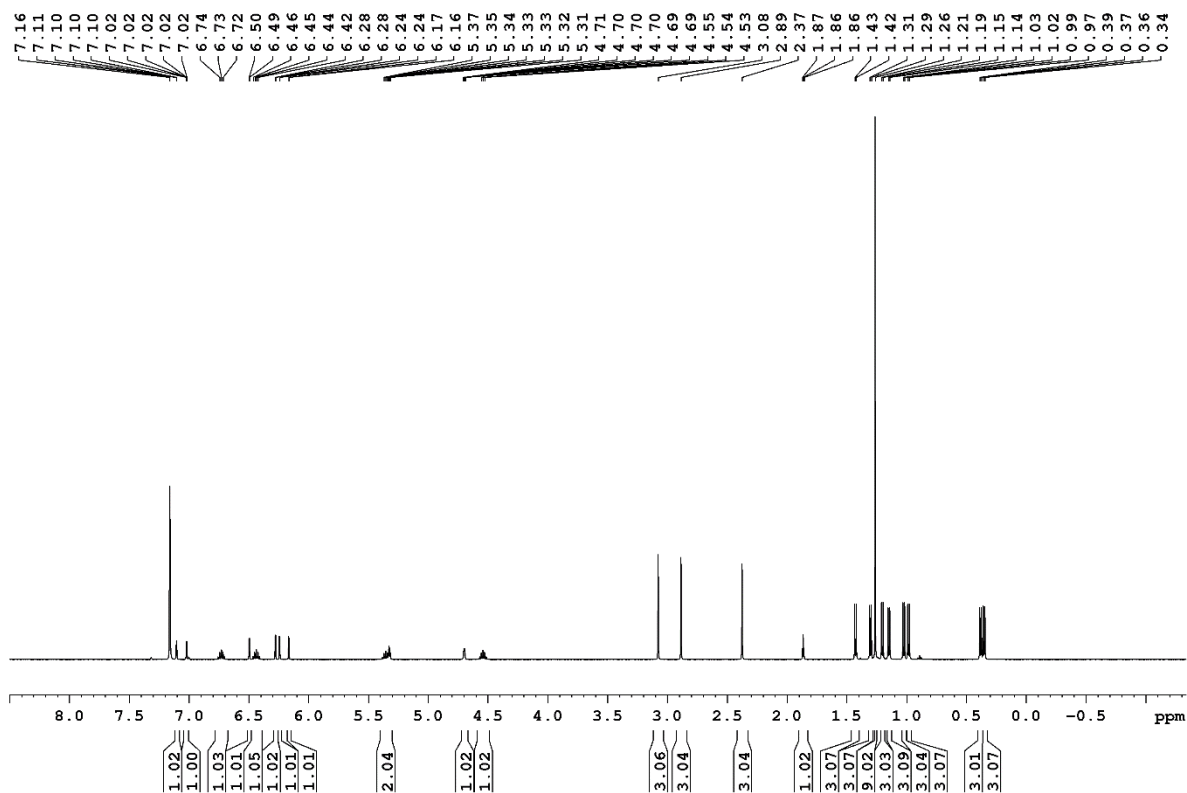

Figure S101.  $^1\text{H}$  NMR (500.1 MHz,  $\text{C}_6\text{D}_6$ , 298 K) spectrum of  $4\text{a}^{\text{iPr}}$ .

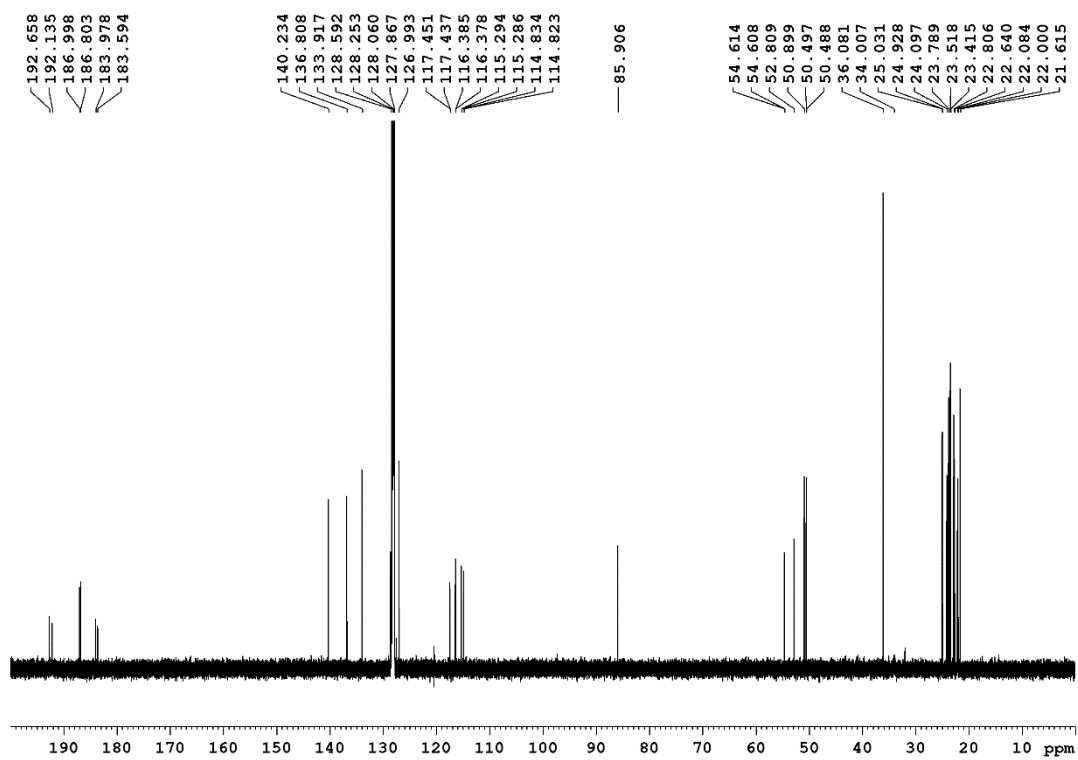

Figure S102.  $^{13}\text{C}\{^1\text{H}\}$  NMR (125.8 MHz,  $\text{C}_6\text{D}_6$ , 298 K) spectrum of  $4\text{a}^{\text{iPr}}$ .

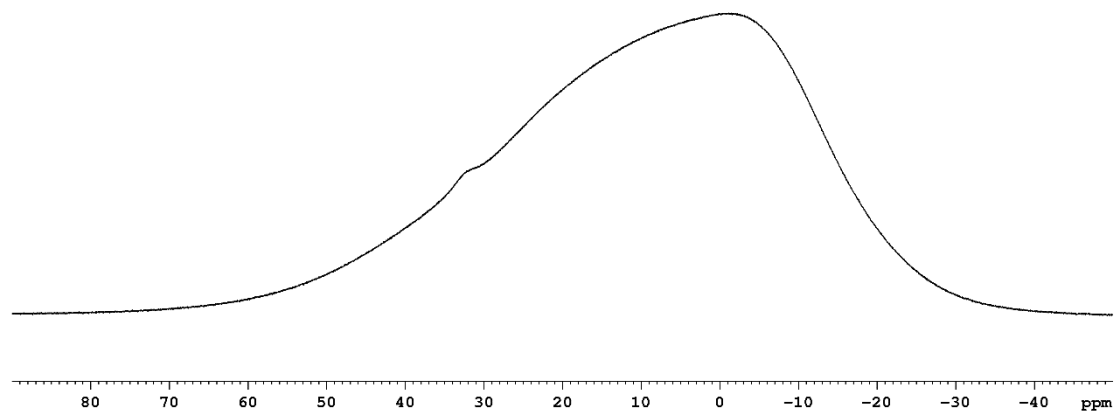

Figure S103.  $^{11}\text{B}$  NMR (160.5 MHz,  $\text{C}_6\text{D}_6$ , 298 K) spectrum of  $4\mathbf{a}^{i\text{Pr}}$ .

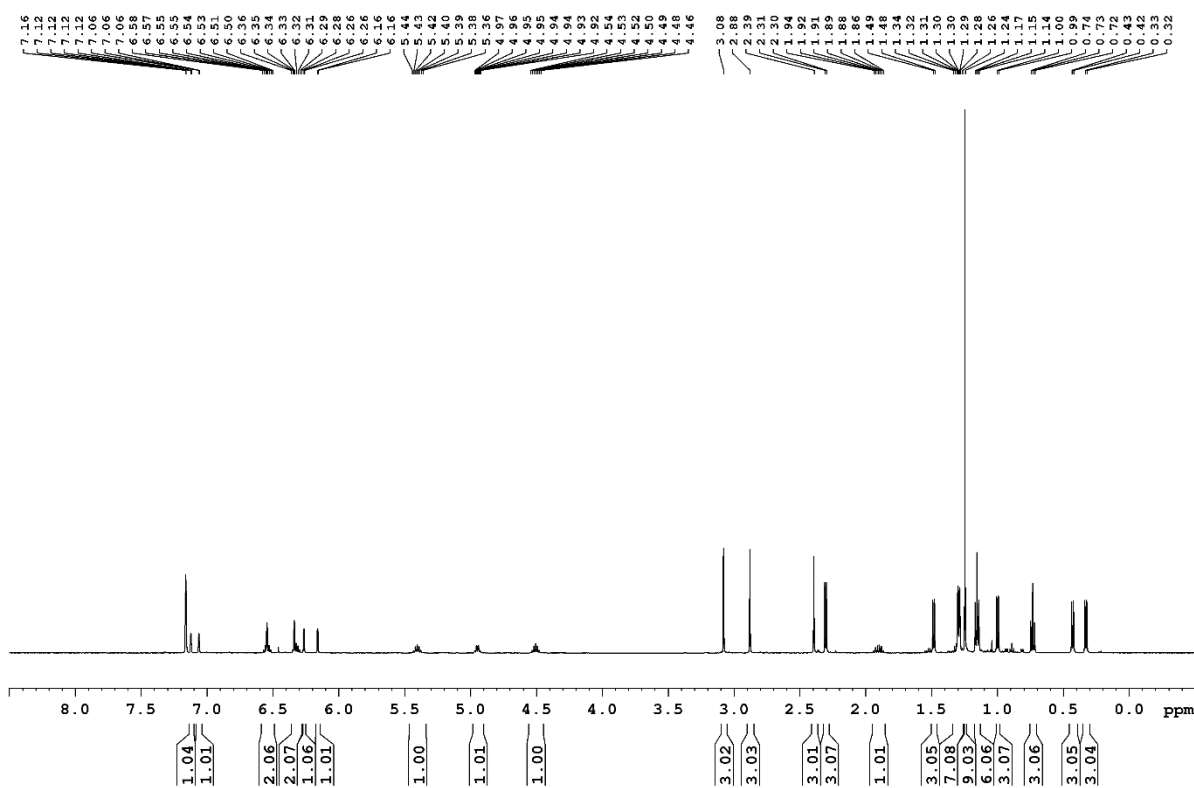

Figure S104.  $^1\text{H}$  NMR (500.1 MHz,  $\text{C}_6\text{D}_6$ , 298 K) spectrum of  $4\mathbf{e}^{i\text{Pr}}$ .

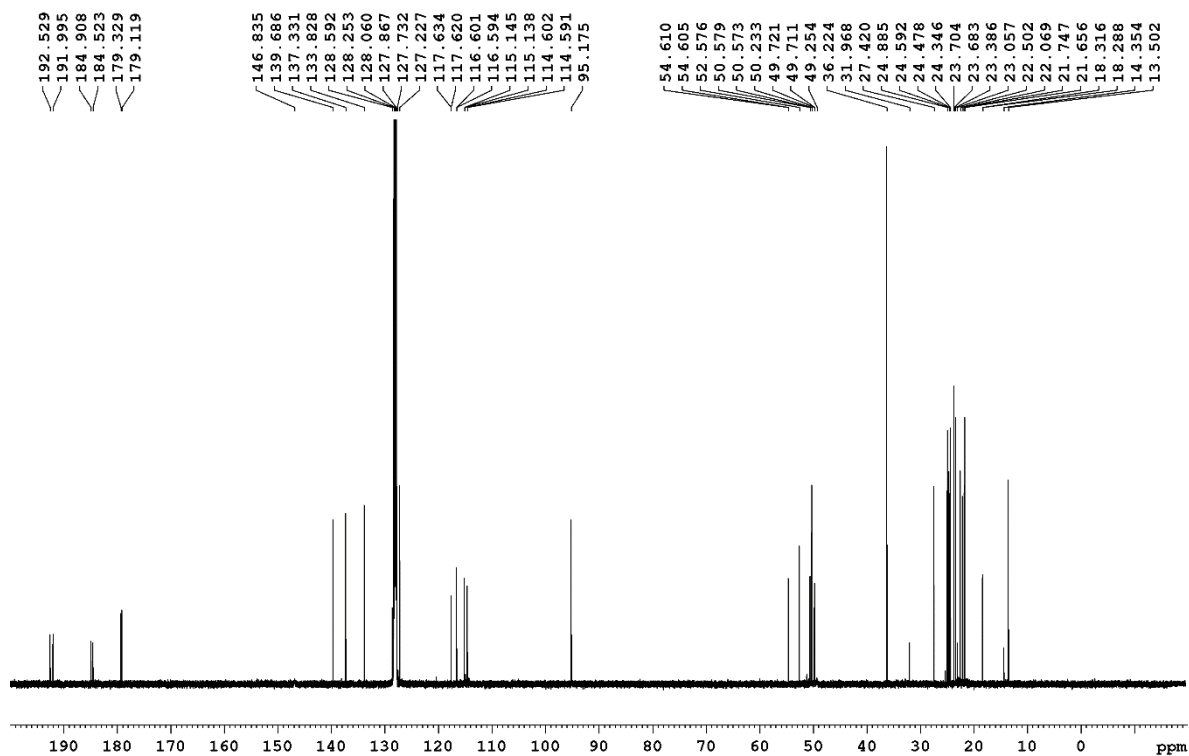

Figure S105.  $^{13}\text{C}\{^1\text{H}\}$  NMR (125.8 MHz,  $\text{C}_6\text{D}_6$ , 298 K) spectrum of  $4e^{i\text{Pr}}$ .

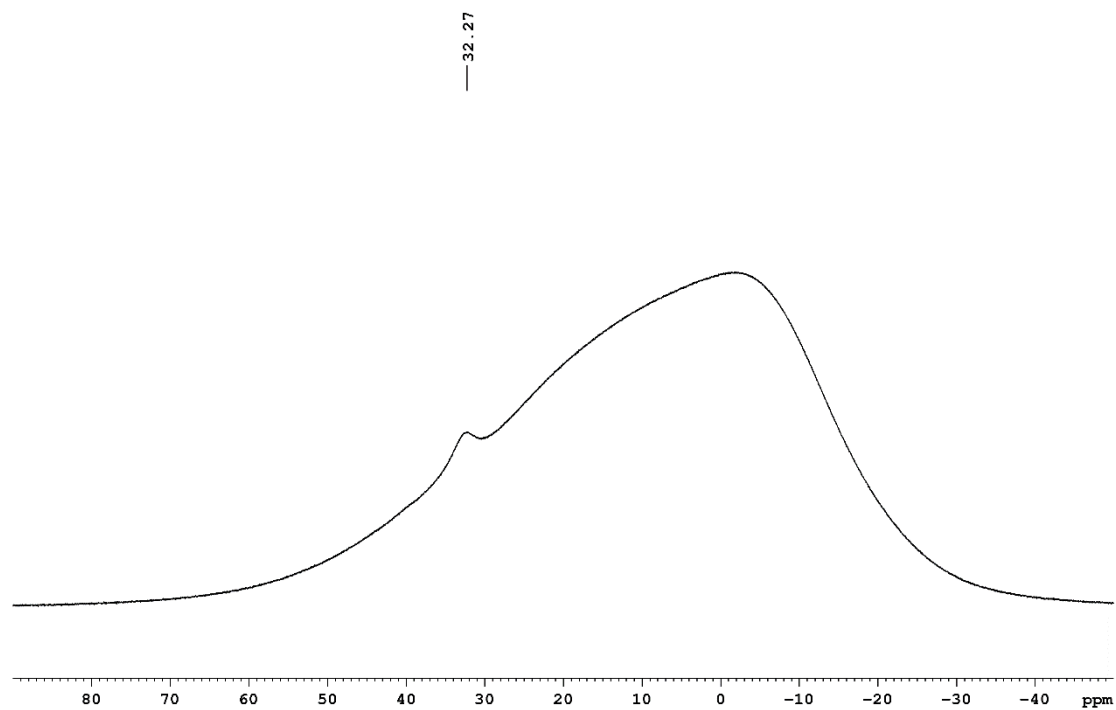

Figure S106.  $^{11}\text{B}$  NMR (160.5 MHz,  $\text{C}_6\text{D}_6$ , 298 K) spectrum of  $4e^{i\text{Pr}}$ .

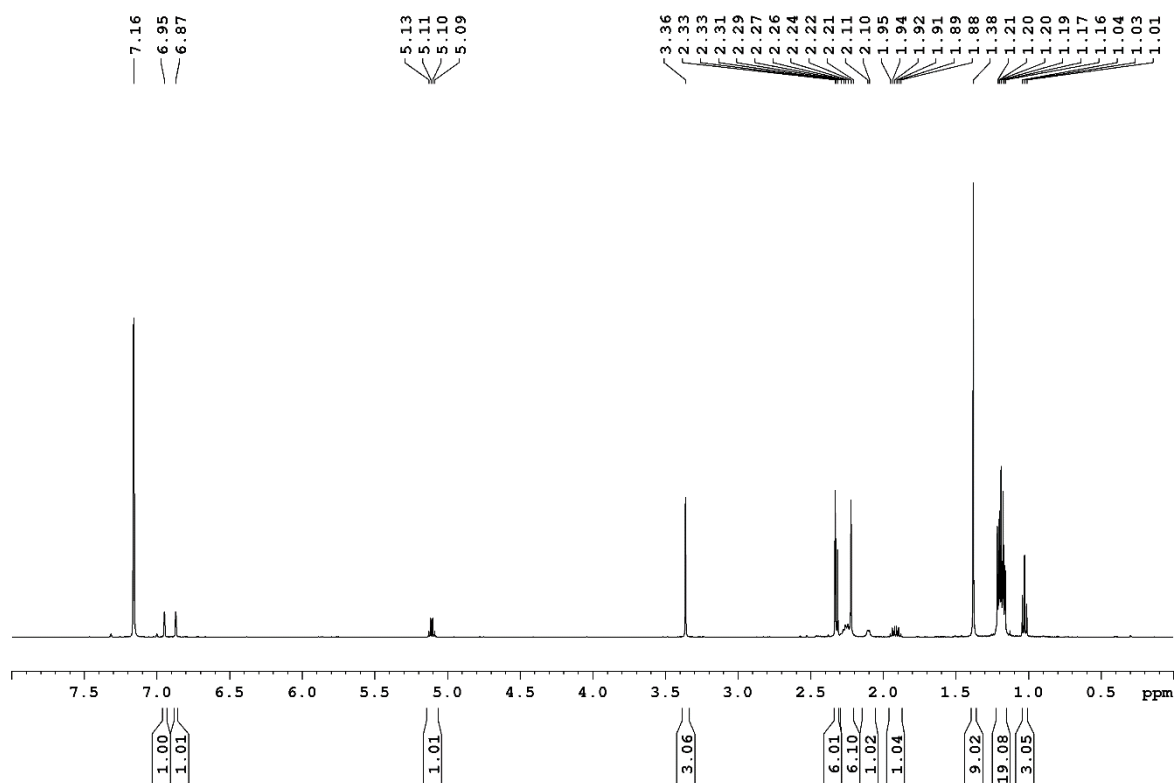

Figure S107.  $^1\text{H}$  NMR (500.1 MHz,  $\text{C}_6\text{D}_6$ , 298 K) spectrum of **5**.

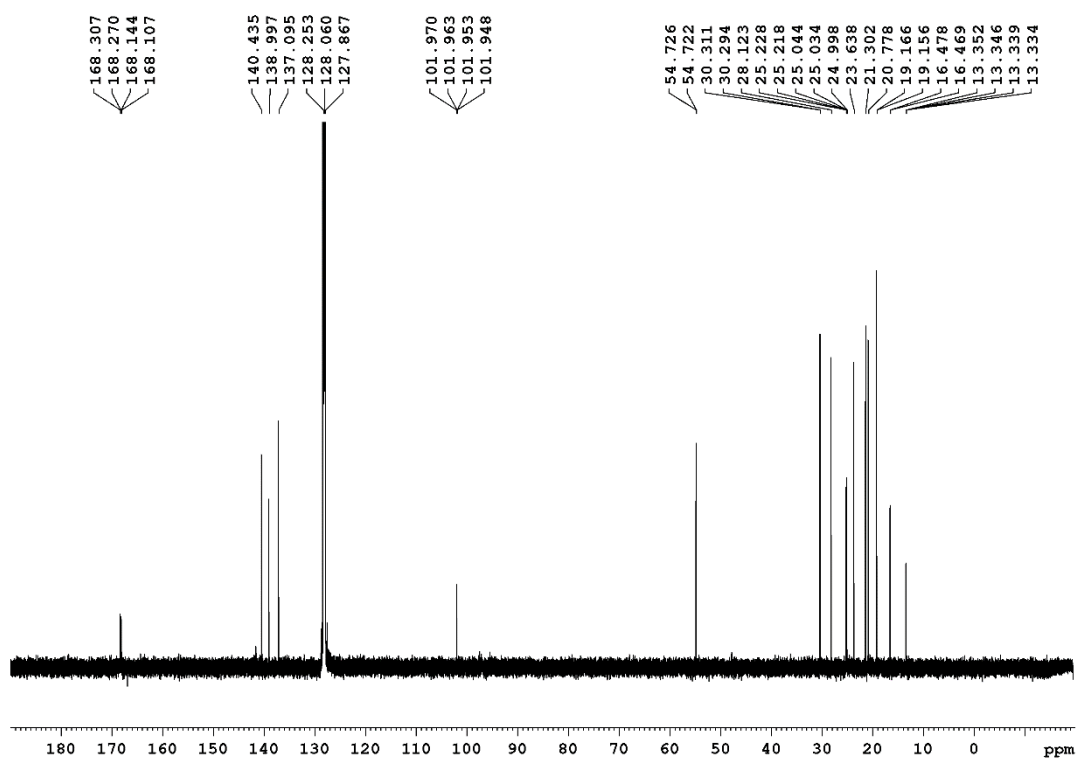

Figure S108.  $^{13}\text{C}\{^1\text{H}\}$  NMR (125.8 MHz,  $\text{C}_6\text{D}_6$ , 298 K) spectrum of **5**.

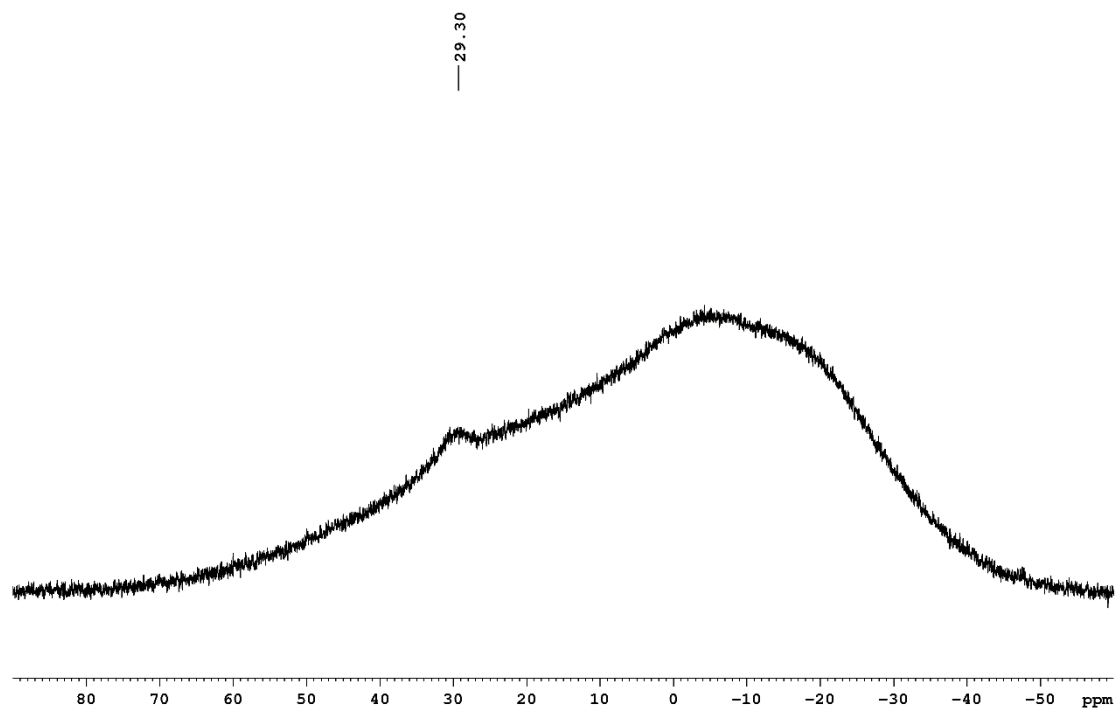

**Figure S109.**  $^{11}\text{B}$  NMR (128.5 MHz,  $\text{C}_6\text{D}_6$ , 298 K) spectrum of **5**.

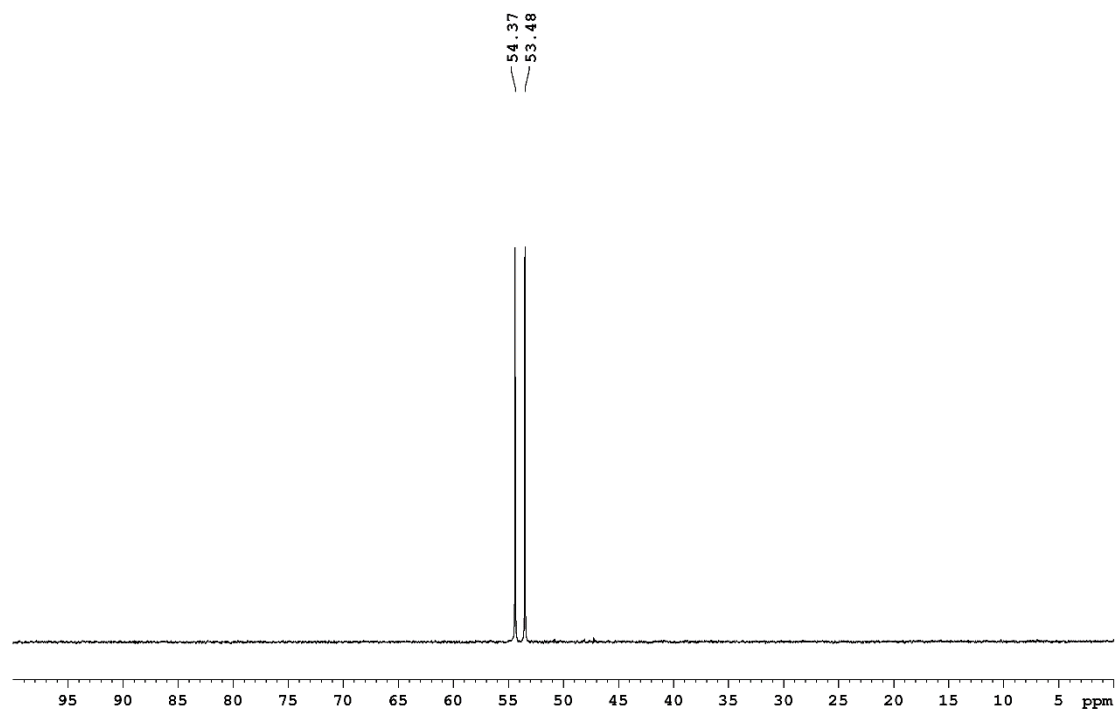

**Figure S110.**  $^{31}\text{P}\{^1\text{H}\}$  NMR (202.5 MHz,  $\text{C}_6\text{D}_6$ , 298 K) spectrum of **5**.



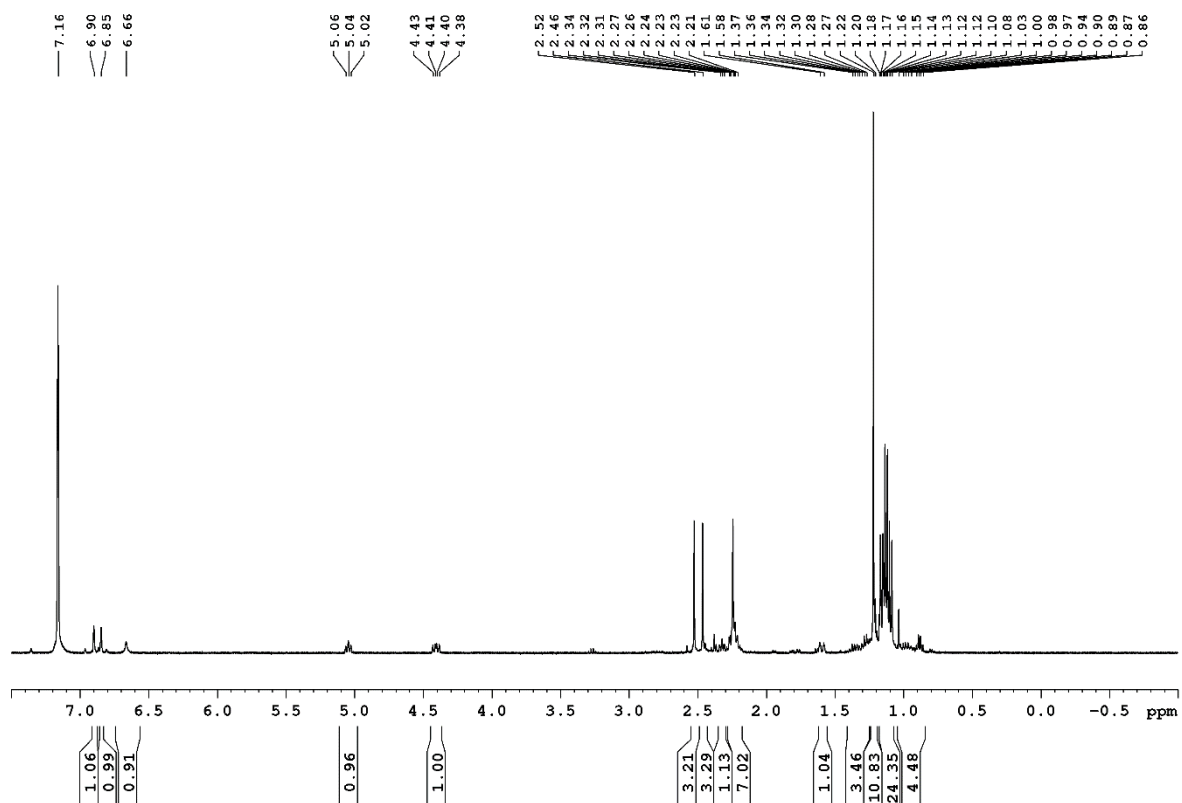

**Figure S111.**  $^1\text{H}$  NMR (400.6 MHz,  $\text{C}_6\text{D}_6$ , 298 K) spectrum of **7** with impurities.

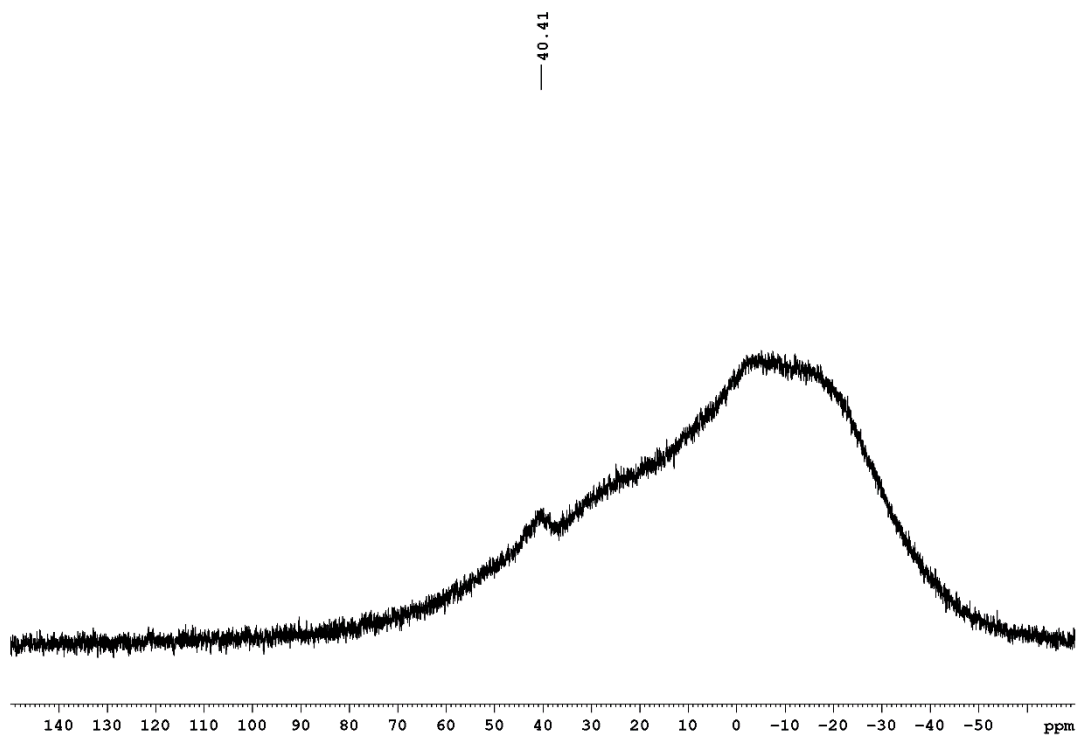

**Figure S 112.**  $^{11}\text{B}$  NMR (128.5 MHz,  $\text{C}_6\text{D}_6$ , 298 K) spectrum of **7**.

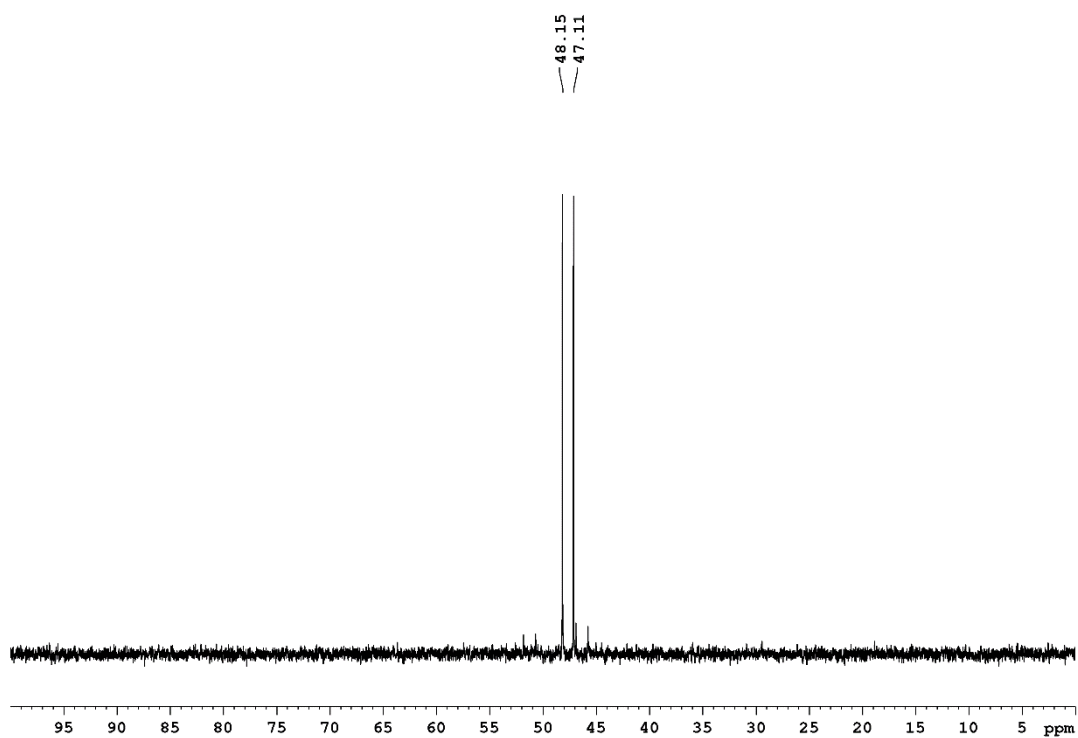

**Figure S113.**  $^{31}\text{P}\{^1\text{H}\}$  NMR (162.2 MHz,  $\text{C}_6\text{D}_6$ , 298 K) spectrum of **7**.

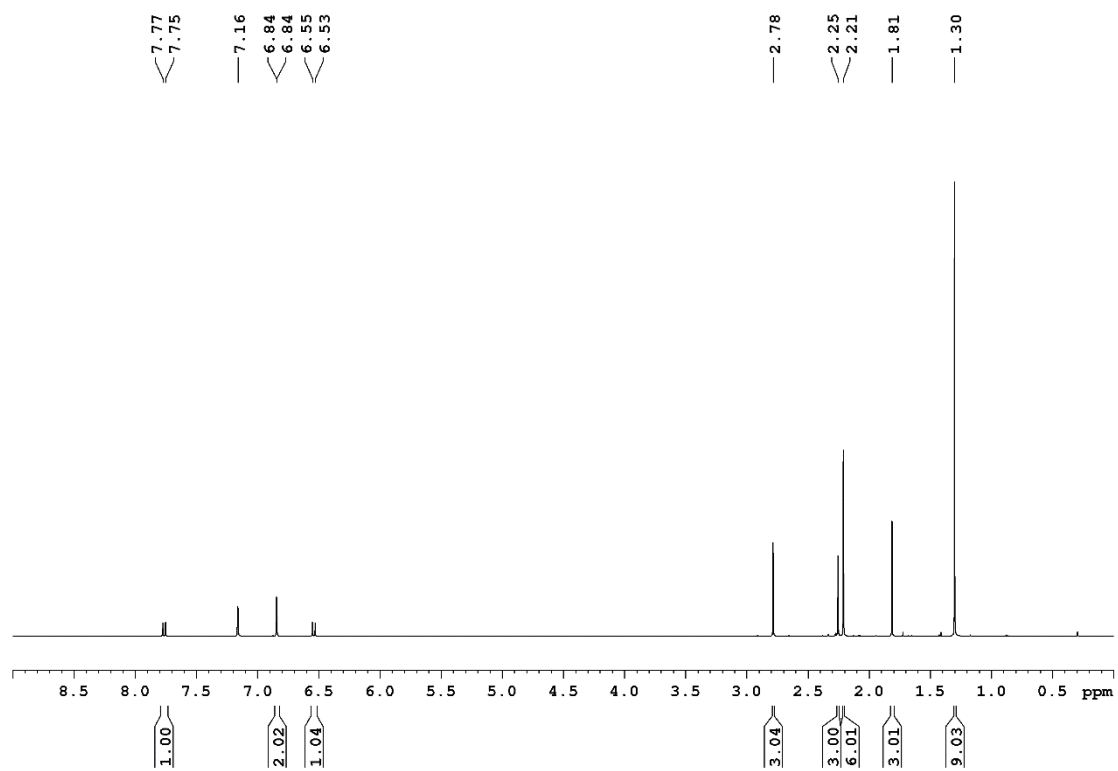

**Figure S114.**  $^1\text{H}$  NMR (500.1 MHz,  $\text{C}_6\text{D}_6$ , 298 K) spectrum of **I**.

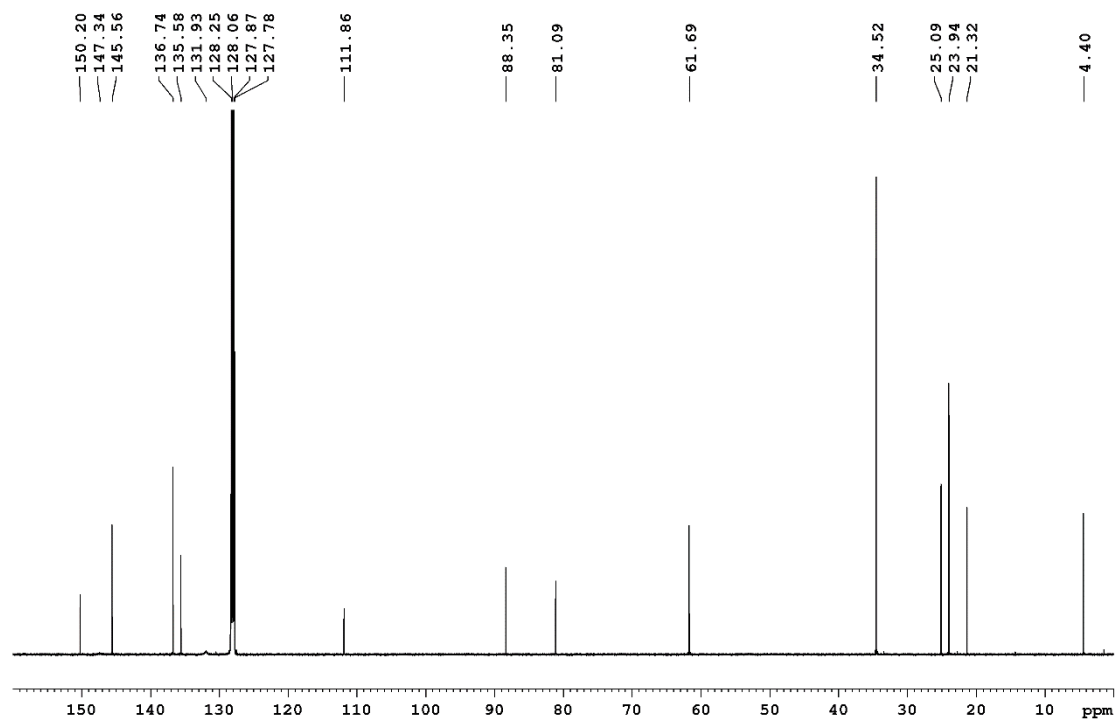

**Figure S115.**  $^{13}\text{C}\{^1\text{H}\}$  NMR (125.8 MHz,  $\text{C}_6\text{D}_6$ , 298 K) spectrum of **I**.

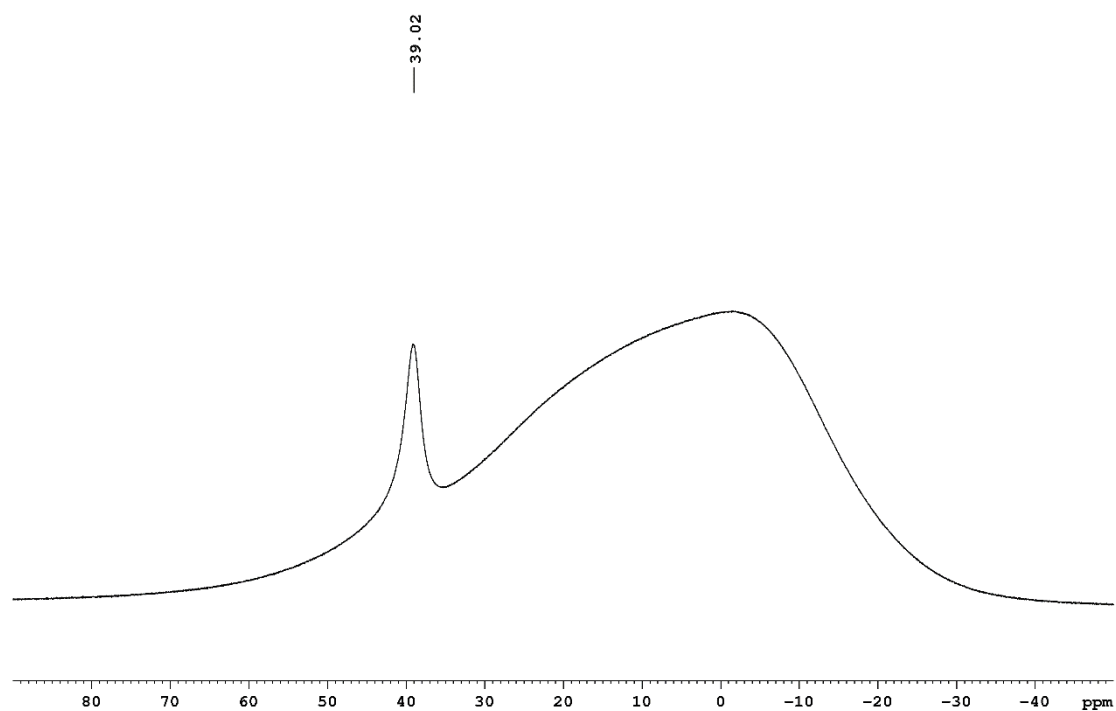

**Figure S116.**  $^{11}\text{B}$  NMR (160.5 MHz,  $\text{C}_6\text{D}_6$ , 298 K) spectrum of **I**.

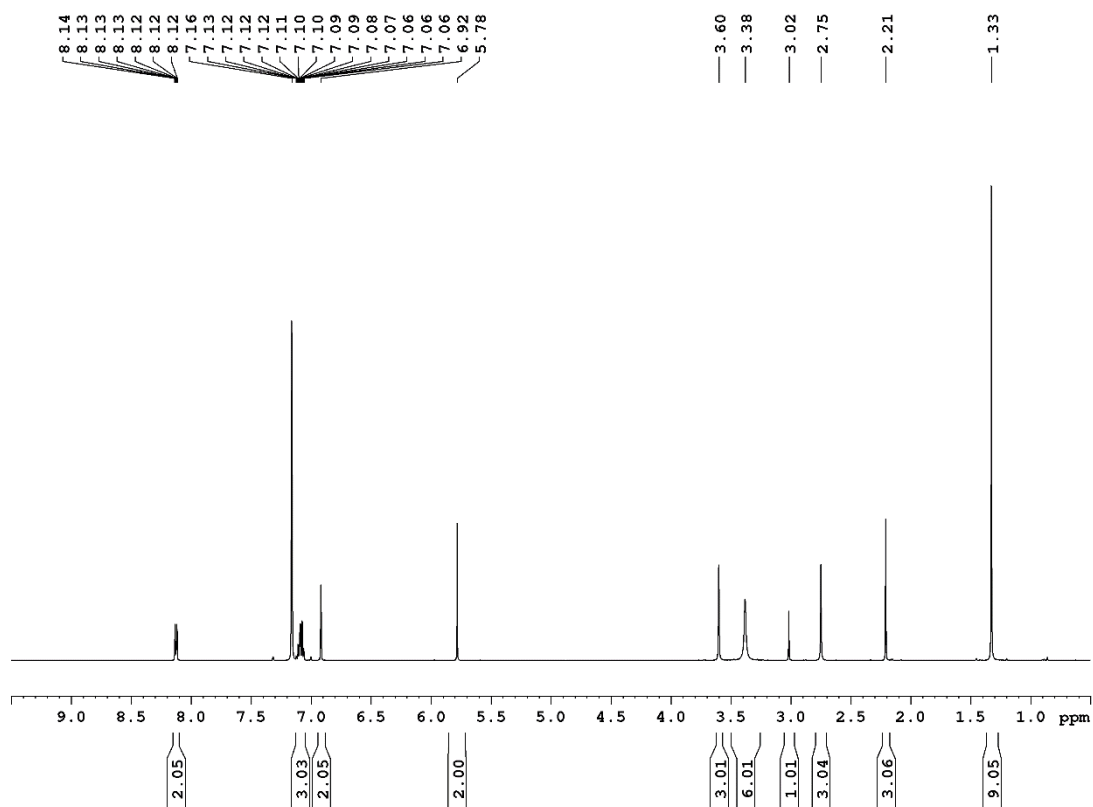

Figure S117.  $^1\text{H}$  NMR (500.1 MHz,  $\text{C}_6\text{D}_6$ , 298 K) spectrum of **II**.

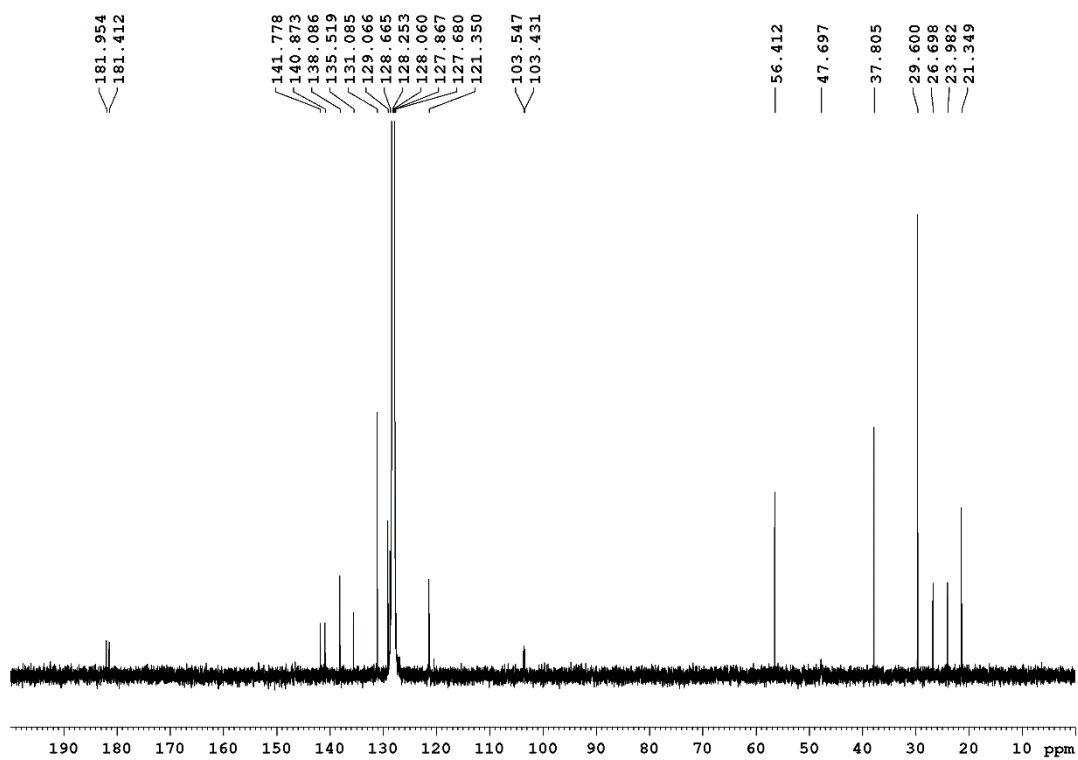

Figure S118.  $^{13}\text{C}\{^1\text{H}\}$  NMR (125.8 MHz,  $\text{C}_6\text{D}_6$ , 298 K) spectrum of **II**.

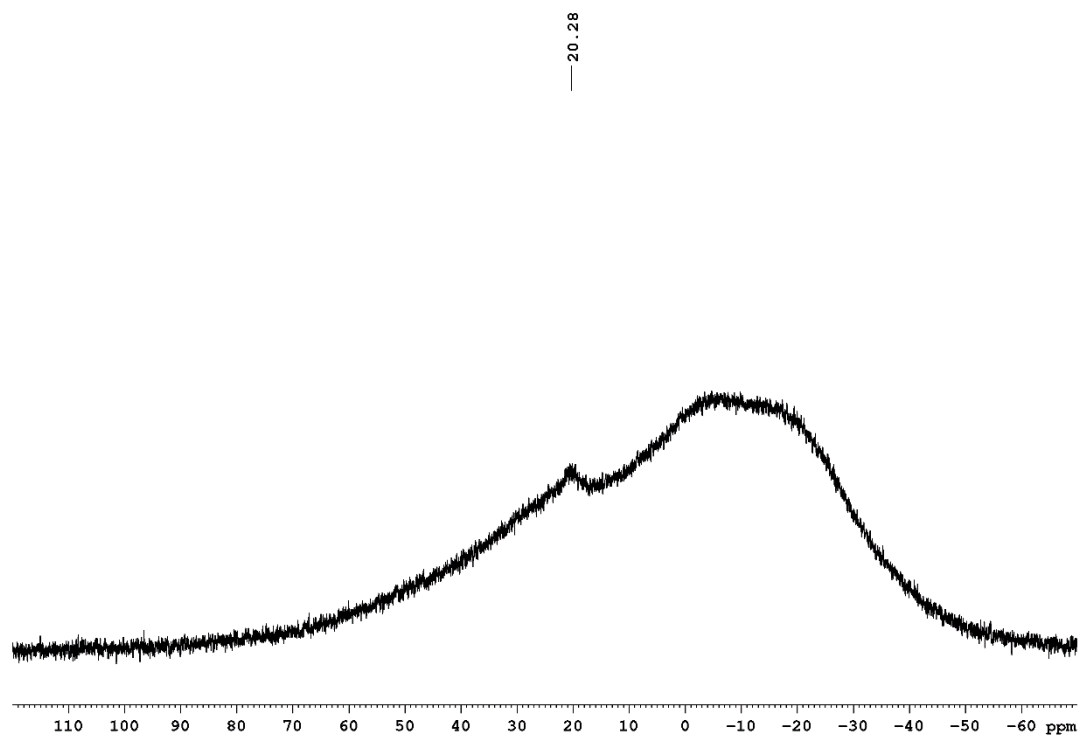

**Figure S119.**  $^{11}\text{B}$  NMR (128.5 MHz,  $\text{C}_6\text{D}_6$ , 298 K) spectrum of **II**.

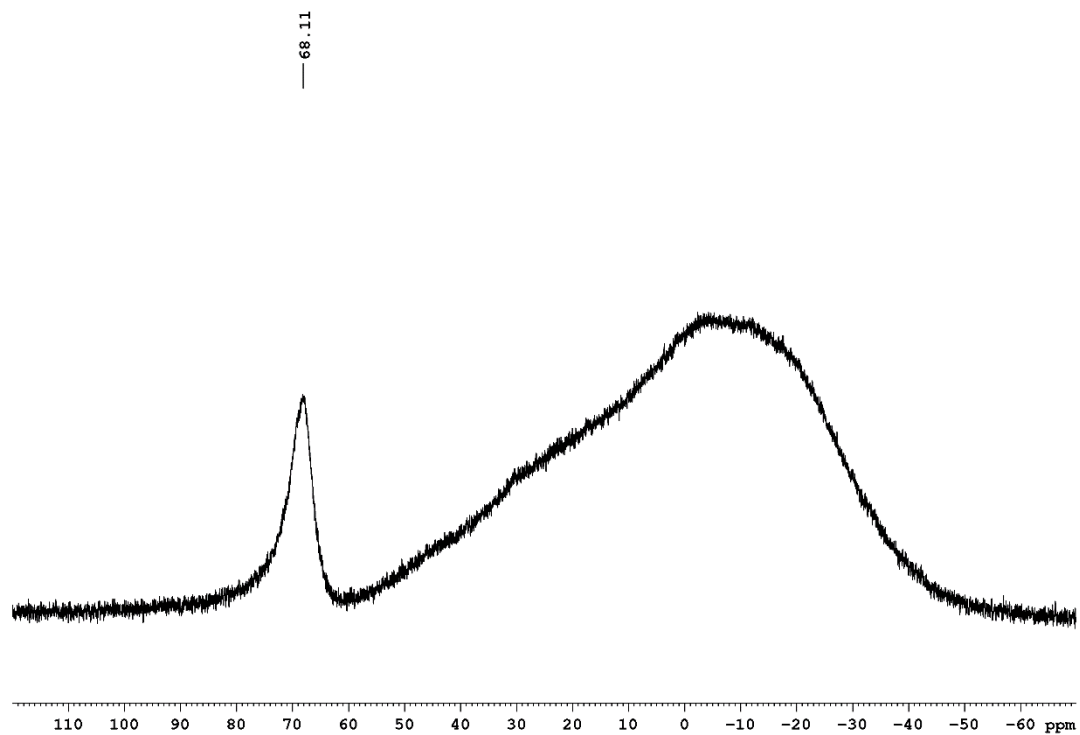

**Figure S120.**  $^{11}\text{B}$  NMR (128.5 MHz,  $\text{C}_6\text{D}_6$ , 298 K) spectrum of the reaction of **1a** with  $\text{PEt}_3$ .

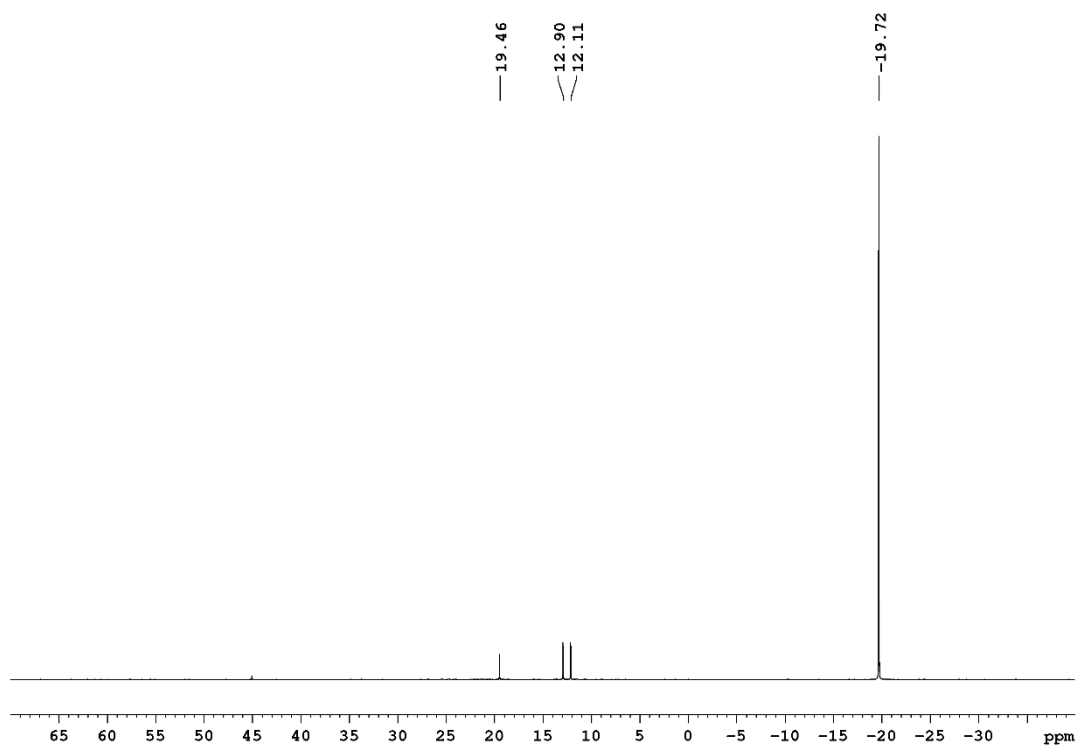

**Figure S121.**  $^{31}\text{P}\{^1\text{H}\}$  NMR (162.2 MHz,  $\text{C}_6\text{D}_6$ , 298 K) spectrum of the reaction of **1a** with  $\text{PEt}_3$ .

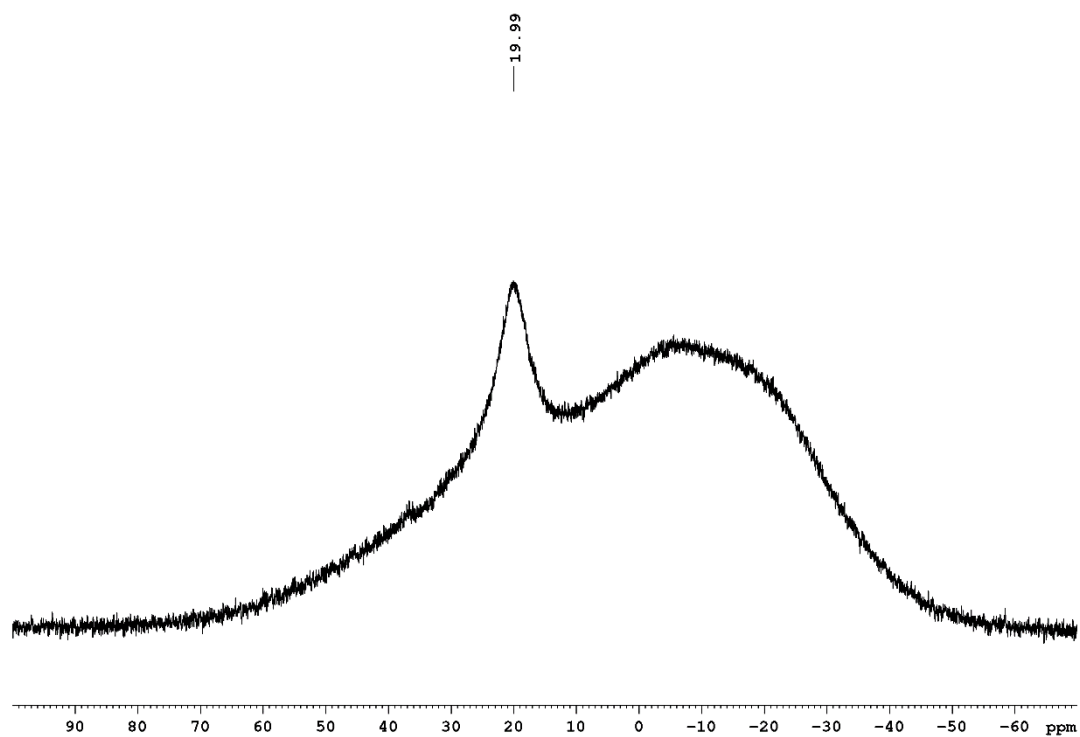

**Figure S122.**  $^{11}\text{B}$  NMR (128.5 MHz, toluene, 298 K) spectrum of the reaction of **1a** with  $\text{PCy}_3$ .

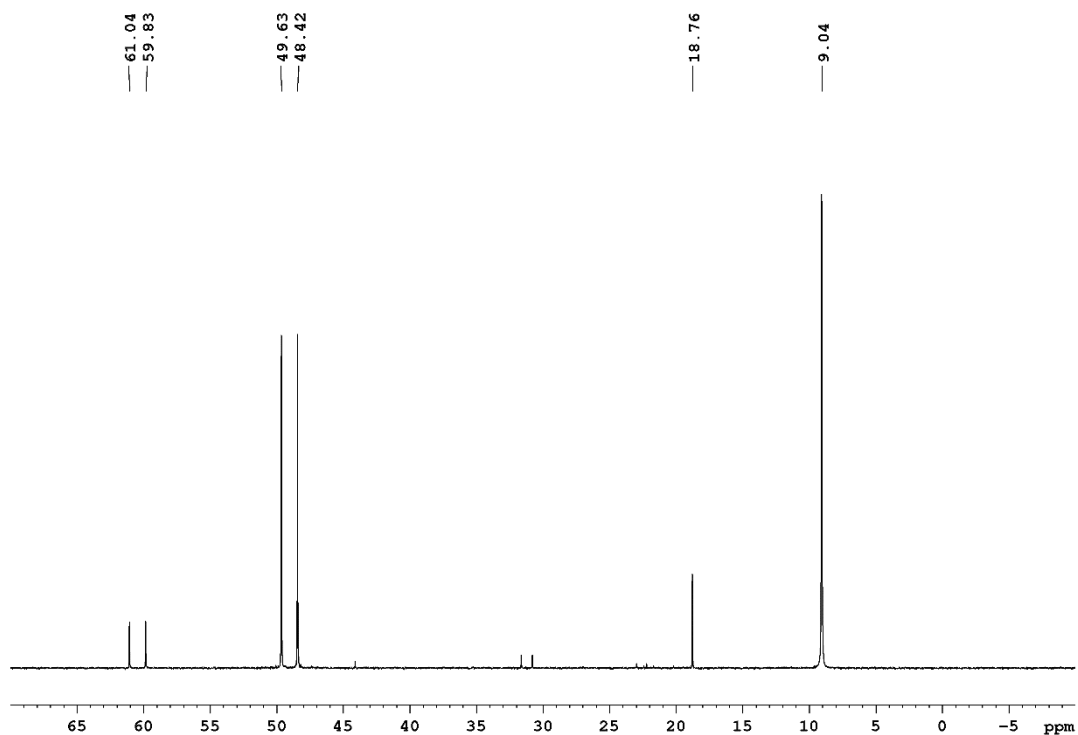

**Figure S123.**  $^{31}\text{P}\{^1\text{H}\}$  NMR (162.2 MHz, toluene, 298 K) spectrum of the reaction of **1a** with  $\text{PCy}_3$ .

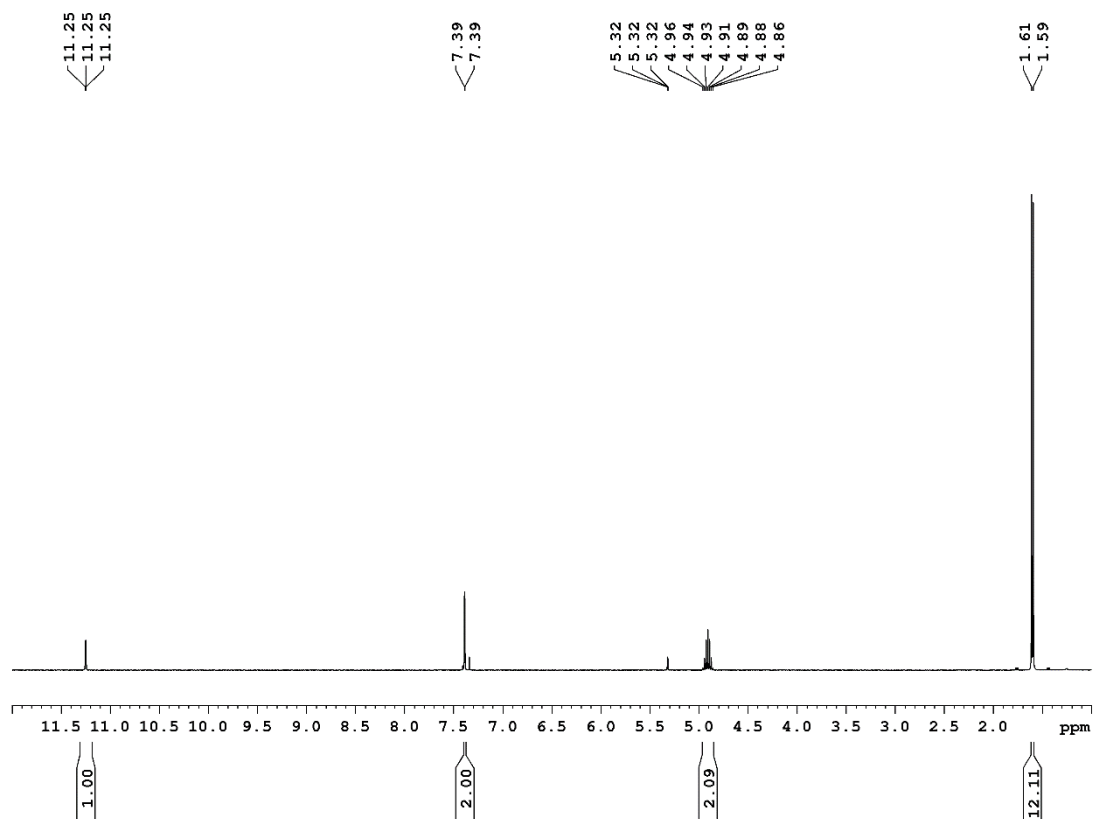

**Figure S124.**  $^1\text{H}$  NMR (400.1 MHz,  $\text{CD}_2\text{Cl}_2$ , 298 K) spectrum of 1,3-diisopropylimidazolium chloride.

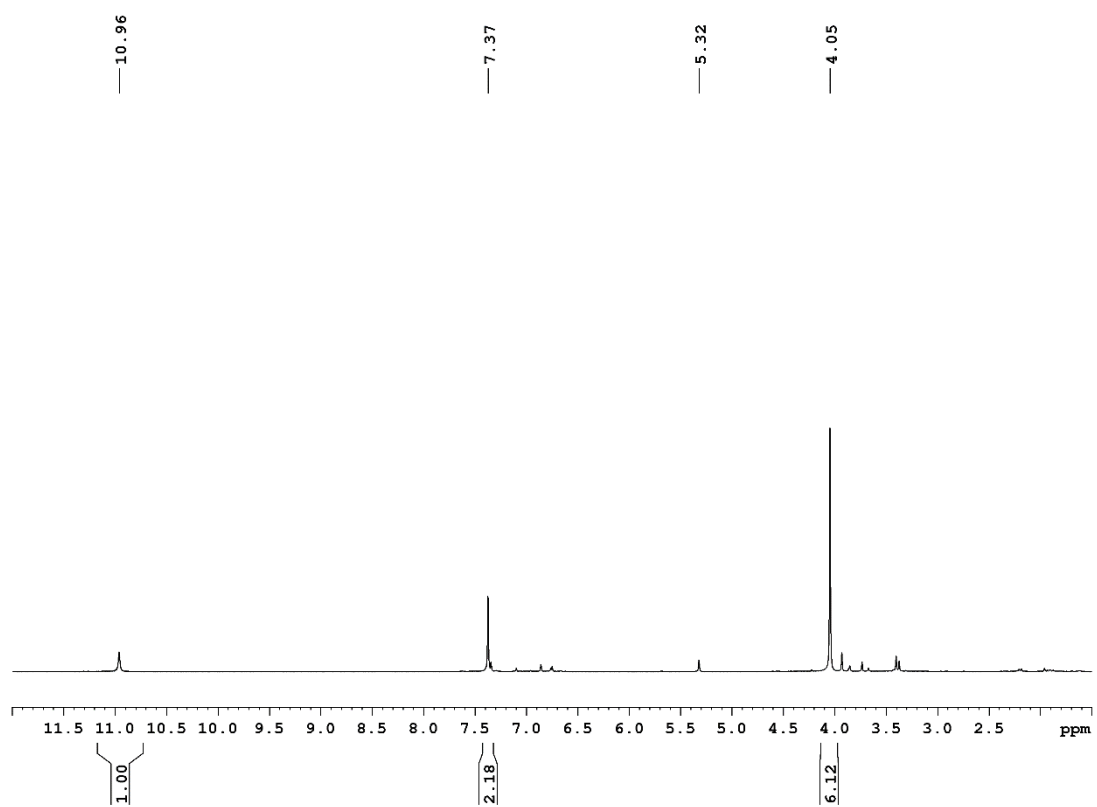

**Figure S125.**  $^1\text{H}$  NMR (400.3 MHz,  $\text{CD}_2\text{Cl}_2$ , 298 K) spectrum of 1,3-dimethylimidazolium chloride.



## UV-Vis spectra

The UV-vis absorption spectra of **1a**, **1c**, **1d**, **1e**, **1f**, **1g**, **1h**, **1i**, **1j**, **1k**, **1l**, **2a**, **2b**, **2c**, **2d**, **2e**, **2f**, **2g**, **2l** and **3a<sup>Me</sup>** were measured on a JASCO V-660 UV-vis spectrometer. The UV-vis absorption spectra of **4a<sup>iPr</sup>** and **4e<sup>iPr</sup>** were measured on a METTLER TOLEDO UV-vis Excellence UV5 spectrophotometer.

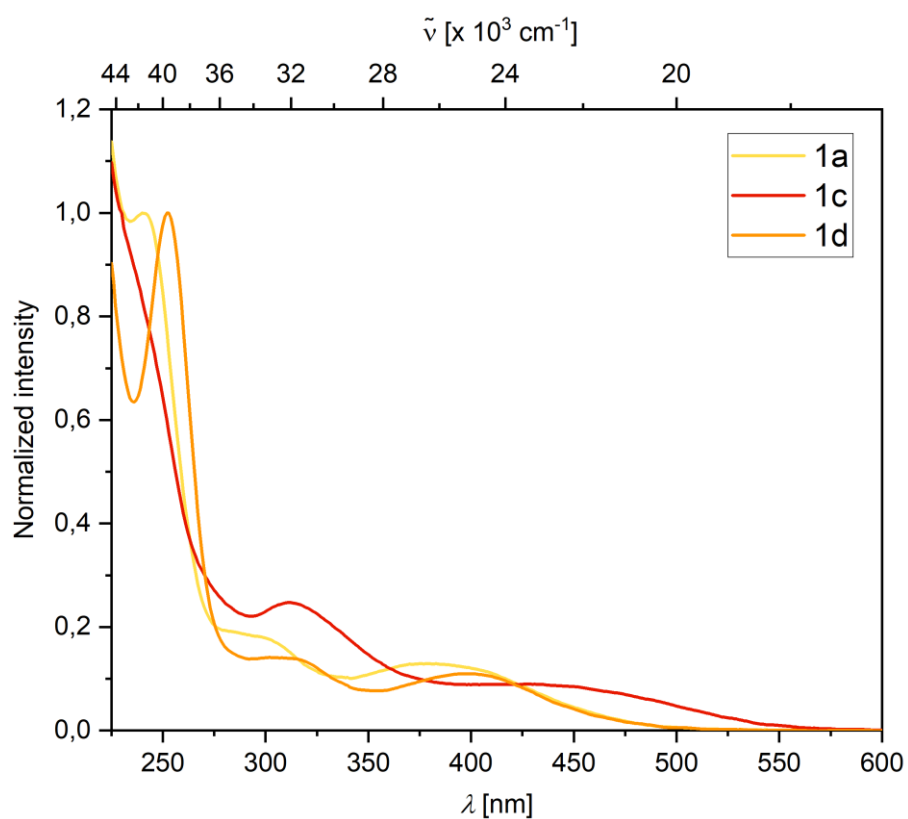

**Figure S126.** UV-vis absorption spectra of **1a**, **1c** and **1d** in hexane.

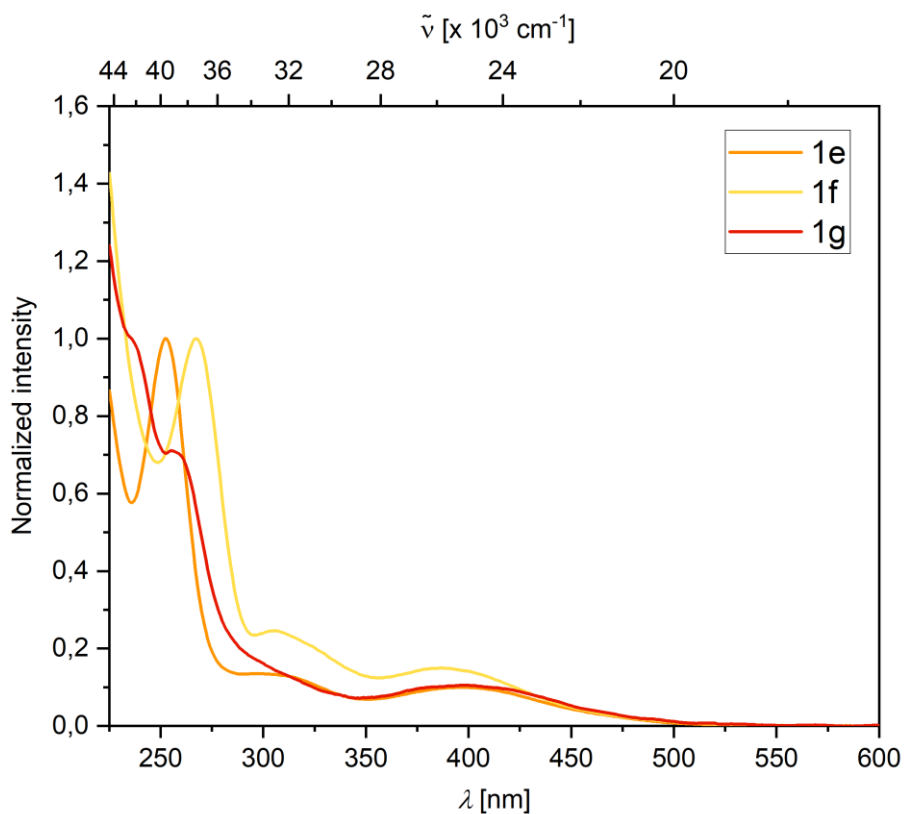

**Figure S127.** UV-vis absorption spectra of **1e**, **1f** and **1g** in hexane.

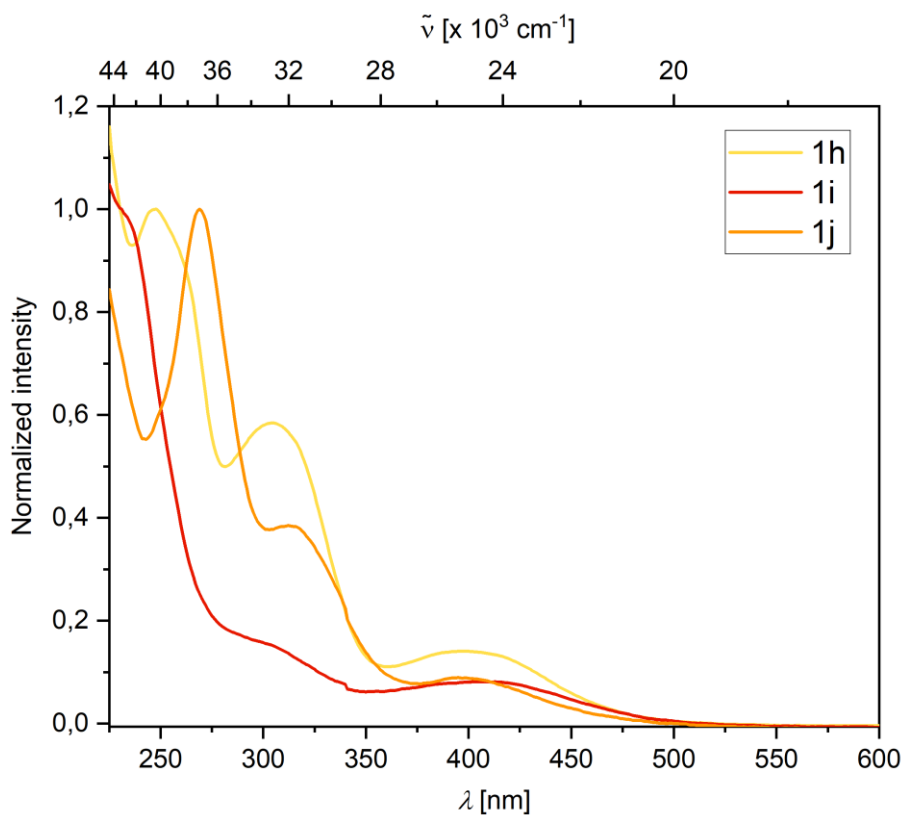

**Figure S128.** UV-vis absorption spectra of **1h**, **1i** and **1j** in hexane.

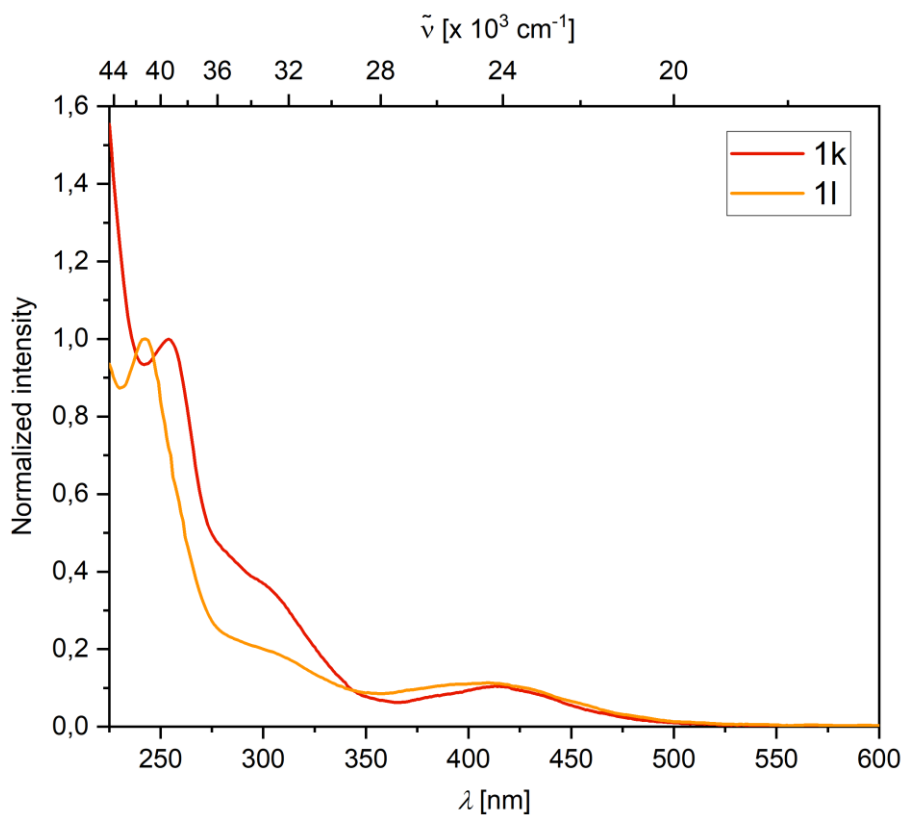

**Figure S129.** UV-vis absorption spectra of **1k** in hexane and of **1l** in THF.

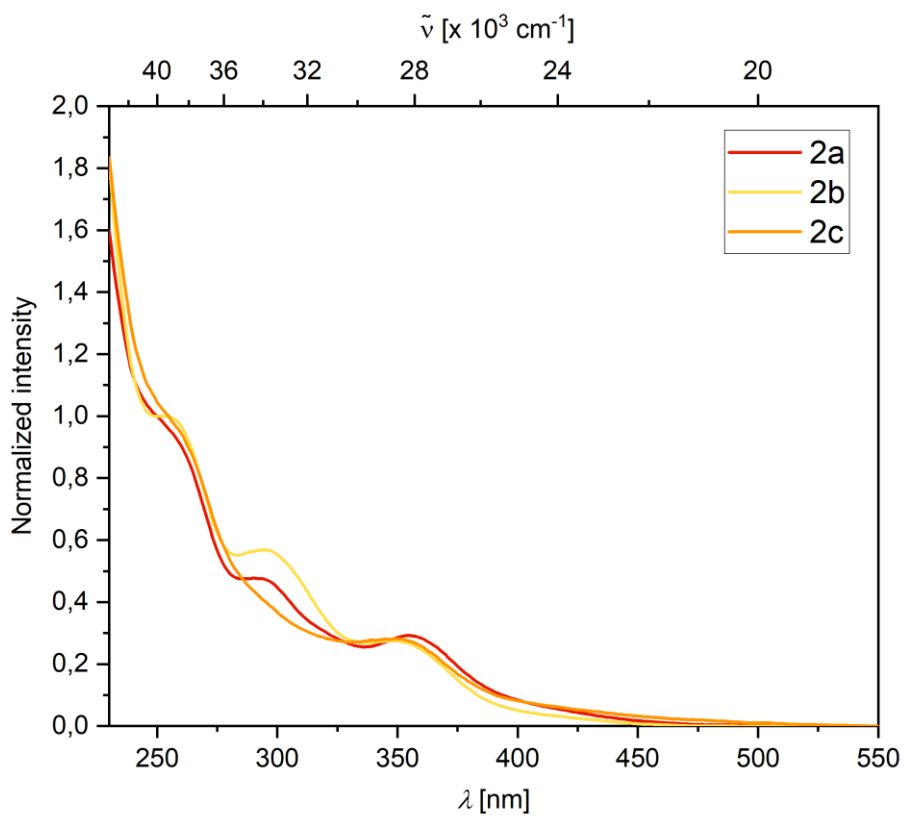

**Figure S130.** UV-vis absorption spectra of **2a** and **2b** in hexane and of **2c** in THF.

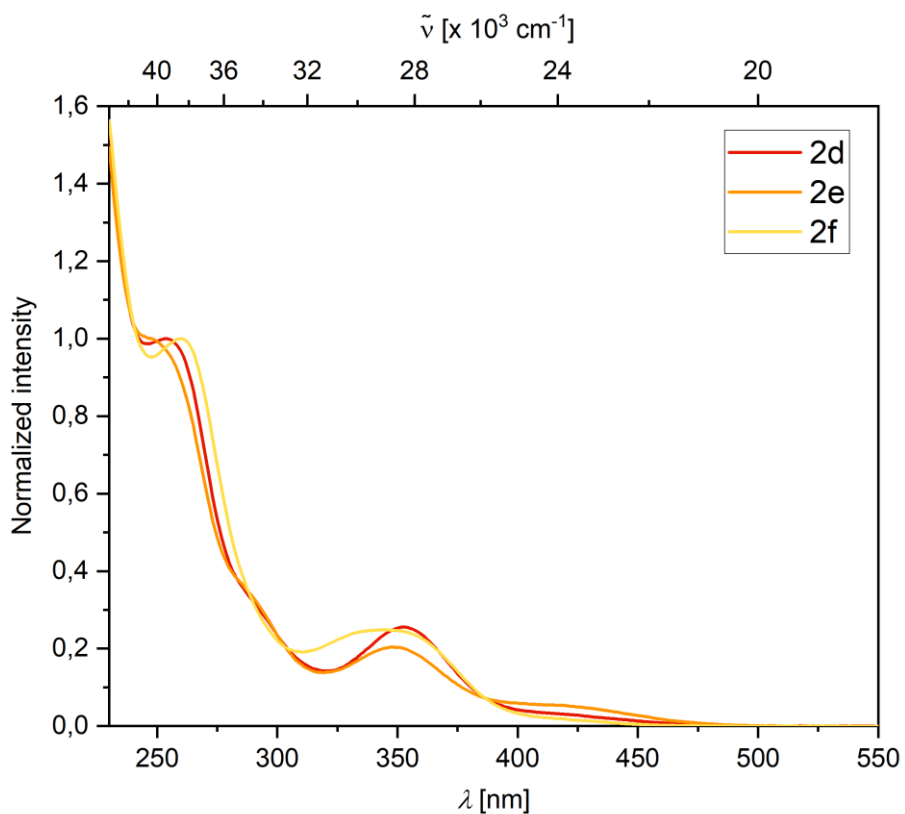

**Figure S 131.** UV-vis absorption spectra of **2d**, **2e** and **2f** in hexane.

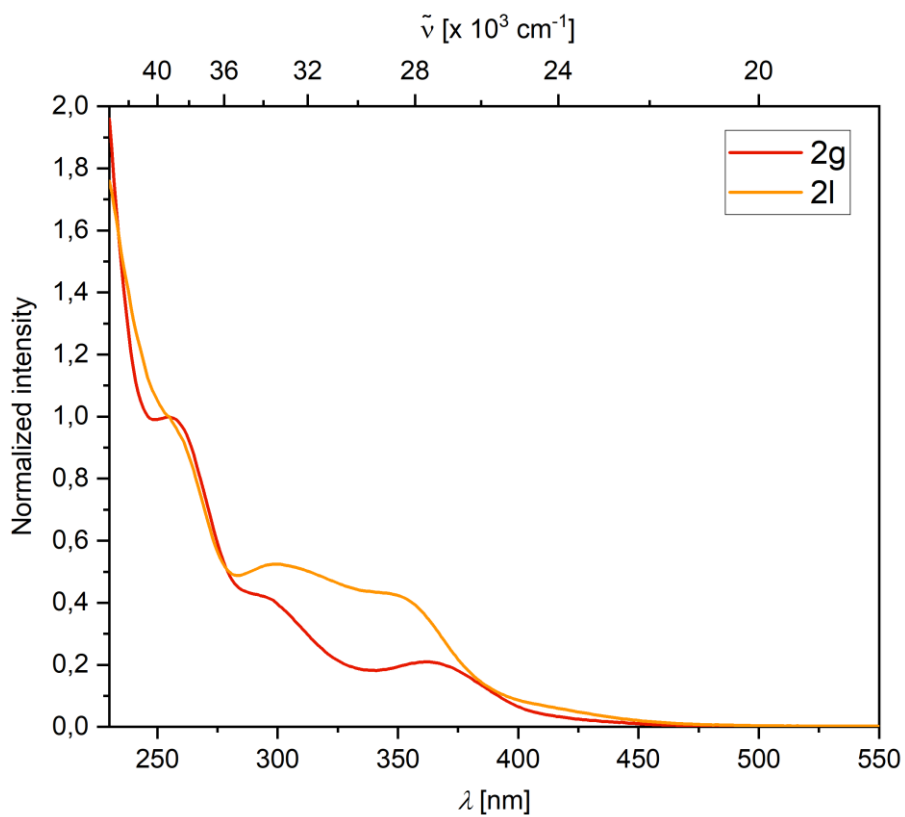

**Figure S132.** UV-vis absorption spectra of **2g** in hexane and of **2l** in THF.

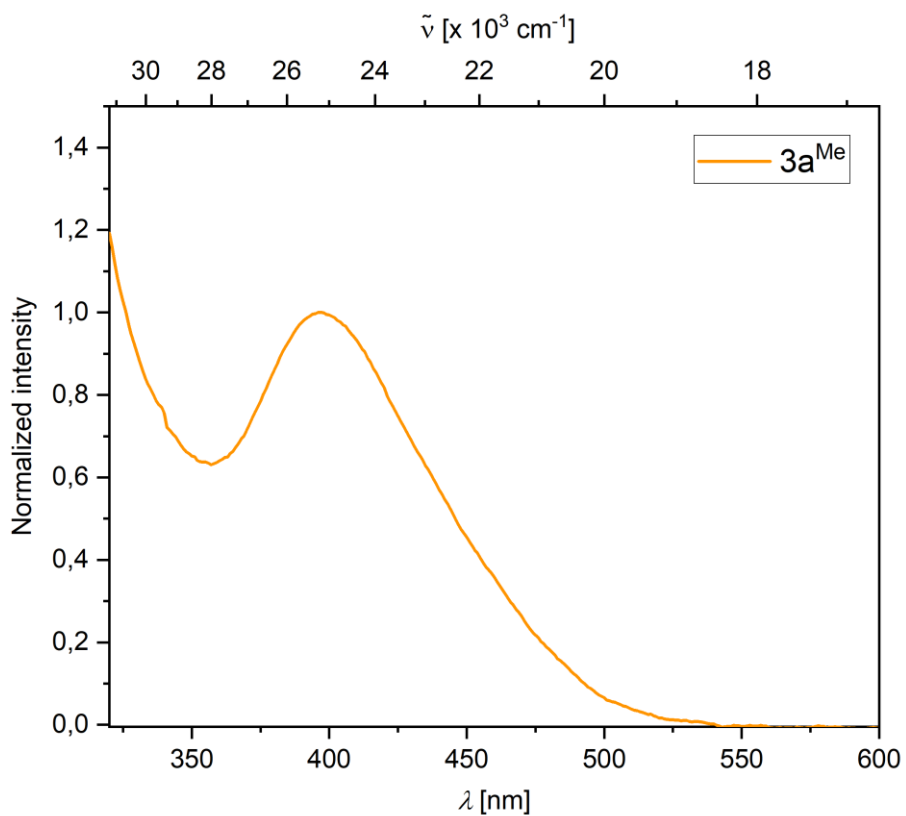

**Figure S133.** UV-vis absorption spectrum of  $3a^{Me}$  in THF.

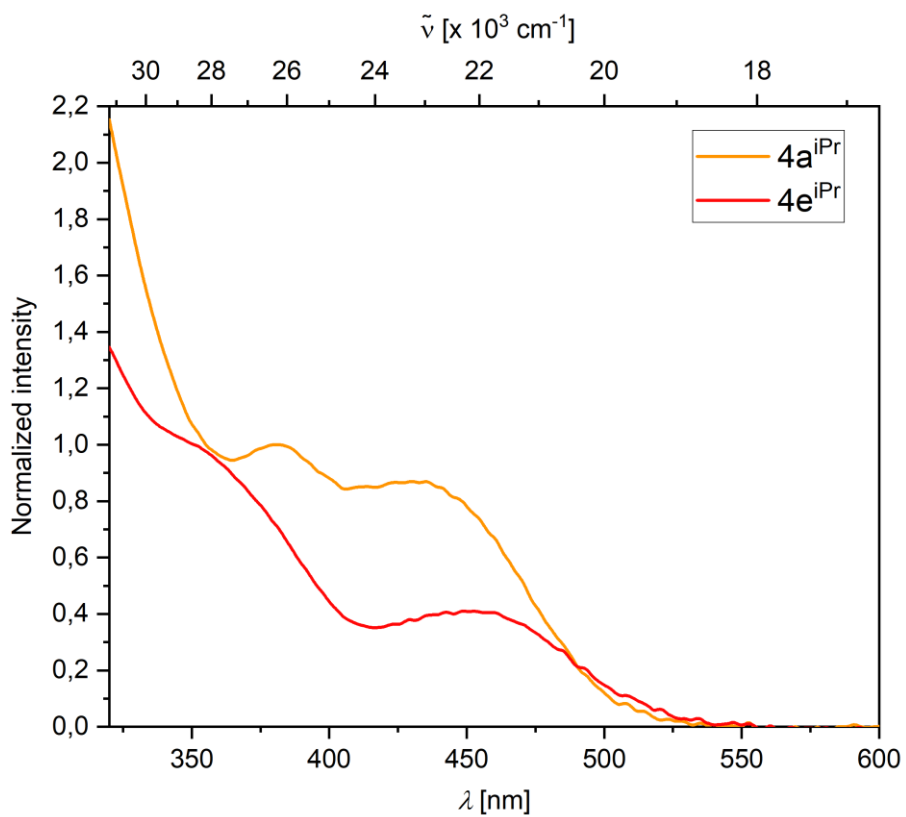

**Figure S134.** UV-vis absorption spectra of  $4a^{iPr}$  and  $4e^{iPr}$  in THF.

## Crystal structure determination

The crystal data of **1c**, **1d**, **1g**, **1h**, **1i**, **1j**, **1k**, **2b**, **2c**, **2e**, **2f**, **2g**, **2l**, **3a<sup>iPr</sup>**, **3e<sup>Me</sup>**, **4a<sup>iPr</sup>**, **4e<sup>iPr</sup>**, **5**, **6**, **7** and **I (Ia)** were collected on a BRUKER D8 QUEST diffractometer with a CMOS area detector and multi-layer mirror monochromated MoK $\alpha$  radiation. The crystal data of **1a**, **1e**, **1f**, **1l**, **2a**, **2d**, **3a<sup>Me</sup>** and **I(Ib)** were collected on a BRUKER X8-APEX II diffractometer with a CCD area detector and multi-layer mirror monochromated MoK $\alpha$  radiation. The structures were solved using the intrinsic phasing method,<sup>11</sup> refined with the SHELXL program<sup>12</sup> and expanded using Fourier techniques. All non-hydrogen atoms were refined anisotropically. Hydrogen atoms were included in structure factor calculations. All hydrogen atoms were assigned to idealized geometric positions unless otherwise stated.

Crystallographic data have been deposited with the Cambridge Crystallographic Data Center as supplementary publication no. CCDC 1997139-1997165, 1997341 and 2012450. These data can be obtained free of charge from The Cambridge Crystallographic Data Centre *via* [www.ccdc.cam.ac.uk/data\\_request/cif](http://www.ccdc.cam.ac.uk/data_request/cif)

The hydrogen atoms of the azaborete four-membered ring system CH moieties of the compounds **1a**, **1c**, **1h**, **1i** and **1l** were refined with different refinement options (HFIX 43, HFIX 13 and freely refined). The different options showed no significant variations (less than double the standard deviations) concerning the bond distances and angles of the corresponding CH carbon atom to the surrounding heavier atoms (heavier than H). These hydrogen atoms were refined using the HFIX 13 command.

The hydrogen atoms of the allene CH moieties of the compounds **3a<sup>Me</sup>**, **3a<sup>iPr</sup>**, **3e<sup>Me</sup>** and **4a<sup>iPr</sup>** were refined with different refinement options (HFIX 43, HFIX 13 and freely refined). The different options showed no significant differences (less than the standard deviations) among each other concerning the bond distances and angles of the corresponding CH carbon atom to the surrounding heavier atoms (heavier than H). These hydrogen atoms were refined using the HFIX 43 command.

**Refinement details for 1d:** The two most disagreeable reflections were omitted.

**Refinement details for 1e:** The structure was refined using the TWIN keyword. The BASF parameter was refined to 46.9%.

**Refinement details for 1g:** The most disagreeable reflection was omitted. The displacement parameters of atoms B1\_1 and B1\_10 of the residues RESI 1 and RESI 10 were constrained to the same value with the EADP keyword. The displacement parameters of atoms B1\_1 > C6\_10 of the residues RESI 1 and RESI 10 were restrained to the same value with the similarity restraint SIMU. The Uii displacement parameters of atoms B1\_1 > C6\_10 of the residues RESI 1 and RESI 10 were restrained with the ISOR keyword to approximate isotropic behavior. The atomic displacement parameters of atoms B1\_1 > C6\_10 were restrained with the RIGU keyword in the ShelXL input ('enhanced rigid bond' restraint for all bonds in the connectivity list. A standard value of 0.003 was used). The 1-2 and 1-3 distances in the residues RESI 1 and RESI 10 were restrained to the same values with the SAME keyword.

**Refinement details for 1h:** The most disagreeable reflection was omitted.

**Refinement details for 1i:** The most disagreeable reflection was omitted.

**Refinement details for 2d:** The displacement parameters of atoms C1\_1 > C4\_10 of the residues RESI 1 and RESI 10 were restrained to the same value with the similarity restraint SIMU. The Uii displacement parameters of atoms C1\_1 > C4\_10 were restrained with the ISOR keyword to approximate isotropic behavior. The atomic displacement parameters of atoms C1\_1 > C4\_10 were restrained with the RIGU keyword in the ShelXL input ('enhanced rigid bond' restraint for all bonds in the connectivity list. Standard values of 0.002 for both parameters s1 and s2 were used). The 1-2 and 1-3 distances in RESI 1 and RESI 10 residues were restrained to the same values with the SAME keyword. The BUMP command was used to avoid short intramolecular H-H contacts.

**Refinement details for 2f:** The most disagreeable reflection was omitted. The displacement parameters of atoms C1\_3 > C4\_10 of the residues RESI 1, RESI 3, RESI 4, RESI 5 and RESI 10 were restrained to the same value with the similarity restraint SIMU. The Uii displacement parameters of atoms C1\_3 > C4\_10 were restrained with the ISOR keyword to approximate isotropic behavior. The atomic displacement parameters of atoms C1\_3 > C4\_10 were restrained with the RIGU keyword in the ShelXL input ('enhanced rigid bond' restraint for all

bonds in the connectivity list. Standard values of 0.002 for both parameters  $s_1$  and  $s_2$  were used). The 1-2 and 1-3 distances in RESI 1 and RESI 10 residues were restrained to the same values with the SAME keyword.

**Refinement details for 2g:** The most disagreeable reflection was omitted.

**Refinement details for 2l:** The displacement parameters of atoms C1\_1 > C3\_2 of the residues RESI 1 and RESI 2 were restrained to the same value with the similarity restraint SIMU. The 1-2 and 1-3 distances in RESI 1 and RESI 2 residues were restrained to the same values with the SAME keyword.

**Refinement details for 3a<sup>iPr</sup>:** The most disagreeable reflection was omitted.

**Refinement details for 4a<sup>iPr</sup>:** The two most disagreeable reflections were omitted.

**Refinement details for 4e<sup>iPr</sup>:** The displacement parameters of atoms C1\_1 > C4\_10 of the residues RESI 1 and RESI 10 were restrained to the same value with the similarity restraint SIMU. The U<sub>ii</sub> displacement parameters of atoms C1\_1 > C4\_10 were restrained with the ISOR keyword to approximate isotropic behavior. The atomic displacement parameters of atoms C1\_1 > C4\_10 were restrained with the RIGU keyword in the ShelXL input ('enhanced rigid bond' restraint for all bonds in the connectivity list. Standard values of 0.004 for both parameters  $s_1$  and  $s_2$  were used).

**Refinement details for 5:** The most disagreeable reflection was omitted. All hydrogen atoms except H1 were assigned to idealized positions. The coordinates of H1 were refined freely.

**Refinement details for 6:** All hydrogen atoms except H2, H3 and H4 were assigned to idealized positions. The coordinates of H2, H3 and H4 were refined freely.

**Refinement details for 7:** All hydrogen atoms except H2, H4, H30 and H32 were assigned to idealized positions. The coordinates of H2, H4, H30 and H32 were refined freely. The BUMP instruction was used to avoid short intramolecular H-H contacts. The structure was refined using the TWIN keyword. The BASF parameter was refined to 12.6%. The four most disagreeable reflections were omitted.



**Refinement details for 1a:** The four most disagreeable reflections were omitted.

Crystal data for **1a**: C<sub>25</sub>H<sub>45</sub>BCINPRh,  $M_r = 539.76$ , yellow block, 0.156×0.122×0.069 mm<sup>3</sup>, triclinic space group  $P\bar{1}$ ,  $a = 7.2623(5)$  Å,  $b = 8.3682(6)$  Å,  $c = 23.6179(17)$  Å,  $\alpha = 81.735(2)^\circ$ ,  $\beta = 87.228(2)^\circ$ ,  $\gamma = 72.334(2)^\circ$ ,  $V = 1353.41(17)$  Å<sup>3</sup>,  $Z = 2$ ,  $\rho_{calcd} = 1.324$  g·cm<sup>-3</sup>,  $\mu = 0.801$  mm<sup>-1</sup>,  $F(000) = 568$ ,  $T = 100(2)$  K,  $R_I = 0.0494$ ,  $wR^2 = 0.0733$ , 5548 independent reflections [ $2\theta \leq 52.794^\circ$ ] and 284 parameters.

Crystal data for **1c**: C<sub>34</sub>H<sub>51</sub>BClFeNPRh,  $M_r = 709.74$ , orange block, 0.37×0.314×0.295 mm<sup>3</sup>, monoclinic space group  $P2_1/c$ ,  $a = 18.500(3)$  Å,  $b = 10.9446(14)$  Å,  $c = 16.701(5)$  Å,  $\beta = 99.868(18)^\circ$ ,  $V = 3331.5(13)$  Å<sup>3</sup>,  $Z = 4$ ,  $\rho_{calcd} = 1.415$  g·cm<sup>-3</sup>,  $\mu = 1.083$  mm<sup>-1</sup>,  $F(000) = 1480$ ,  $T = 100(2)$  K,  $R_I = 0.0189$ ,  $wR^2 = 0.0443$ , 6810 independent reflections [ $2\theta \leq 52.744^\circ$ ] and 373 parameters.

Crystal data for **1d**: C<sub>26</sub>H<sub>47</sub>BCINPRh,  $M_r = 553.78$ , orange block, 0.237×0.162×0.053 mm<sup>3</sup>, monoclinic space group  $P2_1/n$ ,  $a = 8.4198(13)$  Å,  $b = 22.107(5)$  Å,  $c = 15.400(3)$  Å,  $\beta = 100.678(15)^\circ$ ,  $V = 2816.8(9)$  Å<sup>3</sup>,  $Z = 4$ ,  $\rho_{calcd} = 1.306$  g·cm<sup>-3</sup>,  $\mu = 0.771$  mm<sup>-1</sup>,  $F(000) = 1168$ ,  $T = 100(2)$  K,  $R_I = 0.0361$ ,  $wR^2 = 0.0550$ , 5761 independent reflections [ $2\theta \leq 52.744^\circ$ ] and 294 parameters.

Crystal data for **1e**: C<sub>28</sub>H<sub>51</sub>BCINPRh,  $M_r = 581.83$ , orange block, 0.375×0.283×0.234 mm<sup>3</sup>, monoclinic space group  $P2_1$ ,  $a = 13.155(4)$  Å,  $b = 13.567(4)$  Å,  $c = 17.300(5)$  Å,  $\beta = 95.737(13)^\circ$ ,  $V = 3072.0(15)$  Å<sup>3</sup>,  $Z = 4$ ,  $\rho_{calcd} = 1.258$  g·cm<sup>-3</sup>,  $\mu = 0.711$  mm<sup>-1</sup>,  $F(000) = 1232$ ,  $T = 100(2)$  K,  $R_I = 0.0189$ ,  $wR^2 = 0.0477$ , 12580 independent reflections [ $2\theta \leq 52.744^\circ$ ] and 624 parameters.

Crystal data for **1f**: C<sub>28</sub>H<sub>47</sub>BCINPRh,  $M_r = 577.80$ , orange block, 0.299×0.246×0.224 mm<sup>3</sup>, monoclinic space group  $P2_1/n$ ,  $a = 17.729(7)$  Å,  $b = 9.767(4)$  Å,  $c = 19.228(8)$  Å,  $\beta = 115.848(10)^\circ$ ,  $V = 2996(2)$  Å<sup>3</sup>,  $Z = 4$ ,  $\rho_{calcd} = 1.281$  g·cm<sup>-3</sup>,  $\mu = 0.728$  mm<sup>-1</sup>,  $F(000) = 1216$ ,  $T = 100(2)$  K,  $R_I = 0.0264$ ,  $wR^2 = 0.0588$ , 6125 independent reflections [ $2\theta \leq 52.746^\circ$ ] and 312 parameters.

Crystal data for **1g**: C<sub>36</sub>H<sub>58</sub>B<sub>2</sub>CINO<sub>2</sub>PRh,  $M_r = 727.78$ , orange block, 0.303×0.284×0.172 mm<sup>3</sup>, monoclinic space group  $P2_1/n$ ,  $a = 11.385(5)$  Å,  $b = 27.454(4)$  Å,  $c = 12.146(2)$  Å,

$\beta = 95.31(3)^\circ$ ,  $V = 3779.9(19) \text{ \AA}^3$ ,  $Z = 4$ ,  $\rho_{\text{calcd}} = 1.279 \text{ g}\cdot\text{cm}^{-3}$ ,  $\mu = 0.595 \text{ mm}^{-1}$ ,  $F(000) = 1536$ ,  $T = 100(2) \text{ K}$ ,  $R_I = 0.0423$ ,  $wR^2 = 0.0830$ , 7727 independent reflections [ $2\theta \leq 52.742^\circ$ ] and 493 parameters.

Crystal data for **1h**:  $\text{C}_{32}\text{H}_{52}\text{BClN}_2\text{PRh}$ ,  $M_r = 644.89$ , orange block,  $0.286 \times 0.194 \times 0.158 \text{ mm}^3$ , monoclinic space group  $P2_1/n$ ,  $a = 8.3899(14) \text{ \AA}$ ,  $b = 20.844(4) \text{ \AA}$ ,  $c = 19.120(3) \text{ \AA}$ ,  $\beta = 93.632(11)^\circ$ ,  $V = 3336.9(10) \text{ \AA}^3$ ,  $Z = 4$ ,  $\rho_{\text{calcd}} = 1.284 \text{ g}\cdot\text{cm}^{-3}$ ,  $\mu = 0.662 \text{ mm}^{-1}$ ,  $F(000) = 1360$ ,  $T = 100(2) \text{ K}$ ,  $R_I = 0.0277$ ,  $wR^2 = 0.0609$ , 6821 independent reflections [ $2\theta \leq 52.742^\circ$ ] and 357 parameters.

Crystal data for **1i**:  $\text{C}_{31}\text{H}_{46}\text{BClF}_3\text{NPRh}$ ,  $M_r = 669.83$ , orange block,  $0.329 \times 0.179 \times 0.143 \text{ mm}^3$ , monoclinic space group  $P2_1/c$ ,  $a = 14.758(4) \text{ \AA}$ ,  $b = 11.7829(18) \text{ \AA}$ ,  $c = 19.206(7) \text{ \AA}$ ,  $\beta = 107.324(9)^\circ$ ,  $V = 3188.3(16) \text{ \AA}^3$ ,  $Z = 4$ ,  $\rho_{\text{calcd}} = 1.395 \text{ g}\cdot\text{cm}^{-3}$ ,  $\mu = 0.708 \text{ mm}^{-1}$ ,  $F(000) = 1392$ ,  $T = 100(2) \text{ K}$ ,  $R_I = 0.0226$ ,  $wR^2 = 0.0481$ , 6509 independent reflections [ $2\theta \leq 52.738^\circ$ ] and 364 parameters.

Crystal data for **1j**:  $\text{C}_{39}\text{H}_{55}\text{BClF}_3\text{N}_2\text{PRh}$ ,  $M_r = 788.99$ , orange block,  $0.268 \times 0.259 \times 0.102 \text{ mm}^3$ , monoclinic space group  $P2_1/c$ ,  $a = 16.099(7) \text{ \AA}$ ,  $b = 12.139(3) \text{ \AA}$ ,  $c = 20.044(6) \text{ \AA}$ ,  $\beta = 96.049(12)^\circ$ ,  $V = 3895(2) \text{ \AA}^3$ ,  $Z = 4$ ,  $\rho_{\text{calcd}} = 1.345 \text{ g}\cdot\text{cm}^{-3}$ ,  $\mu = 0.592 \text{ mm}^{-1}$ ,  $F(000) = 1648$ ,  $T = 103(2) \text{ K}$ ,  $R_I = 0.0341$ ,  $wR^2 = 0.0636$ , 7955 independent reflections [ $2\theta \leq 52.744^\circ$ ] and 447 parameters.

Crystal data for **1k**:  $\text{C}_{43}\text{H}_{69}\text{B}_2\text{ClN}_2\text{PRh}$ ,  $M_r = 804.95$ , orange block,  $0.29 \times 0.285 \times 0.256 \text{ mm}^3$ , triclinic space group  $P\bar{1}$ ,  $a = 9.269(3) \text{ \AA}$ ,  $b = 12.103(3) \text{ \AA}$ ,  $c = 20.168(7) \text{ \AA}$ ,  $\alpha = 106.938(10)^\circ$ ,  $\beta = 91.473(14)^\circ$ ,  $\gamma = 96.900(13)^\circ$ ,  $V = 2144.3(11) \text{ \AA}^3$ ,  $Z = 2$ ,  $\rho_{\text{calcd}} = 1.247 \text{ g}\cdot\text{cm}^{-3}$ ,  $\mu = 0.529 \text{ mm}^{-1}$ ,  $F(000) = 856$ ,  $T = 101(2) \text{ K}$ ,  $R_I = 0.0236$ ,  $wR^2 = 0.0561$ , 8743 independent reflections [ $2\theta \leq 52.744^\circ$ ] and 471 parameters.

Crystal data for **1l**:  $\text{C}_{39}\text{H}_{56}\text{BClNPRh}$ ,  $M_r = 718.98$ , orange block,  $0.14 \times 0.102 \times 0.041 \text{ mm}^3$ , monoclinic space group  $P2_1/c$ ,  $a = 18.735(7) \text{ \AA}$ ,  $b = 25.249(11) \text{ \AA}$ ,  $c = 8.208(4) \text{ \AA}$ ,  $\beta = 102.644(12)^\circ$ ,  $V = 3788(3) \text{ \AA}^3$ ,  $Z = 4$ ,  $\rho_{\text{calcd}} = 1.261 \text{ g}\cdot\text{cm}^{-3}$ ,  $\mu = 0.590 \text{ mm}^{-1}$ ,  $F(000) = 1516$ ,  $T = 100(2) \text{ K}$ ,  $R_I = 0.0423$ ,  $wR^2 = 0.0659$ , 7762 independent reflections [ $2\theta \leq 52.746^\circ$ ] and 409 parameters.

Crystal data for **2a**: C<sub>22</sub>H<sub>42</sub>BCINP<sub>2</sub>Rh,  $M_r = 531.67$ , yellow block, 0.426×0.28×0.182 mm<sup>3</sup>, orthorhombic space group *Pbca*,  $a = 10.096(3)$  Å,  $b = 18.272(9)$  Å,  $c = 28.341(2)$  Å,  $V = 5228(3)$  Å<sup>3</sup>,  $Z = 8$ ,  $\rho_{calcd} = 1.351$  g·cm<sup>-3</sup>,  $\mu = 0.886$  mm<sup>-1</sup>,  $F(000) = 2224$ ,  $T = 100(2)$  K,  $R_I = 0.0250$ ,  $wR^2 = 0.0578$ , 5152 independent reflections [ $2\theta \leq 52.04^\circ$ ] and 266 parameters.

Crystal data for **2b**: C<sub>27</sub>H<sub>44</sub>BCINP<sub>2</sub>Rh,  $M_r = 593.74$ , yellow block, 0.25×0.243×0.216 mm<sup>3</sup>, monoclinic space group *P2<sub>1</sub>/n*,  $a = 9.117(3)$  Å,  $b = 18.699(4)$  Å,  $c = 17.128(6)$  Å,  $\beta = 92.047(16)^\circ$ ,  $V = 2918.0(15)$  Å<sup>3</sup>,  $Z = 4$ ,  $\rho_{calcd} = 1.352$  g·cm<sup>-3</sup>,  $\mu = 0.802$  mm<sup>-1</sup>,  $F(000) = 1240$ ,  $T = 101(2)$  K,  $R_I = 0.0222$ ,  $wR^2 = 0.0479$ , 5966 independent reflections [ $2\theta \leq 52.744^\circ$ ] and 310 parameters.

Crystal data for **2c**: C<sub>31</sub>H<sub>48</sub>BCIFeNP<sub>2</sub>Rh,  $M_r = 701.66$ , yellow needle, 0.417×0.164×0.088 mm<sup>3</sup>, monoclinic space group *P2<sub>1</sub>/n*,  $a = 11.621(3)$  Å,  $b = 38.859(7)$  Å,  $c = 14.802(4)$  Å,  $\beta = 99.837(7)^\circ$ ,  $V = 6586(3)$  Å<sup>3</sup>,  $Z = 8$ ,  $\rho_{calcd} = 1.415$  g·cm<sup>-3</sup>,  $\mu = 1.141$  mm<sup>-1</sup>,  $F(000) = 2912$ ,  $T = 100(2)$  K,  $R_I = 0.0307$ ,  $wR^2 = 0.0497$ , 13475 independent reflections [ $2\theta \leq 52.744^\circ$ ] and 709 parameters.

Crystal data for **2d**: C<sub>23</sub>H<sub>44</sub>BCINP<sub>2</sub>Rh,  $M_r = 545.70$ , yellow block, 0.415×0.30×0.272 mm<sup>3</sup>, monoclinic space group *P2<sub>1</sub>/c*,  $a = 13.118(5)$  Å,  $b = 14.618(8)$  Å,  $c = 28.215(10)$  Å,  $\beta = 92.720(16)^\circ$ ,  $V = 5404(4)$  Å<sup>3</sup>,  $Z = 8$ ,  $\rho_{calcd} = 1.341$  g·cm<sup>-3</sup>,  $\mu = 0.859$  mm<sup>-1</sup>,  $F(000) = 2288$ ,  $T = 100(2)$  K,  $R_I = 0.0237$ ,  $wR^2 = 0.0575$ , 10634 independent reflections [ $2\theta \leq 52.044^\circ$ ] and 591 parameters.

Crystal data for **2e**: C<sub>25</sub>H<sub>48</sub>BCINP<sub>2</sub>Rh,  $M_r = 573.75$ , yellow block, 0.265×0.216×0.121 mm<sup>3</sup>, triclinic space group *P*  $\bar{1}$ ,  $a = 9.9075(19)$  Å,  $b = 10.1161(14)$  Å,  $c = 14.978(4)$  Å,  $\alpha = 84.197(7)^\circ$ ,  $\beta = 79.842(10)^\circ$ ,  $\gamma = 77.786(7)^\circ$ ,  $V = 1441.0(5)$  Å<sup>3</sup>,  $Z = 2$ ,  $\rho_{calcd} = 1.322$  g·cm<sup>-3</sup>,  $\mu = 0.809$  mm<sup>-1</sup>,  $F(000) = 604$ ,  $T = 100(2)$  K,  $R_I = 0.0192$ ,  $wR^2 = 0.0479$ , 5907 independent reflections [ $2\theta \leq 52.744^\circ$ ] and 294 parameters.

Crystal data for **2f**: C<sub>90</sub>H<sub>147</sub>B<sub>3</sub>Cl<sub>3</sub>N<sub>3</sub>P<sub>6</sub>Rh<sub>3</sub>,  $M_r = 1904.43$ , yellow block, 0.321×0.242×0.228 mm<sup>3</sup>, triclinic space group *P*  $\bar{1}$ ,  $a = 12.921(2)$  Å,  $b = 20.038(5)$  Å,  $c = 21.929(4)$  Å,  $\alpha = 107.641(11)^\circ$ ,  $\beta = 104.548(13)^\circ$ ,  $\gamma = 103.913(12)^\circ$ ,  $V = 4919.3(17)$  Å<sup>3</sup>,

$Z = 2$ ,  $\rho_{\text{calcd}} = 1.286 \text{ g}\cdot\text{cm}^{-3}$ ,  $\mu = 0.718 \text{ mm}^{-1}$ ,  $F(000) = 1998$ ,  $T = 100(2) \text{ K}$ ,  $R_I = 0.0346$ ,  $wR^2 = 0.0753$ , 20119 independent reflections [ $2\theta \leq 52.744^\circ$ ] and 1054 parameters.

Crystal data for **2g**:  $\text{C}_{33}\text{H}_{55}\text{B}_2\text{ClINO}_2\text{P}_2\text{Rh}$ ,  $M_r = 719.70$ , yellow block,  $0.226 \times 0.22 \times 0.18 \text{ mm}^3$ , monoclinic space group  $P2_1/c$ ,  $a = 9.831(6) \text{ \AA}$ ,  $b = 19.140(9) \text{ \AA}$ ,  $c = 19.599(10) \text{ \AA}$ ,  $\beta = 101.13(3)^\circ$ ,  $V = 3618(3) \text{ \AA}^3$ ,  $Z = 4$ ,  $\rho_{\text{calcd}} = 1.321 \text{ g}\cdot\text{cm}^{-3}$ ,  $\mu = 0.663 \text{ mm}^{-1}$ ,  $F(000) = 1512$ ,  $T = 100(2) \text{ K}$ ,  $R_I = 0.0626$ ,  $wR^2 = 0.0926$ , 7391 independent reflections [ $2\theta \leq 52.742^\circ$ ] and 395 parameters.

Crystal data for **2l**:  $\text{C}_{30}\text{H}_{47}\text{BClNP}_2\text{Rh}$ ,  $M_r = 632.79$ , yellow block,  $0.266 \times 0.258 \times 0.098 \text{ mm}^3$ , monoclinic space group  $C2/c$ ,  $a = 22.645(8) \text{ \AA}$ ,  $b = 18.484(6) \text{ \AA}$ ,  $c = 17.744(3) \text{ \AA}$ ,  $\beta = 122.497(8)^\circ$ ,  $V = 6264(3) \text{ \AA}^3$ ,  $Z = 8$ ,  $\rho_{\text{calcd}} = 1.342 \text{ g}\cdot\text{cm}^{-3}$ ,  $\mu = 0.752 \text{ mm}^{-1}$ ,  $F(000) = 2648$ ,  $T = 101(2) \text{ K}$ ,  $R_I = 0.0295$ ,  $wR^2 = 0.0574$ , 6403 independent reflections [ $2\theta \leq 52.744^\circ$ ] and 338 parameters.

Crystal data for **3a<sup>Me</sup>**:  $\text{C}_{30}\text{H}_{52}\text{BN}_3\text{PRh}$ ,  $M_r = 599.43$ , orange block,  $0.315 \times 0.244 \times 0.174 \text{ mm}^3$ , monoclinic space group  $P2_1/n$ ,  $a = 12.009(6) \text{ \AA}$ ,  $b = 18.218(8) \text{ \AA}$ ,  $c = 14.765(13) \text{ \AA}$ ,  $\beta = 107.74(2)^\circ$ ,  $V = 3077(3) \text{ \AA}^3$ ,  $Z = 4$ ,  $\rho_{\text{calcd}} = 1.294 \text{ g}\cdot\text{cm}^{-3}$ ,  $\mu = 0.630 \text{ mm}^{-1}$ ,  $F(000) = 1272$ ,  $T = 100(2) \text{ K}$ ,  $R_I = 0.0676$ ,  $wR^2 = 0.0922$ , 6284 independent reflections [ $2\theta \leq 52.744^\circ$ ] and 339 parameters.

Crystal data for **3a<sup>iPr</sup>**:  $\text{C}_{34}\text{H}_{60}\text{BN}_3\text{PRh}$ ,  $M_r = 655.54$ , orange block,  $0.20 \times 0.155 \times 0.09 \text{ mm}^3$ , orthorhombic space group  $P2_12_12_1$ ,  $a = 11.529(4) \text{ \AA}$ ,  $b = 16.437(5) \text{ \AA}$ ,  $c = 18.831(5) \text{ \AA}$ ,  $V = 3568.4(18) \text{ \AA}^3$ ,  $Z = 4$ ,  $\rho_{\text{calcd}} = 1.220 \text{ g}\cdot\text{cm}^{-3}$ ,  $\mu = 0.549 \text{ mm}^{-1}$ ,  $F(000) = 1400$ ,  $T = 100(2) \text{ K}$ ,  $R_I = 0.0305$ ,  $wR^2 = 0.0708$ , 7016 independent reflections [ $2\theta \leq 52.042^\circ$ ] and 377 parameters.

Crystal data for **3e<sup>Me</sup>**:  $\text{C}_{36}\text{H}_{65}\text{BN}_3\text{PRh}$ ,  $M_r = 684.60$ , yellow plate,  $0.212 \times 0.13 \times 0.034 \text{ mm}^3$ , monoclinic space group  $P2_1/c$ ,  $a = 11.713(2) \text{ \AA}$ ,  $b = 16.0270(19) \text{ \AA}$ ,  $c = 20.498(4) \text{ \AA}$ ,  $\beta = 106.075(7)^\circ$ ,  $V = 3697.5(11) \text{ \AA}^3$ ,  $Z = 4$ ,  $\rho_{\text{calcd}} = 1.230 \text{ g}\cdot\text{cm}^{-3}$ ,  $\mu = 0.532 \text{ mm}^{-1}$ ,  $F(000) = 1468$ ,  $T = 100(2) \text{ K}$ ,  $R_I = 0.0366$ ,  $wR^2 = 0.0692$ , 7569 independent reflections [ $2\theta \leq 52.744^\circ$ ] and 396 parameters.

Crystal data for **4a<sup>iPr</sup>**:  $\text{C}_{34}\text{H}_{55}\text{BN}_5\text{Rh}$ ,  $M_r = 647.55$ , yellow needle,  $0.266 \times 0.119 \times 0.056 \text{ mm}^3$ , monoclinic space group  $P2_1/n$ ,  $a = 11.060(3) \text{ \AA}$ ,  $b = 18.039(3) \text{ \AA}$ ,  $c = 17.701(2) \text{ \AA}$ ,

$\beta = 94.498(12)^\circ$ ,  $V = 3520.7(13) \text{ \AA}^3$ ,  $Z = 4$ ,  $\rho_{\text{calcd}} = 1.222 \text{ g}\cdot\text{cm}^{-3}$ ,  $\mu = 0.514 \text{ mm}^{-1}$ ,  $F(000) = 1376$ ,  $T = 100(2) \text{ K}$ ,  $R_I = 0.0292$ ,  $wR^2 = 0.0577$ , 7203 independent reflections [ $2\theta \leq 52.744^\circ$ ] and 384 parameters.

Crystal data for **4e<sup>Pr</sup>**:  $\text{C}_{37}\text{H}_{61}\text{BN}_5\text{Rh}$ ,  $M_r = 689.62$ , orange block,  $0.31 \times 0.257 \times 0.11 \text{ mm}^3$ , monoclinic space group  $P2_1/n$ ,  $a = 11.969(2) \text{ \AA}$ ,  $b = 19.828(4) \text{ \AA}$ ,  $c = 15.990(3) \text{ \AA}$ ,  $\beta = 91.168(6)^\circ$ ,  $V = 3793.9(12) \text{ \AA}^3$ ,  $Z = 4$ ,  $\rho_{\text{calcd}} = 1.207 \text{ g}\cdot\text{cm}^{-3}$ ,  $\mu = 0.481 \text{ mm}^{-1}$ ,  $F(000) = 1472$ ,  $T = 100(2) \text{ K}$ ,  $R_I = 0.0237$ ,  $wR^2 = 0.0517$ , 7745 independent reflections [ $2\theta \leq 52.744^\circ$ ] and 453 parameters.

Crystal data for **5**:  $\text{C}_{28}\text{H}_{51}\text{BClNPRh}$ ,  $M_r = 581.83$ , yellow needles,  $0.417 \times 0.279 \times 0.156 \text{ mm}^3$ , monoclinic space group  $P2_1/n$ ,  $a = 11.254(4) \text{ \AA}$ ,  $b = 9.024(2) \text{ \AA}$ ,  $c = 29.373(8) \text{ \AA}$ ,  $\beta = 98.317(13)^\circ$ ,  $V = 2951.7(14) \text{ \AA}^3$ ,  $Z = 4$ ,  $\rho_{\text{calcd}} = 1.309 \text{ g}\cdot\text{cm}^{-3}$ ,  $\mu = 0.740 \text{ mm}^{-1}$ ,  $F(000) = 1232$ ,  $T = 100(2) \text{ K}$ ,  $R_I = 0.0553$ ,  $wR^2 = 0.0688$ , 5800 independent reflections [ $2\theta \leq 52.04^\circ$ ] and 315 parameters.

Crystal data for **6**:  $\text{C}_{28}\text{H}_{51}\text{BClNPRh}$ ,  $M_r = 581.83$ , orange needle,  $0.512 \times 0.077 \times 0.057 \text{ mm}^3$ , monoclinic space group  $P2_1/c$ ,  $a = 14.740(3) \text{ \AA}$ ,  $b = 15.319(4) \text{ \AA}$ ,  $c = 14.833(3) \text{ \AA}$ ,  $\beta = 116.828(9)^\circ$ ,  $V = 2988.9(12) \text{ \AA}^3$ ,  $Z = 4$ ,  $\rho_{\text{calcd}} = 1.293 \text{ g}\cdot\text{cm}^{-3}$ ,  $\mu = 0.730 \text{ mm}^{-1}$ ,  $F(000) = 1232$ ,  $T = 100(2) \text{ K}$ ,  $R_I = 0.0438$ ,  $wR^2 = 0.0981$ , 6124 independent reflections [ $2\theta \leq 52.74^\circ$ ] and 321 parameters.

Crystal data for **7**:  $\text{C}_{28}\text{H}_{51}\text{BClNPRh}$ ,  $M_r = 581.83$ , orange block,  $0.121 \times 0.093 \times 0.069 \text{ mm}^3$ , orthorhombic space group  $Pca2_1$ ,  $a = 21.577(5) \text{ \AA}$ ,  $b = 8.0109(19) \text{ \AA}$ ,  $c = 34.845(8) \text{ \AA}$ ,  $V = 6023(2) \text{ \AA}^3$ ,  $Z = 8$ ,  $\rho_{\text{calcd}} = 1.283 \text{ g}\cdot\text{cm}^{-3}$ ,  $\mu = 0.725 \text{ mm}^{-1}$ ,  $F(000) = 2464$ ,  $T = 100(2) \text{ K}$ ,  $R_I = 0.0695$ ,  $wR^2 = 0.1221$ , 13278 independent reflections [ $2\theta \leq 54.206^\circ$ ] and 634 parameters.

Crystal data for **I(Ia)**:  $\text{C}_{21}\text{H}_{28}\text{BN}$ ,  $M_r = 305.25$ , colourless plate,  $0.412 \times 0.224 \times 0.106 \text{ mm}^3$ , monoclinic space group  $P2_1/c$ ,  $a = 16.329(5) \text{ \AA}$ ,  $b = 9.070(3) \text{ \AA}$ ,  $c = 13.365(3) \text{ \AA}$ ,  $\beta = 110.285(5)^\circ$ ,  $V = 1856.8(8) \text{ \AA}^3$ ,  $Z = 4$ ,  $\rho_{\text{calcd}} = 1.092 \text{ g}\cdot\text{cm}^{-3}$ ,  $\mu = 0.061 \text{ mm}^{-1}$ ,  $F(000) = 664$ ,  $T = 100(2) \text{ K}$ ,  $R_I = 0.0497$ ,  $wR^2 = 0.1248$ , 3811 independent reflections [ $2\theta \leq 52.744^\circ$ ] and 216 parameters.

Crystal data for **I(1b)**:  $C_{21}H_{28}BN$ ,  $M_r = 305.25$ , colourless plate,  $0.291 \times 0.157 \times 0.108 \text{ mm}^3$ , orthorhombic space group  $Pca2_1$ ,  $a = 12.670(8) \text{ \AA}$ ,  $b = 11.135(6) \text{ \AA}$ ,  $c = 13.004(8) \text{ \AA}$ ,  $V = 1834.6(18) \text{ \AA}^3$ ,  $Z = 4$ ,  $\rho_{\text{calcd}} = 1.105 \text{ g} \cdot \text{cm}^{-3}$ ,  $\mu = 0.062 \text{ mm}^{-1}$ ,  $F(000) = 664$ ,  $T = 100(2) \text{ K}$ ,  $R_I = 0.0484$ ,  $wR^2 = 0.0961$ , 3484 independent reflections [ $2\theta \leq 52.724^\circ$ ] and 216 parameters.

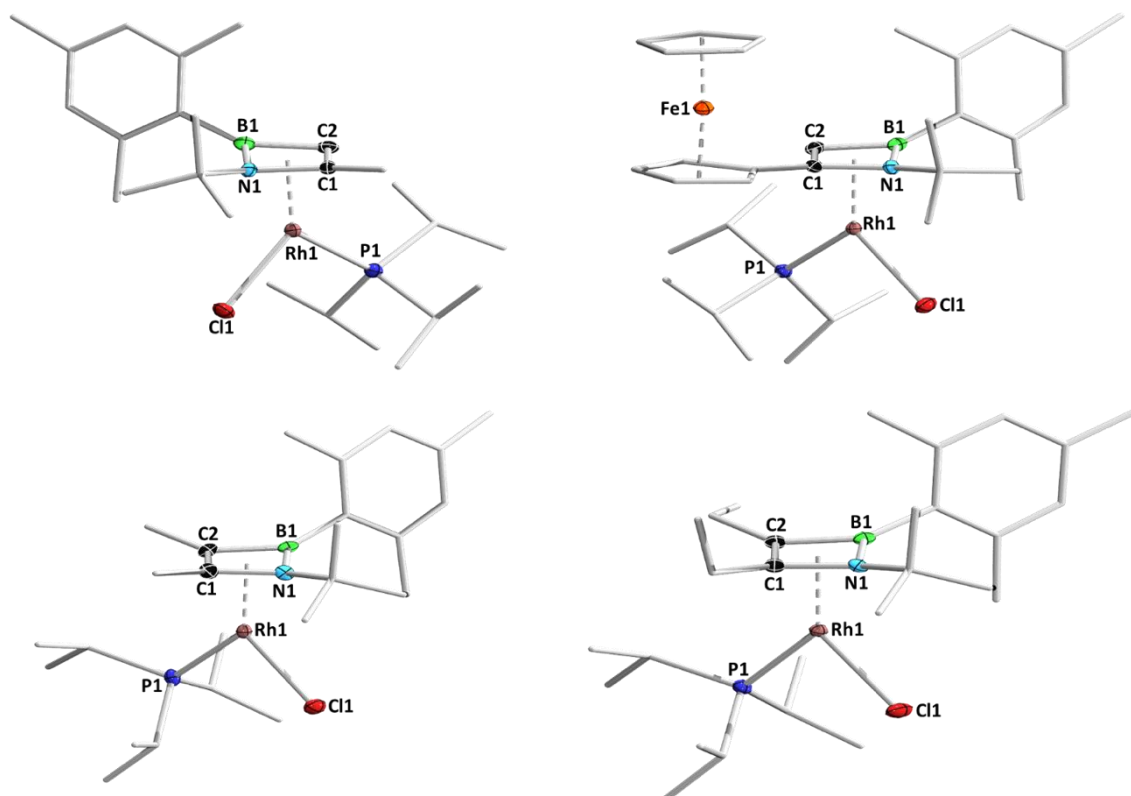

**Figure S135.** Crystallographically-derived molecular structures of complexes **1a** (top left), **1c** (top right), **1d** (bottom left) and **1e** (bottom right) with atomic displacement ellipsoids at the 50% probability level. Some ellipsoids and all hydrogen atoms are omitted for clarity.

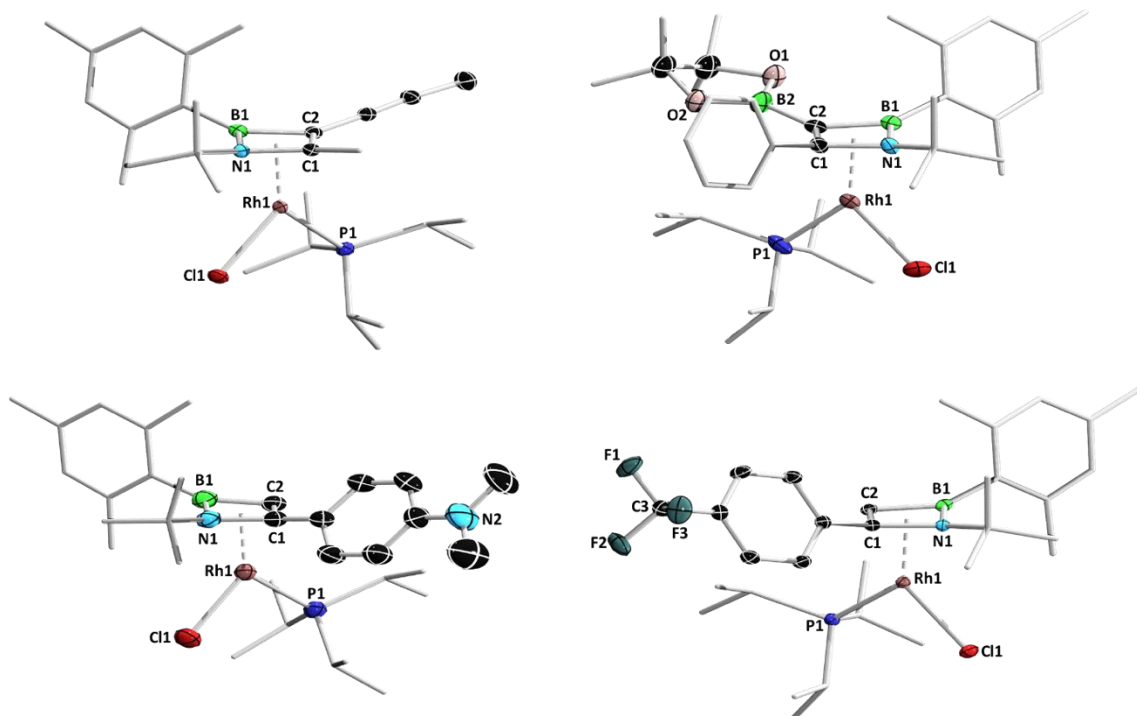

**Figure S136.** Crystallographically-derived molecular structures of complexes **1f** (top left), **1g** (top right), **1h** (bottom left) and **1i** (bottom right) with atomic displacement ellipsoids at the 50% probability level. Some ellipsoids and all hydrogen atoms are omitted for clarity.

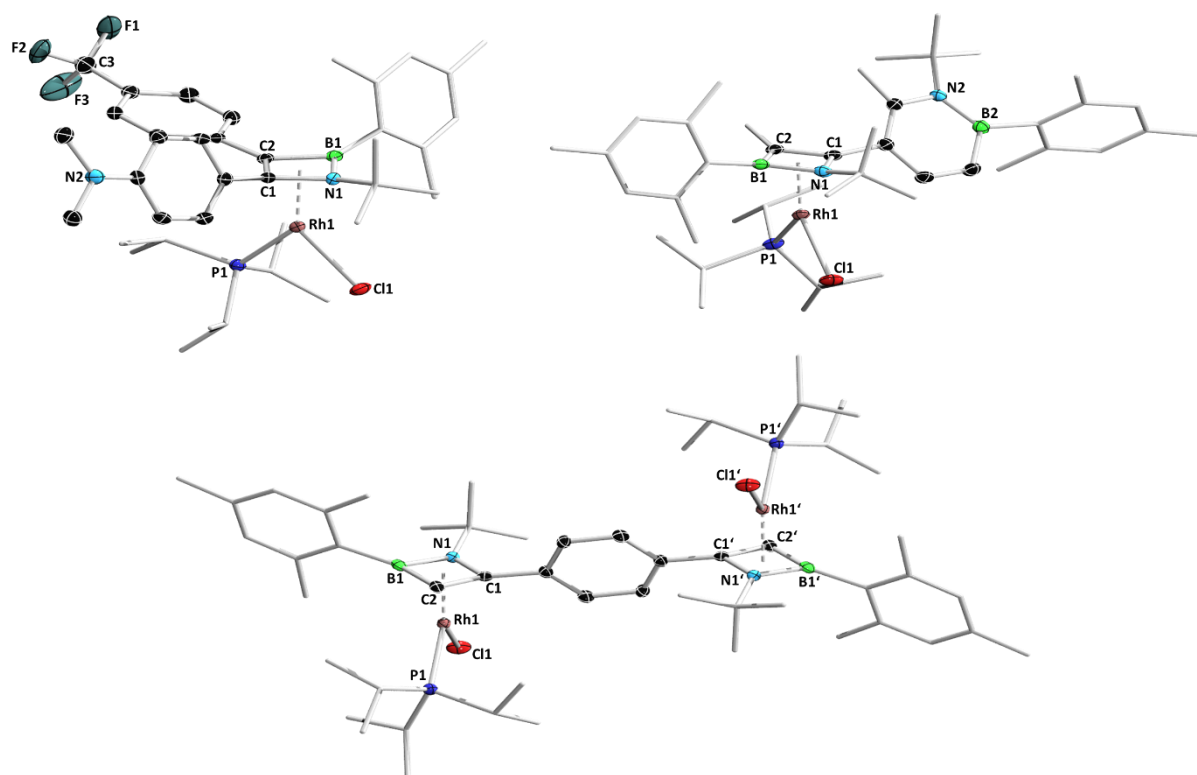

**Figure S137.** Crystallographically-derived molecular structures of complexes **1j** (left), **1k** (right) and **1l** (below) with atomic displacement ellipsoids at the 50% probability level. Co-crystallised solvent molecules, some ellipsoids and all hydrogen atoms are omitted for clarity.

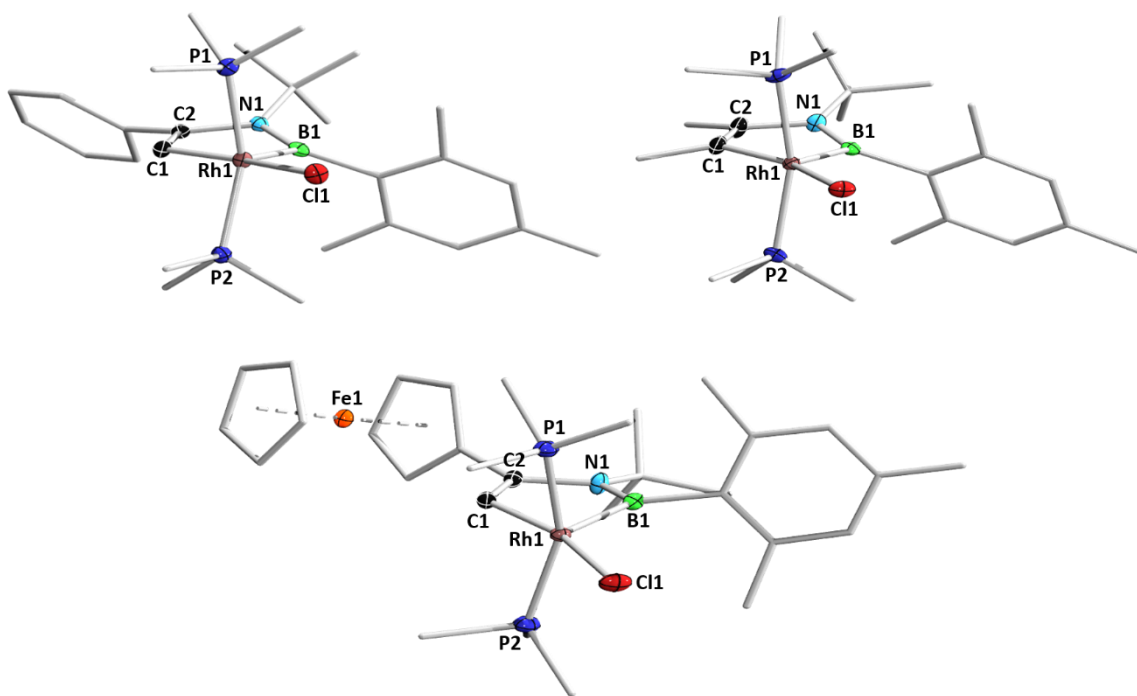

**Figure S138.** Crystallographically-derived molecular structures of complexes **2b** (left), **2c** (below) and **2d** (right) with atomic displacement ellipsoids at the 50% probability level. Some ellipsoids and all hydrogen atoms are omitted for clarity.

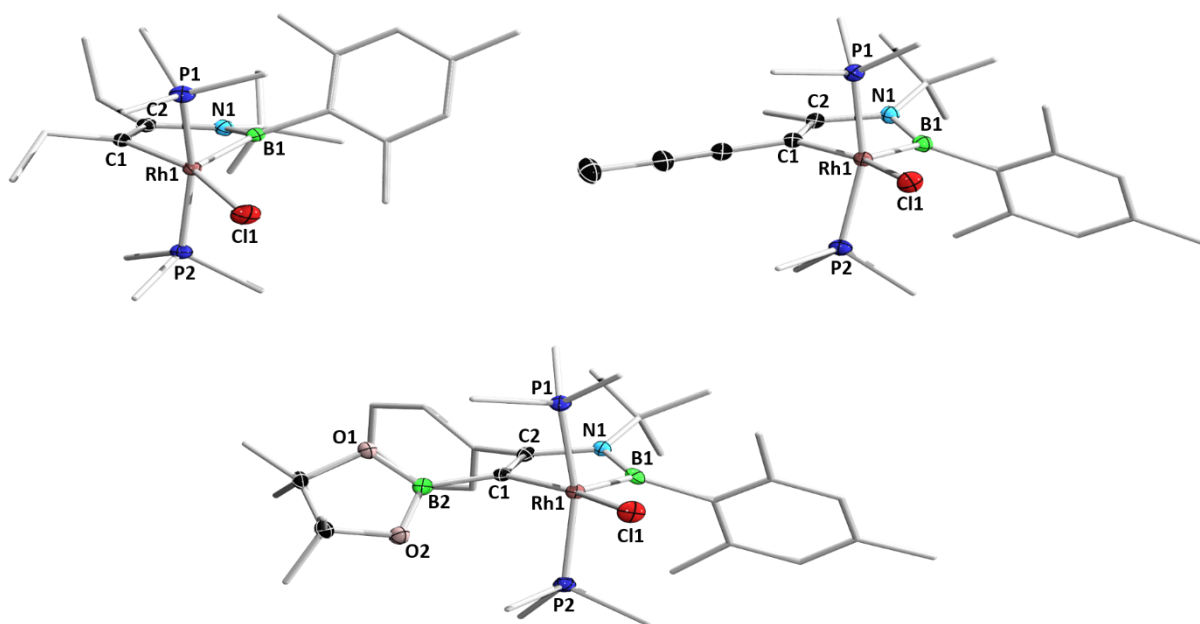

**Figure S139.** Crystallographically-derived molecular structures of complexes **2e** (left), **2f** (right) and **2g** (below) with atomic displacement ellipsoids at the 50% probability level. Co-crystallised solvent molecules, some ellipsoids and all hydrogen atoms are omitted for clarity.



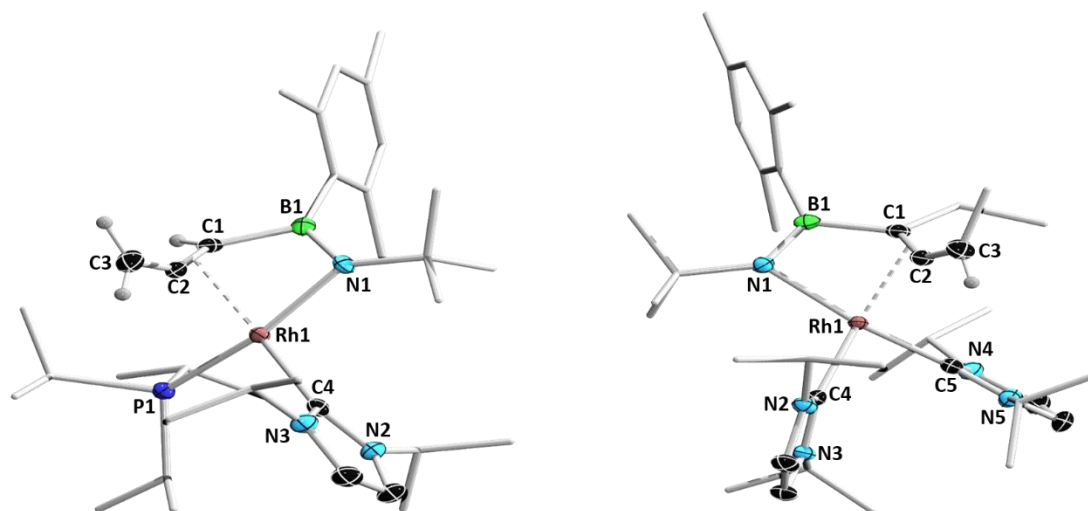

**Figure S140.** Crystallographically-derived molecular structures of complexes **3a<sup>iPr</sup>** (left) and **4e<sup>iPr</sup>** (right) with atomic displacement ellipsoids at the 50% probability level. Some ellipsoids and most hydrogen atoms are omitted for clarity.

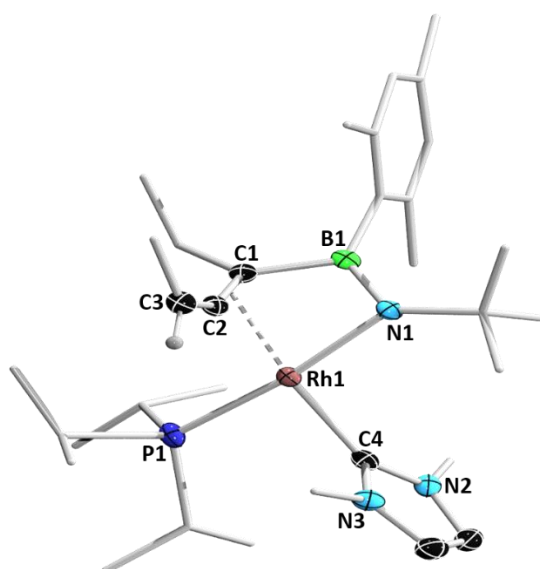

**Figure S141.** Crystallographically-derived molecular structures of complex **3e<sup>Me</sup>** with atomic displacement ellipsoids at the 50% probability level. Co-crystallised solvent molecules, some ellipsoids and most hydrogen atoms are omitted for clarity.

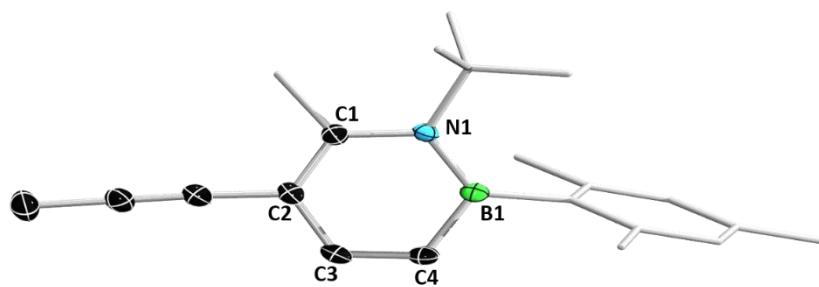

**Figure S142.** Crystallographically-derived molecular structure of compound **I(1a)** with atomic displacement ellipsoids at the 50% probability level. Some ellipsoids and all hydrogen atoms are omitted for clarity.

## Computational details

All calculations were performed with the Orca 4.1.1 software.<sup>13</sup> The structures were optimized with the PBE0 functional.<sup>14</sup> The def2-TZVP basis set<sup>15</sup> and its corresponding effective core potential (def2-ECP)<sup>16</sup> were used for Rh, while def2-SVP<sup>15</sup> was applied to all other atoms. Dispersion corrections were taken into account in the geometry optimizations by using Grimme's D3<sup>17</sup> model together with the Becke-Johnson (BJ) damping function.<sup>18</sup> In order to speed up the calculations, we included the resolution of the identity approximation for Coulomb integrals (RI-J)<sup>19</sup> and the chain of spheres numerical integration for Hartree-Fock exchange, COSX.<sup>20</sup> Hessian calculations were then performed for all optimized structures at the same level of theory. All geometries were characterized as minimum energy structures as all of their vibrational frequencies are real. Additionally, single-point calculations were performed at the PBE0-D3(BJ)/def2-QZVPP and TPSSh<sup>21</sup>-D3(BJ)/def2-QZVPP levels. Solvation effects were taken into account using the Solvation Model for Density (SMD)<sup>22</sup> with benzene ( $\epsilon = 2.28$ ) as solvent. A concentration correction of  $\Delta G^{0 \rightarrow *}$  =  $RT \ln(24.46) = 1.89 \text{ kcal mol}^{-1}$  ( $T = 298.15 \text{ K}$ ) was included in the free energies of all species in order to account for the change in standard states in going from gas phase (1 atm) to the condensed phase (1 M) and to properly describe associative/dissociative steps.<sup>23</sup> Images of the 3D structures were obtained with CYLview.<sup>24</sup>

By collecting the Gibbs free energies of all structures in which calculations were performed, we were able to construct a free energy map involving the Rh.*P*<sup>*i*</sup>Pr<sub>3</sub>  $\eta^4$ -azaborete complex **1a**, the respective azaborole complex **2a** featuring two PMe<sub>3</sub> ligands, and a variety of related species featuring distinct numbers (and types) of coordinating phosphines. We expect that, in solution, a complex equilibrium involving at least some of these species will be present, and a full description of the reaction from **1a** to **2a** should take into account all possible connections within the derived reaction network. We approached this problem by initially identifying in the map the thermodynamically preferred pathway, in which high-energy intermediates are avoided. We then performed calculations for identifying transition states (TS) along the thermodynamically preferred pathway. These were characterized by having one imaginary frequency mode in the Hessian calculation. In order to verify the connectivity of the TS, we performed additional geometry optimizations along the imaginary mode and intrinsic reaction coordinate (IRC)<sup>25</sup> calculations.

All species in the map are related to the complexes where R<sup>1</sup> and R<sup>2</sup> are Me and H, respectively. The structures were labelled as **1**, representing the azaborete, or **2**, related to the corresponding azaborole complexes. These can be followed by the letters **A**, **B**, or the combinations **AB** or **B<sub>2</sub>**. **A** stands for *Pi*Pr<sub>3</sub>, while **B** represents PMe<sub>3</sub>. Therefore, while **1** is the Rh  $\eta^4$ -azaborete chloride complex without any coordinating phosphine, **2AB** is the azaborole system in which the Rh features two coordinating phosphines: one *Pi*Pr<sub>3</sub> and one PMe<sub>3</sub>. All molecular structures involved in the construction of the free energy map are shown in Figures S139 and S140. A flowchart depicting the reaction network is shown in Figure S141, and a mechanistic proposal for the transformation of **1A** into **2B<sub>2</sub>** is given in Figure S142. Free energy values are given in kcal mol<sup>-1</sup> as relative to that of the reactant, **1A**.

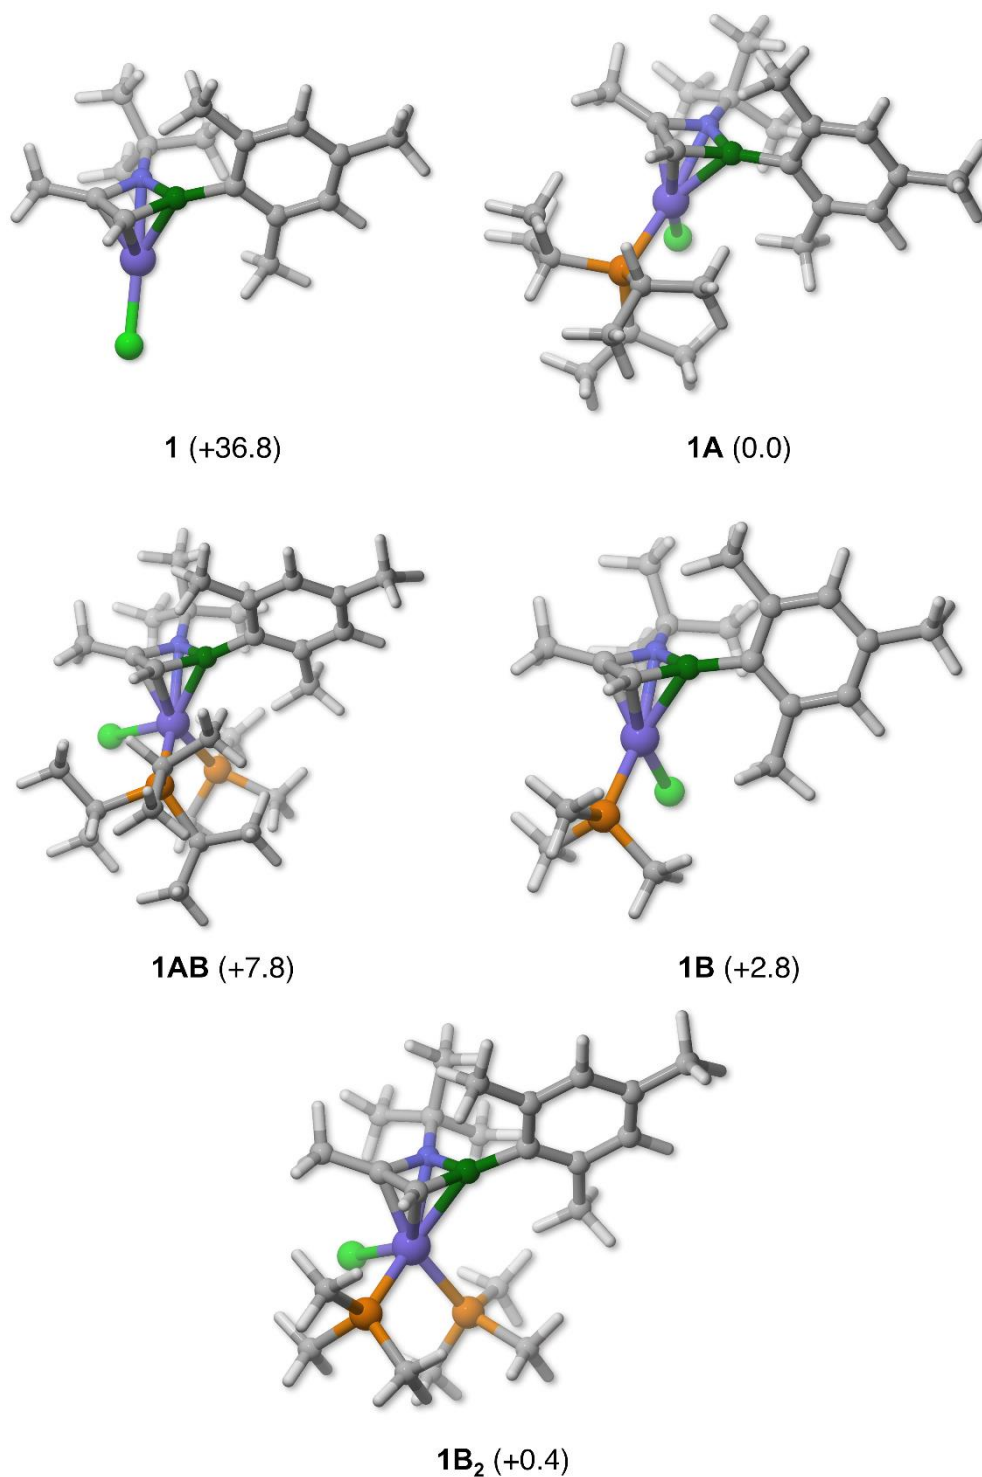

**Figure S143.** Images of the molecular structures of all species of type **1** taken into account in the free energy map. Geometries were optimized at the PBE0-D3(BJ)/def2-SVP,def2-TZVP(Rh) level of theory. The number in parenthesis are the respective free energies obtained at the PBE0-D3(BJ)/def2-QZVPP+SMD(Benzene) level.

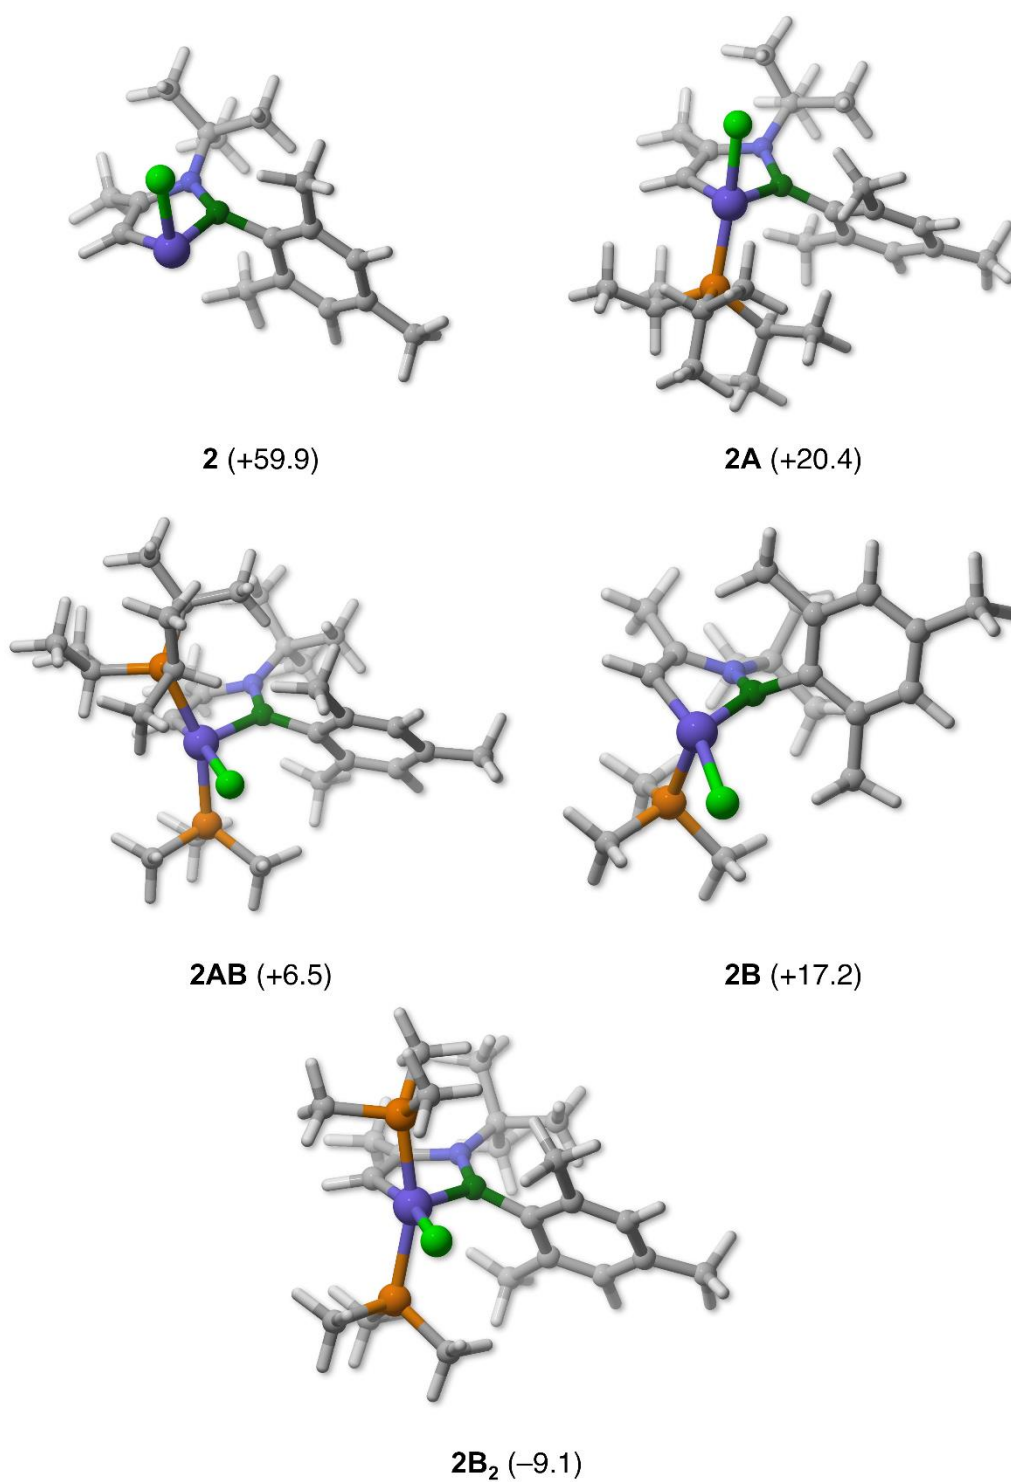

**Figure S144.** Images of the molecular structures of all species of type **2** taken into account in the free energy map. Geometries were optimized at the PBE0-D3(BJ)/def2-SVP,def2-TZVP(Rh) level of theory. The number in parenthesis are the respective free energies obtained at the PBE0-D3(BJ)/def2-QZVPP+SMD(Benzene) level.

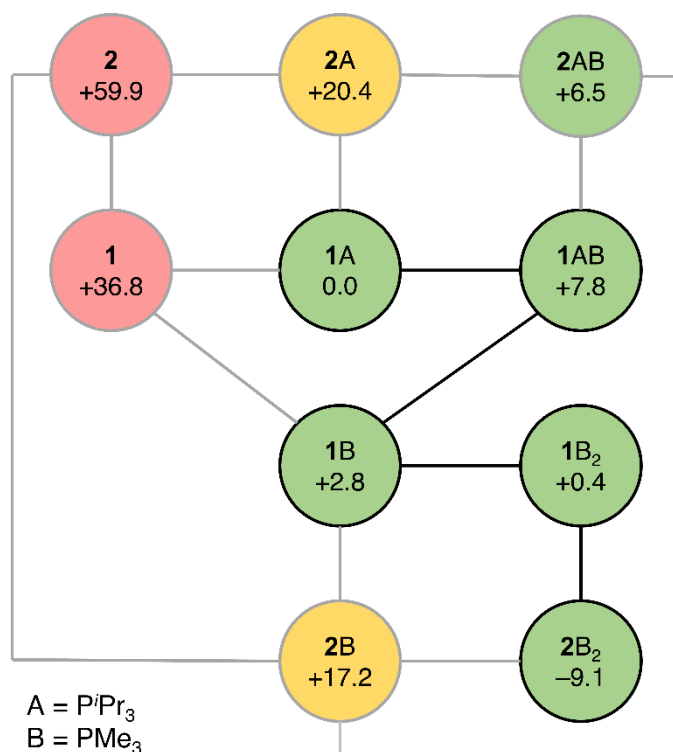

**Figure S145.** Free energy map illustrating distinct pathways connecting **1A** and **2B<sub>2</sub>**. Each circle represents an intermediate, whose free energy (kcal mol<sup>-1</sup>) is also shown. Green circles are low-energy intermediates whose energies are at most 10 kcal mol<sup>-1</sup> higher than that of **1A**. Yellow circles represent intermediates with moderate free energies. Red circles indicate high-energy intermediates. The black lines highlight the thermodynamically preferred pathway connecting **1A** and **2B<sub>2</sub>**. All energies are at the PBE0-D3(BJ)/def2-QZVPP+SMD level of theory.

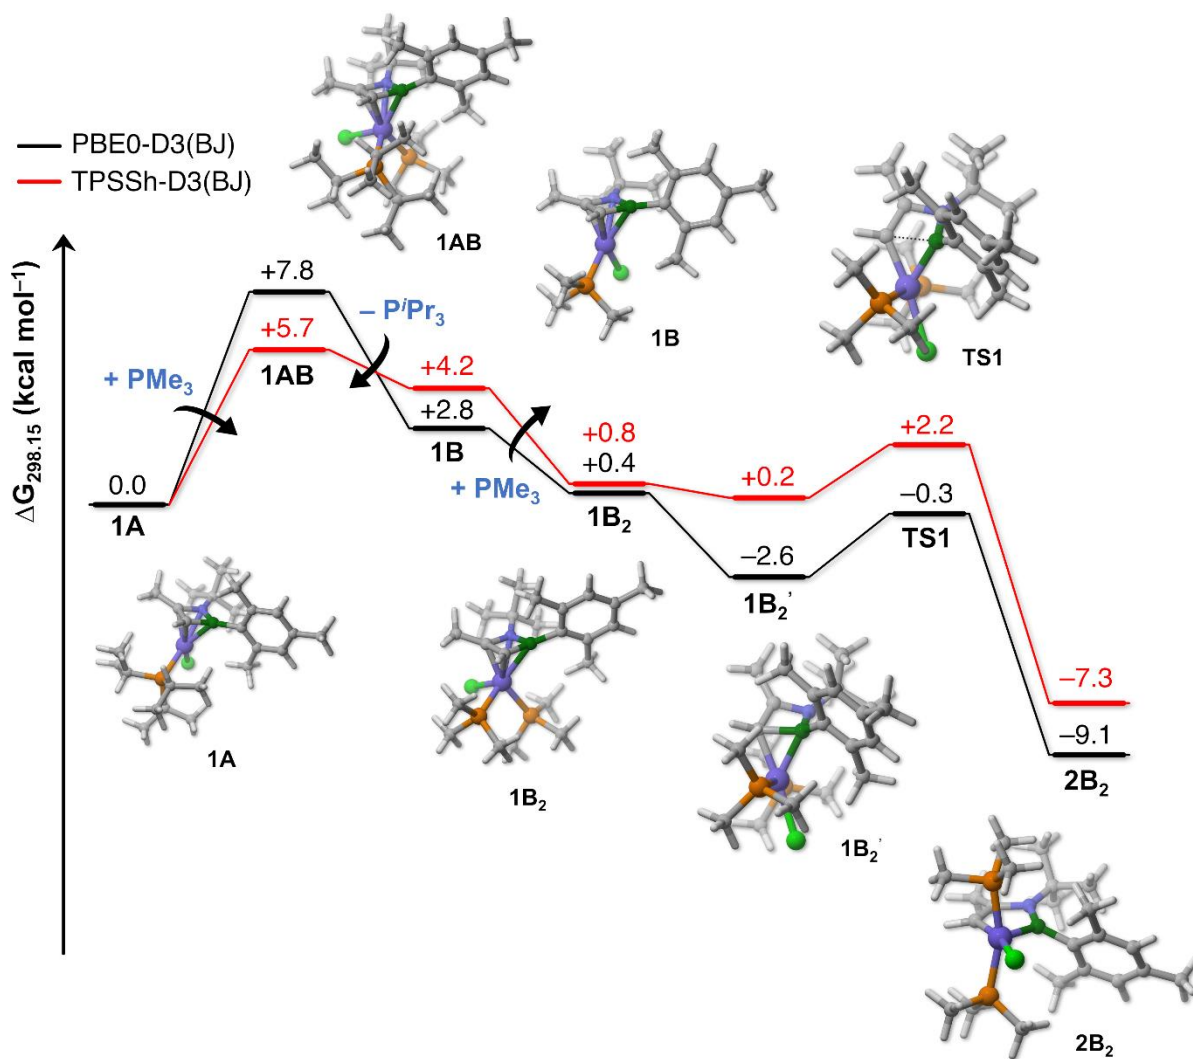

**Figure S146.** Relative Gibbs free energy profile ( $T = 298.15$  K) of a proposed mechanistic pathway connecting **1A** and **2B<sub>2</sub>** at the PBE0-D3(BJ)/def2-QZVPP+SMD (black curve) and TPSSh-D3(BJ)/def2-QZVPP+SMD (red curve) levels of theory.

## Cartesian coordinates

### PMe<sub>3</sub>

E(PBE0-D3(BJ)/def2-QZVPP+SMD): -460.900770 E<sub>h</sub>

E(TPSSh-D3(BJ)/def2-QZVPP+SMD): -461.217266 E<sub>h</sub>

$\Delta\Delta G(298)$ : 0.086349 E<sub>h</sub>

Lowest frequency: 187.58 cm<sup>-1</sup>

|   |              |              |             |
|---|--------------|--------------|-------------|
| P | 1.563305000  | 12.888692000 | 9.181026000 |
| C | 2.688000000  | 13.377363000 | 7.794656000 |
| H | 3.245086000  | 12.496434000 | 7.440349000 |
| H | 3.422815000  | 14.111218000 | 8.158511000 |
| H | 2.137841000  | 13.814817000 | 6.944224000 |
| C | 0.380781000  | 11.819362000 | 8.244674000 |
| H | -0.003795000 | 12.307638000 | 7.333585000 |
| H | -0.469862000 | 11.559535000 | 8.892869000 |
| H | 0.879571000  | 10.880242000 | 7.959920000 |
| C | 0.552072000  | 14.435594000 | 9.283805000 |
| H | 0.180827000  | 14.759198000 | 8.296725000 |
| H | 1.162190000  | 15.243230000 | 9.715828000 |
| H | -0.308894000 | 14.273038000 | 9.949322000 |

### PiPr<sub>3</sub>

E(PBE0-D3(BJ)/def2-QZVPP+SMD): -696.594465 E<sub>h</sub>

E(TPSSh-D3(BJ)/def2-QZVPP+SMD): -697.229504 E<sub>h</sub>

$\Delta\Delta G(298.15)$ : 0.248698 E<sub>h</sub>

Lowest frequency: 53.55 cm<sup>-1</sup>

|   |             |             |             |
|---|-------------|-------------|-------------|
| P | 6.142848000 | 3.328984000 | 3.225734000 |
| C | 4.449714000 | 2.497452000 | 3.153518000 |
| H | 3.832087000 | 3.218522000 | 3.719467000 |
| C | 4.462397000 | 1.202240000 | 3.962107000 |



|   |             |             |             |
|---|-------------|-------------|-------------|
| H | 3.434217000 | 0.852916000 | 4.152231000 |
| H | 4.961491000 | 1.327964000 | 4.935355000 |
| H | 4.980340000 | 0.398947000 | 3.415535000 |
| C | 3.783276000 | 2.288859000 | 1.797609000 |
| H | 2.768719000 | 1.877037000 | 1.936328000 |
| H | 4.337109000 | 1.577035000 | 1.172176000 |
| H | 3.677250000 | 3.224454000 | 1.230179000 |
| C | 7.380921000 | 2.131272000 | 2.483681000 |
| H | 8.214487000 | 2.820064000 | 2.260361000 |
| C | 7.901335000 | 1.166973000 | 3.546394000 |
| H | 8.780244000 | 0.618007000 | 3.170089000 |
| H | 7.146821000 | 0.419868000 | 3.830853000 |
| H | 8.196198000 | 1.704434000 | 4.460263000 |
| C | 7.017263000 | 1.413897000 | 1.189777000 |
| H | 7.902498000 | 0.907815000 | 0.768747000 |
| H | 6.633801000 | 2.104633000 | 0.424546000 |
| H | 6.255545000 | 0.637328000 | 1.357506000 |
| C | 5.998106000 | 4.630541000 | 1.880661000 |
| H | 5.626148000 | 4.161729000 | 0.952847000 |
| C | 7.349639000 | 5.277810000 | 1.589228000 |
| H | 7.222215000 | 6.133596000 | 0.906471000 |
| H | 8.057944000 | 4.585928000 | 1.111386000 |
| H | 7.815044000 | 5.659678000 | 2.513094000 |
| C | 4.995448000 | 5.687524000 | 2.337315000 |
| H | 4.862518000 | 6.460544000 | 1.562794000 |
| H | 5.351534000 | 6.186164000 | 3.253205000 |
| H | 4.003057000 | 5.264452000 | 2.556939000 |

**1**E(PBE0-D3(BJ)/def2-QZVPP+SMD): -1274.000389 E<sub>h</sub>E(TPSSh-D3(BJ)/def2-QZVPP+SMD): -1275.083890 E<sub>h</sub> $\Delta\Delta G(298.15)$ : 0.321545 E<sub>h</sub>Lowest frequency: 27.48 cm<sup>-1</sup>

|    |             |             |             |
|----|-------------|-------------|-------------|
| C  | 5.478500000 | 5.240764000 | 6.342528000 |
| N  | 6.480362000 | 5.048011000 | 7.341453000 |
| B  | 6.199537000 | 3.536955000 | 7.339958000 |
| Cl | 7.482134000 | 3.545393000 | 3.414921000 |
| C  | 4.793646000 | 6.481405000 | 5.905865000 |
| H  | 4.293859000 | 6.281982000 | 4.947784000 |
| H  | 5.488893000 | 7.318378000 | 5.764902000 |
| H  | 4.022121000 | 6.781678000 | 6.633187000 |
| C  | 5.158231000 | 3.835211000 | 6.227324000 |
| H  | 4.404421000 | 3.361647000 | 5.599741000 |
| Rh | 7.024296000 | 4.313377000 | 5.484507000 |
| C  | 6.249940000 | 6.804096000 | 9.015617000 |
| H  | 6.802013000 | 7.478007000 | 9.687564000 |
| H  | 5.642776000 | 6.124438000 | 9.632483000 |
| H  | 5.572335000 | 7.418818000 | 8.405307000 |
| C  | 8.184045000 | 5.222049000 | 9.044829000 |
| H  | 8.788308000 | 5.912241000 | 9.652625000 |
| H  | 8.866065000 | 4.604706000 | 8.441996000 |
| H  | 7.628963000 | 4.552156000 | 9.715626000 |
| C  | 7.235935000 | 6.016146000 | 8.151675000 |
| C  | 5.831281000 | 2.196382000 | 9.471060000 |
| C  | 6.649764000 | 2.423862000 | 8.343443000 |
| C  | 8.047283000 | 6.954952000 | 7.257741000 |
| H  | 8.625387000 | 7.653601000 | 7.881583000 |
| H  | 7.413216000 | 7.549100000 | 6.585456000 |
| H  | 8.755910000 | 6.384206000 | 6.637725000 |

|   |             |              |              |
|---|-------------|--------------|--------------|
| C | 6.210548000 | 1.255476000  | 10.433656000 |
| H | 5.562436000 | 1.088483000  | 11.299791000 |
| C | 7.397474000 | 0.531101000  | 10.319011000 |
| C | 8.185057000 | 0.741711000  | 9.183552000  |
| H | 9.106072000 | 0.163235000  | 9.063360000  |
| C | 7.832461000 | 1.665562000  | 8.196671000  |
| C | 8.718143000 | 1.817036000  | 6.992046000  |
| H | 9.590581000 | 1.151653000  | 7.052242000  |
| H | 9.099768000 | 2.846707000  | 6.884952000  |
| H | 8.174793000 | 1.585690000  | 6.062576000  |
| C | 4.569929000 | 2.988114000  | 9.682612000  |
| H | 3.832926000 | 2.420400000  | 10.268849000 |
| H | 4.103807000 | 3.278923000  | 8.729575000  |
| H | 4.775816000 | 3.918472000  | 10.239555000 |
| C | 7.837817000 | -0.417100000 | 11.396587000 |
| H | 8.462750000 | -1.227557000 | 10.993965000 |
| H | 6.981114000 | -0.869400000 | 11.917590000 |
| H | 8.438281000 | 0.112232000  | 12.156128000 |

## 1A

E(PBE0-D3(BJ)/def2-QZVPP+SMD): -1970.677980 E<sub>h</sub>

E(TPSSh-D3(BJ)/def2-QZVPP+SMD): -1972.397863 E<sub>h</sub>

$\Delta\Delta G(298.15)$ : 0.594676

Lowest frequency: 22.47 cm<sup>-1</sup>

|    |             |             |             |
|----|-------------|-------------|-------------|
| C  | 5.690609000 | 5.550545000 | 6.280383000 |
| P  | 6.217524000 | 3.266574000 | 3.305181000 |
| N  | 6.763977000 | 5.159363000 | 7.142135000 |
| B  | 6.117815000 | 3.769879000 | 7.242689000 |
| Cl | 9.136006000 | 4.564104000 | 4.517720000 |
| C  | 5.289875000 | 6.918523000 | 5.863551000 |

|    |             |              |              |
|----|-------------|--------------|--------------|
| H  | 4.448915000 | 6.845752000  | 5.160969000  |
| H  | 6.113445000 | 7.455981000  | 5.374406000  |
| H  | 4.956076000 | 7.509551000  | 6.732627000  |
| C  | 5.033171000 | 4.279869000  | 6.271192000  |
| H  | 4.078209000 | 4.016527000  | 5.822799000  |
| Rh | 6.900498000 | 4.294591000  | 5.228365000  |
| C  | 7.050690000 | 6.403165000  | 9.207528000  |
| H  | 7.747110000 | 6.999857000  | 9.815778000  |
| H  | 6.718180000 | 5.544621000  | 9.810346000  |
| H  | 6.174077000 | 7.029869000  | 8.980739000  |
| C  | 8.885995000 | 4.976119000  | 8.262159000  |
| H  | 9.624058000 | 5.492977000  | 8.893331000  |
| H  | 9.378421000 | 4.644570000  | 7.336376000  |
| H  | 8.518922000 | 4.096333000  | 8.808572000  |
| C  | 7.739128000 | 5.926369000  | 7.926263000  |
| C  | 5.401304000 | 2.476627000  | 9.310329000  |
| C  | 6.330329000 | 2.585306000  | 8.244205000  |
| C  | 8.286061000 | 7.106542000  | 7.125684000  |
| H  | 9.112312000 | 7.569615000  | 7.684913000  |
| H  | 7.528221000 | 7.883920000  | 6.957594000  |
| H  | 8.676688000 | 6.756718000  | 6.158179000  |
| C  | 5.524206000 | 1.444096000  | 10.237526000 |
| H  | 4.804081000 | 1.379215000  | 11.060124000 |
| C  | 6.539721000 | 0.485491000  | 10.142207000 |
| C  | 7.438763000 | 0.594257000  | 9.085286000  |
| H  | 8.240004000 | -0.145624000 | 8.986391000  |
| C  | 7.355769000 | 1.626812000  | 8.142058000  |
| C  | 8.383061000 | 1.674631000  | 7.048814000  |
| H  | 9.382167000 | 1.910743000  | 7.448197000  |
| H  | 8.148187000 | 2.446150000  | 6.299346000  |
| H  | 8.459702000 | 0.705686000  | 6.531381000  |

|   |             |              |              |
|---|-------------|--------------|--------------|
| C | 4.273399000 | 3.462058000  | 9.452581000  |
| H | 3.712273000 | 3.292505000  | 10.382540000 |
| H | 3.568724000 | 3.384690000  | 8.609665000  |
| H | 4.634001000 | 4.502294000  | 9.459625000  |
| C | 6.644835000 | -0.620381000 | 11.151560000 |
| H | 7.496551000 | -1.281412000 | 10.937745000 |
| H | 5.732036000 | -1.238148000 | 11.164107000 |
| H | 6.775026000 | -0.220018000 | 12.169754000 |
| C | 4.948647000 | 1.941256000  | 3.626345000  |
| H | 4.103831000 | 2.545058000  | 3.999912000  |
| C | 5.351223000 | 1.005745000  | 4.762669000  |
| H | 4.495436000 | 0.371184000  | 5.043243000  |
| H | 5.665559000 | 1.564108000  | 5.655054000  |
| H | 6.176175000 | 0.338984000  | 4.476741000  |
| C | 4.484311000 | 1.178228000  | 2.392366000  |
| H | 3.609781000 | 0.555566000  | 2.641468000  |
| H | 5.268298000 | 0.500127000  | 2.023664000  |
| H | 4.193525000 | 1.843110000  | 1.565157000  |
| C | 7.617949000 | 2.582802000  | 2.282390000  |
| H | 8.344014000 | 3.408565000  | 2.380574000  |
| C | 8.259888000 | 1.375852000  | 2.957847000  |
| H | 9.232031000 | 1.162924000  | 2.486642000  |
| H | 7.640806000 | 0.470467000  | 2.859630000  |
| H | 8.448903000 | 1.564113000  | 4.024181000  |
| C | 7.353730000 | 2.335236000  | 0.802162000  |
| H | 8.293941000 | 2.024383000  | 0.318320000  |
| H | 7.007787000 | 3.235842000  | 0.274993000  |
| H | 6.619045000 | 1.536082000  | 0.627986000  |
| C | 5.367049000 | 4.444962000  | 2.139996000  |
| H | 5.222535000 | 3.902809000  | 1.189913000  |
| C | 6.277253000 | 5.644332000  | 1.894089000  |

|   |             |             |             |
|---|-------------|-------------|-------------|
| H | 5.825437000 | 6.320025000 | 1.149915000 |
| H | 7.272330000 | 5.353186000 | 1.528839000 |
| H | 6.430681000 | 6.208202000 | 2.827468000 |
| C | 4.001574000 | 4.883828000 | 2.652391000 |
| H | 3.579095000 | 5.652269000 | 1.985573000 |
| H | 4.082154000 | 5.322563000 | 3.658259000 |
| H | 3.280352000 | 4.054288000 | 2.697940000 |

### 1AB

E(PBE0-D3(BJ)/def2-QZVPP+SMD): -2431.592893 E<sub>h</sub>

E(TPSSh-D3(BJ)/def2-QZVPP+SMD): -2433.632648 E<sub>h</sub>

$\Delta\Delta G(298.15)$ : 0.707554 E<sub>h</sub>

Lowest frequency: 14.03 cm<sup>-1</sup>

|    |             |             |              |
|----|-------------|-------------|--------------|
| C  | 5.731192000 | 5.660653000 | 6.654880000  |
| P  | 5.624512000 | 3.417937000 | 3.569625000  |
| N  | 6.921885000 | 5.180477000 | 7.285241000  |
| B  | 6.296834000 | 3.764695000 | 7.263703000  |
| Cl | 7.405339000 | 6.820017000 | 4.186429000  |
| C  | 5.239248000 | 7.053248000 | 6.510455000  |
| H  | 4.322757000 | 7.036443000 | 5.905861000  |
| H  | 5.972665000 | 7.698030000 | 6.009684000  |
| H  | 4.984440000 | 7.466859000 | 7.499452000  |
| C  | 5.088076000 | 4.418437000 | 6.538167000  |
| H  | 4.082413000 | 4.239525000 | 6.175050000  |
| Rh | 6.825442000 | 4.503803000 | 5.209892000  |
| C  | 6.931245000 | 6.110656000 | 9.531992000  |
| H  | 7.513065000 | 6.681586000 | 10.271231000 |
| H  | 6.661624000 | 5.142055000 | 9.978228000  |
| H  | 6.005765000 | 6.669624000 | 9.330125000  |
| C  | 8.967760000 | 5.050927000 | 8.591829000  |

|   |             |              |              |
|---|-------------|--------------|--------------|
| H | 9.579275000 | 5.561090000  | 9.349968000  |
| H | 9.586387000 | 4.888304000  | 7.703011000  |
| H | 8.659531000 | 4.078762000  | 8.997769000  |
| C | 7.755738000 | 5.908053000  | 8.254433000  |
| C | 5.374860000 | 2.323721000  | 9.178627000  |
| C | 6.437907000 | 2.549499000  | 8.262723000  |
| C | 8.213959000 | 7.257486000  | 7.698231000  |
| H | 9.020551000 | 7.659015000  | 8.328885000  |
| H | 7.401857000 | 7.996206000  | 7.692564000  |
| H | 8.573276000 | 7.158623000  | 6.664225000  |
| C | 5.409497000 | 1.224601000  | 10.038089000 |
| H | 4.574223000 | 1.071553000  | 10.729724000 |
| C | 6.462493000 | 0.306491000  | 10.028998000 |
| C | 7.518310000 | 0.546309000  | 9.152580000  |
| H | 8.366176000 | -0.146986000 | 9.131947000  |
| C | 7.522003000 | 1.645717000  | 8.286309000  |
| C | 8.701482000 | 1.830430000  | 7.380402000  |
| H | 9.549272000 | 2.290141000  | 7.914727000  |
| H | 8.432483000 | 2.490216000  | 6.543310000  |
| H | 9.055792000 | 0.866408000  | 6.984256000  |
| C | 4.172428000 | 3.225533000  | 9.252422000  |
| H | 3.561775000 | 2.990759000  | 10.136132000 |
| H | 3.532502000 | 3.107175000  | 8.364501000  |
| H | 4.455481000 | 4.287794000  | 9.299590000  |
| C | 6.421160000 | -0.921413000 | 10.890287000 |
| H | 7.427388000 | -1.246498000 | 11.193041000 |
| H | 5.957960000 | -1.760573000 | 10.343837000 |
| H | 5.825415000 | -0.756819000 | 11.800091000 |
| C | 4.132387000 | 2.476267000  | 4.222001000  |
| H | 3.522951000 | 3.300987000  | 4.619330000  |
| C | 4.451258000 | 1.532947000  | 5.379489000  |

|   |             |             |             |
|---|-------------|-------------|-------------|
| H | 3.546115000 | 1.354701000 | 5.981357000 |
| H | 5.225925000 | 1.928976000 | 6.047677000 |
| H | 4.794146000 | 0.555597000 | 5.016067000 |
| C | 3.286899000 | 1.767405000 | 3.170331000 |
| H | 2.350248000 | 1.416642000 | 3.632428000 |
| H | 3.795652000 | 0.876861000 | 2.774769000 |
| H | 3.014143000 | 2.411804000 | 2.323465000 |
| C | 6.484872000 | 2.192971000 | 2.431471000 |
| H | 7.445885000 | 2.694721000 | 2.246398000 |
| C | 6.778642000 | 0.886094000 | 3.161699000 |
| H | 7.540048000 | 0.307004000 | 2.614869000 |
| H | 5.879971000 | 0.257024000 | 3.222551000 |
| H | 7.141147000 | 1.056053000 | 4.185990000 |
| C | 5.868597000 | 1.915485000 | 1.058835000 |
| H | 6.590386000 | 1.339417000 | 0.456360000 |
| H | 5.632634000 | 2.827017000 | 0.495909000 |
| H | 4.951448000 | 1.316023000 | 1.121574000 |
| C | 4.832377000 | 4.629285000 | 2.388502000 |
| H | 4.144989000 | 4.034010000 | 1.762656000 |
| C | 5.848935000 | 5.330711000 | 1.493499000 |
| H | 5.315579000 | 5.988010000 | 0.787284000 |
| H | 6.461678000 | 4.639969000 | 0.897094000 |
| H | 6.516821000 | 5.956658000 | 2.105294000 |
| C | 4.029531000 | 5.669991000 | 3.161019000 |
| H | 3.501156000 | 6.331999000 | 2.456029000 |
| H | 4.714016000 | 6.288232000 | 3.761998000 |
| H | 3.272437000 | 5.222366000 | 3.822266000 |
| P | 8.947906000 | 4.039303000 | 4.246909000 |
| C | 9.684363000 | 2.362511000 | 4.024706000 |
| H | 9.105364000 | 1.789730000 | 3.292148000 |
| H | 9.695061000 | 1.804763000 | 4.968225000 |



|   |              |             |             |
|---|--------------|-------------|-------------|
| H | 10.714965000 | 2.461090000 | 3.648788000 |
| C | 9.227264000  | 4.683036000 | 2.548556000 |
| H | 10.268760000 | 4.483510000 | 2.253476000 |
| H | 9.016732000  | 5.760241000 | 2.556163000 |
| H | 8.555884000  | 4.203126000 | 1.826546000 |
| C | 10.314798000 | 4.872396000 | 5.140130000 |
| H | 11.227887000 | 4.871445000 | 4.525723000 |
| H | 10.519966000 | 4.346013000 | 6.081027000 |
| H | 10.011934000 | 5.905499000 | 5.354562000 |

## 1B

E(PBE0-D3(BJ)/def2-QZVPP+SMD): -1734.977790 E<sub>h</sub>

E(TPSSh-D3(BJ)/def2-QZVPP+SMD): -1736.376795 E<sub>h</sub>

$\Delta\Delta G(298.15)$ : 0.430267 E<sub>h</sub>

Lowest frequency: 21.80 cm<sup>-1</sup>

|    |             |             |             |
|----|-------------|-------------|-------------|
| C  | 5.186104000 | 5.153661000 | 6.382249000 |
| P  | 6.265739000 | 3.379713000 | 3.329574000 |
| N  | 6.288837000 | 5.019677000 | 7.305334000 |
| B  | 5.997841000 | 3.519592000 | 7.378142000 |
| Cl | 8.904282000 | 4.614362000 | 4.701803000 |
| C  | 4.477608000 | 6.377309000 | 5.931301000 |
| H  | 3.818005000 | 6.104841000 | 5.095596000 |
| H  | 5.173793000 | 7.152323000 | 5.584724000 |
| H  | 3.851348000 | 6.800849000 | 6.733113000 |
| C  | 4.853911000 | 3.762265000 | 6.360593000 |
| H  | 4.015659000 | 3.270773000 | 5.871655000 |
| Rh | 6.668515000 | 4.236088000 | 5.369109000 |
| C  | 6.129210000 | 6.751488000 | 9.029043000 |
| H  | 6.713268000 | 7.439793000 | 9.659075000 |
| H  | 5.603061000 | 6.045857000 | 9.687281000 |

|   |             |              |              |
|---|-------------|--------------|--------------|
| H | 5.379296000 | 7.349798000  | 8.490812000  |
| C | 8.136553000 | 5.261732000  | 8.826393000  |
| H | 8.779599000 | 5.971718000  | 9.367738000  |
| H | 8.763837000 | 4.683009000  | 8.132657000  |
| H | 7.695887000 | 4.563777000  | 9.551234000  |
| C | 7.060459000 | 6.021390000  | 8.057989000  |
| C | 6.030215000 | 2.349635000  | 9.640015000  |
| C | 6.556172000 | 2.405922000  | 8.331811000  |
| C | 7.727792000 | 7.021984000  | 7.117055000  |
| H | 8.325453000 | 7.734808000  | 7.705990000  |
| H | 6.992627000 | 7.601738000  | 6.541022000  |
| H | 8.388165000 | 6.502034000  | 6.407496000  |
| C | 6.511958000 | 1.409469000  | 10.553461000 |
| H | 6.085426000 | 1.383068000  | 11.561239000 |
| C | 7.516703000 | 0.504630000  | 10.211524000 |
| C | 8.006492000 | 0.541576000  | 8.904267000  |
| H | 8.772597000 | -0.180069000 | 8.603493000  |
| C | 7.542475000 | 1.463462000  | 7.960681000  |
| C | 8.093637000 | 1.406091000  | 6.565320000  |
| H | 8.798127000 | 0.570023000  | 6.447875000  |
| H | 8.615159000 | 2.333201000  | 6.278441000  |
| H | 7.280034000 | 1.269985000  | 5.835505000  |
| C | 4.957220000 | 3.301408000  | 10.093864000 |
| H | 4.209044000 | 2.785956000  | 10.715296000 |
| H | 4.431467000 | 3.766111000  | 9.246546000  |
| H | 5.381408000 | 4.113491000  | 10.708665000 |
| C | 8.051397000 | -0.464270000 | 11.225942000 |
| H | 8.669806000 | -1.243235000 | 10.757648000 |
| H | 7.238336000 | -0.960486000 | 11.778930000 |
| H | 8.676361000 | 0.055802000  | 11.971538000 |
| C | 4.579516000 | 2.761888000  | 2.975173000  |

|   |             |             |             |
|---|-------------|-------------|-------------|
| H | 3.860779000 | 3.586542000 | 3.083489000 |
| C | 7.341210000 | 1.973226000 | 2.889722000 |
| H | 8.378364000 | 2.284826000 | 3.084402000 |
| C | 6.554414000 | 4.583891000 | 1.988097000 |
| H | 6.360419000 | 4.136078000 | 1.000703000 |
| H | 4.319841000 | 1.974066000 | 3.695639000 |
| H | 4.513534000 | 2.353390000 | 1.954675000 |
| H | 7.219175000 | 1.674782000 | 1.837174000 |
| H | 7.106941000 | 1.119519000 | 3.540149000 |
| H | 5.900601000 | 5.454556000 | 2.136139000 |
| H | 7.598607000 | 4.921704000 | 2.058998000 |

## 1B<sub>2</sub>

E(PBE0-D3(BJ)/def2-QZVPP+SMD): -2195.906039 E<sub>h</sub>

E(TPSSh-D3(BJ)/def2-QZVPP+SMD): -2197.623329 E<sub>h</sub>

$\Delta\Delta G(298.15)$ : 0.540329 E<sub>h</sub>

Lowest frequency: 3.95 cm<sup>-1</sup>

|    |             |             |             |
|----|-------------|-------------|-------------|
| C  | 5.501126000 | 5.241629000 | 6.522311000 |
| P  | 5.656673000 | 4.190789000 | 3.284065000 |
| N  | 6.694891000 | 4.972001000 | 7.314360000 |
| B  | 6.322207000 | 3.505506000 | 7.325174000 |
| Cl | 7.764252000 | 6.679023000 | 4.420237000 |
| C  | 4.723706000 | 6.504547000 | 6.424172000 |
| H  | 3.877871000 | 6.335853000 | 5.743598000 |
| H  | 5.334934000 | 7.322296000 | 6.019201000 |
| H  | 4.303842000 | 6.812057000 | 7.397347000 |
| C  | 5.161240000 | 3.842931000 | 6.393371000 |
| H  | 4.263149000 | 3.393380000 | 5.981778000 |
| Rh | 6.818544000 | 4.522058000 | 5.182325000 |
| C  | 6.750603000 | 5.656271000 | 9.649336000 |

|   |             |              |              |
|---|-------------|--------------|--------------|
| H | 7.276717000 | 6.264001000  | 10.400727000 |
| H | 6.764891000 | 4.608155000  | 9.981998000  |
| H | 5.704893000 | 5.997855000  | 9.612573000  |
| C | 8.857184000 | 5.301066000  | 8.355355000  |
| H | 9.428565000 | 5.897806000  | 9.080136000  |
| H | 9.342360000 | 5.386026000  | 7.373606000  |
| H | 8.885775000 | 4.254262000  | 8.684249000  |
| C | 7.423001000 | 5.811450000  | 8.280578000  |
| C | 5.595693000 | 2.111349000  | 9.315847000  |
| C | 6.635308000 | 2.381194000  | 8.381439000  |
| C | 7.437399000 | 7.281438000  | 7.872285000  |
| H | 8.123864000 | 7.828674000  | 8.534566000  |
| H | 6.448293000 | 7.746536000  | 7.977948000  |
| H | 7.774805000 | 7.395851000  | 6.831972000  |
| C | 5.805471000 | 1.193621000  | 10.342491000 |
| H | 4.999364000 | 1.009459000  | 11.060224000 |
| C | 7.009336000 | 0.496287000  | 10.483207000 |
| C | 8.015371000 | 0.750933000  | 9.556792000  |
| H | 8.967937000 | 0.218271000  | 9.639805000  |
| C | 7.846306000 | 1.679160000  | 8.521050000  |
| C | 8.980615000 | 1.886165000  | 7.562285000  |
| H | 9.874116000 | 2.287506000  | 8.067220000  |
| H | 8.689685000 | 2.588880000  | 6.771497000  |
| H | 9.282718000 | 0.934738000  | 7.096211000  |
| C | 4.251636000 | 2.785137000  | 9.239988000  |
| H | 3.627771000 | 2.508991000  | 10.102546000 |
| H | 3.710572000 | 2.490230000  | 8.328316000  |
| H | 4.334905000 | 3.882341000  | 9.215299000  |
| C | 7.171530000 | -0.513881000 | 11.579274000 |
| H | 8.225981000 | -0.771529000 | 11.751526000 |
| H | 6.639666000 | -1.447353000 | 11.329465000 |

|   |              |              |              |
|---|--------------|--------------|--------------|
| H | 6.747980000  | -0.144142000 | 12.525530000 |
| C | 3.829787000  | 4.209009000  | 3.465815000  |
| H | 3.512548000  | 5.140136000  | 3.954802000  |
| C | 5.840944000  | 2.603172000  | 2.375790000  |
| H | 6.855835000  | 2.498465000  | 1.970849000  |
| C | 5.860541000  | 5.449319000  | 1.976963000  |
| H | 5.220363000  | 5.217159000  | 1.112390000  |
| P | 8.828175000  | 3.611866000  | 4.226386000  |
| C | 9.080503000  | 1.808214000  | 3.958185000  |
| H | 8.318975000  | 1.442132000  | 3.256984000  |
| H | 8.959732000  | 1.260260000  | 4.900239000  |
| H | 10.075545000 | 1.598158000  | 3.533741000  |
| C | 9.206994000  | 4.229033000  | 2.533180000  |
| H | 10.231244000 | 3.948668000  | 2.243135000  |
| H | 9.101517000  | 5.323659000  | 2.550667000  |
| H | 8.511260000  | 3.809302000  | 1.794907000  |
| C | 10.386391000 | 4.130738000  | 5.049341000  |
| H | 11.263441000 | 3.788200000  | 4.479068000  |
| H | 10.444924000 | 3.742221000  | 6.073687000  |
| H | 10.370452000 | 5.230404000  | 5.085553000  |
| H | 5.659089000  | 1.775152000  | 3.076119000  |
| H | 5.125548000  | 2.542685000  | 1.541556000  |
| H | 6.909826000  | 5.512000000  | 1.666386000  |
| H | 5.594888000  | 6.425841000  | 2.404112000  |
| H | 3.354249000  | 4.143674000  | 2.475416000  |
| H | 3.496360000  | 3.360925000  | 4.077122000  |

2

E(PBE0-D3(BJ)/def2-QZVPP+SMD): -1273.963495 E<sub>h</sub>

E(TPSSh-D3(BJ)/def2-QZVPP+SMD): -1275.045605 E<sub>h</sub>

$\Delta\Delta G(298.15)$ : 0.321487 E<sub>h</sub>

Lowest frequency: 24.57 cm<sup>-1</sup>

|    |             |              |              |
|----|-------------|--------------|--------------|
| Rh | 2.064469000 | 11.928019000 | 10.953095000 |
| N  | 4.677752000 | 10.720421000 | 10.774376000 |
| B  | 3.289232000 | 10.392170000 | 10.749865000 |
| C  | 3.676224000 | 12.811803000 | 10.451246000 |
| H  | 3.639612000 | 13.864310000 | 10.137524000 |
| C  | 4.813787000 | 12.072146000 | 10.378204000 |
| C  | 6.053520000 | 12.571359000 | 9.702429000  |
| H  | 6.273802000 | 11.979574000 | 8.799812000  |
| H  | 6.945872000 | 12.530473000 | 10.344295000 |
| H  | 5.908207000 | 13.614842000 | 9.393063000  |
| C  | 5.155272000 | 8.642287000  | 11.934799000 |
| H  | 4.650980000 | 8.033816000  | 11.170609000 |
| H  | 4.422097000 | 8.907598000  | 12.710587000 |
| H  | 5.941133000 | 8.031412000  | 12.401914000 |
| Cl | 2.159993000 | 12.026189000 | 13.186308000 |
| C  | 5.773894000 | 9.901030000  | 11.329581000 |
| C  | 6.779445000 | 9.471195000  | 10.257989000 |
| H  | 6.272723000 | 8.902703000  | 9.463192000  |
| H  | 7.542735000 | 8.817833000  | 10.707971000 |
| H  | 7.300650000 | 10.319177000 | 9.797143000  |
| C  | 6.463557000 | 10.679813000 | 12.456801000 |
| H  | 7.204187000 | 10.041327000 | 12.962162000 |
| H  | 5.719210000 | 11.010352000 | 13.194958000 |
| H  | 6.991819000 | 11.568913000 | 12.088585000 |
| C  | 2.441310000 | 9.189313000  | 10.228233000 |
| C  | 1.568298000 | 8.416480000  | 11.029004000 |

|   |              |              |              |
|---|--------------|--------------|--------------|
| C | 0.698224000  | 7.508204000  | 10.417446000 |
| H | 0.025074000  | 6.919549000  | 11.048318000 |
| C | 0.658122000  | 7.333468000  | 9.035430000  |
| C | 1.541148000  | 8.086206000  | 8.254678000  |
| H | 1.535700000  | 7.962750000  | 7.166728000  |
| C | 2.424612000  | 9.000768000  | 8.819752000  |
| C | 1.590257000  | 8.505980000  | 12.525155000 |
| H | 2.380081000  | 7.857600000  | 12.937969000 |
| H | 0.639264000  | 8.166508000  | 12.959709000 |
| H | 1.790012000  | 9.527781000  | 12.884272000 |
| C | -0.306403000 | 6.385393000  | 8.389576000  |
| H | 0.217953000  | 5.676399000  | 7.729194000  |
| H | -1.033010000 | 6.932534000  | 7.766152000  |
| H | -0.872228000 | 5.806093000  | 9.133337000  |
| C | 3.332323000  | 9.790628000  | 7.921852000  |
| H | 3.212476000  | 10.878170000 | 8.071261000  |
| H | 3.126157000  | 9.571848000  | 6.864234000  |
| H | 4.390839000  | 9.561539000  | 8.121802000  |

## 2A

E(PBE0-D3(BJ)/def2-QZVPP+SMD): -1970.646038 E<sub>h</sub>

E(TPSSh-D3(BJ)/def2-QZVPP+SMD): -1972.365675 E<sub>h</sub>

$\Delta\Delta G(298.15)$ : 0.595201 E<sub>h</sub>

Lowest frequency: 14.83 cm<sup>-1</sup>

|    |             |              |              |
|----|-------------|--------------|--------------|
| Rh | 2.436951000 | 12.497162000 | 10.795465000 |
| N  | 4.533205000 | 10.591039000 | 10.461436000 |
| B  | 3.104330000 | 10.664911000 | 10.372426000 |
| C  | 4.249822000 | 12.894518000 | 10.200643000 |
| H  | 4.545756000 | 13.895112000 | 9.870071000  |
| C  | 5.109171000 | 11.857791000 | 10.175428000 |

|    |              |              |              |
|----|--------------|--------------|--------------|
| C  | 6.503053000  | 11.985449000 | 9.638970000  |
| H  | 6.614074000  | 11.416523000 | 8.700381000  |
| H  | 7.277702000  | 11.624774000 | 10.330923000 |
| H  | 6.715526000  | 13.041403000 | 9.420435000  |
| C  | 4.373710000  | 8.444434000  | 11.692573000 |
| H  | 3.851335000  | 7.886266000  | 10.906583000 |
| H  | 3.625156000  | 8.887587000  | 12.365294000 |
| H  | 4.971537000  | 7.730716000  | 12.278643000 |
| Cl | 2.926824000  | 12.349073000 | 13.051851000 |
| C  | 5.309297000  | 9.515231000  | 11.132888000 |
| C  | 6.284330000  | 8.818296000  | 10.177894000 |
| H  | 5.734230000  | 8.323041000  | 9.364761000  |
| H  | 6.845706000  | 8.044935000  | 10.724532000 |
| H  | 7.013623000  | 9.502885000  | 9.729580000  |
| C  | 6.040923000  | 10.120085000 | 12.339915000 |
| H  | 6.549689000  | 9.323130000  | 12.904052000 |
| H  | 5.314950000  | 10.618402000 | 12.997774000 |
| H  | 6.795889000  | 10.863647000 | 12.056334000 |
| C  | 2.172482000  | 9.468061000  | 9.966428000  |
| C  | 1.166216000  | 8.926158000  | 10.801142000 |
| C  | 0.537846000  | 7.736124000  | 10.436506000 |
| H  | -0.206492000 | 7.300247000  | 11.110728000 |
| C  | 0.855359000  | 7.064168000  | 9.249297000  |
| C  | 1.771147000  | 7.663264000  | 8.386868000  |
| H  | 2.009796000  | 7.177783000  | 7.434695000  |
| C  | 2.428956000  | 8.851411000  | 8.723358000  |
| C  | 0.768416000  | 9.606918000  | 12.080346000 |
| H  | 1.626331000  | 10.019325000 | 12.629833000 |
| H  | 0.214210000  | 8.927238000  | 12.743096000 |
| H  | 0.107176000  | 10.466552000 | 11.873389000 |
| C  | 0.273875000  | 5.714588000  | 8.945365000  |



|   |              |              |              |
|---|--------------|--------------|--------------|
| H | 0.368999000  | 5.461993000  | 7.879265000  |
| H | -0.787838000 | 5.648379000  | 9.228820000  |
| H | 0.806263000  | 4.934583000  | 9.513979000  |
| C | 3.407000000  | 9.418766000  | 7.728030000  |
| H | 2.946595000  | 9.466121000  | 6.727651000  |
| H | 4.301356000  | 8.782527000  | 7.637459000  |
| H | 3.754275000  | 10.423578000 | 8.000402000  |
| P | 1.386061000  | 13.118458000 | 8.874864000  |
| C | 0.013521000  | 14.155198000 | 9.622196000  |
| H | 0.601121000  | 14.987826000 | 10.046530000 |
| C | -0.659007000 | 13.461142000 | 10.808664000 |
| H | -1.281583000 | 14.185905000 | 11.358297000 |
| H | 0.071616000  | 13.068173000 | 11.538288000 |
| H | -1.308507000 | 12.631449000 | 10.498513000 |
| C | -1.003917000 | 14.749077000 | 8.658768000  |
| H | -1.661032000 | 15.451004000 | 9.198623000  |
| H | -1.647685000 | 13.973975000 | 8.218459000  |
| H | -0.531348000 | 15.307322000 | 7.836772000  |
| C | 0.636192000  | 11.841889000 | 7.734606000  |
| H | 1.480924000  | 11.150236000 | 7.592208000  |
| C | -0.476611000 | 11.057331000 | 8.419730000  |
| H | -0.695776000 | 10.145082000 | 7.843361000  |
| H | -1.404053000 | 11.646136000 | 8.476865000  |
| C | 0.185969000  | 12.335420000 | 6.360421000  |
| H | -0.221809000 | 11.485181000 | 5.789742000  |
| H | 1.006208000  | 12.761531000 | 5.766367000  |
| H | -0.611377000 | 13.089937000 | 6.427709000  |
| C | 2.221497000  | 14.306845000 | 7.708552000  |
| H | 1.469439000  | 14.542824000 | 6.936982000  |
| C | 3.410287000  | 13.631140000 | 7.026063000  |
| H | 3.879085000  | 14.321690000 | 6.306336000  |

|   |              |              |             |
|---|--------------|--------------|-------------|
| H | 3.110792000  | 12.729807000 | 6.470279000 |
| H | 4.167564000  | 13.328860000 | 7.761677000 |
| C | 2.603742000  | 15.610257000 | 8.406585000 |
| H | 3.217259000  | 16.230174000 | 7.733946000 |
| H | 3.187494000  | 15.435564000 | 9.322886000 |
| H | 1.721038000  | 16.205852000 | 8.681617000 |
| H | -0.195216000 | 10.733102000 | 9.429758000 |

## 2AB

E(PBE0-D3(BJ)/def2-QZVPP+SMD): -2431.593403 E<sub>h</sub>

E(TPSSH-D3(BJ)/def2-QZVPP+SMD): -2433.630659 E<sub>h</sub>

$\Delta\Delta G(298.15)$ : 0.706085 E<sub>h</sub>

Lowest frequency: 19.73 cm<sup>-1</sup>

|    |              |              |              |
|----|--------------|--------------|--------------|
| Rh | 2.266240000  | 12.543397000 | 11.304706000 |
| P  | 2.891304000  | 12.792442000 | 13.599408000 |
| N  | 4.609060000  | 10.863660000 | 10.614218000 |
| B  | 3.175162000  | 10.834559000 | 10.749344000 |
| C  | 4.090523000  | 13.130862000 | 10.769811000 |
| H  | 4.304990000  | 14.182978000 | 10.532002000 |
| C  | 5.041945000  | 12.219953000 | 10.476090000 |
| P  | 1.452154000  | 13.123316000 | 9.227290000  |
| C  | 6.330174000  | 12.612380000 | 9.808034000  |
| H  | 6.303596000  | 12.407842000 | 8.723089000  |
| H  | 7.230140000  | 12.118005000 | 10.196437000 |
| H  | 6.467207000  | 13.695815000 | 9.936664000  |
| C  | 4.889315000  | 8.406930000  | 11.052052000 |
| H  | 4.236747000  | 8.017154000  | 10.262258000 |
| H  | 4.292838000  | 8.502512000  | 11.968294000 |
| H  | 5.675853000  | 7.662359000  | 11.244491000 |
| Cl | -0.100395000 | 12.085512000 | 11.741510000 |

|   |              |              |              |
|---|--------------|--------------|--------------|
| C | 5.568309000  | 9.726889000  | 10.663449000 |
| C | 6.250010000  | 9.476254000  | 9.308176000  |
| H | 5.510711000  | 9.172600000  | 8.556489000  |
| H | 6.977168000  | 8.656173000  | 9.408832000  |
| H | 6.788192000  | 10.349939000 | 8.925520000  |
| C | 6.619735000  | 10.001250000 | 11.749191000 |
| H | 7.393874000  | 9.219560000  | 11.728563000 |
| H | 6.148890000  | 9.987177000  | 12.739982000 |
| H | 7.122410000  | 10.968264000 | 11.636154000 |
| C | 2.295903000  | 9.593060000  | 10.312530000 |
| C | 1.528383000  | 8.804774000  | 11.200205000 |
| C | 1.002015000  | 7.583692000  | 10.775304000 |
| H | 0.446701000  | 6.974059000  | 11.496428000 |
| C | 1.198815000  | 7.096692000  | 9.482456000  |
| C | 1.876082000  | 7.921197000  | 8.584267000  |
| H | 2.031379000  | 7.580016000  | 7.555602000  |
| C | 2.405635000  | 9.156194000  | 8.968273000  |
| C | 1.298398000  | 9.188774000  | 12.631099000 |
| H | 1.674569000  | 10.195014000 | 12.834641000 |
| H | 1.779379000  | 8.475222000  | 13.319560000 |
| H | 0.221252000  | 9.201075000  | 12.854884000 |
| C | 0.731821000  | 5.721951000  | 9.100188000  |
| H | 0.917815000  | 5.510836000  | 8.037376000  |
| H | -0.343280000 | 5.584815000  | 9.298902000  |
| H | 1.264105000  | 4.958026000  | 9.688772000  |
| C | 3.085724000  | 9.972829000  | 7.902848000  |
| H | 2.341744000  | 10.480379000 | 7.266394000  |
| H | 3.683243000  | 9.337949000  | 7.231673000  |
| H | 3.745213000  | 10.738557000 | 8.327979000  |
| C | 4.347454000  | 11.822168000 | 14.241718000 |
| C | 1.408709000  | 12.457905000 | 14.695830000 |

|   |              |              |              |
|---|--------------|--------------|--------------|
| C | 3.384594000  | 14.593270000 | 13.862601000 |
| C | 2.594887000  | 13.596949000 | 7.878538000  |
| H | 3.136394000  | 12.716611000 | 7.511986000  |
| H | 3.332303000  | 14.312373000 | 8.266961000  |
| H | 2.037729000  | 14.056377000 | 7.047383000  |
| C | 0.165367000  | 12.122102000 | 8.409909000  |
| H | -0.201851000 | 12.627741000 | 7.503888000  |
| H | -0.642730000 | 11.992310000 | 9.141926000  |
| H | 0.553277000  | 11.127306000 | 8.157409000  |
| C | 0.572655000  | 14.707526000 | 9.525319000  |
| H | 0.157031000  | 15.111275000 | 8.588439000  |
| H | 1.267136000  | 15.440967000 | 9.960734000  |
| H | -0.235595000 | 14.509087000 | 10.242845000 |
| C | 0.326930000  | 13.531406000 | 14.555460000 |
| H | 0.482109000  | 14.368541000 | 15.250211000 |
| H | 0.247728000  | 13.919072000 | 13.532420000 |
| H | -0.651221000 | 13.082546000 | 14.787888000 |
| C | 1.645596000  | 12.129250000 | 16.164512000 |
| H | 2.048739000  | 12.986854000 | 16.722152000 |
| H | 0.682005000  | 11.862501000 | 16.628458000 |
| H | 2.320731000  | 11.276696000 | 16.312403000 |
| C | 3.171802000  | 15.160616000 | 15.267504000 |
| H | 3.549828000  | 16.196067000 | 15.298148000 |
| H | 2.116844000  | 15.187441000 | 15.558255000 |
| H | 3.716746000  | 14.597170000 | 16.034083000 |
| C | 4.812980000  | 14.880777000 | 13.398461000 |
| H | 5.558537000  | 14.453717000 | 14.082022000 |
| H | 5.013841000  | 14.480333000 | 12.397844000 |
| H | 4.978457000  | 15.969954000 | 13.385052000 |
| C | 4.052623000  | 10.329614000 | 14.251573000 |
| H | 4.944524000  | 9.773084000  | 14.580413000 |

|   |             |              |              |
|---|-------------|--------------|--------------|
| H | 3.236963000 | 10.069130000 | 14.940328000 |
| H | 3.776662000 | 9.968907000  | 13.256617000 |
| C | 4.957838000 | 12.246806000 | 15.577496000 |
| H | 5.854151000 | 11.636009000 | 15.770180000 |
| H | 5.276233000 | 13.295292000 | 15.599980000 |
| H | 4.270812000 | 12.086103000 | 16.418156000 |
| H | 0.998377000 | 11.564128000 | 14.197335000 |
| H | 2.699998000 | 15.124520000 | 13.177985000 |
| H | 5.082773000 | 12.011685000 | 13.438928000 |

## 2B

E(PBE0-D3(BJ)/def2-QZVPP+SMD): -1734.955494 E<sub>h</sub>

E(TPSSh-D3(BJ)/def2-QZVPP+SMD): -1736.353106 E<sub>h</sub>

$\Delta\Delta G(298.15)$ : 0.430947 E<sub>h</sub>

Lowest frequency: 23.89 cm<sup>-1</sup>

|    |             |              |              |
|----|-------------|--------------|--------------|
| Rh | 1.479586000 | 12.279071000 | 10.204398000 |
| N  | 4.186500000 | 11.066538000 | 10.411489000 |
| B  | 2.785159000 | 10.808456000 | 10.203629000 |
| C  | 3.006304000 | 12.808146000 | 11.371566000 |
| H  | 2.857481000 | 13.614957000 | 12.104354000 |
| C  | 4.198774000 | 12.164394000 | 11.315384000 |
| P  | 2.346766000 | 13.473697000 | 8.596333000  |
| C  | 5.354354000 | 12.479716000 | 12.212408000 |
| H  | 6.185461000 | 12.970273000 | 11.681583000 |
| H  | 5.765331000 | 11.583642000 | 12.703777000 |
| H  | 5.010573000 | 13.167891000 | 12.995917000 |
| C  | 4.935664000 | 9.572550000  | 8.660681000  |
| H  | 4.827272000 | 10.357695000 | 7.896447000  |
| H  | 3.997915000 | 9.004690000  | 8.719960000  |
| H  | 5.722822000 | 8.879641000  | 8.332700000  |

|    |              |              |              |
|----|--------------|--------------|--------------|
| Cl | -0.625356000 | 12.258422000 | 9.113947000  |
| C  | 5.301546000  | 10.183390000 | 10.017144000 |
| C  | 6.609525000  | 10.958021000 | 9.822037000  |
| H  | 6.456005000  | 11.849036000 | 9.195055000  |
| H  | 7.334958000  | 10.309436000 | 9.309100000  |
| H  | 7.066671000  | 11.273318000 | 10.766882000 |
| C  | 5.514637000  | 9.051303000  | 11.026079000 |
| H  | 6.343871000  | 8.400345000  | 10.708322000 |
| H  | 4.609164000  | 8.433660000  | 11.110899000 |
| H  | 5.762487000  | 9.445968000  | 12.022634000 |
| C  | 2.028503000  | 9.435382000  | 10.372733000 |
| C  | 1.998395000  | 8.857058000  | 11.665525000 |
| C  | 1.462901000  | 7.578122000  | 11.839655000 |
| H  | 1.460498000  | 7.140530000  | 12.843080000 |
| C  | 0.944332000  | 6.844137000  | 10.775269000 |
| C  | 0.893881000  | 7.461346000  | 9.522055000  |
| H  | 0.438946000  | 6.927234000  | 8.682572000  |
| C  | 1.403401000  | 8.741246000  | 9.305297000  |
| C  | 2.531501000  | 9.567874000  | 12.879778000 |
| H  | 3.615272000  | 9.408091000  | 12.997999000 |
| H  | 2.042757000  | 9.186752000  | 13.787459000 |
| H  | 2.371145000  | 10.655661000 | 12.833491000 |
| C  | 0.460305000  | 5.437494000  | 10.963713000 |
| H  | 1.053423000  | 4.736142000  | 10.356622000 |
| H  | -0.589372000 | 5.321531000  | 10.648957000 |
| H  | 0.544165000  | 5.122466000  | 12.013571000 |
| C  | 1.261583000  | 9.360526000  | 7.946214000  |
| H  | 0.624309000  | 10.257057000 | 8.010403000  |
| H  | 0.804505000  | 8.658373000  | 7.235798000  |
| H  | 2.232718000  | 9.671045000  | 7.532605000  |
| C  | 4.113440000  | 13.918525000 | 8.616899000  |

|   |             |              |             |
|---|-------------|--------------|-------------|
| H | 4.707617000 | 13.001059000 | 8.709424000 |
| H | 4.325400000 | 14.555249000 | 9.484395000 |
| H | 4.372376000 | 14.446409000 | 7.686961000 |
| C | 2.124938000 | 12.760563000 | 6.931800000 |
| H | 2.467373000 | 13.472846000 | 6.165304000 |
| H | 1.058029000 | 12.532067000 | 6.801618000 |
| H | 2.700906000 | 11.829483000 | 6.849180000 |
| C | 1.496076000 | 15.083708000 | 8.476229000 |
| H | 1.913585000 | 15.682364000 | 7.652200000 |
| H | 1.613584000 | 15.627464000 | 9.424204000 |
| H | 0.427460000 | 14.886823000 | 8.311083000 |

## 2B<sub>2</sub>

E(PBE0-D3(BJ)/def2-QZVPP+SMD): -2195.921711 E<sub>h</sub>

E(TPSSh-D3(BJ)/def2-QZVPP+SMD): -2197.636540 E<sub>h</sub>

$\Delta\Delta G(298.15)$ : 0.540769 E<sub>h</sub>

Lowest frequency: 27.66 cm<sup>-1</sup>

|    |             |              |              |
|----|-------------|--------------|--------------|
| Rh | 2.220995000 | 12.563237000 | 11.218253000 |
| P  | 2.799338000 | 12.624172000 | 13.443408000 |
| N  | 4.605215000 | 10.830256000 | 10.817131000 |
| B  | 3.165925000 | 10.852440000 | 10.786368000 |
| C  | 4.112192000 | 13.099281000 | 10.869130000 |
| H  | 4.373772000 | 14.157412000 | 10.713076000 |
| C  | 5.084900000 | 12.173083000 | 10.729569000 |
| P  | 1.511611000 | 13.258216000 | 9.121689000  |
| C  | 6.479485000 | 12.543603000 | 10.306837000 |
| H  | 6.643983000 | 12.353547000 | 9.232165000  |
| H  | 7.284179000 | 12.024434000 | 10.842738000 |
| H  | 6.612271000 | 13.621705000 | 10.475107000 |
| C  | 4.722479000 | 8.361861000  | 11.217472000 |

|    |              |              |              |
|----|--------------|--------------|--------------|
| H  | 4.130578000  | 8.019121000  | 10.361370000 |
| H  | 4.050288000  | 8.477944000  | 12.079509000 |
| H  | 5.449912000  | 7.575182000  | 11.466631000 |
| Cl | -0.147991000 | 12.559231000 | 11.803166000 |
| C  | 5.502115000  | 9.652541000  | 10.938184000 |
| C  | 6.307785000  | 9.426287000  | 9.650643000  |
| H  | 5.629882000  | 9.308919000  | 8.794740000  |
| H  | 6.900211000  | 8.502836000  | 9.737632000  |
| H  | 7.002907000  | 10.243847000 | 9.427263000  |
| C  | 6.438892000  | 9.816519000  | 12.145152000 |
| H  | 7.211506000  | 9.033357000  | 12.125194000 |
| H  | 5.870505000  | 9.704681000  | 13.078448000 |
| H  | 6.950202000  | 10.784456000 | 12.182611000 |
| C  | 2.272236000  | 9.654046000  | 10.283279000 |
| C  | 1.446474000  | 8.887193000  | 11.139470000 |
| C  | 0.893200000  | 7.692757000  | 10.681639000 |
| H  | 0.294797000  | 7.088965000  | 11.371534000 |
| C  | 1.124159000  | 7.214440000  | 9.386734000  |
| C  | 1.864339000  | 8.019934000  | 8.523650000  |
| H  | 2.053890000  | 7.679366000  | 7.500527000  |
| C  | 2.422378000  | 9.232244000  | 8.943902000  |
| C  | 1.191533000  | 9.318101000  | 12.551439000 |
| H  | 2.132478000  | 9.583787000  | 13.060030000 |
| H  | 0.698628000  | 8.527913000  | 13.135150000 |
| H  | 0.556714000  | 10.219518000 | 12.563710000 |
| C  | 0.633490000  | 5.856550000  | 8.974070000  |
| H  | 0.840476000  | 5.656053000  | 7.913001000  |
| H  | -0.448839000 | 5.740788000  | 9.144970000  |
| H  | 1.135002000  | 5.072273000  | 9.563308000  |
| C  | 3.194769000  | 10.037952000 | 7.935782000  |
| H  | 2.508808000  | 10.550392000 | 7.240312000  |



|   |              |              |              |
|---|--------------|--------------|--------------|
| H | 3.841732000  | 9.397527000  | 7.317008000  |
| H | 3.820102000  | 10.800909000 | 8.415862000  |
| C | 4.296173000  | 11.807539000 | 14.088544000 |
| H | 4.139658000  | 10.720630000 | 14.125639000 |
| H | 4.534093000  | 12.177775000 | 15.096762000 |
| H | 5.123153000  | 12.025340000 | 13.401357000 |
| C | 1.531028000  | 12.228596000 | 14.697166000 |
| H | 0.585776000  | 12.690959000 | 14.380807000 |
| H | 1.840004000  | 12.600389000 | 15.685595000 |
| H | 1.372239000  | 11.143133000 | 14.744833000 |
| C | 3.137958000  | 14.395406000 | 13.778886000 |
| H | 3.967857000  | 14.718722000 | 13.136371000 |
| H | 3.395675000  | 14.566941000 | 14.835713000 |
| H | 2.246562000  | 14.985708000 | 13.519507000 |
| C | 2.713160000  | 13.657882000 | 7.801089000  |
| H | 3.208498000  | 12.748821000 | 7.440128000  |
| H | 3.483024000  | 14.320074000 | 8.221014000  |
| H | 2.213924000  | 14.162351000 | 6.959399000  |
| C | 0.191499000  | 12.292473000 | 8.314191000  |
| H | -0.182960000 | 12.796948000 | 7.410385000  |
| H | -0.611665000 | 12.189779000 | 9.058438000  |
| H | 0.553634000  | 11.285802000 | 8.065172000  |
| C | 0.704467000  | 14.885744000 | 9.381947000  |
| H | 0.324485000  | 15.300444000 | 8.434715000  |
| H | 1.427015000  | 15.586426000 | 9.825541000  |
| H | -0.121408000 | 14.733615000 | 10.090965000 |

**1B<sub>2</sub>'**E(PBE0-D3(BJ)/def2-QZVPP+SMD): -2195.910206 E<sub>h</sub>E(TPSSh-D3(BJ)/def2-QZVPP+SMD): -2197.623433 E<sub>h</sub> $\Delta\Delta G(298)$ : 0.539615 E<sub>h</sub>Lowest frequency: 28.97 cm<sup>-1</sup>

|    |             |              |              |
|----|-------------|--------------|--------------|
| Rh | 2.278486000 | 12.595975000 | 11.353379000 |
| P  | 3.302804000 | 12.976231000 | 13.379147000 |
| N  | 4.658740000 | 10.666423000 | 11.524707000 |
| B  | 3.403011000 | 10.951729000 | 10.723133000 |
| C  | 4.054078000 | 12.493899000 | 10.345699000 |
| H  | 4.188281000 | 13.135494000 | 9.470128000  |
| C  | 5.122090000 | 11.680106000 | 10.690016000 |
| P  | 0.995722000 | 12.833413000 | 9.428226000  |
| C  | 6.494874000 | 11.813955000 | 10.115562000 |
| H  | 6.903847000 | 10.879445000 | 9.712075000  |
| H  | 7.177198000 | 12.156096000 | 10.911025000 |
| H  | 6.494860000 | 12.574351000 | 9.324037000  |
| C  | 4.356666000 | 8.571628000  | 12.684902000 |
| H  | 3.523136000 | 8.242125000  | 12.049815000 |
| H  | 3.946027000 | 9.135407000  | 13.533106000 |
| H  | 4.861004000 | 7.677482000  | 13.079532000 |
| Cl | 0.203808000 | 12.889471000 | 12.514084000 |
| C  | 5.343784000 | 9.418561000  | 11.883773000 |
| C  | 5.802517000 | 8.565981000  | 10.690340000 |
| H  | 4.956506000 | 8.322769000  | 10.033200000 |
| H  | 6.228180000 | 7.620663000  | 11.059497000 |
| H  | 6.585275000 | 9.055399000  | 10.096371000 |
| C  | 6.547035000 | 9.747108000  | 12.771667000 |
| H  | 7.036784000 | 8.821528000  | 13.110200000 |
| H  | 6.229416000 | 10.308751000 | 13.662573000 |
| H  | 7.300544000 | 10.342226000 | 12.236993000 |

|   |              |              |              |
|---|--------------|--------------|--------------|
| C | 2.665339000  | 9.869658000  | 9.832807000  |
| C | 1.552739000  | 9.194942000  | 10.388202000 |
| C | 0.846606000  | 8.260781000  | 9.618952000  |
| H | -0.008270000 | 7.747335000  | 10.071006000 |
| C | 1.196315000  | 7.969132000  | 8.301842000  |
| C | 2.315300000  | 8.618254000  | 7.771826000  |
| H | 2.635204000  | 8.378311000  | 6.752988000  |
| C | 3.053009000  | 9.549323000  | 8.508549000  |
| C | 1.057106000  | 9.481005000  | 11.778339000 |
| H | 1.851755000  | 9.836598000  | 12.446108000 |
| H | 0.595850000  | 8.586591000  | 12.224239000 |
| H | 0.305352000  | 10.286797000 | 11.774720000 |
| C | 0.390836000  | 7.015295000  | 7.466560000  |
| H | 1.035424000  | 6.390178000  | 6.828930000  |
| H | -0.293365000 | 7.563752000  | 6.796244000  |
| H | -0.224057000 | 6.348571000  | 8.088972000  |
| C | 4.263237000  | 10.171197000 | 7.865261000  |
| H | 4.463627000  | 9.717700000  | 6.884479000  |
| H | 5.159723000  | 10.031675000 | 8.483417000  |
| H | 4.145910000  | 11.256118000 | 7.722978000  |
| C | 5.101125000  | 13.320363000 | 13.463299000 |
| H | 5.666121000  | 12.413436000 | 13.220191000 |
| H | 5.380945000  | 13.669603000 | 14.468851000 |
| H | 5.347162000  | 14.097808000 | 12.727246000 |
| C | 3.047289000  | 11.743299000 | 14.701148000 |
| H | 1.971124000  | 11.524066000 | 14.752465000 |
| H | 3.406939000  | 12.106295000 | 15.676070000 |
| H | 3.582616000  | 10.824305000 | 14.431195000 |
| C | 2.635167000  | 14.510807000 | 14.130574000 |
| H | 2.827467000  | 15.351449000 | 13.447929000 |
| H | 3.106750000  | 14.713451000 | 15.104757000 |

|   |              |              |              |
|---|--------------|--------------|--------------|
| H | 1.547870000  | 14.396753000 | 14.237534000 |
| C | 1.728116000  | 12.766977000 | 7.750431000  |
| H | 2.007081000  | 11.730304000 | 7.518644000  |
| H | 2.624428000  | 13.400573000 | 7.699150000  |
| H | 0.999947000  | 13.119717000 | 7.003614000  |
| C | -0.490715000 | 11.792866000 | 9.231055000  |
| H | -1.117734000 | 12.155276000 | 8.402222000  |
| H | -1.051574000 | 11.834078000 | 10.175329000 |
| H | -0.182171000 | 10.754799000 | 9.039050000  |
| C | 0.298252000  | 14.526927000 | 9.462604000  |
| H | -0.373118000 | 14.705221000 | 8.608124000  |
| H | 1.118682000  | 15.259409000 | 9.446794000  |
| H | -0.253797000 | 14.640743000 | 10.406027000 |

### TS1

E(PBE0-D3(BJ)/def2-QZVPP+SMD): -2195.910206 E<sub>h</sub>

E(TPSSh-D3(BJ)/def2-QZVPP+SMD): -2197.623433 E<sub>h</sub>

$\Delta\Delta G(298)$ : 0.539615 E<sub>h</sub>

Lowest frequency: 163.04i cm<sup>-1</sup>

|    |             |              |              |
|----|-------------|--------------|--------------|
| Rh | 2.297302000 | 12.570398000 | 11.325936000 |
| P  | 3.260074000 | 12.934690000 | 13.374735000 |
| N  | 4.680521000 | 10.676438000 | 11.446450000 |
| B  | 3.345523000 | 10.890145000 | 10.841335000 |
| C  | 4.099517000 | 12.610072000 | 10.391946000 |
| H  | 4.254072000 | 13.345686000 | 9.593459000  |
| C  | 5.139300000 | 11.764058000 | 10.674206000 |
| P  | 1.059931000 | 12.850292000 | 9.361933000  |
| C  | 6.520307000 | 11.918816000 | 10.127578000 |
| H  | 6.885629000 | 11.024532000 | 9.603394000  |
| H  | 7.234145000 | 12.141162000 | 10.938025000 |

|    |              |              |              |
|----|--------------|--------------|--------------|
| H  | 6.540295000  | 12.763663000 | 9.426472000  |
| C  | 4.424825000  | 8.594533000  | 12.644514000 |
| H  | 3.604966000  | 8.233293000  | 12.008609000 |
| H  | 3.994320000  | 9.159408000  | 13.482221000 |
| H  | 4.949557000  | 7.719665000  | 13.054667000 |
| Cl | 0.179638000  | 12.823930000 | 12.444818000 |
| C  | 5.395631000  | 9.458424000  | 11.840920000 |
| C  | 5.889589000  | 8.604742000  | 10.663658000 |
| H  | 5.048218000  | 8.302210000  | 10.025394000 |
| H  | 6.370429000  | 7.691537000  | 11.045949000 |
| H  | 6.635128000  | 9.128868000  | 10.050958000 |
| C  | 6.580562000  | 9.820723000  | 12.740578000 |
| H  | 7.082843000  | 8.907239000  | 13.093509000 |
| H  | 6.240073000  | 10.381891000 | 13.623048000 |
| H  | 7.329865000  | 10.424871000 | 12.211135000 |
| C  | 2.581428000  | 9.819271000  | 9.956221000  |
| C  | 1.467066000  | 9.125600000  | 10.489160000 |
| C  | 0.761588000  | 8.219481000  | 9.687869000  |
| H  | -0.094873000 | 7.694181000  | 10.121629000 |
| C  | 1.110689000  | 7.969219000  | 8.361161000  |
| C  | 2.228434000  | 8.635167000  | 7.853983000  |
| H  | 2.548265000  | 8.432576000  | 6.826787000  |
| C  | 2.967598000  | 9.541858000  | 8.620999000  |
| C  | 0.983733000  | 9.354957000  | 11.892084000 |
| H  | 1.800208000  | 9.319654000  | 12.626652000 |
| H  | 0.239336000  | 8.598876000  | 12.177770000 |
| H  | 0.521405000  | 10.350129000 | 11.998121000 |
| C  | 0.303994000  | 7.041996000  | 7.497268000  |
| H  | 0.948588000  | 6.422260000  | 6.854267000  |
| H  | -0.366648000 | 7.610778000  | 6.830231000  |
| H  | -0.325015000 | 6.370288000  | 8.099790000  |

|   |              |              |              |
|---|--------------|--------------|--------------|
| C | 4.172927000  | 10.183404000 | 7.990220000  |
| H | 4.253628000  | 9.908502000  | 6.928933000  |
| H | 5.099259000  | 9.861287000  | 8.484677000  |
| H | 4.145137000  | 11.278784000 | 8.072181000  |
| C | 5.052480000  | 13.288344000 | 13.488315000 |
| H | 5.627900000  | 12.394546000 | 13.223355000 |
| H | 5.317552000  | 13.612457000 | 14.506106000 |
| H | 5.298405000  | 14.084508000 | 12.772888000 |
| C | 2.976573000  | 11.703895000 | 14.691757000 |
| H | 1.901788000  | 11.473257000 | 14.711719000 |
| H | 3.303799000  | 12.075915000 | 15.674407000 |
| H | 3.529311000  | 10.789258000 | 14.443030000 |
| C | 2.567862000  | 14.470385000 | 14.100579000 |
| H | 2.762199000  | 15.304644000 | 13.410610000 |
| H | 3.028159000  | 14.687684000 | 15.076859000 |
| H | 1.480466000  | 14.349569000 | 14.196945000 |
| C | 1.818202000  | 12.836615000 | 7.694765000  |
| H | 2.073780000  | 11.805253000 | 7.418874000  |
| H | 2.733534000  | 13.444202000 | 7.684740000  |
| H | 1.111207000  | 13.241834000 | 6.954244000  |
| C | -0.415962000 | 11.807052000 | 9.122783000  |
| H | -1.029135000 | 12.177106000 | 8.286776000  |
| H | -0.992956000 | 11.832330000 | 10.057919000 |
| H | -0.098519000 | 10.772419000 | 8.926040000  |
| C | 0.358665000  | 14.541715000 | 9.439559000  |
| H | -0.290215000 | 14.749396000 | 8.574333000  |
| H | 1.177255000  | 15.276047000 | 9.469433000  |
| H | -0.218010000 | 14.622391000 | 10.371539000 |

## References

1. A. Van Der Ent, A. L. Onderdelinden and R. A. Schunn, in *Inorganic Syntheses*, **1990**, vol. 28, pp. 90-92.
2. W. Wolfsberger and H. Schmidbaur, *Syn. React. Inorg. Metal-Org. Chem.*, 1974, **4**, 149-156.
3. K. Issleib and A. Brack, *Z. anorg. allg. Chem.*, 1954, **277**, 258-270.
4. M. Schäfer, J. Schäfer, R. D. Dewhurst, W. C. Ewing, M. Krahfuß, M. W. Kuntze-Fechner, M. Wehner, C. Lambert and H. Braunschweig, *Chem. Eur. J.*, 2016, **22**, 8603-8609.
5. B. Liang, M. Dai, J. Chen and Z. Yang, *J. Org. Chem.*, 2005, **70**, 391-393.
6. G. Doisneau, G. Balavoine and T. Fillebeen-Khan, *J. Organomet. Chem.*, 1992, **425**, 113-117.
7. A. J. Arduengo, H. V. R. Dias, R. L. Harlow and M. Kline, *J. Am. Chem. Soc.*, 1992, **114**, 5530-5534.
8. T. Schaub, M. Backes and U. Radius, *Organometallics*, 2006, **25**, 4196-4206.
9. (a) C. Busetto, A. D'Alfonso, F. Maspero, G. Perego and A. Zazzetta, *J. Chem. Soc., Dalton Trans.*, 1977, 1828-1834; (b) H. Werner, J. Wolf, U. Schubert and K. Ackermann, *J. Organomet. Chem.*, 1983, **243**, C63-C70.
10. H. Braunschweig, K. Geetharani, J. O. C. Jimenez-Halla and M. Schäfer, *Angew. Chem. Int. Ed.*, 2014, **53**, 3500-3504.
11. G. Sheldrick, *Acta Cryst.*, 2015, **A71**, 3-8.
12. G. Sheldrick, *Acta Cryst.*, 2008, **A64**, 112-122.
13. F. Neese, *WIREs Comput. Mol. Sci.*, 2012, **2**, 73-78.
14. C. Adamo and V. Barone, *J. Chem. Phys.*, 1999, **110**, 6158-6170.
15. F. Weigend and R. Ahlrichs, *Phys. Chem. Chem. Phys.*, 2005, **7**, 3297.
16. D. Andrae, U. Häußermann, M. Dolg, H. Stoll and H. Preuß, *Theor. Chim. Acta*, 1990, **77**, 123-141.
17. S. Grimme, J. Antony, S. Ehrlich and H. Krieg, *J. Chem. Phys.*, 2010, **132**, 154104.
18. S. Grimme, S. Ehrlich and L. Goerigk, *J. Comput. Chem.*, 2011, **32**, 1456-1465.
19. F. Neese, *J. Comput. Chem.*, 2003, **24**, 1740-1747.
20. F. Neese, F. Wennmohs, A. Hansen and U. Becker, *Chem. Phys.*, 2009, **356**, 98-109.
21. (a) J. Tao, J. P. Perdew, V. N. Staroverov and G. E. Scuseria, *Phys. Rev. Lett.*, 2003, **91**, 146401; (b) V. N. Staroverov, G. E. Scuseria, J. Tao and J. P. Perdew, *J. Chem. Phys.*, 2003, **119**, 12129-12137.
22. A. V. Marenich, C. J. Cramer and D. G. Truhlar, *J. Phys. Chem. B*, 2009, **113**, 6378-6396.
23. (a) C. P. Kelly, C. J. Cramer, D. G. J. Truhlar, *J. Chem. Theory Comput.* 2005, **1**, 1133-1152. (b) M. Sparta, C. Riplinger, F. Neese, *J. Chem. Theory Comput.* 2014, **10**, 1099-1108.
24. C. Y. Legault, CYLview, version 1.0.561b; Université de Sherbrooke, Sherbrooke, QC, Canada, 2009; <http://www.cylview.org>.
25. 1 K. Ishida, K. Morokuma and A. Komornicki, *J. Chem. Phys.*, 1977, **66**, 2153-2156.
